# Supplementary material for: Drought Responsive Putative Marker-Trait Association in Tall Fescue as Influenced by the Presence of a Novel Endophyte
Source: Frontiers journal article supplement (doi:10.3389/fpls.2021.729797), 2021-10-20

**A**

Mean=98.69, stdev=3.39

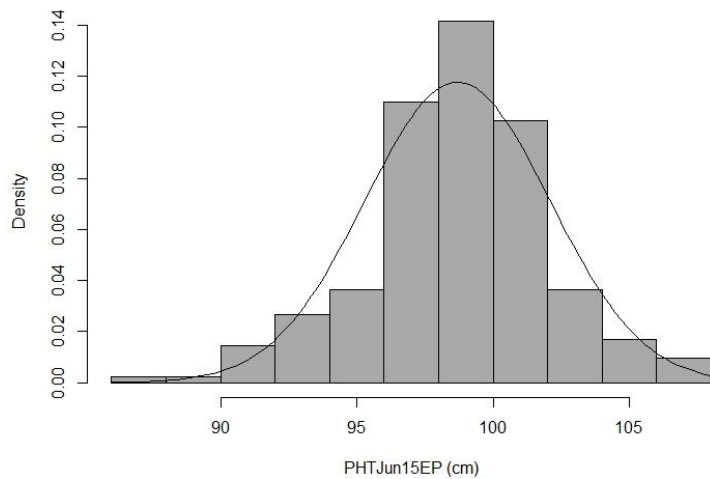

Mean=95.75, stdev=4.64

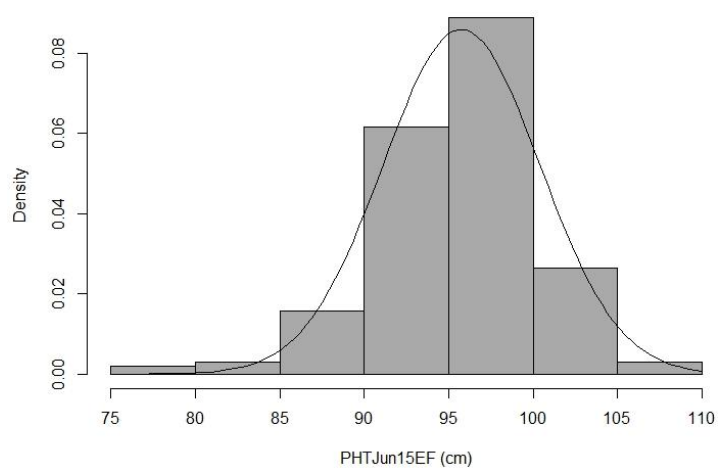

Mean=128.85, stdev=6.39

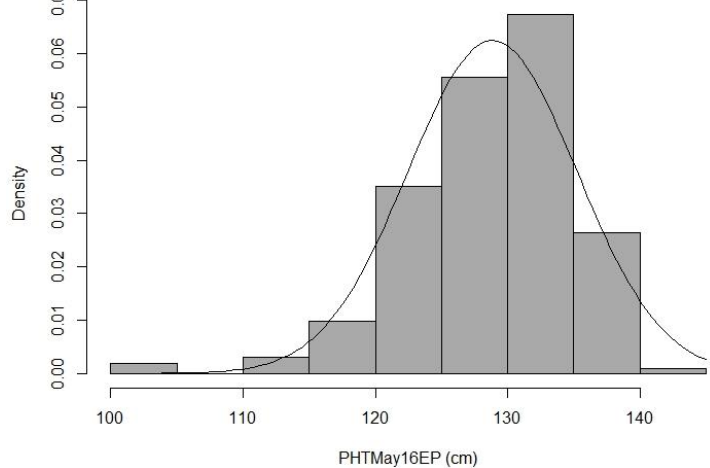

Mean=125.37, stdev=6.79

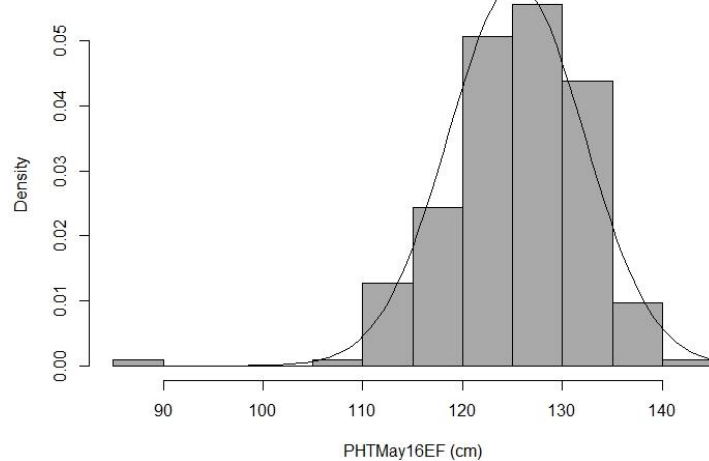

Mean=38.62, stdev=3.20

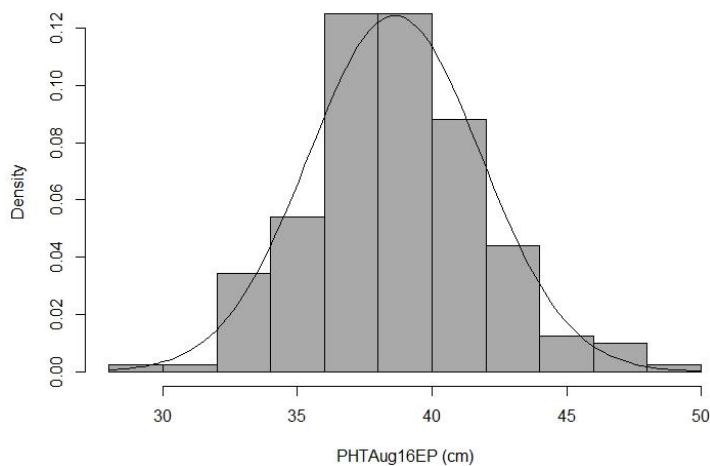

Mean=34.50, stdev=2.23

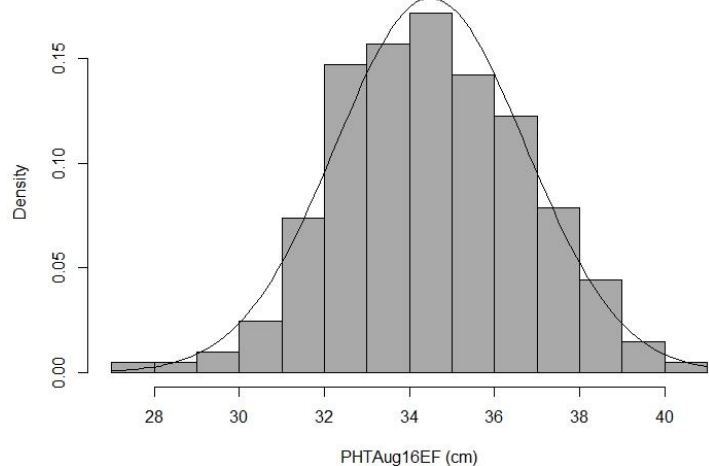

Mean=40.47, stdev=3.79

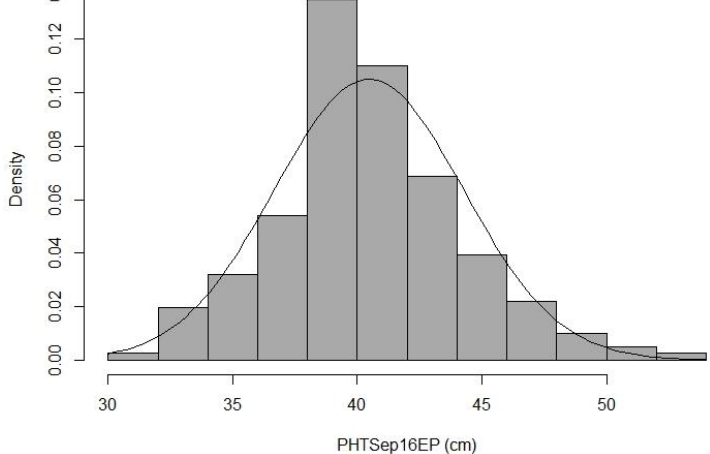

Mean=35.52, stdev=3.19

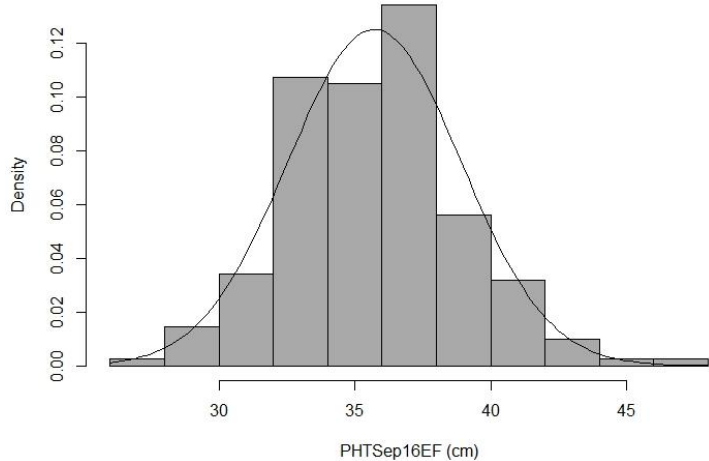

Mean=48.73, stdev=2.28

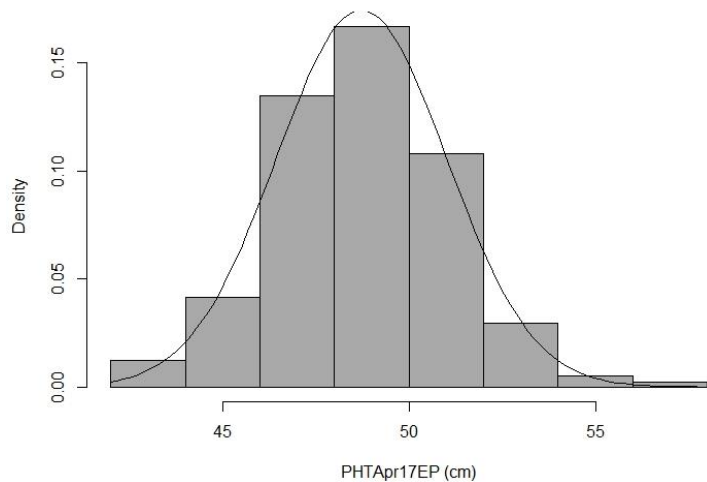

Mean=44.46, stdev=2.58

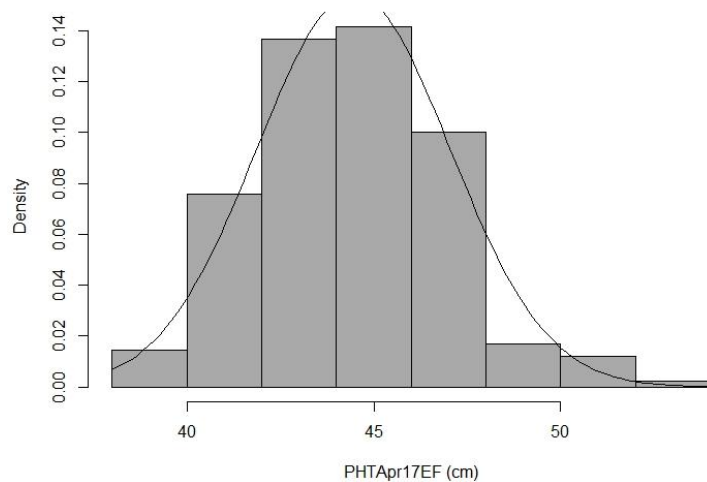

Mean=38.72, stdev=2.35

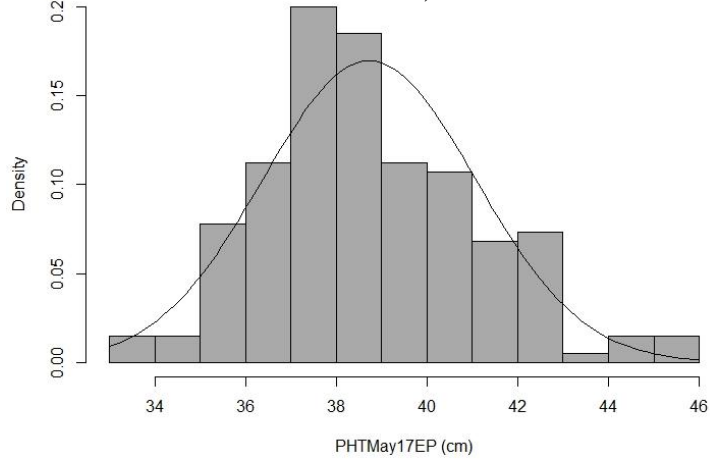

Mean=38.28, stdev=0.61

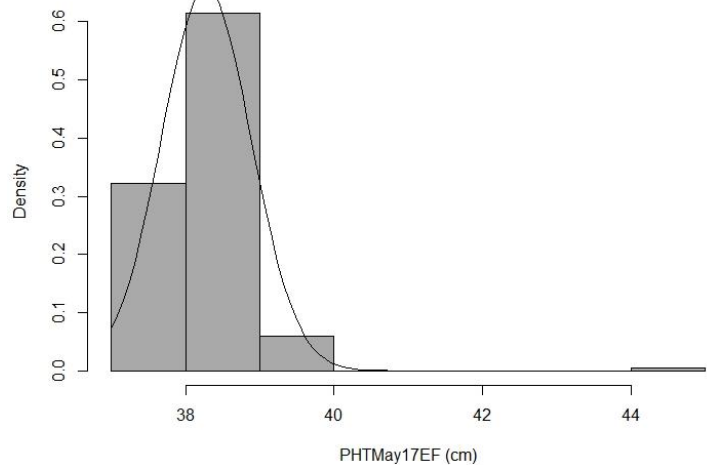

Mean=39.97, stdev=0.79

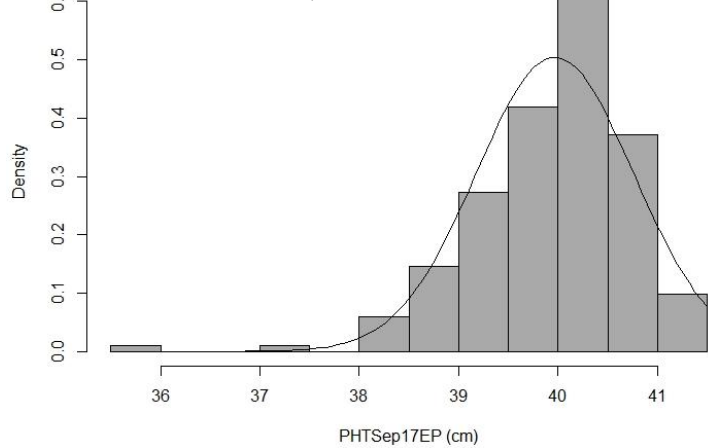

Mean=38.10, stdev=0.80

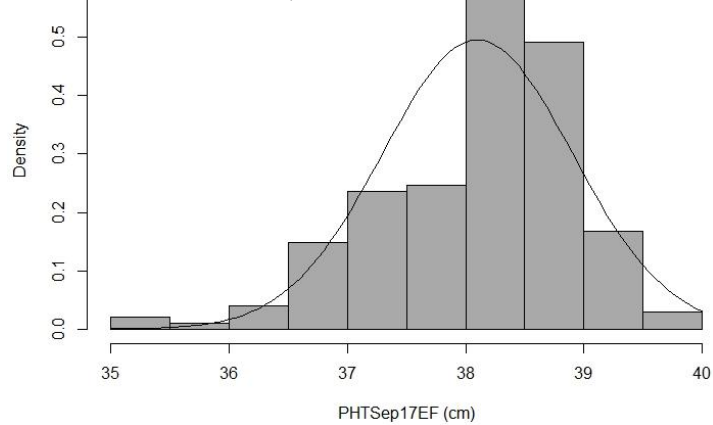

Mean=39.57, stdev=0.85

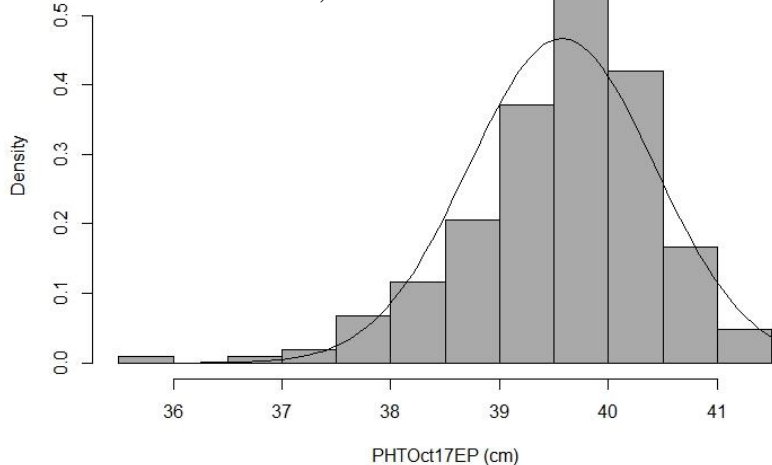

Mean=38.16, stdev=0.95

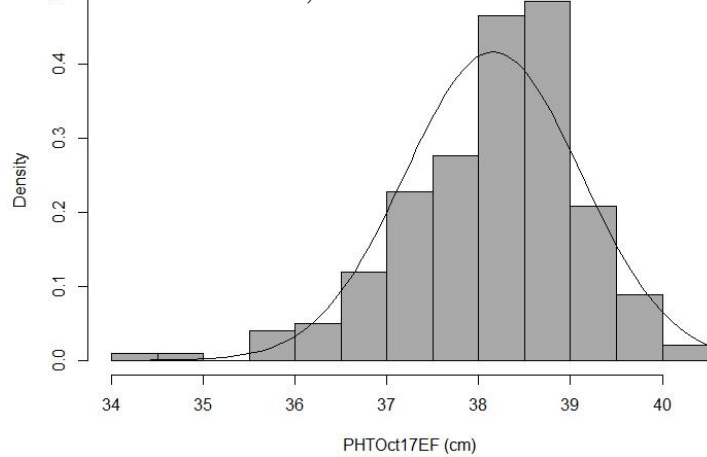

**B**

Mean=21.20, stdev=0.79

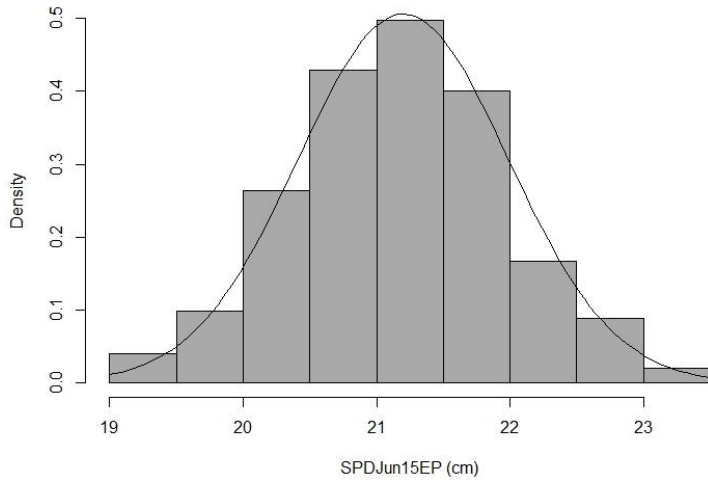

Mean=20.73, stdev=0.95

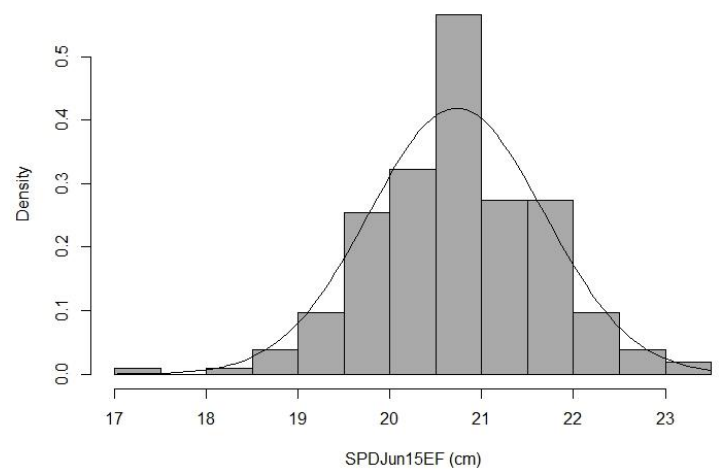

Mean=27.54, stdev=2.19

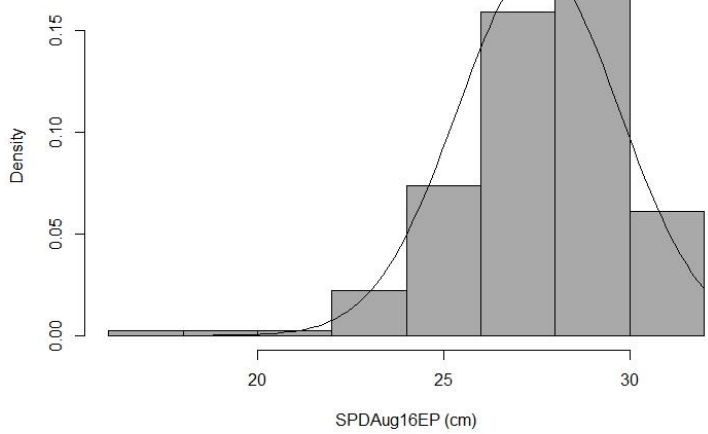

Mean=24.81, stdev=1.91

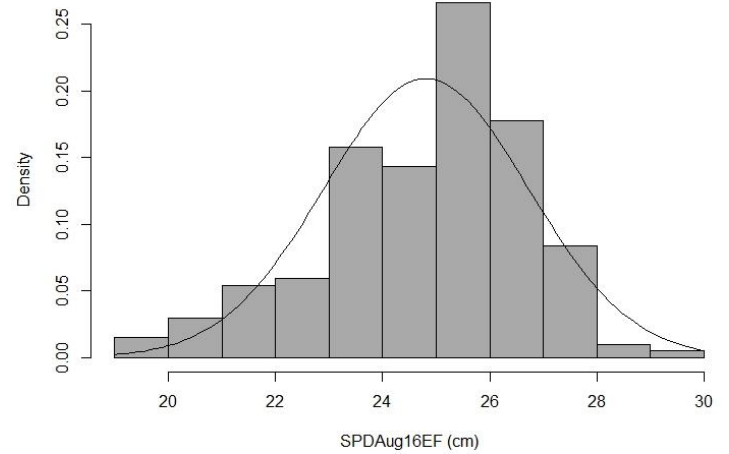

Mean=29.05, stdev=2.25

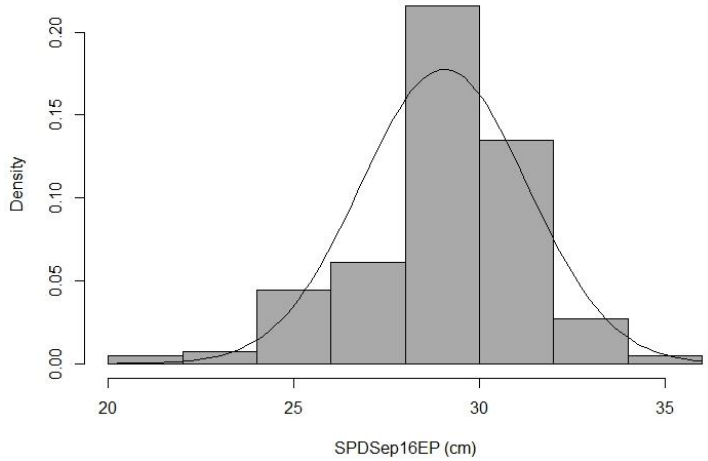

Mean=25.28, stdev=2.57

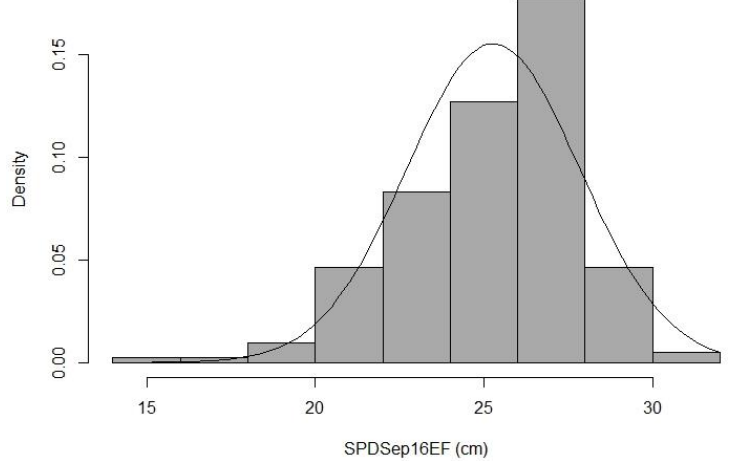

Mean=43.43, stdev=1.89

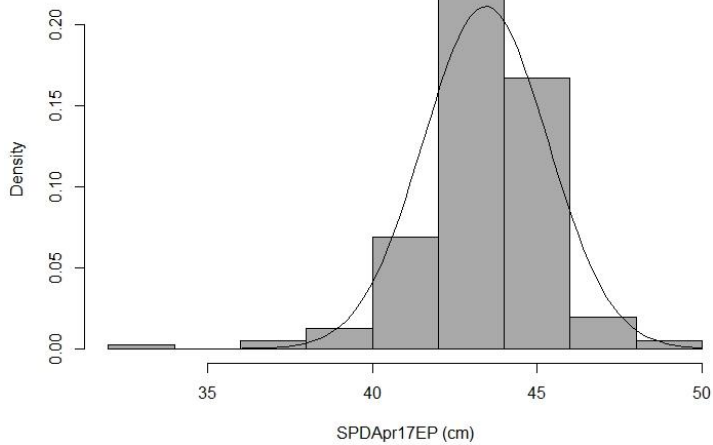

Mean=40.08, stdev=2.01

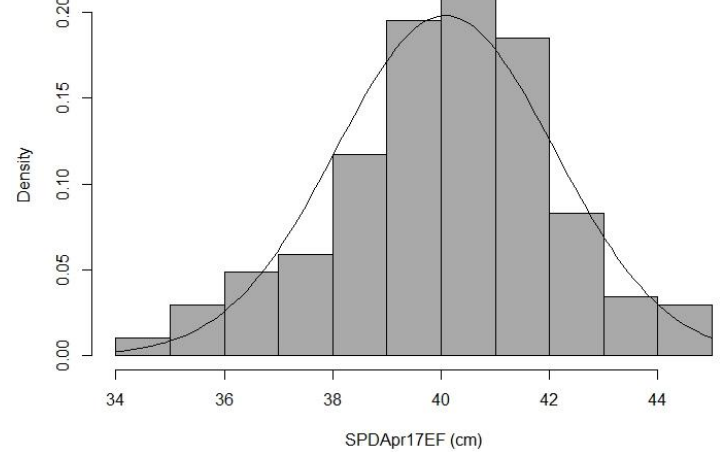

Mean=28.66, stdev=1.53

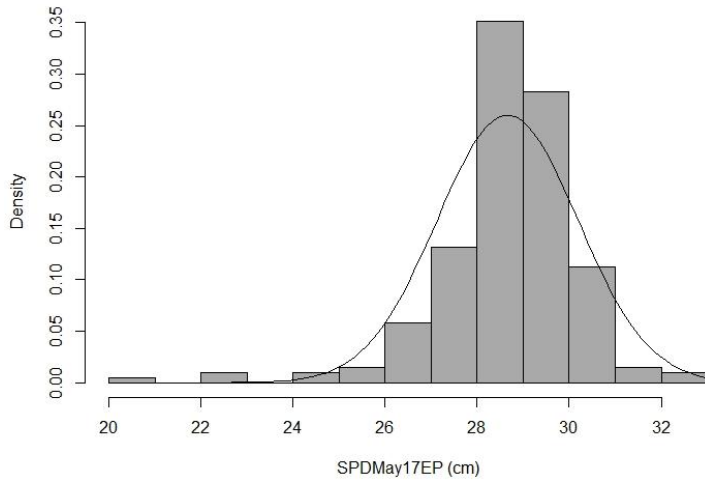

Mean=26.95, stdev=1.00

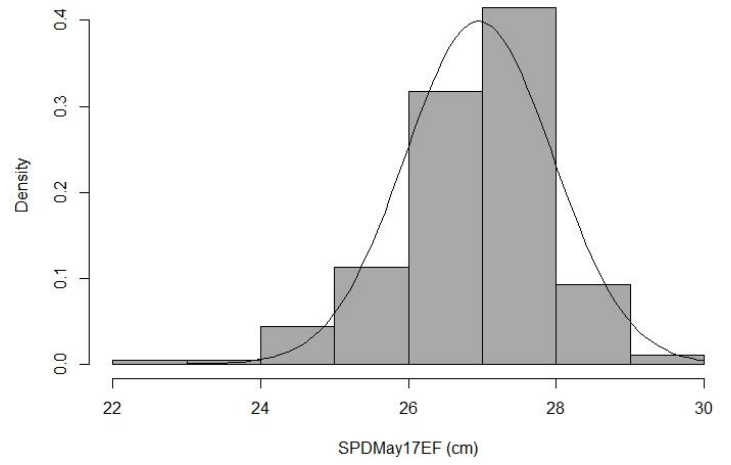

Mean=28.52, stdev=0.96

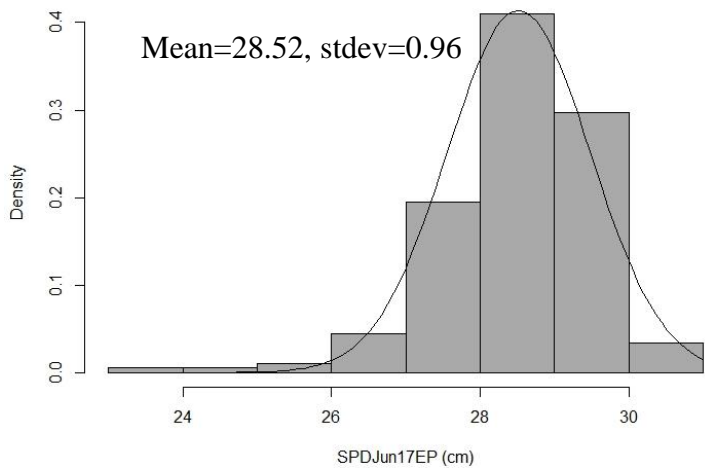

Mean=27.16, stdev=1.24

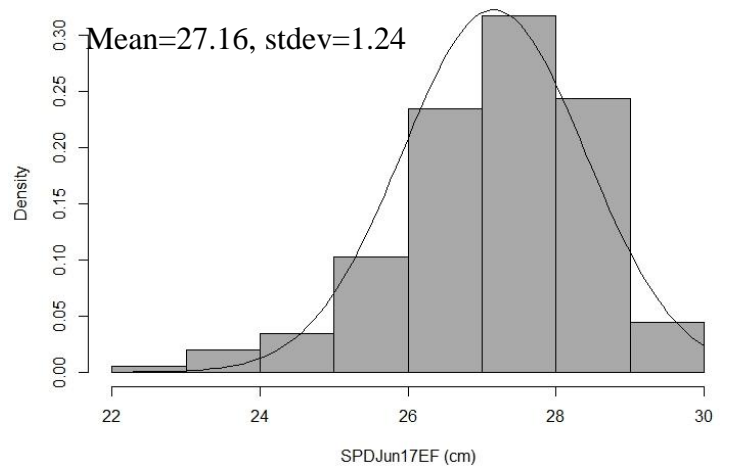

Mean=32.86, stdev=0.29

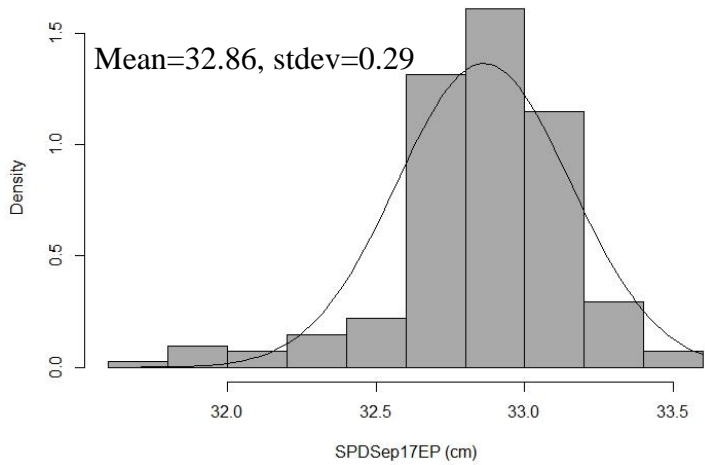

Mean=30.71, stdev=0.86

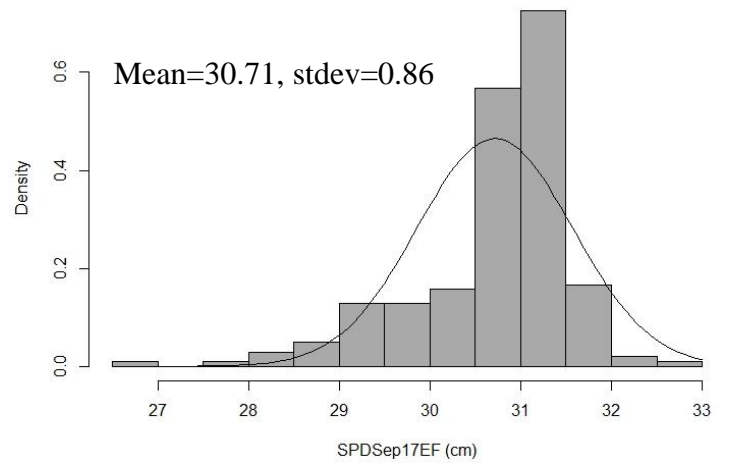

Mean=34.34, stdev=0.21

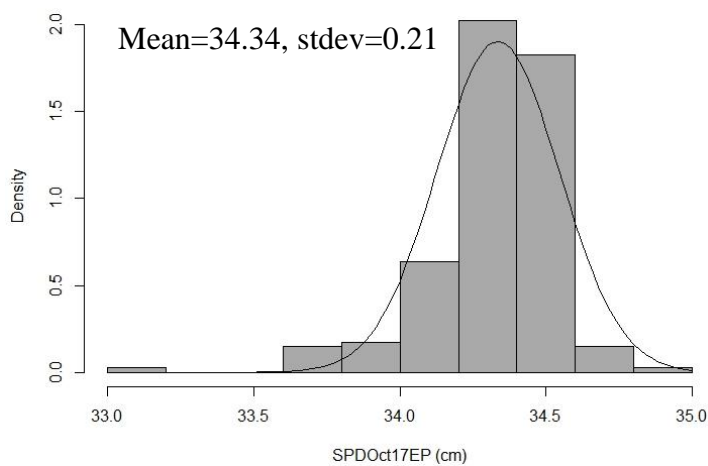

Mean=33.41, stdev=0.65

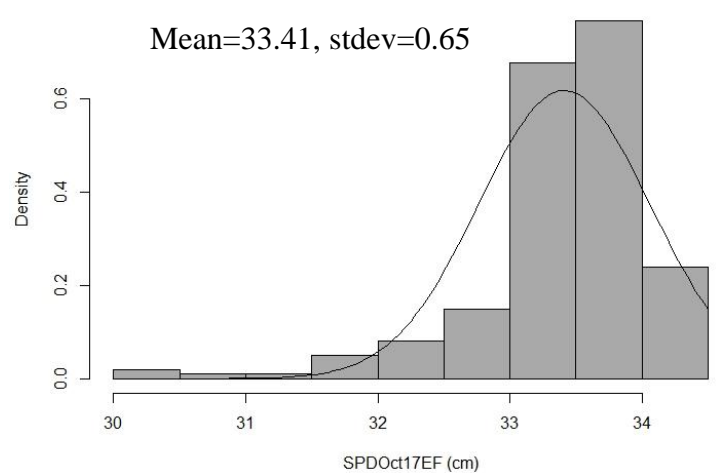

**C**

Mean=7.78, stdev=0.20

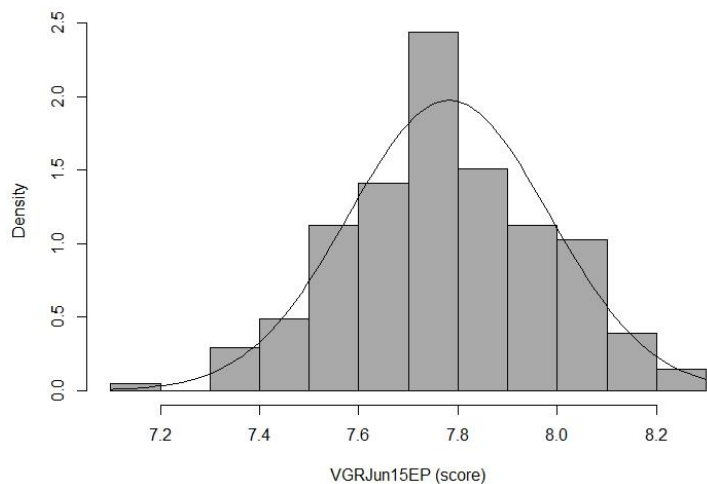

Mean=7.73, stdev=0.18

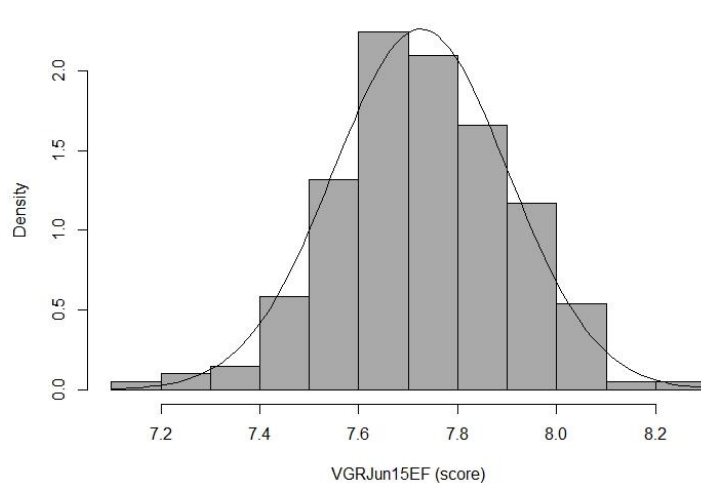

Mean=5.19, stdev=0.38

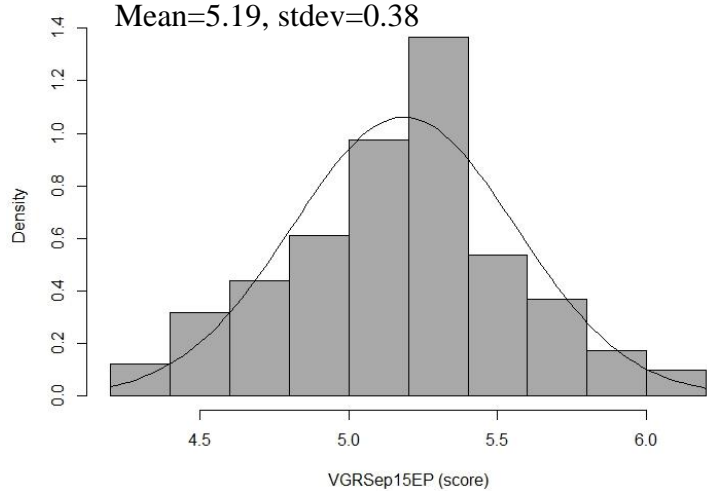

Mean=5.05, stdev=0.58

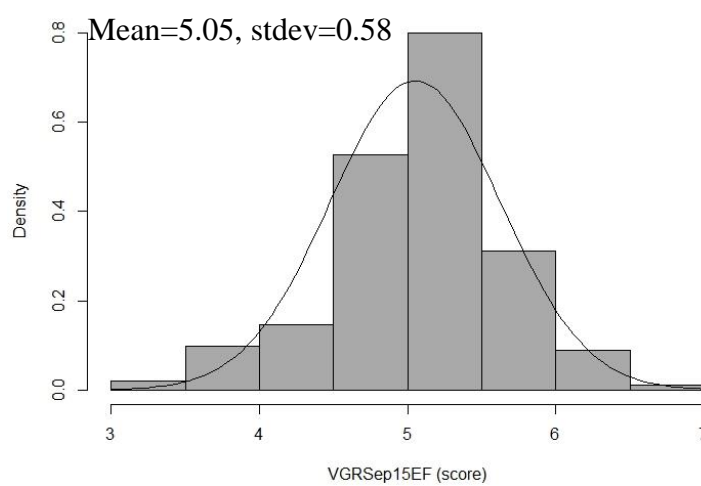

Mean=6.82, stdev=0.46

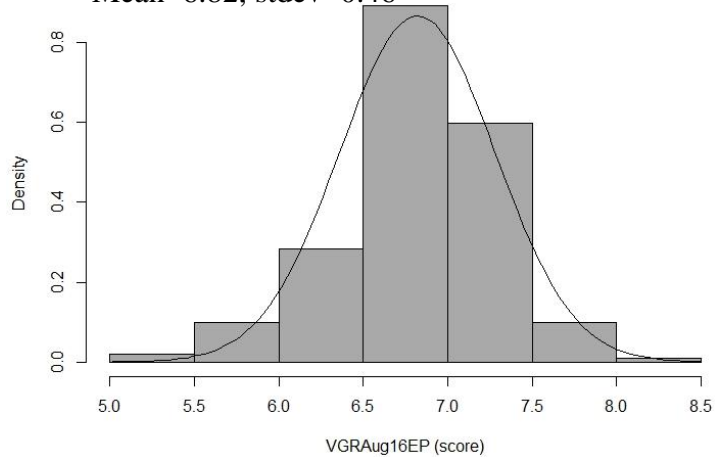

Mean=6.11, stdev=0.53

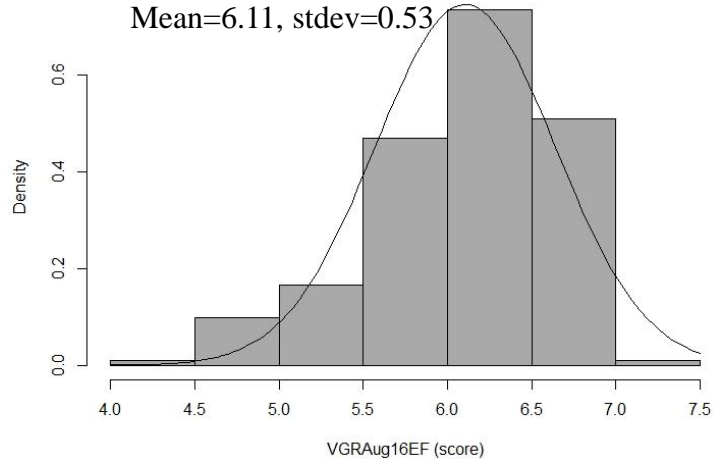

Mean=6.41, stdev=0.27

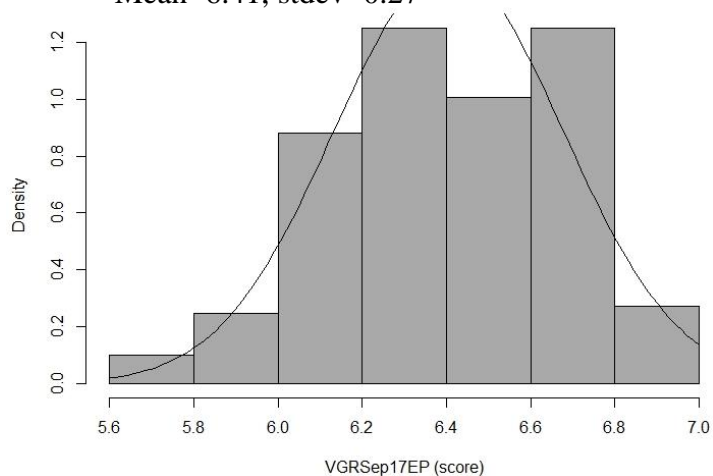

Mean=5.49, stdev=0.44

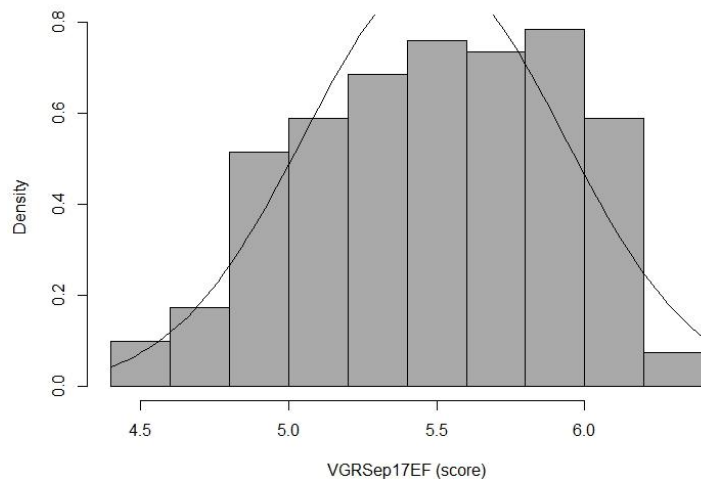

Mean=6.15, stdev=0.29

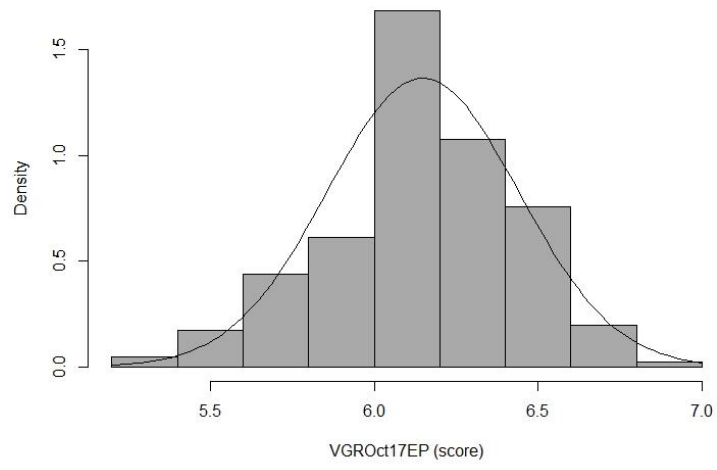

Mean=5.32, stdev=0.44

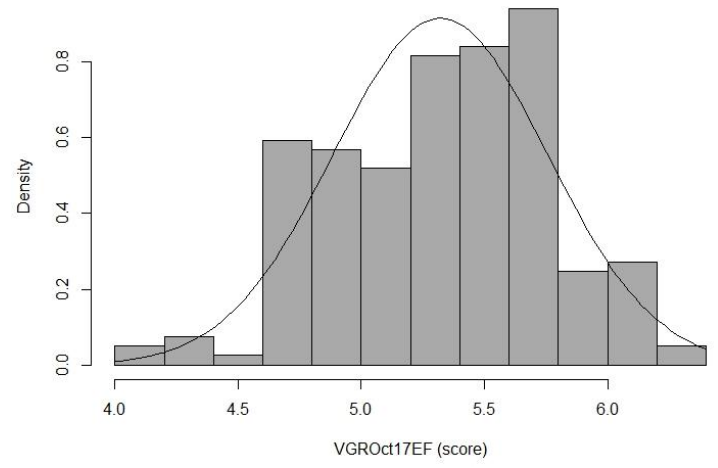

**D**

Mean=92.65, stdev=10.37

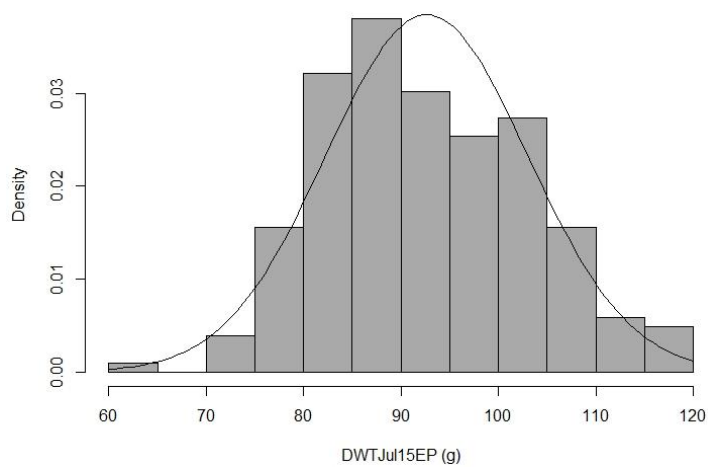

Mean=97.74, stdev=8.50

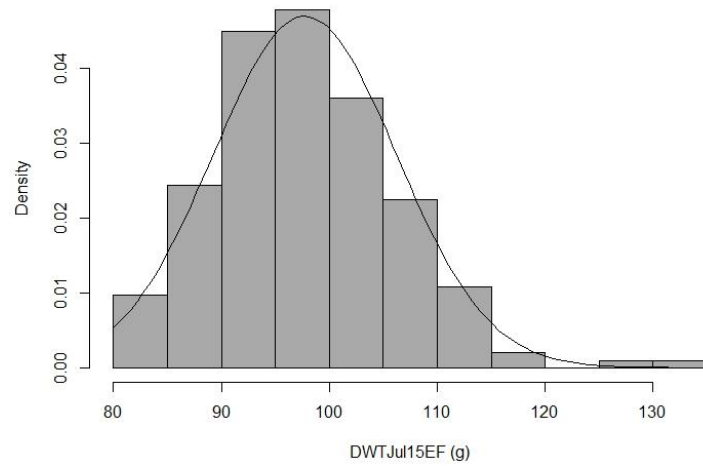

Mean=278.05, stdev=17.15

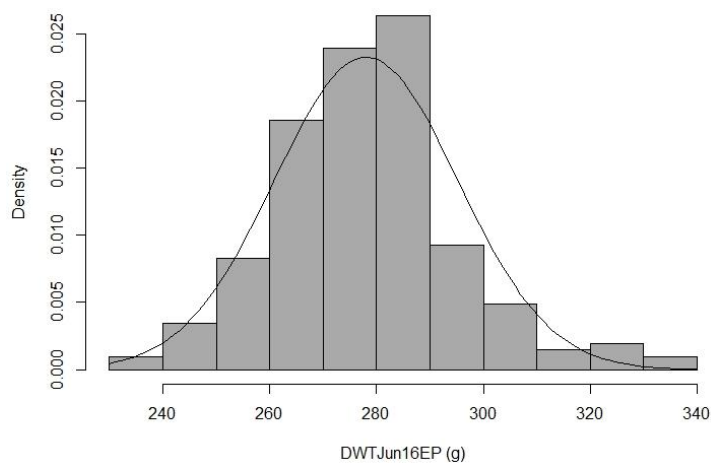

Mean=277.19, stdev=21.10

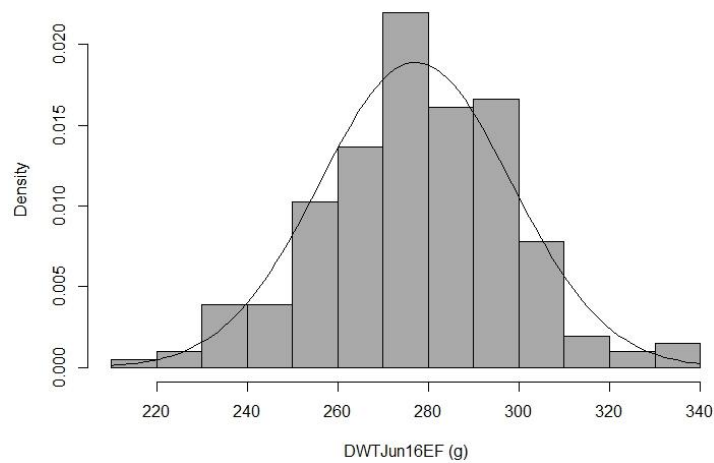

Mean=168.43, stdev=1.84

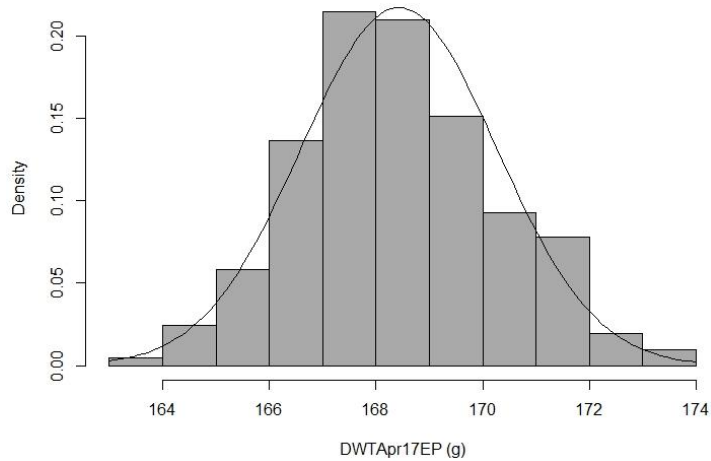

Mean=167.59, stdev=5.30

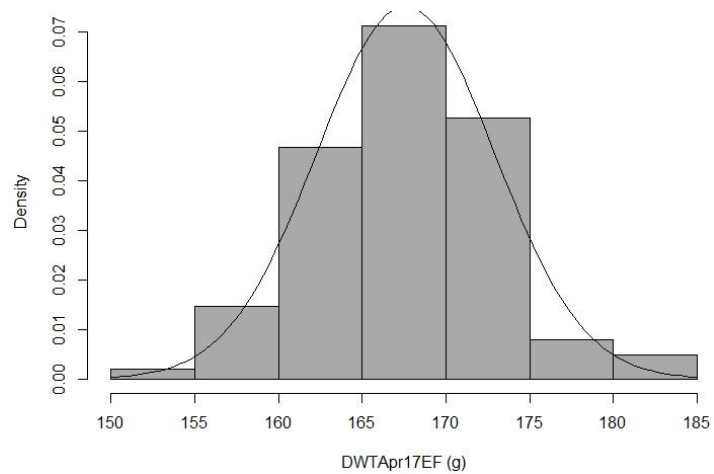

Mean=83.30, stdev=3.63

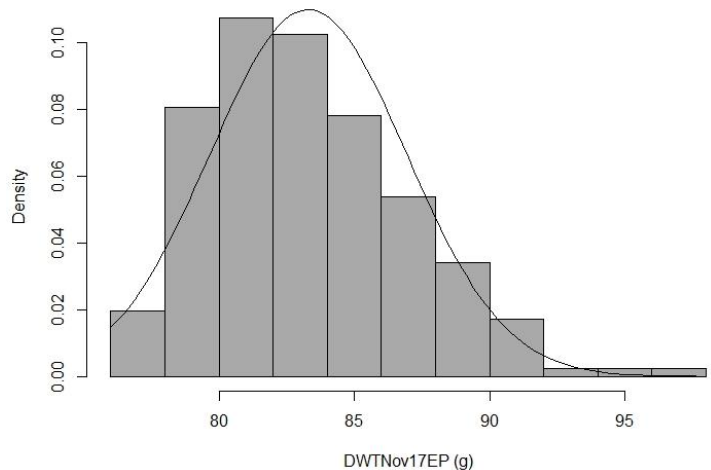

Mean=83.78, stdev=12.00

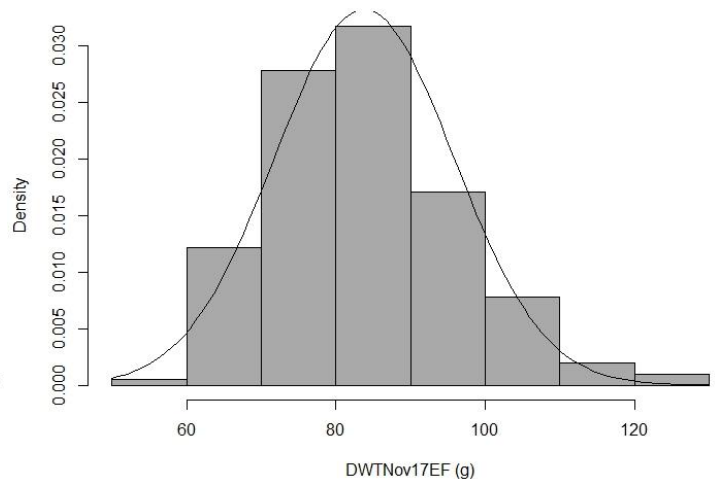

Mean=77.16, stdev=1.65

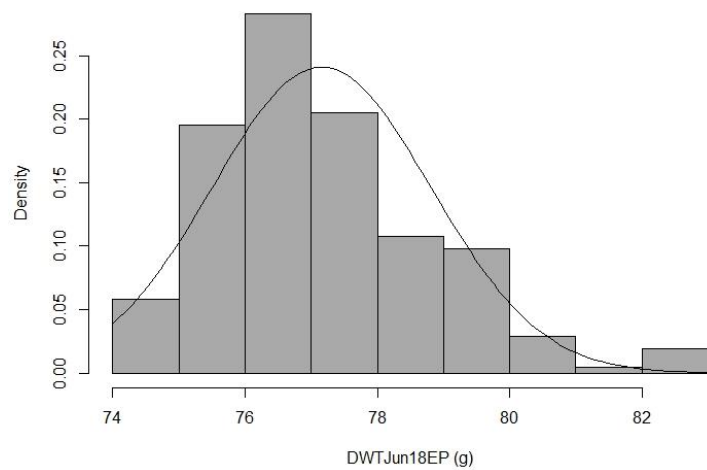

Mean=71.94, stdev=5.83

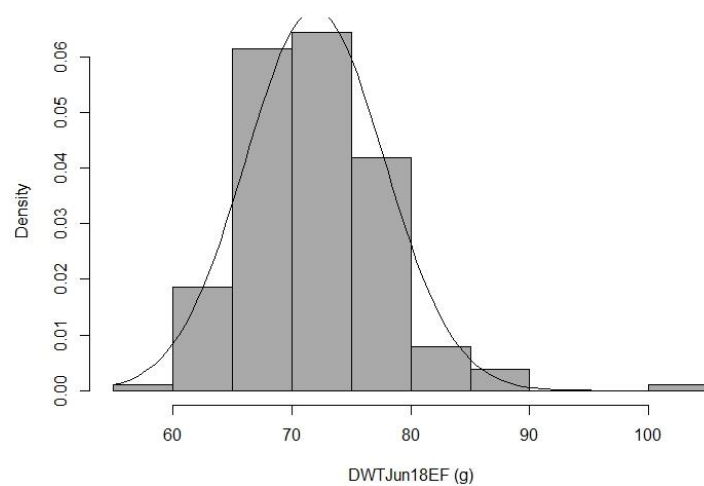

Supplement: Data_Sheet_1.zip [file Data_Sheet_1.zip]
