# Supplementary material for: Drought Responsive Putative Marker-Trait Association in Tall Fescue as Influenced by the Presence of a Novel Endophyte
Source: Front Plant Sci. 2021 Oct 20;12:729797. doi: 10.3389/fpls.2021.729797 (PMC8565914; doi:10.3389/fpls.2021.729797)
Supplement: Supplementary file 3 [file Table_2.XLSX]

## Sheet: Sheet1
Supplementary Table S2 SNP markers used for genome-wide association mapping to identify genetic loci associated with plant morphology and biomass yield in tall fescue clonal populations with or without an endophyte
SNP ID	Alleles	Chromosome	SNP marker position (bp)	Strand	D07001	D07002	D07003	D07004	D07005	D07008	D07010	D07011	D07012	D07013	D07014	D07015	D07016	D07017	D07018	D07019	D07020	D07021	D07022	D07023	D07024	D07025	D07026	D07027	D07029	D07031	D07032	D07034	D07035	D07038	D07039	D07040	D07042	D07044	D07046	D07047	D07048	D07049	D07050	D07051	D07052	D07053	D07054	D07055	D07056
1542	C/T	Unknown	126384	+	CC	CC	CC	CC	CT	CC	CC	CC	CC	CC	CC	CC	CC	CC	CC	CC	CC	CC	CC	CC	CC	CC	CC	CC	CC	CT	CC	CC	CC	CC	CC	CC	CC	CC	CC	CC	CC	CC	CC	CC	CC	CC	CC	CC	CC
1938	C/T	Unknown	158882	+	CC	CC	CC	CC	CT	CC	CC	CC	CC	CC	CC	CC	CC	CC	CC	CC	CC	CC	CC	CC	CC	CC	CC	CC	CC	CC	CC	CC	CC	CC	CT	CC	CC	CC	CC	CC	CC	CT	CC	CC	CC	CC	CC	CC	CC
3347	C/T	Unknown	274398	+	CC	CC	CC	CC	CC	CC	CC	CC	CC	CC	CC	CC	CC	CC	CC	CC	CC	CC	CC	CC	CC	CC	CC	CC	CC	CC	CC	CC	CC	CC	CC	CC	CC	CC	CC	CC	CC	CC	CT	CC	CC	CC	CC	CC	CC
3720	C/T	Unknown	305005	+	CC	CC	CC	CC	CC	CC	CC	CC	CC	CC	CC	CC	CC	CT	CC	CC	CT	CT	CC	CC	CC	CC	CC	CC	CC	CC	CC	CC	CC	CT	CC	CC	CC	CC	CC	CC	CC	CC	CC	CC	CC	CT	CC	CC	CC
3957	G/A	Unknown	324419	+	GG	GG	GG	GG	GA	GG	GA	GG	GG	GG	GG	GG	GG	GG	GG	GG	GG	GG	GG	GG	GG	GG	GG	GG	GG	GG	GG	GG	GG	GA	GG	GG	GG	GG	GG	GG	GG	GG	GG	GG	GG	GG	GG	GG	GG
4426	A/G	Unknown	362886	+	AA	AA	AA	AA	AA	AA	AA	AA	AG	AA	AA	AA	AA	AA	AA	AA	AA	AA	AA	AA	AA	AA	AA	AA	AA	AA	AA	AA	AA	AA	AA	AA	AA	AA	AG	AA	AG	AA	AA	AG	AA	AA	AA	AA	AA
4777	A/G	Unknown	391657	+	AG	AG	AG	AG	AG	AG	AG	AG	AG	AG	AA	AG	AG	AG	AG	AG	AG	AG	AG	AG	AG	AG	AG	AG	AG	AG	AG	AG	AG	AG	AG	AG	AG	AG	AG	AG	AG	AA	AG	AG	AG	AG	AG	AG	AG
4777	A/G	Unknown	391659	+	AG	AG	AG	AG	AG	AG	AG	AG	AG	AG	AA	AG	AG	AG	AG	AG	AG	AG	AG	AG	AG	AG	AG	AG	AG	AG	AG	AG	AG	AG	AG	AG	AG	AG	AG	AG	AG	AA	AG	AG	AG	AG	AG	AG	AG
8150	A/G	Unknown	668225	+	AG	AG	AG	AG	AG	AG	AG	AG	AG	AG	AG	AG	AG	AG	AG	AG	AG	AG	AG	AG	AG	AG	AG	AG	AG	AG	AG	AG	AG	AG	AG	AG	AG	AG	AG	AG	AG	AG	AG	AG	AG	AG	AG	AG	AG
12557	G/A	Unknown	1029600	+	GA	GG	GA	GA	GG	GG	GA	GG	GA	GG	GA	GA	GG	GA	GA	GA	GG	GG	GA	GA	GG	GA	GA	GA	GG	GA	GG	GG	GG	GA	GG	GG	GA	GG	GA	GG	GA	GG	GG	GA	GG	GG	GG	GA	GA
12662	T/G	Unknown	1038209	+	TT	TG	TT	TT	TT	GG	TT	TG	TT	TG	TG	TT	TG	GG	GG	TT	TT	TG	TT	TG	TT	TT	TT	TT	TT	GG	TG	TT	TT	TT	TT	TT	TT	TG	TT	TT	TT	TG	TG	TT	TG	TG	TG	TG	TT
12788	C/A	Unknown	1048617	+	CC	CC	CC	CC	CC	CC	CC	CA	CC	CC	CC	CC	CC	CC	CC	CC	CC	CC	CC	CC	CC	CC	CC	CC	CC	CC	CC	CC	CC	CC	CC	CC	CC	CC	CC	CC	CC	CC	CC	CC	CC	CC	CC	CC	CC
13159	G/T	Unknown	1078987	+	GG	GG	GG	GG	GG	GG	GG	GG	GG	GG	GG	GG	GT	GG	GG	GT	GT	GG	GG	GG	GT	GG	GG	GG	GG	GT	GG	GG	GG	GG	GG	GG	GG	GG	GG	GG	GG	GG	GG	GG	GG	GG	GG	GG	GT
13229	C/T	Unknown	1084759	+	CC	CC	CC	CC	CC	CC	CC	CC	CC	CC	CC	CC	CC	CC	CC	CC	CC	CC	CC	CC	CC	CC	CC	CC	CC	CC	CC	CC	CC	CC	CC	CC	CC	CC	CC	CC	CC	CC	CC	CC	CC	CC	CT	CC	CC
16061	T/A	Unknown	1316967	+	TT	TT	TT	TT	TT	TT	TT	TT	TT	TT	TT	TT	TT	TT	TA	TT	TT	TT	TT	TT	TT	TT	TT	TT	TT	TT	TT	TT	TT	TT	TT	TT	TT	TT	TT	TT	TT	TT	TT	TT	TT	TT	TA	TT	TT
26296	C/T	Unknown	2156203	+	CC	CC	CC	CC	CC	CC	CT	CC	CC	CC	CC	CC	CC	CC	CC	CC	CC	CT	CC	CC	CC	CC	CC	CC	CC	CC	CC	CC	CC	CC	CC	CC	CC	CC	CC	CC	CC	CC	CC	CC	CC	CC	CC	CC	CC
27607	A/G	Unknown	2263704	+	AG	AG	AG	AG	AA	AG	AG	AG	AA	AG	AG	AG	AG	AG	AG	AG	AG	AG	AG	AG	AG	AG	AG	AG	AA	AG	AG	AG	AG	AG	AG	AG	AA	AG	AG	AG	AG	AG	AG	AG	AG	AG	AG	AG	AG
28155	C/G	Unknown	2308645	+	CG	CC	CC	CC	CC	CG	CC	CC	CC	CC	CC	CC	CC	CC	CC	CC	CC	CG	CC	CC	CG	CC	CC	CC	CC	CC	CC	CC	CC	CC	CC	CC	CC	CC	CC	CC	CC	CC	CC	CC	CC	CC	CC	CC	CC
33940	A/T	Unknown	2783028	+	AA	AA	AA	AA	AA	AA	AA	AA	AA	AA	AA	AA	AA	AA	AA	AA	AT	AA	AA	AT	AA	AA	AA	AA	AA	AA	AA	AA	AA	AA	AA	AA	AA	AA	AA	AA	AA	AA	AT	AA	AA	AA	AA	AA	AA
40657	G/A	Unknown	3333822	+	GG	GG	GG	GA	GG	GG	GG	GG	GG	GG	GG	GA	GG	GG	GG	GG	GG	GG	GG	GG	GG	GG	GG	GG	GG	GG	GG	GG	GG	GG	GA	GG	GG	GG	GG	GG	GG	GG	GG	GA	GG	GG	GG	GG	GG
42675	G/C	Unknown	3499294	+	GC	GC	GC	GC	GC	GC	GC	GC	GC	GC	GC	GC	GG	GG	GC	GC	GC	GC	GC	GC	GC	GC	GC	GC	GC	GC	GC	GC	GC	GG	GC	GC	GC	GC	GC	GC	GC	GC	GC	GC	GC	GC	GG	GC	GC
44661	G/T	Unknown	3662130	+	GG	GG	GG	GG	GG	GT	GT	GG	GT	GG	GG	GG	GG	GG	GT	GG	GG	GT	GG	GG	GG	GG	GG	GT	GT	GG	GG	GT	GG	GG	GG	GG	GG	GG	GG	GG	GG	GT	GG	GT	GG	GG	GG	GG	GG
46961	C/T	Unknown	3850760	+	CC	CT	CC	CC	CC	CC	CC	CT	CC	CC	CC	CC	CC	CC	CC	CC	CC	CC	CC	CC	CC	CC	CC	CC	CC	CC	CC	CC	CC	CC	CC	CT	CC	CC	CC	CC	CC	CC	CC	CC	CC	CC	CC	CC	CC
46961	G/A	Unknown	3850794	+	GG	GG	GG	GG	GG	GG	GG	GG	GG	GG	GG	GG	GG	GG	GG	GG	GG	GG	GG	GG	GG	GG	GG	GG	GG	GG	GG	GG	GG	GG	GA	GG	GG	GG	GG	GG	GG	GG	GA	GG	GG	GG	GG	GG	GG
48868	C/G	Unknown	4007132	+	CC	CC	CC	CC	CC	CC	CG	CG	CG	CG	CC	CC	CG	CC	CC	CC	CC	CC	CC	CC	CG	CC	CC	CG	CC	CC	CG	CC	CC	CC	CC	CC	CC	CC	CC	CC	CC	CG	CC	CC	CC	CC	CC	CC	CC
50430	C/T	Unknown	4135189	+	CT	CC	CC	CC	CC	CC	CC	CC	CC	CC	CT	CC	CC	CC	CT	CC	CC	CC	CC	CC	CC	CC	CT	CC	CC	CC	CT	CT	CC	CT	CC	CT	CC	CC	CC	CC	CC	CC	CC	CT	CC	CT	CC	CC	CC
50430	C/T	Unknown	4135225	+	CC	CC	CC	CC	CC	CC	CT	CC	CC	CC	CC	CC	CC	CC	CC	CC	CC	CT	CC	CC	CC	CC	CC	CC	CC	CC	CC	CC	CC	CC	CC	CC	CC	CC	CC	CC	CC	CC	CC	CC	CC	CT	CC	CC	CT
50808	C/A	Unknown	4166199	+	CC	CC	CC	CC	CA	CC	CC	CC	CC	CC	CC	CC	CC	CC	CC	CC	CC	CC	CC	CC	CC	CC	CC	CC	CC	CC	CC	CC	CC	CC	CC	CC	CC	CC	CC	CC	CC	CC	CC	CC	CC	CC	CC	CC	CC
53037	G/C	Unknown	4348983	+	GG	GG	GG	GG	GC	GG	GG	GG	GG	GG	GG	GG	GG	GG	GG	GG	GG	GG	GG	GG	GG	GG	GG	GG	GG	GG	GG	GG	GG	GG	GG	GG	GG	GG	GG	GG	GG	GG	GG	GG	GG	GG	GG	GG	GG
56927	G/A	Unknown	4667948	+	GA	GG	GG	GG	GG	GG	GA	GA	GA	GG	GA	GA	GG	GG	GG	GG	GG	GG	GG	GG	GG	GG	GG	GG	GG	GG	GG	GG	GA	GG	GA	GA	GG	GG	GG	GG	GG	GG	GA	GG	GG	GA	GA	GG	GG
60982	C/T	Unknown	5000467	+	CC	CC	CC	CC	CC	CC	CC	CC	CC	CC	CC	CC	CC	CC	CC	CC	CC	CC	CC	CC	CC	CT	CC	CC	CC	CC	CC	CC	CC	CC	CC	CC	CC	CC	CC	CC	CC	CC	CC	CC	CC	CT	CC	CC	CC
61181	G/A	Unknown	5016776	+	GG	GA	GG	GG	GG	GG	GG	GG	GG	GG	GG	GG	GG	GG	GG	GG	GG	GG	GG	GG	GG	GG	GG	GG	GG	GG	GG	GG	GG	GA	GG	GG	GG	GG	GG	GG	GG	GG	GG	GG	GG	GG	GG	GG	GG
63709	G/A	Unknown	5224072	+	GG	GG	GG	GG	GG	GG	GG	GG	GG	GG	GG	GG	GG	GG	GG	GG	GG	GG	GG	GG	GG	GG	GG	GA	GA	GG	GG	GG	GG	GG	GA	GG	GG	GG	GG	GG	GA	GA	GG	GG	GG	GG	GG	GA	GG
63709	G/A	Unknown	5224081	+	GG	GG	GG	GG	GG	GG	GA	GG	GG	GA	GG	GG	GG	GA	GG	GG	GG	GG	GG	GG	GG	GG	GA	GG	GG	GG	GG	GG	GG	GG	GA	GG	GG	GG	GG	GG	GG	GG	GG	GG	GG	GG	GG	GG	GG
64168	C/A	Unknown	5261720	+	CC	CC	CC	CC	CC	CC	CC	CC	CC	CC	CC	CC	CC	CC	CA	CC	CA	CC	CC	CA	CC	CC	CC	CC	CC	CC	CC	CC	CC	CA	CC	CC	CC	CC	CC	CC	CC	CC	CC	CC	CC	CC	CC	CC	CC
66716	A/C	Unknown	5470662	+	AC	AA	AC	AC	AC	AA	AA	AA	AC	AC	AA	AC	AA	AC	AA	AA	AA	AA	AC	AA	AC	AA	AA	AA	AC	AC	AA	AA	AC	AA	AC	AA	AC	AA	AC	AC	AC	AA	AA	AC	AA	AA	AA	AC	AC
82386	C/T	Unknown	6755601	+	CC	CC	CT	CC	CC	CC	CC	CC	CC	CT	CC	CC	CC	CC	CT	CC	CT	CT	CT	CT	CC	CC	CC	CC	CT	CC	CT	CC	CC	CC	CT	CC	CC	CC	CC	CC	CC	CC	CC	CC	CC	CC	CT	CC	CC
83839	G/A	Unknown	6874761	+	GG	GG	GG	GG	GG	GG	GG	GG	GG	GG	GG	GG	GG	GG	GG	GG	GG	GG	GG	GG	GG	GG	GG	GG	GG	GG	GG	GA	GG	GG	GG	GG	GG	GG	GG	GG	GG	GG	GA	GG	GG	GG	GG	GG	GG
84397	G/A	Unknown	6920500	+	GA	GA	GA	GA	GA	GA	GA	GA	GA	GA	GA	GA	GA	GA	GA	GA	GA	GA	GA	GG	GA	GA	GA	GA	GA	GA	GA	GA	GA	GA	GA	GA	GA	GG	GA	GA	GA	GA	GA	GA	GA	GG	GA	GA	GA
84397	G/A	Unknown	6920519	+	GA	GA	GA	GA	GA	GA	GA	GA	GA	GA	GA	GA	GA	GA	GA	GA	GG	GA	GA	GA	GA	GA	GA	GA	GA	GA	GG	GA	GG	GA	GA	GA	GA	GA	GA	GA	GA	GA	GG	GA	GA	GA	GA	GA	GA
87683	A/G	Unknown	7189953	+	AG	AA	AA	AA	AA	AA	AA	AA	AA	AA	AA	AA	AA	AA	AG	AA	AA	AA	AA	AA	AA	AA	AA	AA	AG	AA	AA	AA	AA	AA	AA	AA	AA	AA	AA	AA	AA	AA	AA	AA	AG	AA	AA	AA	AA
87683	C/T	Unknown	7189983	+	CC	CC	CC	CC	CC	CC	CC	CC	CC	CC	CC	CC	CC	CC	CC	CC	CC	CC	CC	CC	CC	CC	CC	CC	CC	CT	CC	CC	CC	CC	CC	CC	CC	CC	CT	CC	CC	CT	CT	CC	CC	CC	CC	CC	CC
90778	G/A	Unknown	7443729	+	GG	GG	GG	GG	GG	GG	GG	GG	GG	GG	GG	GG	GA	GG	GG	GG	GG	GG	GG	GG	GG	GG	GG	GG	GG	GG	GG	GG	GG	GG	GG	GG	GG	GG	GG	GG	GG	GG	GG	GG	GG	GG	GG	GG	GG
91195	C/T	Unknown	7477916	+	CC	CC	CC	CC	CC	CC	CC	CT	CC	CC	CC	CC	CC	CC	CC	CC	CT	CC	CC	CC	CT	CC	CC	CC	CC	CT	CC	CC	CC	CC	CC	CC	CC	CC	CC	CT	CC	CT	CC	CC	CC	CC	CC	CC	CC
96449	G/T	Unknown	7908749	+	GG	GT	GG	GT	GT	GT	GG	GG	GG	GG	GG	GT	GG	GG	GG	GG	GG	GG	GG	GG	GT	GG	GG	GG	GG	GG	GG	GG	GG	GG	GT	GG	GG	GG	GG	GG	GT	GG	GG	GG	GG	GG	GG	GG	GG
99776	C/T	Unknown	8181612	+	CC	CT	CC	CC	CC	CC	CC	CC	CC	CC	CT	CC	CC	CC	CC	CC	CC	CC	CC	CC	CC	CC	CT	CC	CT	CC	CC	CC	CC	CC	CC	CT	CC	CC	CC	CC	CC	CC	CC	CC	CC	CC	CC	CC	CC
101114	C/T	Unknown	8291315	+	CC	CC	CC	CC	CC	CT	CC	CC	CC	CC	CC	CT	CC	CC	CC	CC	CC	CC	CC	CC	CC	CC	CC	CC	CC	CC	CC	CC	CC	CC	CC	CC	CC	CC	CC	CC	CC	CC	CT	CC	CC	CC	CT	CC	CC
102297	C/A	Unknown	8388308	+	CA	CA	CA	CA	CA	CA	CA	CA	CA	CA	CA	CA	CA	CA	CA	CA	CA	CA	CA	CA	CA	CA	CA	CA	CA	CA	CA	CA	CA	CA	CA	CA	CA	CA	CA	CA	CA	CA	CA	CA	CC	CA	CA	CA	CA
105265	G/C	Unknown	8631683	+	GG	GG	GG	GG	GG	GG	GG	GG	GG	GG	GG	GC	GG	GG	GG	GG	GG	GC	GG	GG	GC	GG	GG	GG	GG	GG	GG	GC	GG	GG	GG	GG	GG	GG	GG	GG	GG	GG	GG	GG	GG	GG	GG	GG	GG
107306	C/G	Unknown	8799022	+	CC	CC	CC	CC	CC	CC	CG	CC	CC	CG	CC	CC	CC	CC	CC	CC	CC	CC	CC	CG	CC	CC	CC	CC	CC	CC	CC	CC	CC	CC	CC	CC	CC	CC	CC	CC	CG	CC	CG	CG	CC	CC	CC	CC	CC
107306	C/G	Unknown	8799065	+	CC	CC	CC	CC	CC	CC	CC	CC	CC	CG	CC	CC	CC	CC	CC	CC	CC	CC	CC	CC	CG	CC	CC	CC	CC	CC	CC	CC	CC	CC	CC	CC	CC	CC	CC	CC	CC	CC	CC	CC	CC	CG	CG	CC	CC
108972	A/C	Unknown	8935658	+	AC	AC	AC	AC	AC	AC	AA	AC	AA	AC	AC	AC	AC	AC	AC	AC	AC	AC	CC	AC	AC	AC	AC	AC	AC	AC	AC	AC	AC	AC	AC	AC	CC	AC	AC	CC	CC	AC	AA	AC	AC	AC	AA	CC	AC
114881	T/G	Unknown	9420186	+	TG	TT	TG	TT	TT	TT	TG	TT	TG	TT	TT	TT	TT	TT	TT	TG	TT	TT	TT	TT	TT	TG	TT	TT	TT	TT	TG	TG	TT	TG	TT	TT	TT	TT	TT	TT	TT	TT	TT	TT	TG	TT	TT	TT	TT
124271	G/A	Unknown	10190175	+	GG	GG	GG	GG	GG	GG	GG	GG	GG	GA	GA	GG	GG	GG	GG	GG	GG	GG	GG	GG	GG	GG	GG	GG	GA	GG	GG	GG	GG	GG	GG	GG	GG	GG	GG	GG	GG	GG	GG	GG	GG	GG	GG	GG	GG
124999	C/G	Unknown	10249894	+	CG	CC	CC	CC	CC	CC	CC	CC	CC	CG	CC	CC	CC	CC	CC	CC	CC	CC	CC	CC	CC	CC	CC	CC	CC	CC	CC	CC	CC	CC	CC	CC	CC	CC	CC	CC	CC	CC	CC	CC	CC	CC	CC	CC	CC
125605	C/T	Unknown	10299562	+	CT	CC	CC	CC	CC	CC	CC	CC	CC	CC	CC	CC	CC	CC	CT	CC	CC	CC	CC	CC	CC	CC	CC	CC	CC	CT	CC	CC	CC	CC	CC	CT	CT	CT	CC	CC	CC	CC	CC	CC	CC	CC	CC	CC	CC
125605	T/G	Unknown	10299570	+	TT	TT	TT	TT	TT	TT	TT	TT	TT	TT	TT	TT	TT	TT	TT	TT	TT	TT	TT	TT	TT	TT	TT	TT	TT	TT	TT	TG	TT	TT	TT	TG	TT	TT	TT	TT	TT	TT	TG	TG	TG	TG	TG	TT	TT
126048	G/T	Unknown	10335880	+	GG	GG	GG	GG	GT	GT	GG	GG	GG	GG	GG	GG	GG	GT	GG	GG	GG	GG	GG	GG	GT	GG	GG	GG	GG	GG	GG	GG	GG	GG	GG	GG	GG	GG	GG	GG	GG	GG	GT	GG	GT	GG	GG	GG	GG
126438	G/A	Unknown	10367863	+	GA	GG	GG	GG	GG	GG	GG	GG	GG	GG	GG	GA	GG	GG	GG	GG	GG	GG	GG	GG	GG	GA	GG	GA	GG	GG	GG	GG	GG	GA	GA	GG	GG	GG	GG	GG	GG	GG	GG	GG	GG	GG	GA	GG	GG
129376	A/G	Unknown	10608769	+	AA	AG	AA	AA	AA	AG	AA	AA	AA	AA	AA	AA	AA	AA	AA	AG	AA	AG	AA	AA	AA	AA	AA	AA	AA	AA	AA	AA	AA	AA	AA	AA	AA	AA	AA	AA	AA	AA	AA	AA	AG	AG	AG	AA	AA
129376	G/A	Unknown	10608773	+	GA	GA	GA	GA	GA	GA	GA	GA	GA	GA	GA	GA	GA	GA	GA	GA	GA	GA	GA	GA	GA	GA	GA	GG	GA	GA	GA	GA	GA	GA	GA	GA	GA	GA	GA	GA	GA	GA	GA	GA	GA	GA	GA	GA	GA
129412	G/T	Unknown	10611746	+	GT	GG	GT	GG	GG	GG	GG	GG	GG	GG	GG	GG	GG	GG	GG	GG	GG	GG	GG	GG	GG	GG	GG	GG	GG	GG	GG	GT	GG	GG	GT	GG	GG	GT	GG	GG	GG	GG	GG	GG	GT	GG	GG	GG	GG
131364	G/A	Unknown	10771787	+	GG	GG	GG	GG	GG	GG	GG	GG	GG	GG	GG	GG	GG	GG	GG	GG	GG	GG	GG	GG	GG	GG	GG	GG	GG	GG	GG	GG	GG	GG	GG	GG	GG	GG	GG	GG	GG	GG	GA	GG	GG	GG	GG	GG	GG
134567	G/A	Unknown	11034442	+	GA	GA	GG	GA	GA	GG	GA	GA	GG	GA	GA	GA	GG	GA	GG	GA	GA	GA	GA	GA	GG	GA	GG	GA	GA	GG	GG	GA	GA	GA	GA	GA	GA	GA	GA	GA	GA	GG	GA	GA	GG	GG	GA	GA	GA
134980	C/T	Unknown	11068299	+	CC	CC	CC	CC	CC	CC	CC	CC	CC	CC	CT	CT	CC	CC	CT	CC	CC	CC	CC	CC	CC	CC	CC	CC	CC	CC	CC	CT	CC	CC	CC	CC	CC	CC	CC	CC	CC	CC	CC	CC	CC	CC	CC	CC	CC
137697	C/T	Unknown	11291097	+	CT	CT	CT	CT	CT	CT	CT	CT	CT	CT	CT	CT	CT	CC	CC	CT	CT	CT	CT	CT	CT	CT	CT	CT	CT	CT	CT	CT	CT	CT	CT	CC	CT	CT	CT	CT	CT	CT	CT	CT	CT	CT	CT	CT	CT
141609	G/A	Unknown	11611876	+	GG	GG	GG	GG	GG	GG	GG	GG	GG	GG	GG	GG	GG	GG	GA	GG	GG	GG	GG	GG	GG	GG	GA	GG	GA	GG	GG	GG	GG	GG	GG	GA	GG	GG	GG	GG	GG	GG	GG	GG	GA	GG	GA	GG	GA
145831	G/A	Unknown	11958104	+	GG	GG	GG	GG	GG	GG	GG	GG	GG	GG	GG	GG	GG	GG	GG	GG	GG	GG	GG	GG	GG	GG	GG	GG	GG	GG	GG	GG	GG	GG	GG	GG	GG	GG	GG	GG	GG	GA	GG	GG	GG	GG	GG	GG	GA
145932	G/C	Unknown	11966387	+	GC	GG	GG	GG	GG	GG	GG	GC	GG	GG	GG	GG	GG	GG	GG	GG	GG	GG	GG	GG	GG	GG	GG	GG	GG	GG	GG	GG	GG	GC	GG	GG	GG	GG	GG	GG	GG	GG	GG	GG	GG	GG	GG	GG	GG
146406	G/T	Unknown	12005242	+	GG	GG	GG	GG	GG	GG	GT	GG	GG	GG	GG	GG	GG	GG	GG	GG	GG	GG	GG	GG	GG	GG	GG	GG	GG	GG	GG	GG	GG	GG	GG	GT	GG	GT	GG	GG	GG	GT	GG	GG	GG	GG	GG	GG	GG
146406	G/A	Unknown	12005249	+	GG	GG	GG	GG	GG	GA	GG	GG	GG	GG	GG	GG	GG	GG	GG	GG	GG	GG	GG	GG	GG	GG	GG	GG	GG	GG	GA	GG	GG	GG	GG	GG	GG	GG	GG	GG	GG	GG	GA	GG	GG	GG	GG	GG	GG
147281	T/C	Unknown	12076991	+	TT	TT	TT	TT	TT	TT	TT	TT	TT	TT	TT	TT	TT	TT	TT	TT	TT	TT	TT	TT	TT	TT	TT	TT	TT	TC	TT	TC	TT	TT	TT	TT	TT	TT	TT	TT	TT	TT	TT	TT	TT	TT	TT	TT	TT
148271	C/T	Unknown	12158158	+	CC	CC	CC	CC	CC	CC	CC	CC	CC	CC	CC	CT	CC	CC	CC	CC	CC	CC	CC	CC	CC	CT	CT	CC	CC	CC	CC	CC	CC	CT	CC	CC	CC	CC	CC	CC	CC	CC	CT	CC	CC	CC	CC	CC	CC
148977	C/G	Unknown	12216039	+	CC	CG	CC	CC	CG	CC	CC	CC	CC	CC	CC	CC	CC	CC	CC	CC	CC	CG	CC	CC	CC	CC	CC	CC	CC	CC	CC	CC	CC	CC	CC	CC	CC	CC	CC	CC	CC	CC	CC	CC	CC	CC	CC	CC	CC
154284	C/T	Unknown	12651241	+	CC	CC	CC	CC	CC	CC	CC	CC	CC	CC	CC	CC	CC	CC	CC	CC	CC	CC	CC	CC	CC	CC	CC	CC	CC	CT	CC	CC	CC	CC	CC	CC	CC	CC	CC	CC	CC	CC	CC	CC	CC	CC	CC	CC	CC
154301	C/T	Unknown	12652637	+	CC	CC	CC	CC	CT	CC	CC	CC	CT	CC	CC	CC	CC	CC	CT	CC	CC	CC	CC	CC	CC	CC	CC	CC	CC	CC	CT	CC	CC	CC	CC	CC	CC	CC	CC	CC	CC	CC	CC	CC	CC	CC	CC	CC	CC
154301	G/T	Unknown	12652638	+	GG	GG	GG	GT	GG	GG	GG	GG	GG	GG	GG	GG	GG	GG	GT	GG	GG	GG	GG	GG	GG	GG	GG	GG	GG	GG	GG	GG	GG	GT	GT	GT	GG	GG	GG	GG	GG	GG	GG	GG	GG	GG	GG	GG	GG
156385	C/T	Unknown	12823510	+	CC	CC	CC	CC	CC	CC	CC	CC	CC	CC	CC	CC	CC	CC	CC	CC	CC	CC	CC	CC	CC	CC	CC	CC	CC	CC	CC	CT	CC	CC	CC	CC	CC	CC	CT	CC	CC	CC	CC	CC	CC	CC	CC	CC	CC
156792	G/A	Unknown	12856884	+	GG	GG	GG	GG	GG	GG	GG	GG	GG	GG	GG	GG	GG	GG	GA	GG	GG	GG	GG	GG	GG	GG	GG	GG	GG	GG	GG	GA	GG	GG	GA	GA	GG	GG	GG	GG	GG	GG	GG	GG	GG	GG	GG	GG	GG
156916	G/A	Unknown	12867074	+	GG	GG	GG	GG	GA	GG	GA	GG	GG	GG	GG	GG	GG	GG	GG	GG	GA	GG	GG	GG	GG	GG	GG	GG	GG	GG	GG	GA	GG	GG	GG	GG	GG	GG	GG	GG	GG	GA	GG	GG	GG	GG	GG	GG	GG
157661	G/A	Unknown	12928144	+	GA	GA	GA	GG	GA	GG	GG	GG	GA	GA	GG	GA	GA	GA	GA	GG	GA	GA	GA	GA	GA	GG	GA	GA	GG	GA	GG	GG	GG	GA	GG	GA	GA	GG	GA	GG	GA	GG	GG	GA	GG	GA	GG	GA	GG
158653	G/A	Unknown	13009498	+	GA	GA	GA	GG	GA	GA	GA	GA	GA	GA	GA	GA	GA	GA	GA	GA	GA	GG	GA	GA	GA	GA	GA	GA	GA	GA	GA	GA	GA	GA	GA	GA	GG	GA	GA	GA	GA	GA	GA	GA	GA	GA	GA	GA	GA
162149	G/A	Unknown	13296170	+	GG	GG	GG	GG	GG	GG	GG	GG	GG	GG	GG	GG	GG	GG	GA	GG	GG	GA	GG	GG	GG	GG	GG	GG	GG	GG	GG	GG	GG	GG	GG	GG	GG	GG	GG	GG	GA	GG	GG	GG	GG	GG	GG	GG	GG
164403	C/T	Unknown	13480971	+	CT	CC	CC	CC	CC	CC	CC	CC	CC	CC	CC	CC	CC	CC	CC	CC	CC	CC	CC	CC	CC	CC	CC	CC	CC	CC	CC	CC	CC	CC	CC	CC	CC	CC	CC	CC	CC	CC	CC	CT	CC	CC	CC	CC	CT
164403	G/A	Unknown	13480975	+	GG	GG	GG	GG	GG	GG	GG	GG	GG	GG	GA	GG	GA	GG	GA	GG	GG	GG	GG	GG	GG	GG	GG	GG	GG	GA	GG	GG	GG	GG	GG	GG	GG	GG	GG	GG	GG	GG	GG	GG	GG	GG	GG	GG	GG
164418	C/G	Unknown	13482205	+	CC	CC	CC	CC	CC	CC	CC	CC	CC	CC	CC	CC	CC	CC	CC	CC	CC	CC	CC	CC	CC	CC	CC	CC	CC	CG	CC	CC	CC	CC	CC	CC	CC	CC	CC	CC	CC	CG	CG	CC	CC	CC	CG	CC	CC
165381	C/T	Unknown	13561188	+	CC	CC	CC	CC	CC	CC	CC	CC	CC	CC	CT	CC	CC	CC	CC	CC	CC	CC	CC	CC	CC	CC	CT	CT	CC	CT	CC	CC	CC	CC	CT	CC	CC	CC	CC	CC	CC	CC	CC	CC	CC	CC	CC	CC	CC
165667	G/C	Unknown	13584636	+	GG	GG	GG	GG	GC	GC	GG	GG	GG	GG	GG	GG	GC	GG	GG	GG	GG	GG	GG	GG	GG	GG	GG	GG	GC	GG	GG	GG	GG	GG	GC	GG	GG	GG	GG	GG	GG	GG	GG	GG	GG	GG	GG	GG	GG
167603	G/A	Unknown	13743411	+	GG	GG	GG	GG	GG	GG	GG	GG	GG	GG	GG	GG	GG	GG	GG	GG	GG	GG	GG	GG	GG	GG	GG	GA	GA	GG	GG	GG	GG	GA	GG	GA	GG	GA	GG	GG	GG	GG	GG	GG	GG	GA	GG	GG	GG
167604	A/C	Unknown	13743475	+	AC	AC	AA	AC	AA	AC	AA	AA	AC	AC	AA	AC	AC	AC	AC	AC	AC	AC	AA	AA	AA	AC	AC	AC	AC	AC	AC	AC	AC	AC	AC	AC	AA	AC	AA	AA	AA	AC	AC	AC	AA	AC	AC	AA	AC
171756	G/T	Unknown	14083944	+	GT	GG	GG	GG	GG	GG	GG	GG	GG	GG	GG	GG	GG	GG	GG	GG	GG	GG	GG	GG	GG	GG	GG	GG	GG	GG	GG	GG	GG	GG	GG	GG	GG	GG	GG	GG	GG	GG	GG	GG	GG	GG	GG	GG	GG
175178	G/A	Unknown	14364559	+	GA	GG	GG	GG	GG	GG	GG	GA	GG	GG	GG	GG	GG	GG	GG	GG	GG	GG	GG	GG	GG	GG	GG	GG	GG	GG	GG	GG	GG	GG	GA	GG	GG	GA	GG	GG	GG	GG	GG	GG	GG	GG	GG	GG	GG
179215	G/A	Unknown	14695573	+	GG	GG	GG	GG	GG	GG	GA	GA	GG	GA	GG	GG	GG	GG	GG	GG	GG	GG	GG	GG	GG	GG	GG	GG	GG	GG	GG	GG	GG	GG	GG	GG	GG	GG	GG	GG	GG	GG	GG	GG	GA	GG	GG	GG	GG
179914	T/C	Unknown	14752880	+	TT	TT	TT	TT	TT	TT	TT	TT	TT	TT	TT	TT	TT	TT	TC	TT	TT	TT	TT	TT	TT	TT	TT	TT	TT	TT	TT	TT	TT	TT	TT	TT	TT	TT	TT	TT	TT	TC	TT	TT	TT	TT	TT	TT	TT
180466	G/A	Unknown	14798170	+	GG	GG	GG	GG	GG	GA	GG	GG	GA	GG	GG	GG	GG	GG	GG	GG	GG	GG	GG	GG	GG	GG	GG	GA	GG	GG	GG	GG	GG	GG	GG	GG	GG	GG	GG	GG	GG	GG	GG	GG	GG	GG	GG	GG	GG
180466	G/A	Unknown	14798184	+	GG	GG	GG	GG	GG	GA	GG	GG	GA	GG	GG	GG	GG	GG	GG	GG	GG	GG	GG	GG	GG	GG	GG	GA	GG	GG	GG	GG	GG	GG	GG	GG	GG	GG	GG	GG	GG	GG	GG	GG	GG	GG	GG	GG	GG
180964	G/C	Unknown	14839003	+	GG	GG	GG	GG	GG	GG	GG	GG	GG	GG	GG	GG	GG	GG	GG	GG	GG	GG	GG	GG	GG	GG	GG	GG	GG	GG	GG	GG	GG	GG	GG	GG	GG	GG	GG	GG	GG	GG	GG	GG	GG	GG	GG	GG	GG
181353	C/T	Unknown	14870888	+	CC	CC	CC	CC	CC	CC	CC	CC	CC	CC	CC	CC	CC	CC	CC	CC	CC	CC	CC	CC	CC	CC	CT	CC	CC	CT	CC	CC	CC	CC	CC	CC	CC	CC	CC	CC	CC	CC	CC	CC	CC	CC	CC	CC	CC
181475	C/T	Unknown	14880901	+	CC	CC	CC	CC	CC	CC	CC	CC	CC	CC	CC	CC	CC	CC	CC	CC	CC	CC	CC	CC	CC	CC	CC	CC	CC	CC	CC	CC	CC	CC	CC	CC	CC	CC	CC	CC	CC	CC	CC	CC	CC	CC	CC	CC	CC
181586	C/T	Unknown	14890016	+	CT	CC	CC	CC	CC	CC	CC	CC	CC	CC	CC	CC	CT	CC	CT	CC	CC	CT	CC	CC	CC	CC	CC	CC	CC	CC	CC	CC	CC	CC	CC	CC	CC	CC	CC	CC	CC	CC	CC	CC	CC	CC	CC	CC	CC
182179	C/T	Unknown	14938635	+	CC	CC	CC	CC	CC	CC	CT	CT	CC	CC	CC	CC	CC	CC	CC	CC	CC	CC	CC	CC	CC	CC	CC	CC	CC	CC	CC	CC	CT	CC	CC	CC	CC	CC	CC	CC	CC	CC	CC	CC	CC	CC	CC	CC	CC
182636	C/T	Unknown	14976098	+	CC	CT	CT	CT	CT	CT	CT	CT	CT	CT	CC	CT	CT	CT	CT	CC	CT	CT	CC	CT	CT	CT	CT	CT	CT	CT	CT	CT	CT	CT	CT	CT	CT	CT	CT	CT	CT	CT	CT	CT	CT	CT	CT	CT	CT
182783	A/G	Unknown	14988167	+	AG	AG	AG	AG	AG	AG	AG	AG	AG	AG	AG	AG	AG	AG	AA	AG	AG	AG	AG	AG	AG	AG	AG	AG	AG	AG	AG	AG	AG	AG	AG	AG	AG	AG	AG	AG	AG	AG	AG	AG	AG	AG	AG	AG	AG
183013	C/G	Unknown	15007040	+	CG	CG	CG	CG	CC	CG	CG	CG	CG	CG	CG	CG	CG	CG	CC	CC	CG	CG	CG	CG	CG	CC	CG	CG	CC	CC	CC	CC	CG	CG	CG	CG	CG	CG	CG	CG	CG	CG	CG	CG	CG	CG	CG	CG	CG
184022	G/A	Unknown	15089738	+	GG	GG	GG	GG	GA	GA	GG	GG	GG	GG	GG	GG	GG	GG	GG	GG	GG	GG	GG	GG	GG	GG	GG	GA	GG	GG	GG	GA	GG	GG	GG	GG	GG	GG	GG	GG	GG	GG	GG	GG	GG	GG	GG	GG	GG
184337	C/T	Unknown	15115574	+	CC	CC	CC	CC	CC	CC	CC	CC	CT	CC	CC	CC	CC	CC	CC	CC	CC	CC	CC	CC	CC	CC	CC	CC	CT	CC	CC	CT	CC	CC	CC	CC	CC	CC	CC	CC	CC	CC	CC	CC	CC	CC	CC	CC	CC
184388	A/G	Unknown	15119771	+	AG	AA	AA	AA	AA	AA	AA	AA	AA	AG	AA	AA	AA	AA	AA	AA	AA	AA	AA	AA	AA	AA	AA	AA	AG	AA	AG	AA	AA	AA	AA	AA	AA	AG	AA	AA	AA	AA	AA	AA	AG	AA	AA	AA	AA
184388	C/A	Unknown	15119786	+	CC	CC	CC	CC	CC	CA	CC	AA	CC	CC	CC	CA	CC	CC	CC	CC	CA	CC	CC	CC	CC	CC	CC	CC	CC	CC	CC	CC	CC	CC	CA	CC	CC	CC	CC	CC	CC	CC	CA	CC	CC	CC	CC	CC	CC
184783	G/A	Unknown	15152145	+	GA	GA	GA	GA	GA	GG	GA	GG	GG	GA	GA	GG	GA	GA	GA	GA	GA	GA	GA	GA	GA	GA	GA	GA	GA	GA	GA	GA	GA	GG	GA	GA	GA	GA	GA	GA	GA	GA	GG	GA	GA	GA	GA	GA	GA
184783	C/T	Unknown	15152146	+	CT	CT	CT	CT	CT	CC	CT	CC	CC	CT	CT	CC	CT	CT	CT	CT	CT	CT	CT	CT	CT	CT	CT	CT	CT	CT	CT	CT	CT	CC	CT	CT	CT	CT	CT	CT	CT	CT	CC	CT	CT	CT	CT	CT	CT
184928	T/A	Unknown	15164059	+	TT	TT	TT	TT	TT	TT	TT	TT	TT	TT	TT	TT	TT	TT	TT	TT	TT	TT	TT	TT	TT	TT	TT	TT	TT	TT	TT	TT	TT	TA	TT	TT	TT	TT	TT	TT	TT	TA	TT	TT	TT	TT	TT	TT	TT
185045	G/T	Unknown	15173618	+	GT	GG	GG	GG	GT	GG	GG	GG	GG	GT	GG	GG	GG	GG	GG	GG	GG	GG	GG	GG	GG	GT	GG	GG	GG	GT	GG	GT	GG	GG	GG	GG	GG	GG	GG	GG	GG	GG	GG	GG	GG	GG	GG	GG	GG
186216	T/C	Unknown	15269649	+	TC	TT	TC	TC	TT	TC	TC	TT	TT	TC	TT	TC	TT	TC	TC	TT	TT	TC	TC	TC	TC	TC	TT	TC	TC	TC	TC	TT	TC	TT	TT	TC	TC	TC	TC	TT	TT	TC	TT	TT	TT	TC	TT	TC	TC
187077	T/A	Unknown	15340265	+	TA	TA	TA	TA	TA	TT	TA	TA	TA	TA	TA	TA	TA	AA	TA	TA	TA	TA	TA	TA	TA	TA	TA	TA	TA	TA	TA	TA	TA	TA	TA	TA	TT	TA	TT	TA	TA	TA	TA	TA	TA	TT	TA	TA	TA
187139	C/T	Unknown	15345365	+	CC	CC	CC	CT	CC	CC	CC	CC	CT	CC	CC	CC	CC	CC	CC	CC	CC	CC	CC	CC	CC	CC	CC	CC	CC	CC	CC	CC	CC	CT	CC	CC	CC	CC	CC	CC	CC	CC	CC	CC	CC	CC	CT	CC	CC
188432	C/T	Unknown	15451376	+	CC	CC	CC	CC	CT	CC	CT	CC	CT	CC	CC	CC	CC	CC	CC	CC	CC	CC	CC	CC	CC	CC	CC	CC	CC	CC	CC	CC	CC	CC	CC	CC	CC	CC	CC	CC	CC	CC	CC	CC	CC	CC	CC	CC	CC
188672	G/A	Unknown	15471034	+	GA	GG	GG	GG	GG	GG	GG	GG	GG	GG	GG	GG	GG	GG	GG	GG	GG	GG	GG	GG	GG	GG	GG	GG	GG	GG	GG	GG	GG	GG	GG	GG	GG	GG	GG	GG	GG	GG	GG	GG	GG	GG	GG	GG	GG
189072	G/A	Unknown	15503833	+	GG	GG	GG	GG	GG	GG	GG	GG	GG	GG	GA	GG	GG	GG	GG	GG	GG	GG	GG	GG	GG	GG	GG	GG	GG	GA	GG	GG	GG	GG	GG	GG	GG	GG	GG	GG	GG	GG	GG	GG	GG	GG	GG	GG	GA
189087	C/T	Unknown	15505062	+	CT	CC	CC	CC	CC	CC	CC	CT	CC	CC	CC	CC	CC	CC	CC	CC	CC	CC	CC	CC	CC	CC	CC	CC	CC	CC	CC	CC	CC	CT	CC	CC	CC	CC	CC	CC	CC	CC	CC	CC	CC	CC	CC	CC	CC
189087	T/C	Unknown	15505070	+	TC	TT	TT	TT	TT	TT	TT	TC	TT	TT	TT	TT	TT	TT	TT	TT	TT	TT	TT	TT	TT	TT	TT	TT	TT	TT	TT	TT	TT	TC	TT	TT	TT	TT	TT	TT	TT	TT	TT	TT	TT	TT	TT	TT	TT
189150	G/A	Unknown	15510247	+	GG	GG	GG	GG	GA	GG	GG	GG	GG	GA	GG	GG	GG	GG	GG	GG	GA	GG	GG	GG	GG	GG	GA	GG	GG	GG	GA	GG	GG	GG	GG	GG	GG	GA	GG	GG	GG	GG	GA	GA	GG	GG	GA	GG	GG
189730	G/A	Unknown	15557793	+	GG	GG	GA	GA	GG	GG	GG	GG	GG	GG	GA	GG	GG	GG	GG	GG	GG	GA	GG	GG	GG	GG	GG	GG	GG	GG	GG	GG	GG	GA	GG	GG	GG	GA	GG	GG	GG	GG	GG	GG	GG	GG	GG	GG	GG
189730	C/T	Unknown	15557813	+	CC	CC	CT	CT	CC	CC	CC	CC	CC	CC	CT	CC	CC	CC	CC	CC	CC	CT	CC	CC	CC	CC	CC	CC	CC	CC	CC	CC	CC	CT	CC	CC	CC	CT	CC	CC	CC	CC	CC	CC	CC	CC	CC	CC	CC
190042	G/A	Unknown	15583371	+	GG	GG	GG	GG	GG	GG	GG	GG	GG	GG	GG	GA	GG	GG	GG	GA	GG	GG	GG	GG	GG	GG	GG	GG	GG	GG	GG	GG	GG	GA	GG	GG	GG	GG	GG	GG	GG	GG	GG	GG	GG	GG	GG	GG	GG
190118	C/T	Unknown	15589607	+	CC	CC	CC	CT	CC	CC	CC	CT	CC	CC	CC	CC	CC	CC	CC	CC	CC	CC	CC	CC	CC	CC	CC	CC	CC	CC	CC	CC	CC	CC	CC	CC	CC	CC	CC	CT	CC	CC	CC	CC	CT	CC	CC	CC	CC
190183	G/C	Unknown	15594943	+	GC	GC	GC	GC	GC	GC	GC	GC	GC	GC	GC	GG	GC	GC	GG	GC	GC	GC	GC	GC	GC	GC	GC	GC	GC	GC	GC	GC	GC	GC	GC	GC	GC	GC	GC	GC	GG	GC	GC	GC	GC	GC	GC	GC	GC
191050	C/G	Unknown	15666031	+	CG	CC	CG	CG	CG	CG	CG	CG	CG	CG	CG	CG	CG	CC	CG	CG	CG	CG	CG	CC	CG	CG	CG	CG	CC	CG	CG	CG	CG	CG	CG	CG	CG	CG	CG	CG	CG	CG	CG	CC	CG	CG	CG	CG	CG
191050	T/C	Unknown	15666033	+	TT	TT	TT	TC	TC	TC	TC	TC	TC	TT	TC	TT	TT	TT	TT	TC	TC	TT	TC	TT	TC	TC	TC	TC	TT	TT	TC	TC	TC	TT	TC	TT	TC	TT	TC	TC	TC	TC	TC	TT	TC	TT	TC	TC	TC
191340	C/G	Unknown	15689832	+	CC	CC	CC	CG	CC	CC	CG	CC	CG	CC	CC	CG	CG	CC	CC	CG	CC	CG	CC	CG	CG	CG	CC	CG	CC	CC	CC	CC	CC	CG	CC	CG	CC	CG	CG	CG	CG	CC	CC	CG	CC	CC	CC	CG	CC
191519	G/C	Unknown	15704517	+	GG	GC	GC	GC	GC	GC	GC	GC	GC	GC	GC	GC	GC	GC	GC	GC	GC	GC	GC	GC	GC	GC	GC	GC	GC	GC	GC	GC	GC	GC	GC	GC	GC	GC	GC	GC	GC	GC	GC	GC	GC	GC	GC	GC	GC
191519	G/C	Unknown	15704534	+	GG	GC	GC	GC	GC	GC	GC	GC	GC	GC	GC	GC	GC	GC	GC	GC	GC	GC	GC	GC	GC	GC	GC	GC	GC	GC	GC	GC	GC	GC	GC	GC	GC	GC	GC	GC	GC	GC	GC	GC	GC	GC	GC	GC	GC
191602	C/G	Unknown	15711310	+	CG	CG	CG	CC	CG	CG	CG	CG	CG	CG	CG	CC	CC	CG	CG	CG	CG	CG	CG	CG	CG	CG	CG	CG	CG	CG	CG	CG	CG	CG	CC	CG	CG	CG	CG	CG	CG	CC	CG	CG	CC	CG	CG	CG	CG
192242	C/T	Unknown	15763800	+	CC	CC	CC	CC	CC	CC	CC	CC	CC	CC	CC	CC	CC	CC	CC	CC	CC	CC	CC	CC	CC	CC	CC	CC	CC	CC	CC	CC	CC	CC	CC	CC	CC	CC	CC	CC	CT	CC	CC	CC	CC	CC	CC	CC	CC
192590	C/A	Unknown	15792310	+	CC	CC	CC	CC	CC	CC	CC	CC	CC	CC	CC	CC	CC	CC	CC	CC	CC	CC	CC	CC	CC	CC	CC	CC	CC	CC	CC	CC	CC	CC	CA	CC	CC	CC	CC	CC	CA	CC	CC	CC	CC	CC	CC	CC	CC
192606	G/C	Unknown	15793624	+	GG	GG	GC	GC	GG	GG	GG	GC	GC	GG	GG	GG	GG	GG	GG	GG	GG	GG	GG	GG	GG	GG	GG	GG	GC	GG	GG	GG	GG	GG	GC	GG	GC	GG	GG	GG	GG	GC	GG	GG	GG	GG	GC	GG	GG
194289	C/T	Unknown	15931649	+	CC	CC	CC	CC	CC	CC	CC	CC	CT	CC	CC	CC	CC	CC	CC	CC	CC	CC	CC	CC	CC	CC	CC	CC	CC	CC	CC	CC	CC	CC	CC	CC	CC	CT	CC	CC	CC	CC	CC	CC	CC	CC	CC	CC	CC
194289	G/A	Unknown	15931651	+	GG	GG	GG	GG	GA	GG	GA	GG	GG	GG	GG	GG	GG	GG	GG	GG	GG	GG	GG	GG	GG	GG	GG	GG	GG	GG	GG	GG	GG	GG	GG	GG	GG	GG	GG	GG	GG	GG	GG	GA	GG	GG	GG	GG	GG
195367	C/A	Unknown	16020055	+	CC	CC	CC	CC	CC	CC	CC	CC	CC	CC	CC	CC	CC	CC	CC	CC	CC	CC	CC	CC	CC	CC	CC	CC	CC	CC	CC	CC	CA	CC	CC	CC	CC	CC	CC	CC	CC	CC	CC	CC	CC	CA	CC	CC	CC
195367	C/A	Unknown	16020067	+	CC	CC	CC	CC	CC	CC	CC	CC	CA	CC	CC	CC	CC	CC	CC	CC	CC	CC	CC	CC	CC	CC	CA	CC	CC	CC	CC	CC	CC	CC	CC	CC	CC	CC	CC	CC	CA	CC	CC	CC	CC	CC	CC	CC	CC
195476	G/T	Unknown	16028974	+	GG	GG	GG	GG	GG	GG	GG	GG	GG	GG	GG	GG	GG	GG	GG	GG	GG	GG	GG	GG	GG	GG	GG	GT	GG	GG	GG	GG	GG	GG	GG	GG	GG	GG	GG	GG	GG	GG	GT	GG	GG	GG	GG	GG	GG
195476	C/T	Unknown	16028977	+	CC	CC	CC	CC	CC	CC	CC	CC	CC	CC	CC	CC	CC	CC	CC	CC	CC	CC	CC	CC	CC	CC	CC	CC	CC	CC	CT	CC	CC	CC	CC	CC	CC	CC	CC	CC	CC	CC	CC	CC	CC	CC	CC	CC	CC
195877	G/A	Unknown	16061896	+	GG	GG	GG	GA	GG	GG	GG	GG	GG	GG	GG	GG	GG	GG	GG	GA	GA	GG	GG	GG	GG	GG	GG	GG	GG	GG	GA	GG	GG	GA	GG	GA	GG	GG	GG	GG	GG	GG	GG	GG	GG	GA	GA	GG	GG
197142	C/T	Unknown	16165580	+	CC	CC	CC	CC	CC	CC	CC	CC	CC	CT	CC	CC	CC	CC	CC	CC	CC	CC	CC	CC	CC	CC	CC	CC	CC	CC	CC	CC	CC	CC	CC	CC	CC	CC	CC	CC	CC	CC	CC	CC	CC	CC	CC	CC	CC
197250	T/C	Unknown	16174428	+	TT	TT	TT	TT	TT	TT	TT	TC	TT	TT	TT	TT	TC	TT	TT	TT	TT	TT	TT	TT	TT	TT	TT	TC	TT	TT	TT	TT	TT	TT	TT	TT	TT	TT	TT	TT	TT	TC	TC	TT	TT	TT	TT	TT	TT
197480	C/T	Unknown	16193293	+	CC	CC	CT	CC	CC	CT	CC	CT	CC	CC	CC	CC	CC	CC	CC	CC	CC	CC	CT	CC	CC	CC	CC	CC	CT	CC	CT	CC	CT	CT	CC	CC	CC	CC	CC	CC	CT	CC	CC	CC	CC	CC	CT	CC	CC
197746	G/C	Unknown	16215130	+	GC	GC	GG	GC	GC	GC	GC	GC	GC	GC	GC	GC	GC	GC	GC	GG	GC	GC	GC	GG	GC	GC	GC	GC	GC	GC	GC	GC	GC	GC	GC	GC	GG	GC	GC	GC	GC	GC	GC	GC	GC	GC	GC	GC	GC
198093	G/T	Unknown	16243583	+	GG	GG	GG	GG	GG	GG	GG	GG	GG	GG	GG	GG	GG	GG	GT	GG	GG	GG	GG	GG	GG	GG	GG	GG	GT	GG	GG	GG	GG	GG	GG	GG	GG	GG	GG	GG	GG	GG	GG	GG	GG	GG	GG	GG	GG
198410	A/G	Unknown	16269568	+	AA	AA	AA	AA	AA	AA	AA	AA	AA	AA	AA	AA	AG	AA	AG	AA	AA	AA	AA	AA	AA	AA	AA	AA	AG	AA	AA	AA	AA	AA	AA	AA	AA	AA	AA	AA	AA	AA	AA	AA	AA	AG	AA	AA	AA
198410	C/T	Unknown	16269570	+	CC	CT	CT	CT	CT	CC	CC	CC	CT	CT	CT	CT	CT	CT	CC	CT	CC	CT	CT	CT	CT	CT	CT	CT	CC	CT	CT	CT	CT	CT	CT	CC	CT	CC	CT	CT	CT	CT	CT	CC	CC	CT	CT	CT	CT
198982	C/G	Unknown	16316449	+	CC	CC	CC	CC	CC	CC	CC	CC	CC	CC	CC	CC	CC	CC	CC	CC	CG	CC	CC	CC	CC	CC	CC	CC	CC	CC	CC	CC	CC	CG	CG	CC	CC	CC	CC	CC	CC	CC	CG	CC	CC	CC	CG	CC	CC
199670	C/T	Unknown	16372874	+	CT	CC	CC	CC	CC	CC	CT	CC	CC	CC	CC	CC	CC	CC	CC	CC	CC	CC	CC	CC	CC	CC	CC	CC	CC	CC	CC	CC	CC	CC	CC	CC	CC	CC	CC	CC	CC	CC	CC	CC	CC	CC	CC	CC	CC
200191	G/T	Unknown	16415597	+	GT	GT	GT	GT	GG	GT	GT	GT	GT	GT	GT	GG	GT	GT	GT	GT	GT	GT	GT	GT	GT	GG	GT	GT	GG	GT	GT	GT	GT	GT	GT	GG	GT	GT	GT	GT	GT	GG	GT	GT	GT	GT	GG	GT	GT
200191	C/T	Unknown	16415615	+	CT	CC	CT	CC	CT	CT	CC	CC	CT	CT	CC	CT	CT	CT	CC	CC	CT	CT	CT	CT	CC	CC	CC	CC	CC	CC	CC	CC	CT	CC	CT	CT	CC	CC	CT	CC	CC	CT	CT	CT	CC	CC	CT	CC	CC
200228	G/A	Unknown	16418627	+	GA	GG	GG	GG	GG	GA	GA	GG	GA	GG	GG	GG	GG	GG	GG	GG	GA	GG	GG	GG	GG	GG	GG	GA	GA	GG	GG	GG	GG	GA	GG	GG	GG	GG	GG	GG	GG	GG	GA	GG	GA	GA	GG	GG	GG
200309	C/G	Unknown	16425309	+	CC	CC	CC	CC	CC	CC	CC	CC	CC	CC	CC	CC	CC	CC	CC	CC	CC	CC	CC	CC	CC	CC	CC	CC	CC	CC	CG	CG	CC	CC	CC	CC	CC	CC	CC	CC	CC	CC	CG	CC	CC	CC	CC	CC	CC
201243	C/A	Unknown	16501856	+	CC	CC	CC	CC	CC	CC	CC	CC	CC	CC	CC	CC	CC	CC	CC	CC	CC	CC	CC	CC	CC	CC	CC	CA	CC	CC	CC	CA	CC	CC	CC	CC	CC	CC	CC	CC	CC	CC	CC	CC	CC	CC	CC	CC	CC
201243	G/C	Unknown	16501885	+	GC	GG	GG	GG	GG	GG	GG	GC	GG	GG	GG	GG	GG	GG	GG	GG	GG	GG	GG	GG	GG	GG	GG	GC	GG	GC	GG	GC	GG	GG	GG	GG	GG	GG	GG	GG	GG	GG	GG	GG	GG	GG	GG	GG	GG
201587	G/A	Unknown	16530059	+	GG	GG	GG	GA	GG	GG	GG	GG	GG	GG	GG	GG	GG	GG	GG	GG	GG	GG	GG	GG	GG	GG	GG	GG	GG	GG	GG	GG	GG	GG	GA	GG	GG	GG	GG	GG	GG	GG	GG	GG	GG	GG	GG	GG	GG
201636	C/G	Unknown	16534077	+	CG	CG	CG	CG	CG	CC	CG	CG	CG	CG	CG	CC	CG	CG	CG	CG	CG	CG	CG	CG	CG	CG	CG	CG	CG	CG	CG	CG	CG	CG	CG	CG	CG	CG	CG	CG	CC	CG	CG	CG	CG	CG	CG	CG	CG
202430	T/G	Unknown	16599208	+	TT	TT	TT	TT	TT	TT	TG	TT	TT	TT	TT	TT	TG	TT	TT	TT	TT	TT	TG	TT	TT	TT	TT	TT	TT	TT	TT	TT	TT	TG	TG	TT	TT	TT	TT	TT	TT	TT	TT	TT	TT	TT	TG	TT	TT
202748	G/T	Unknown	16625282	+	GG	GG	GG	GG	GG	GT	GG	GG	GG	GG	GG	GG	GG	GG	GG	GG	GG	GG	GG	GG	GT	GT	GG	GG	GG	GG	GG	GG	GG	GT	GG	GG	GG	GG	GG	GG	GG	GG	GG	GT	GG	GG	GG	GG	GG
203331	G/A	Unknown	16673069	+	GG	GG	GG	GG	GG	GA	GG	GA	GA	GG	GG	GA	GG	GG	GG	GG	GG	GG	GA	GG	GG	GG	GG	GG	GG	GA	GG	GG	GG	GA	GG	GG	GG	GG	GG	GG	GG	GG	GG	GG	GG	GG	GA	GG	GA
204145	G/A	Unknown	16739824	+	GA	GA	GA	GA	GA	GA	GA	GA	GA	GA	GA	GA	GA	GA	GA	GA	GA	GA	GA	GA	GA	GG	GG	GA	GA	GA	GA	GA	GA	GA	GA	GA	GG	GA	GA	GA	GA	GA	GA	GA	GG	GA	GA	GA	GA
204883	C/T	Unknown	16800343	+	CC	CC	CC	CC	CC	CC	CC	CC	CC	CC	CC	CC	CC	CC	CC	CC	CC	CC	CC	CC	CC	CC	CC	CC	CC	CC	CC	CC	CC	CC	CC	CC	CC	CC	CC	CC	CC	CC	CC	CC	CC	CC	CC	CC	CC
205183	C/G	Unknown	16824944	+	CC	CC	CC	CC	CC	CC	CC	CC	CG	CC	CC	CC	CC	CC	CC	CC	CC	CC	CC	CC	CC	CC	CC	CC	CC	CC	CC	CC	CC	CG	CC	CC	CC	CC	CC	CC	CC	CG	CG	CC	CG	CG	CC	CC	CC
205183	T/A	Unknown	16824952	+	TA	TT	TA	TT	TA	TT	TT	TT	AA	TT	TA	TA	TT	TA	TA	TT	TA	TA	TA	TA	TT	TT	TT	TT	TT	TA	TA	TT	TT	TA	TT	TT	TA	TT	TA	TT	TT	TA	TA	TT	TT	TA	TT	TT	TT
205554	G/T	Unknown	16855380	+	GT	GT	GT	GT	GT	GT	GT	GT	GT	GT	GT	GT	GT	GT	GT	GT	GT	GT	GT	GT	GT	GT	GT	GT	GT	GT	GT	GT	GT	GT	GT	GT	GT	GG	GT	GT	GT	GT	GT	GT	GT	GT	GT	GT	GT
207167	A/G	Unknown	16987625	+	AG	AG	AG	AG	AG	AG	AG	AG	AG	AG	AG	AG	AG	AG	AG	AG	AG	AG	AG	AG	AG	AG	AG	AG	AG	AG	AG	AG	AG	AG	AG	AG	AG	AG	AG	AG	AG	AG	AG	AG	AG	AG	AG	AG	AG
207167	G/C	Unknown	16987628	+	GC	GC	GC	GC	GC	GC	GC	GC	GC	GC	GC	GC	GC	GC	GC	GC	GC	GC	GC	GC	GC	GC	GC	GC	GC	GC	GC	GC	GC	GC	GC	GC	GC	GC	GC	GC	GC	GC	GC	GC	GC	GC	GC	GC	GC
208576	G/T	Unknown	17103172	+	GG	GG	GG	GG	GG	GG	GG	GG	GG	GG	GG	GG	GG	GG	GG	GG	GT	GG	GG	GT	GG	GG	GG	GT	GG	GG	GG	GG	GG	GT	GG	GG	GG	GG	GG	GG	GG	GG	GT	GG	GG	GG	GG	GG	GG
209940	C/A	Unknown	17215040	+	CC	CC	CC	CC	CC	CC	CC	CC	CC	CA	CC	CC	CC	CC	CC	CC	CC	CC	CC	CC	CC	CC	CC	CC	CC	CC	CC	CC	CC	CC	CC	CC	CC	CC	CC	CC	CC	CC	CC	CC	CC	CC	CC	CC	CC
210228	T/G	Unknown	17238639	+	TG	TT	TT	TT	TT	TT	TT	TT	TT	TT	TT	TT	TT	TT	TT	TT	TT	TT	TT	TT	TT	TT	TT	TT	TT	TT	TT	TT	TT	TT	TT	TG	TG	TT	TT	TT	TT	TT	TG	TT	TT	TT	TT	TT	TT
210228	T/G	Unknown	17238641	+	TG	TT	TT	TT	TT	TT	TT	TT	TT	TT	TT	TT	TT	TT	TT	TT	TT	TT	TT	TT	TT	TT	TT	TT	TT	TT	TT	TT	TT	TT	TT	TG	TG	TT	TT	TT	TT	TT	TG	TT	TT	TT	TT	TT	TT
210578	C/T	Unknown	17267344	+	CT	CT	CT	CT	CT	CC	CT	CT	CT	CT	CT	CT	CT	CT	CT	CC	CT	CT	CT	CT	CT	CT	CT	CT	CT	CT	CT	CT	CT	CT	CT	CT	CT	CT	CT	CT	CT	CT	CT	CT	CT	CT	CT	CT	CT
210999	G/C	Unknown	17301847	+	GG	GG	GG	GG	GG	GG	GC	GG	GC	GG	GG	GG	GG	GG	GG	GG	GG	GG	GG	GG	GG	GG	GG	GG	GG	GG	GC	GG	GG	GG	GG	GG	GG	GG	GG	GG	GG	GG	GG	GG	GG	GG	GG	GG	GG
211492	C/T	Unknown	17342293	+	CC	CC	CC	CC	CC	CC	CC	CC	CC	CC	CT	CC	CC	CC	CT	CC	CC	CC	CC	CC	CC	CC	CC	CC	CC	CC	CT	CC	CC	CC	CC	CT	CC	CC	CC	CC	CC	CC	CC	CC	CC	CT	CC	CC	CC
211623	G/A	Unknown	17353027	+	GG	GA	GG	GG	GG	GG	GG	GG	GG	GG	GG	GG	GG	GG	GG	GG	GG	GG	GG	GG	GG	GG	GA	GG	GG	GG	GG	GG	GG	GG	GG	GG	GG	GG	GG	GG	GG	GG	GG	GG	GG	GG	GG	GG	GA
211706	C/G	Unknown	17359832	+	CC	CC	CC	CC	CC	CC	CG	CG	CC	CG	CG	CC	CC	CC	CC	CC	CC	CC	CG	CC	CC	CC	CC	CC	CC	CC	CG	CC	CC	CC	CC	CC	CC	CC	CC	CC	CC	CC	CC	CC	CC	CC	CC	CC	CC
212790	T/C	Unknown	17448745	+	TT	TT	TT	TT	TT	TT	TT	TT	TT	TT	TC	TT	TT	TT	TT	TT	TT	TT	TT	TT	TT	TT	TT	TC	TT	TT	TT	TT	TT	TT	TC	TT	TT	TC	TT	TT	TT	TT	TT	TT	TT	TT	TT	TT	TT
213073	C/T	Unknown	17471958	+	CT	CT	CT	CT	CC	CT	CT	CT	CT	CT	CT	CT	CT	CT	CT	CT	CT	CT	CT	CT	CT	CT	CT	CT	CT	CT	CT	CC	CT	CT	CT	CT	CT	CT	CT	CT	CT	CT	CT	CT	CT	CT	CT	CT	CT
213407	G/A	Unknown	17499301	+	GG	GG	GG	GG	GG	GG	GG	GG	GG	GA	GG	GA	GG	GG	GG	GG	GG	GG	GG	GG	GG	GG	GG	GG	GG	GA	GG	GG	GG	GG	GG	GG	GG	GG	GG	GG	GG	GG	GG	GG	GA	GA	GG	GG	GG
213546	G/C	Unknown	17510728	+	GG	GG	GG	GG	GC	GG	GG	GG	GG	GG	GG	GG	GG	GG	GG	GG	GG	GG	GG	GG	GG	GC	GG	GC	GG	GG	GG	GG	GG	GC	GG	GG	GG	GC	GG	GG	GG	GG	GG	GG	GC	GG	GG	GG	GG
213741	C/T	Unknown	17526721	+	CC	CC	CC	CC	CC	CC	CC	CT	CC	CC	CC	CC	CC	CC	CC	CC	CC	CC	CC	CC	CC	CC	CC	CC	CC	CC	CC	CC	CC	CC	CT	CT	CC	CC	CC	CC	CT	CC	CC	CC	CC	CC	CC	CC	CC
214175	C/A	Unknown	17562283	+	CA	CC	CA	CC	CC	CC	CA	CC	CC	CC	CC	CC	CC	CC	CC	CA	CC	CC	CC	CC	CC	CC	CC	CA	CC	CC	CA	CC	CC	CA	CC	CC	CC	CC	CC	CC	CC	CC	CC	CC	CA	CC	CC	CC	CC
214459	G/C	Unknown	17585573	+	GG	GG	GG	GG	GG	GG	GG	GG	GG	GG	GC	GG	GG	GG	GC	GG	GG	GC	GG	GG	GG	GG	GG	GG	GG	GG	GG	GG	GG	GG	GG	GG	GG	GC	GG	GG	GG	GC	GG	GG	GC	GG	GG	GG	GG
214459	G/A	Unknown	17585576	+	GG	GG	GG	GG	GG	GG	GA	GG	GA	GG	GG	GG	GG	GG	GG	GA	GG	GG	GG	GG	GG	GG	GG	GA	GG	GG	GA	GG	GG	GG	GG	GA	GG	GG	GG	GG	GG	GG	GG	GG	GG	GG	GG	GG	GA
214459	G/C	Unknown	17585597	+	GC	GG	GG	GG	GG	GG	GG	GG	GG	GC	GG	GG	GG	GG	GG	GG	GG	GG	GG	GG	GG	GG	GG	GC	GC	GG	GG	GG	GG	GG	GG	GG	GG	GG	GG	GG	GC	GG	GG	GC	GG	GG	GG	GG	GG
214484	C/G	Unknown	17587678	+	CG	CC	CC	CC	CC	CC	CG	CC	CC	CC	CC	CC	CC	CC	CC	CC	CC	CC	CC	CC	CC	CC	CC	CC	CC	CC	CC	CG	CC	CC	CC	CC	CC	CC	CC	CC	CC	CC	CC	CC	CC	CC	CC	CC	CC
214526	G/T	Unknown	17591110	+	GT	GT	GT	GG	GT	GT	GT	GG	GG	GT	GT	GT	GT	GG	GT	GT	GG	GT	GT	GT	GT	GT	GG	GG	GG	GT	GT	GG	GT	GG	GG	GG	GT	GT	GT	GT	GG	GT	GT	GT	GT	GT	GG	GT	GG
214581	C/A	Unknown	17595611	+	CA	CA	CA	CA	CA	CA	CA	CA	CA	CA	CA	CA	CA	CA	CC	CA	CA	CA	CA	CA	CA	CA	CA	CA	CA	CA	CC	CA	CC	CA	CA	CA	CA	CA	CA	CA	CA	CA	CA	CC	CA	CA	CA	CA	CA
214581	G/A	Unknown	17595619	+	GA	GG	GG	GG	GG	GG	GA	GG	GG	GG	GG	GG	GG	GG	GA	GG	GG	GG	GG	GG	GA	GG	GG	GG	GG	GG	GA	GG	GA	GG	GG	GG	GG	GG	GG	GG	GG	GG	GG	GA	GG	GA	GG	GG	GG
215065	G/A	Unknown	17635274	+	GG	GG	GG	GG	GG	GG	GG	GG	GG	GG	GG	GG	GG	GG	GG	GG	GA	GG	GG	GG	GG	GG	GG	GG	GG	GG	GG	GG	GG	GG	GG	GG	GG	GG	GG	GG	GG	GG	GG	GG	GG	GG	GG	GG	GG
215179	C/G	Unknown	17644648	+	CC	CC	CC	CC	CC	CC	CC	CC	CG	CC	CC	CC	CC	CC	CC	CC	CC	CC	CC	CC	CC	CC	CC	CC	CC	CC	CC	CC	CC	CC	CC	CC	CC	CC	CG	CC	CC	CC	CC	CC	CC	CC	CC	CC	CC
215479	G/A	Unknown	17669207	+	GG	GG	GG	GG	GG	GG	GG	GG	GG	GG	GG	GG	GG	GG	GG	GG	GG	GG	GG	GG	GG	GG	GG	GG	GG	GG	GG	GG	GG	GG	GG	GG	GG	GG	GG	GG	GG	GG	GG	GG	GG	GG	GG	GG	GG
215692	A/G	Unknown	17686683	+	AA	AG	AG	AG	AA	AG	AG	AG	AG	AA	AG	AG	AG	AG	AG	AG	AG	AA	AG	AG	AG	AG	AG	AG	AG	AG	AG	AA	AG	AG	AA	AG	AG	AG	AG	AG	AG	AG	AG	AG	AG	AG	AG	AG	AG
215784	C/A	Unknown	17694237	+	CA	CA	CA	CA	CA	CA	CA	CA	CA	CA	CA	CA	CA	CA	CA	CA	CC	CA	CA	CA	CA	CA	CA	CA	CA	CA	CA	CC	CA	CA	CA	CA	CA	CA	CA	CA	CA	CA	CA	CA	CA	CA	CA	CA	CA
216366	C/T	Unknown	17741977	+	CC	CC	CC	CC	CC	CC	CC	CC	CT	CC	CC	CC	CC	CC	CC	CC	CC	CC	CC	CC	CC	CC	CC	CC	CC	CC	CC	CC	CC	CC	CC	CC	CC	CC	CC	CC	CC	CC	CC	CC	CT	CT	CC	CC	CC
216366	G/A	Unknown	17742001	+	GG	GG	GG	GG	GG	GG	GA	GG	GG	GG	GG	GG	GG	GG	GG	GG	GG	GG	GG	GG	GG	GG	GG	GG	GG	GG	GG	GG	GG	GG	GG	GG	GG	GG	GG	GG	GG	GG	GG	GG	GG	GG	GG	GG	GG
216608	C/T	Unknown	17761809	+	CT	CT	CT	CT	CT	CT	CT	CT	CT	CT	CT	CT	CT	CT	CT	CT	CT	CT	CT	CT	CT	CT	CT	CT	CT	CT	CT	CT	CT	CT	CT	CT	CT	CT	CT	CT	CT	CT	CT	CT	CT	CC	CT	CT	CT
217094	T/C	Unknown	17801636	+	TT	TT	TT	TT	TT	TT	TT	TT	TT	TT	TT	TT	TT	TT	TT	TT	TC	TT	TT	TT	TT	TT	TT	TT	TT	TT	TT	TT	TC	TT	TC	TT	TT	TT	TT	TT	TT	TT	TT	TT	TT	TT	TT	TT	TT
217832	G/A	Unknown	17862180	+	GG	GG	GG	GG	GG	GG	GG	GG	GG	GG	GG	GG	GG	GG	GG	GG	GG	GG	GG	GG	GG	GG	GA	GG	GA	GG	GG	GG	GG	GG	GG	GA	GG	GG	GG	GG	GG	GG	GG	GG	GG	GG	GG	GG	GG
217864	C/T	Unknown	17864777	+	CC	CC	CC	CC	CC	CC	CC	CC	CC	CC	CC	CT	CT	CC	CC	CC	CC	CC	CC	CC	CC	CC	CC	CC	CC	CC	CC	CT	CC	CC	CC	CT	CC	CC	CC	CC	CC	CT	CC	CC	CT	CC	CC	CC	CC
218248	C/G	Unknown	17896277	+	CC	CC	CC	CC	CC	CC	CC	CC	CC	CC	CC	CC	CC	CC	CC	CG	CG	CC	CC	CC	CG	CC	CC	CC	CC	CC	CG	CC	CC	CG	CC	CG	CC	CC	CC	CC	CC	CC	CC	CC	CC	CG	CG	CC	CC
218248	T/A	Unknown	17896290	+	TT	TT	TT	TT	TT	TA	TT	TT	TT	TT	TT	TT	TT	TT	TT	TT	TT	TT	TT	TT	TT	TA	TT	TT	TT	TT	TT	TA	TT	TT	TA	TT	TT	TT	TT	TT	TT	TT	TT	TT	TT	TT	TT	TT	TA
218397	G/A	Unknown	17908502	+	GG	GG	GG	GG	GA	GG	GG	GG	GG	GG	GA	GG	GG	GG	GG	GG	GG	GG	GG	GG	GG	GG	GA	GG	GG	GG	GG	GG	GG	GG	GG	GA	GG	GG	GG	GG	GG	GG	GG	GG	GG	GA	GA	GG	GG
218969	A/C	Unknown	17955389	+	AC	AC	AC	AC	AC	AC	AC	AC	AC	AC	AC	AA	AC	AC	AA	AC	AC	AC	AC	AC	AC	AC	AC	AC	AC	AC	AC	AC	AC	AC	AC	AC	AA	AC	AC	AC	AC	AC	AC	AC	AC	AA	AC	AC	AC
218969	C/G	Unknown	17955404	+	CG	CG	CG	CG	CG	CG	CG	CG	CG	CG	CG	CC	CG	CG	CC	CG	CG	CG	CG	CG	CG	CG	CG	CG	CG	CG	CG	CG	CG	CG	CG	CG	CG	CG	CG	CG	CG	CG	CG	CG	CG	CC	CG	CG	CG
219379	G/A	Unknown	17989018	+	GG	GG	GG	GG	GG	GG	GG	GG	GG	GG	GG	GG	GG	GG	GG	GG	GG	GG	GG	GG	GG	GG	GG	GG	GG	GG	GA	GG	GG	GG	GG	GG	GG	GG	GG	GG	GG	GG	GA	GG	GG	GG	GG	GG	GG
219548	C/A	Unknown	18002872	+	CC	CC	CC	CC	CA	CC	CC	CC	CC	CC	CC	CA	CC	CC	CA	CC	CC	CC	CC	CC	CC	CC	CA	CC	CA	CC	CC	CC	CA	CC	CC	CA	CC	CC	CC	CC	CC	CA	CC	CC	CC	CC	CA	CC	CC
219548	G/A	Unknown	18002887	+	GA	GA	GA	GA	GA	GA	GA	GA	GA	GA	GA	GA	GA	GA	GA	GA	GA	GA	GA	GA	GA	GA	GA	GG	GA	GA	GA	GA	GA	GG	GA	GA	GA	GA	GA	GA	GG	GA	GA	GA	GG	GA	GA	GA	GA
219772	T/C	Unknown	18021261	+	TT	TT	TT	TC	TT	TT	TT	TC	TT	TT	TT	TT	TT	TT	TT	TT	TT	TT	TT	TT	TT	TC	TT	TC	TT	TT	TT	TT	TT	TT	TT	TT	TT	TT	TT	TT	TT	TT	TT	TC	TC	TT	TT	TT	TC
220234	C/T	Unknown	18059140	+	CT	CC	CC	CC	CC	CC	CC	CC	CC	CC	CC	CC	CC	CC	CC	CC	CC	CC	CC	CC	CC	CC	CT	CC	CC	CC	CC	CC	CC	CC	CC	CC	CC	CC	CC	CC	CC	CC	CC	CC	CC	CC	CC	CC	CC
220234	G/T	Unknown	18059150	+	GG	GG	GG	GG	GG	GG	GG	GG	GT	GG	GG	GG	GG	GG	GG	GG	GG	GG	GG	GG	GG	GG	GT	GG	GG	GG	GG	GG	GG	GG	GG	GG	GG	GT	GG	GG	GG	GG	GG	GG	GG	GG	GG	GG	GG
220350	C/T	Unknown	18068655	+	CC	CC	CC	CC	CC	CC	CC	CT	CC	CC	CC	CC	CC	CC	CC	CC	CC	CC	CC	CC	CC	CC	CC	CC	CC	CC	CC	CC	CC	CC	CC	CC	CC	CC	CC	CC	CC	CC	CC	CC	CC	CT	CC	CC	CC
220993	A/T	Unknown	18121359	+	AT	AA	AT	AA	AT	AT	AT	AA	AA	AA	AT	AT	AT	AT	AT	AT	AT	AT	AT	AT	AT	AT	AT	AT	AT	AT	AT	AT	AA	AT	AA	AT	AT	AT	AA	AT	AT	AT	AT	AT	AT	AT	AT	AT	AA
221287	A/T	Unknown	18145478	+	AA	AA	AA	AA	AA	AA	AA	AA	AA	AA	AA	AA	AA	AA	AA	AA	AA	AA	AA	AA	AA	AA	AA	AA	AA	AA	AA	AA	AA	AA	AA	AA	AA	AT	AA	AA	AA	AA	AA	AT	AA	AA	AA	AA	AA
221287	C/T	Unknown	18145513	+	CC	CC	CC	CC	CC	CC	CC	CC	CC	CC	CC	CC	CC	CC	CC	CC	CC	CC	CC	CC	CC	CC	CC	CC	CC	CC	CC	CC	CC	CC	CC	CC	CC	CC	CC	CC	CC	CC	CC	CC	CC	CC	CC	CC	CC
222480	C/G	Unknown	18243289	+	CG	CC	CC	CC	CC	CC	CC	CG	CC	CC	CC	CC	CC	CC	CC	CC	CC	CC	CC	CC	CC	CC	CC	CC	CG	CC	CG	CC	CC	CC	CC	CC	CG	CC	CC	CC	CC	CC	CC	CC	CC	CC	CG	CC	CC
223385	G/C	Unknown	18317519	+	GG	GG	GG	GG	GG	GG	GG	GC	GG	GG	GG	GG	GC	GG	GC	GG	GG	GG	GG	GG	GG	GC	GG	GG	GG	GG	GG	GG	GG	GG	GG	GG	GG	GG	GG	GG	GG	GG	GG	GG	GG	GG	GC	GG	GC
224182	G/A	Unknown	18382871	+	GG	GG	GG	GG	GG	GA	GG	GG	GG	GG	GG	GG	GG	GG	GG	GG	GG	GG	GG	GG	GG	GG	GG	GG	GG	GG	GA	GG	GG	GG	GG	GG	GG	GG	GG	GG	GG	GG	GG	GA	GG	GG	GG	GG	GG
224447	C/A	Unknown	18404589	+	CC	CC	CC	CC	CC	CC	CC	CC	CC	CC	CC	CC	CC	CC	CC	CC	CC	CC	CC	CC	CC	CC	CC	CC	CC	CC	CA	CC	CC	CC	CC	CC	CC	CC	CC	CC	CC	CC	CC	CC	CC	CC	CC	CC	CC
224485	A/G	Unknown	18407702	+	AG	AG	AG	AG	AG	AG	AG	AG	AG	AG	AG	AG	AG	AG	AG	AG	AG	AG	AG	AG	AG	AG	AG	AG	AG	AG	AG	AG	AG	AG	AG	AG	AG	AG	AG	AG	AG	AG	AG	AG	AG	AG	AG	AG	AG
224485	C/T	Unknown	18407738	+	CC	CC	CC	CC	CC	CC	CT	CC	CC	CC	CC	CC	CC	CC	CT	CC	CC	CC	CC	CC	CC	CC	CC	CC	CC	CC	CC	CT	CC	CC	CC	CC	CC	CC	CC	CC	CC	CC	CC	CT	CC	CC	CC	CC	CT
224607	C/T	Unknown	18417724	+	CC	CC	CC	CC	CC	CT	CC	CC	CT	CC	CC	CC	CC	CC	CC	CC	CC	CC	CC	CC	CC	CC	CT	CC	CC	CC	CC	CC	CC	CC	CC	CC	CC	CT	CC	CC	CC	CC	CC	CC	CC	CC	CC	CC	CC
226742	T/A	Unknown	18592777	+	TT	TT	TT	TT	TT	TT	TA	TT	TT	TT	TT	TT	TT	TT	TA	TT	TT	TT	TT	TT	TT	TA	TT	TT	TT	TT	TT	TT	TT	TT	TT	TT	TT	TT	TT	TT	TT	TT	TT	TT	TT	TT	TT	TT	TT
226907	G/C	Unknown	18606304	+	GG	GG	GG	GG	GG	GG	GG	GG	GG	GG	GG	GG	GC	GG	GC	GG	GG	GG	GG	GG	GC	GG	GG	GG	GG	GG	GG	GG	GG	GG	GG	GG	GG	GC	GG	GG	GG	GG	GG	GG	GG	GG	GG	GG	GG
227706	C/T	Unknown	18671849	+	CC	CT	CC	CC	CC	CC	CC	CT	CT	CC	CC	CC	CC	CC	CT	CC	CC	CC	CC	CC	CC	CT	CC	CT	CC	CC	CC	CC	CC	CC	CC	CC	CC	CT	CC	CC	CC	CC	CC	CC	CC	CC	CC	CC	CC
227814	C/A	Unknown	18680710	+	CA	CC	CC	CC	CC	CC	CC	CC	CA	CA	CC	CC	CC	CC	CC	CC	CC	CC	CC	CC	CC	CC	CC	CC	CC	CC	CC	CC	CC	CC	CC	CC	CC	CC	CC	CC	CC	CC	CC	CC	CC	CC	CC	CC	CC
227840	A/G	Unknown	18682810	+	AG	AG	AG	AG	AG	AG	AG	AG	AG	AG	AG	AA	AA	AG	AG	AA	AG	AG	AG	AG	AG	AG	AG	AG	AA	AG	AG	AG	AG	AG	AA	AA	AG	AG	AG	AG	AG	AA	AG	AG	AG	AG	AG	AG	AG
228404	G/C	Unknown	18729078	+	GC	GC	GC	GC	GC	GC	GC	GC	GC	GC	GC	GC	GC	GC	GC	GC	GC	GC	GC	GC	GC	GC	GC	GC	GC	GC	GC	GC	GC	GC	GC	GC	GC	GC	GC	GC	GC	GC	GC	GC	GC	GC	GC	GC	GC
228995	C/T	Unknown	18777574	+	CC	CC	CC	CC	CC	CC	CT	CC	CC	CC	CC	CC	CC	CC	CC	CC	CT	CC	CC	CC	CC	CT	CC	CC	CC	CC	CC	CC	CC	CC	CC	CC	CC	CC	CC	CC	CC	CC	CC	CC	CC	CC	CC	CC	CT
229418	C/T	Unknown	18812207	+	CC	CC	CC	CT	CC	CC	CC	CC	CC	CC	CC	CC	CT	CC	CT	CC	CC	CC	CC	CC	CC	CC	CC	CC	CC	CC	CT	CC	CC	CC	CC	CC	CC	CC	CC	CC	CC	CC	CT	CC	CC	CC	CC	CC	CC
231668	C/T	Unknown	18996748	+	CT	CC	CC	CC	CC	CC	CC	CC	CC	CC	CC	CC	CC	CT	CC	CC	CC	CC	CC	CC	CC	CC	CC	CC	CC	CC	CC	CC	CC	CC	CC	CC	CC	CC	CT	CC	CC	CC	CC	CC	CC	CC	CC	CC	CC
232329	G/A	Unknown	19050904	+	GG	GG	GG	GG	GG	GG	GG	GG	GG	GG	GG	GG	GG	GG	GG	GG	GG	GG	GG	GG	GG	GG	GG	GG	GG	GG	GA	GG	GG	GG	GG	GG	GG	GG	GG	GG	GG	GG	GG	GG	GG	GG	GG	GG	GG
234219	G/A	Unknown	19205904	+	GG	GG	GG	GA	GA	GG	GG	GG	GA	GG	GG	GG	GG	GG	GG	GG	GG	GG	GG	GG	GG	GG	GG	GG	GG	GG	GG	GG	GG	GG	GG	GG	GG	GG	GG	GG	GG	GG	GA	GA	GA	GG	GA	GG	GG
234219	C/T	Unknown	19205905	+	CT	CC	CT	CT	CT	CT	CT	CT	CT	CT	CT	CC	CC	CT	CC	CT	CT	CT	CT	CT	CT	CC	CT	CT	CT	CT	CT	CT	CT	CT	CT	CT	CC	CT	CT	CT	CT	CT	CT	CT	CT	CT	CT	CT	CT
235012	C/T	Unknown	19270910	+	CT	CC	CC	CC	CC	CC	CC	CT	CC	CT	CT	CC	CC	CC	CC	CC	CC	CC	CC	CC	CC	CT	CC	CC	CC	CC	CC	CT	CC	CC	CC	CC	CC	CC	CC	CC	CC	CC	CC	CC	CC	CC	CT	CC	CC
235012	A/G	Unknown	19270941	+	AA	AA	AA	AA	AA	AA	AA	AA	AA	AG	AA	AA	AA	AA	AA	AA	AA	AG	AA	AA	AA	AG	AA	AA	AG	AA	AA	AG	AA	AA	AA	AG	AA	AA	AA	AA	AA	AA	AA	AA	AA	AA	AA	AA	AA
235565	A/G	Unknown	19316258	+	AA	AA	AA	AA	AA	AA	AA	AA	AA	AA	AA	AA	AA	AA	AA	AA	AA	AA	AA	AA	AA	AA	AA	AA	AA	AA	AG	AA	AA	AG	AA	AA	AA	AA	AA	AA	AA	AA	AA	AA	AA	AA	AA	AA	AA
235621	C/T	Unknown	19320862	+	CT	CC	CC	CC	CC	CC	CC	CT	CC	CC	CC	CC	CC	CC	CC	CC	CC	CC	CC	CC	CC	CC	CC	CC	CT	CC	CC	CC	CC	CC	CC	CT	CC	CC	CC	CC	CC	CT	CC	CC	CC	CC	CC	CC	CT
235827	T/C	Unknown	19337741	+	TC	TC	TC	TC	TC	TC	TC	TC	TC	TC	TC	TC	TT	TC	TC	TC	TC	TC	TC	TC	TC	TT	TC	TC	TC	TC	TT	TC	TC	TT	TC	TC	TC	TC	TC	TC	TC	TC	TC	TC	TC	TC	TC	TC	TC
235827	G/A	Unknown	19337757	+	GA	GA	GA	GA	GA	GA	GA	GA	GA	GA	GA	GA	GG	GA	GA	GA	GA	GA	GA	GA	GA	GG	GA	GA	GA	AA	GG	GA	GA	GG	GA	GA	GA	GA	GA	GA	GA	GA	GA	GA	GA	GA	GA	GA	GA
236943	A/G	Unknown	19429260	+	AA	AA	AA	AG	AA	AA	AA	AA	AA	AA	AA	AA	AA	AA	AA	AA	AA	AA	AA	AA	AA	AA	AA	AA	AA	AA	AG	AG	AA	AA	AA	AA	AA	AA	AA	AA	AA	AA	AA	AA	AA	AA	AA	AA	AA
237581	C/T	Unknown	19481574	+	CC	CT	CT	CC	CC	CC	CT	CT	CC	CC	CC	CC	CT	CC	CC	CC	CT	CC	CC	CC	CC	CT	CT	CC	CC	CT	CT	CC	CT	CC	CT	CC	CT	CC	CT	CT	CC	CC	CC	CC	CT	CC	CC	CT	CC
237581	A/G	Unknown	19481584	+	AG	AG	AG	AG	AG	AG	AG	AG	AG	AG	AG	AG	AG	AG	AG	AG	AA	AG	AG	AG	AG	AG	AG	AG	AG	AG	AA	AG	AG	AG	AG	AG	AG	AG	AG	AG	AG	AG	AG	AG	AG	AG	AG	AG	AG
237686	C/T	Unknown	19490210	+	CC	CC	CC	CC	CC	CC	CC	CC	CC	CC	CC	CT	CC	CC	CC	CT	CC	CC	CC	CC	CC	CC	CC	CC	CC	CC	CC	CC	CC	CC	CC	CC	CC	CC	CC	CC	CC	CC	CC	CT	CC	CC	CC	CC	CC
237847	G/T	Unknown	19503408	+	GG	GG	GG	GG	GG	GG	GG	GG	GG	GG	GG	GG	GG	GG	GG	GG	GG	GG	GG	GG	GG	GG	GG	GG	GG	GG	GG	GG	GG	GT	GG	GG	GG	GG	GG	GG	GG	GG	GG	GG	GG	GG	GG	GG	GG
238326	C/G	Unknown	19542658	+	CC	CC	CC	CC	CC	CC	CC	CC	CC	CC	CC	CC	CC	CC	CC	CC	CC	CC	CC	CC	CC	CG	CC	CC	CC	CC	CC	CC	CC	CC	CC	CG	CC	CC	CG	CC	CC	CC	CC	CC	CC	CC	CC	CC	CC
239099	C/T	Unknown	19606045	+	CC	CC	CC	CC	CC	CC	CC	CC	CC	CC	CC	CC	CC	CC	CC	CC	CC	CT	CC	CC	CC	CC	CC	CC	CC	CC	CC	CC	CC	CC	CC	CC	CC	CC	CC	CC	CC	CC	CT	CC	CC	CC	CC	CC	CC
239099	G/A	Unknown	19606046	+	GG	GG	GG	GG	GG	GA	GG	GG	GA	GG	GG	GG	GG	GG	GG	GG	GG	GG	GG	GG	GG	GG	GG	GG	GG	GG	GG	GG	GA	GA	GA	GG	GG	GG	GG	GG	GG	GG	GG	GG	GG	GG	GG	GG	GA
239581	C/G	Unknown	19645602	+	CC	CC	CC	CC	CC	CC	CC	CC	CG	CC	CC	CC	CC	CC	CC	CC	CC	CC	CC	CC	CC	CG	CC	CC	CC	CC	CC	CC	CC	CC	CC	CC	CC	CC	CC	CC	CC	CC	CC	CC	CC	CC	CC	CC	CC
240024	C/G	Unknown	19681912	+	CC	CC	CC	CC	CG	CC	CC	CC	CC	CG	CC	CC	CC	CC	CC	CC	CC	CG	CC	CC	CG	CC	CC	CC	CC	CC	CC	CC	CC	CC	CC	CC	CC	CC	CC	CC	CC	CC	CC	CC	CC	CC	CC	CC	CC
240571	A/G	Unknown	19726749	+	AG	AG	AG	AG	AG	AG	AG	AG	AG	AG	AG	AG	AG	AG	AG	AG	AG	AG	AG	AG	AG	AG	AG	AG	AG	AG	AG	AG	AG	AG	AG	AG	AG	AG	AG	AG	AG	AG	AG	AA	AG	AG	AG	AG	AG
240571	C/A	Unknown	19726770	+	CA	CC	CC	CC	CC	CC	CC	CC	CC	CC	CC	CC	CC	CC	CC	CC	CC	CC	CC	CC	CC	CC	CC	CC	CC	CC	CC	CA	CC	CC	CC	CA	CC	CC	CA	CC	CC	CC	CC	CC	CC	CC	CC	CC	CC
240659	C/T	Unknown	19733974	+	CC	CC	CC	CC	CC	CC	CC	CC	CC	CC	CC	CC	CC	CC	CC	CC	CC	CC	CC	CC	CC	CC	CC	CC	CC	CC	CC	CT	CT	CC	CC	CC	CC	CT	CC	CC	CC	CC	CC	CC	CC	CC	CC	CC	CC
241505	C/T	Unknown	19803345	+	CC	CC	CC	CC	CT	CC	CC	CC	CC	CC	CC	CC	CC	CC	CC	CT	CC	CC	CC	CC	CC	CC	CC	CC	CC	CC	CT	CC	CC	CC	CC	CC	CC	CC	CC	CC	CC	CC	CC	CC	CC	CC	CC	CC	CC
241615	C/T	Unknown	19812370	+	CC	CC	CC	CC	CC	CC	CC	CT	CT	CC	CC	CC	CT	CC	CC	CC	CC	CC	CC	CC	CC	CC	CC	CC	CC	CC	CC	CT	CC	CC	CC	CC	CC	CC	CC	CC	CC	CC	CT	CC	CC	CC	CC	CC	CC
241615	G/C	Unknown	19812371	+	GG	GG	GG	GC	GG	GG	GG	GG	GG	GG	GG	GG	GG	GG	GG	GG	GG	GG	GG	GG	GG	GG	GG	GG	GG	GG	GG	GG	GG	GG	GG	GG	GG	GG	GG	GG	GG	GG	GG	GG	GG	GG	GC	GG	GG
241615	T/C	Unknown	19812404	+	TT	TC	TT	TT	TT	TT	TT	TT	TT	TT	TT	TT	TT	TT	TT	TT	TT	TT	TT	TT	TT	TT	TT	TT	TT	TT	TT	TT	TT	TT	TT	TT	TT	TT	TT	TT	TT	TT	TT	TT	TT	TT	TT	TT	TT
242224	C/T	Unknown	19862305	+	CC	CC	CC	CC	CC	CC	CT	CC	CC	CC	CT	CC	CC	CC	CC	CC	CC	CC	CC	CC	CC	CC	CC	CC	CC	CC	CC	CT	CC	CC	CC	CC	CC	CC	CC	CC	CC	CC	CC	CC	CC	CC	CC	CC	CC
242224	G/A	Unknown	19862309	+	GG	GG	GG	GG	GG	GG	GA	GG	GG	GG	GA	GG	GG	GG	GG	GG	GG	GG	GG	GG	GG	GG	GG	GG	GG	GG	GG	GA	GG	GG	GG	GG	GG	GG	GG	GG	GG	GG	GG	GG	GG	GG	GG	GG	GG
242224	T/A	Unknown	19862314	+	TT	TT	TT	TT	TT	TA	TT	TT	TT	TT	TT	TT	TA	TT	TT	TT	TT	TT	TT	TT	TT	TT	TT	TT	TT	TT	TT	TT	TT	TT	TT	TT	TT	TT	TT	TT	TT	TT	TT	TT	TA	TT	TT	TT	TT
242660	G/T	Unknown	19898050	+	GG	GG	GG	GG	GG	GG	GT	GG	GT	GG	GG	GG	GG	GG	GG	GG	GG	GG	GG	GG	GG	GG	GG	GG	GG	GG	GG	GG	GT	GG	GT	GG	GG	GG	GG	GG	GG	GG	GG	GG	GG	GT	GG	GG	GG
242905	C/T	Unknown	19918159	+	CT	CT	CT	CT	CT	CT	CT	CC	CT	CT	CT	CT	CT	CT	CT	CT	CT	CT	CT	CT	CT	CT	CT	CT	CT	CC	CT	CT	CT	CT	CT	CT	CT	CT	CT	CT	CT	CT	CT	CT	CT	CT	CT	CT	CT
243180	C/T	Unknown	19940711	+	CC	CC	CC	CT	CC	CC	CC	CC	CC	CC	CC	CC	CC	CC	CC	CC	CC	CC	CC	CC	CC	CC	CC	CC	CC	CC	CC	CC	CC	CC	CC	CC	CC	CC	CC	CC	CC	CC	CC	CC	CC	CC	CC	CC	CC
243780	T/C	Unknown	19989886	+	TC	TC	TC	TC	TC	TC	TC	TC	TT	TC	TC	TC	TC	TC	TC	TC	TC	TC	TC	TC	TC	TC	TC	TC	TT	TC	TC	TC	CC	TC	TC	TC	TT	TC	TC	TC	TC	TC	TC	TC	TC	TC	TC	TC	TC
243780	C/A	Unknown	19989892	+	CC	CC	CC	CA	CA	CC	CC	CA	CC	CA	CC	CC	CA	CC	CC	CA	CC	CC	CC	CC	CC	CA	CC	CC	CC	CC	CC	CC	CA	CA	CA	CA	CC	CC	CC	CC	CA	CC	CA	CC	CC	CC	CC	CC	CC
244337	A/C	Unknown	20035575	+	AC	AC	AC	AC	AC	AC	AC	AC	AC	AC	AC	AA	AC	AC	AC	AC	AC	AC	AC	AC	AC	AC	AC	AC	AC	AC	AC	AA	AC	AC	AC	AC	AC	AC	AC	AC	AA	AC	AC	AC	AC	AC	AA	AC	AC
244659	G/A	Unknown	20061988	+	GG	GG	GG	GG	GG	GG	GG	GG	GA	GG	GG	GG	GG	GG	GG	GG	GG	GG	GG	GG	GG	GG	GG	GG	GG	GG	GA	GG	GG	GG	GG	GG	GG	GG	GA	GG	GG	GG	GG	GG	GG	GG	GG	GG	GG
245068	G/C	Unknown	20095529	+	GC	GC	GC	GC	GC	GC	GC	GC	GC	GC	GC	GC	GC	GC	GC	GC	GC	GC	GC	GC	GC	GC	GC	GC	GC	GC	GC	GC	GC	GC	GC	GC	GC	GC	GC	GC	GC	GC	GC	GC	GC	GC	GC	GC	GC
245530	C/T	Unknown	20133385	+	CT	CT	CT	CT	CT	CT	CT	CC	CC	CT	CT	CT	CT	CC	CT	CT	CT	CT	CT	CT	CT	CT	CT	CT	CC	CT	CC	CT	CT	CT	CT	CT	CT	CT	CC	CT	CT	CT	CT	CT	CT	CT	CC	CT	CT
245530	G/A	Unknown	20133430	+	GA	GA	GA	GA	GA	GA	GA	GG	GG	GA	GA	GA	GA	GG	GA	GA	GA	GA	GA	GA	GA	GA	GA	GA	GG	GA	GG	GA	GA	GA	GA	GA	GA	GA	GG	GA	GA	GA	GA	GA	GA	GA	GG	GA	GA
245854	C/T	Unknown	20160013	+	CT	CT	CT	CT	CT	CT	CT	CT	CT	CT	CT	CT	CT	CT	CT	CT	CT	CT	CT	CT	CT	CT	CT	CT	CT	CT	CT	CT	CT	CT	CT	CT	CT	CT	CT	CT	CC	CC	CT	CT	CT	CT	CT	CT	CT
246030	T/C	Unknown	20174396	+	TT	TT	TT	TT	TT	TC	TT	TT	TT	TT	TT	TT	TT	TT	TT	TT	TT	TT	TT	TT	TT	TT	TT	TT	TT	TT	TT	TT	TT	TT	TC	TT	TT	TT	TT	TT	TT	TT	TC	TT	TT	TT	TT	TT	TT
246518	C/A	Unknown	20214428	+	CA	CA	CC	CA	CC	CC	CC	CA	CA	CC	CC	CA	CA	CC	CC	CC	CA	CC	CC	CC	CC	CC	CC	CC	CC	CC	CA	CA	CA	CA	CA	CC	CC	CC	CC	CC	CA	CA	CC	CA	CC	CC	CA	CC	CA
247530	C/T	Unknown	20297414	+	CT	CC	CC	CC	CC	CC	CC	CC	CC	CC	CC	CC	CC	CC	CC	CC	CC	CC	CC	CC	CC	CC	CC	CT	CC	CC	CC	CT	CC	CT	CC	CC	CC	CT	CC	CC	CC	CC	CC	CC	CC	CT	CC	CC	CC
247564	G/A	Unknown	20300175	+	GG	GG	GG	GG	GA	GG	GG	GG	GG	GG	GG	GG	GA	GG	GG	GG	GG	GG	GG	GG	GG	GG	GG	GG	GG	GG	GG	GG	GG	GG	GG	GG	GG	GG	GG	GG	GG	GG	GG	GG	GG	GG	GA	GG	GG
247727	G/A	Unknown	20313542	+	GG	GG	GA	GA	GG	GA	GG	GA	GG	GG	GA	GA	GA	GA	GA	GG	GG	GA	GA	GA	GA	GG	GG	GG	GG	GA	GG	GG	GA	GG	GG	GG	GA	GA	GA	GA	GG	GG	GG	GG	GG	GG	GG	GA	GA
249502	C/T	Unknown	20459097	+	CC	CC	CC	CC	CC	CC	CC	CC	CC	CC	CC	CC	CC	CC	CT	CC	CC	CC	CC	CC	CC	CC	CC	CC	CC	CC	CC	CT	CC	CC	CC	CC	CC	CC	CC	CC	CC	CC	CC	CT	CC	CC	CC	CC	CC
249989	G/A	Unknown	20499044	+	GG	GG	GG	GG	GG	GG	GG	GG	GG	GG	GG	GG	GG	GG	GG	GG	GG	GG	GG	GG	GG	GG	GG	GG	GG	GG	GG	GG	GG	GG	GG	GG	GG	GG	GG	GG	GA	GG	GG	GG	GG	GG	GG	GG	GG
250227	G/A	Unknown	20518578	+	GA	GA	GA	GA	GA	GA	GA	GA	GA	GA	GA	GA	GA	GA	GA	GA	GA	GA	GA	GA	GA	GA	GA	GA	GA	GA	GA	GA	GA	GA	GA	GA	GA	GA	GA	GA	GA	GA	GA	GA	GA	GA	GA	GA	GA
250447	G/A	Unknown	20536578	+	GA	GG	GG	GG	GG	GG	GG	GG	GG	GG	GG	GG	GG	GG	GG	GG	GG	GG	GG	GG	GG	GG	GG	GG	GG	GG	GG	GG	GG	GG	GG	GG	GG	GG	GG	GG	GG	GG	GG	GG	GG	GG	GG	GG	GG
250565	C/G	Unknown	20546268	+	CC	CC	CC	CG	CC	CC	CC	CG	CC	CC	CC	CC	CC	CC	CC	CC	CC	CC	CC	CC	CC	CC	CG	CC	CG	CC	CC	CC	CC	CC	CC	CC	CC	CC	CC	CC	CC	CC	CC	CC	CC	CC	CC	CC	CC
250836	G/C	Unknown	20568483	+	GG	GG	GG	GG	GC	GG	GG	GG	GC	GG	GG	GG	GG	GG	GG	GG	GG	GG	GG	GG	GG	GG	GG	GG	GG	GC	GG	GG	GG	GG	GG	GG	GG	GC	GG	GG	GG	GG	GG	GG	GG	GG	GG	GG	GG
250836	G/A	Unknown	20568493	+	GG	GG	GG	GG	GA	GG	GG	GG	GA	GG	GG	GG	GG	GG	GG	GG	GG	GG	GG	GG	GG	GG	GG	GG	GG	GA	GG	GG	GG	GG	GG	GG	GG	GA	GG	GG	GG	GG	GG	GG	GG	GG	GG	GG	GG
250900	C/T	Unknown	20573737	+	CT	CT	CT	CT	CC	CT	CT	CT	CT	CT	CC	CT	CT	CC	CT	CT	CT	CT	CT	CT	CT	CT	CT	CT	CT	CT	CT	CT	CT	CT	CT	CC	CT	CC	CT	CT	CT	CT	CT	CT	CT	CT	CT	CT	CT
251024	C/T	Unknown	20583903	+	CT	CT	CT	CT	CT	CT	CT	CT	CT	CT	CT	CT	CC	CT	CT	CT	CT	CT	CT	CT	CT	CT	CT	CT	CT	CT	CT	CT	CT	CT	CT	CT	CT	CT	CT	CT	CT	CT	CT	CT	CT	CT	CT	CT	CC
251024	C/T	Unknown	20583923	+	CT	CT	CT	CT	CT	CT	CT	CT	CT	CT	CT	CT	CC	CT	CT	CT	CT	CT	CT	CT	CT	CT	CT	CT	CT	CT	CT	CT	CT	CT	CT	CT	CT	CT	CT	CT	CT	CT	CT	CT	CT	CT	CT	CT	CC
251669	G/T	Unknown	20636799	+	GG	GG	GG	GT	GG	GG	GG	GG	GG	GG	GG	GG	GG	GG	GG	GG	GG	GT	GG	GG	GT	GG	GG	GG	GG	GG	GG	GG	GG	GG	GG	GG	GG	GG	GG	GG	GT	GG	GG	GG	GG	GG	GG	GG	GT
252805	G/T	Unknown	20729944	+	GG	GG	GG	GG	GG	GT	GG	GG	GG	GG	GG	GG	GG	GG	GG	GG	GG	GG	GG	GG	GG	GG	GT	GG	GG	GG	GG	GG	GG	GG	GT	GG	GG	GG	GG	GG	GG	GG	GG	GG	GG	GG	GG	GT	GG
252992	A/T	Unknown	20745265	+	AT	AA	AT	AT	AT	AT	AT	AT	AT	AT	AT	AT	AT	AT	AT	AT	AA	AT	AT	AT	AT	AT	AT	AT	AT	AT	AA	AT	AT	AT	AT	AT	AT	AT	AT	AT	AT	AT	AT	AT	AT	AA	AA	AT	AT
252992	G/C	Unknown	20745316	+	GG	GC	GG	GG	GC	GG	GG	GG	GG	GC	GC	GG	GG	GG	GG	GC	GG	GG	GG	GG	GG	GG	GG	GG	GG	GG	GC	GG	GG	GC	GG	GG	GG	GG	GG	GG	GG	GC	GC	GG	GG	GC	GC	GG	GC
253193	G/A	Unknown	20761764	+	GG	GG	GG	GG	GG	GG	GG	GG	GG	GG	GG	GG	GG	GG	GG	GG	GG	GG	GG	GG	GG	GG	GG	GG	GG	GG	GA	GG	GG	GG	GG	GA	GG	GG	GG	GG	GG	GG	GG	GG	GG	GG	GG	GG	GG
253242	G/A	Unknown	20765796	+	GG	GG	GG	GG	GG	GG	GG	GG	GA	GG	GG	GG	GG	GG	GG	GG	GG	GG	GG	GG	GG	GG	GG	GG	GG	GG	GA	GG	GG	GA	GG	GG	GG	GG	GG	GG	GA	GG	GG	GG	GG	GG	GG	GG	GG
253268	C/T	Unknown	20767944	+	CC	CC	CC	CC	CC	CC	CC	CC	CC	CC	CC	CC	CC	CC	CC	CC	CC	CT	CC	CC	CC	CC	CC	CC	CC	CC	CC	CC	CT	CC	CC	CC	CC	CC	CC	CC	CC	CT	CC	CC	CC	CC	CC	CC	CT
254696	G/A	Unknown	20885041	+	GG	GG	GG	GG	GG	GG	GG	GG	GG	GG	GG	GG	GG	GG	GG	GG	GG	GG	GG	GG	GA	GG	GG	GG	GG	GG	GG	GG	GG	GA	GG	GG	GG	GG	GG	GG	GG	GG	GA	GG	GG	GG	GG	GG	GG
256198	C/A	Unknown	21008216	+	CA	CC	CC	CC	CC	CC	CC	CC	CC	CC	CC	CC	CC	CC	CC	CC	CC	CC	CC	CC	CC	CC	CC	CC	CC	CC	CC	CC	CC	CA	CC	CC	CA	CC	CC	CC	CC	CC	CC	CC	CC	CC	CC	CC	CC
256600	T/C	Unknown	21041152	+	TC	TC	TC	TC	TT	TC	TC	TC	TC	TT	TC	TC	TT	TC	TC	TC	TC	TC	TC	TC	TC	TC	TC	TC	TT	TT	TC	TC	TC	TC	TC	TC	TC	TC	TC	TC	TT	TC	TC	TC	TC	TC	TC	TC	TT
256600	A/C	Unknown	21041162	+	AC	AC	AC	AC	AA	AC	AC	AC	AC	AA	AC	AC	AA	AC	AC	AC	AC	AC	AC	AC	AC	AC	AC	AC	AA	AA	AC	AC	AC	AC	AC	AC	AC	AC	AC	AC	AA	AC	AC	AC	AC	AC	AC	AC	AA
263277	G/A	Unknown	21588654	+	GG	GG	GG	GG	GG	GG	GG	GG	GG	GA	GG	GG	GG	GG	GG	GG	GG	GG	GG	GG	GG	GG	GG	GG	GG	GG	GG	GG	GG	GG	GG	GG	GG	GG	GG	GG	GG	GG	GG	GG	GG	GG	GG	GG	GG
264864	G/A	Unknown	21718805	+	GG	GG	GG	GG	GG	GG	GG	GA	GG	GG	GG	GG	GG	GG	GG	GA	GG	GG	GG	GG	GG	GG	GG	GG	GA	GG	GG	GG	GG	GA	GG	GG	GG	GG	GA	GA	GG	GA	GG	GA	GA	GG	GG	GG	GG
264864	G/A	Unknown	21718806	+	GG	GG	GG	GG	GG	GG	GG	GA	GG	GG	GG	GG	GG	GG	GG	GA	GG	GG	GG	GG	GG	GG	GG	GG	GA	GG	GG	GG	GG	GA	GG	GG	GG	GG	GA	GA	GG	GA	GG	GA	GA	GG	GG	GG	GG
266127	C/T	Unknown	21822340	+	CC	CC	CC	CC	CC	CC	CT	CC	CC	CC	CT	CC	CC	CC	CC	CC	CC	CC	CC	CC	CC	CC	CC	CC	CC	CC	CC	CC	CT	CC	CC	CT	CC	CT	CC	CC	CC	CC	CC	CC	CC	CC	CC	CC	CC
271884	C/T	Unknown	22294432	+	CC	CC	CC	CC	CC	CC	CC	CC	CC	CC	CC	CC	CC	CC	CC	CC	CC	CT	CC	CC	CC	CC	CC	CC	CC	CC	CC	CC	CC	CC	CC	CC	CC	CC	CT	CC	CC	CC	CC	CT	CC	CC	CC	CC	CC
276780	G/A	Unknown	22695885	+	GG	GA	GG	GG	GG	GA	GG	GG	GG	GG	GG	GG	GA	GG	GG	GG	GG	GG	GG	GA	GG	GG	GG	GA	GG	GG	GG	GG	GG	GA	GG	GG	GG	GG	GG	GG	GG	GG	GG	GG	GG	GG	GG	GG	GG
276780	C/T	Unknown	22695909	+	CT	CC	CC	CC	CC	CC	CC	CC	CC	CC	CT	CC	CC	CC	CT	CC	CC	CC	CC	CC	CC	CC	CC	CC	CC	CC	CC	CC	CC	CC	CT	CC	CC	CC	CC	CC	CC	CC	CC	CC	CC	CT	CT	CC	CC
286545	T/C	Unknown	23496652	+	TT	TT	TT	TT	TT	TT	TT	TT	TT	TT	TT	TT	TT	TT	TT	TT	TT	TC	TT	TT	TT	TT	TC	TC	TC	TT	TT	TT	TT	TT	TC	TT	TT	TT	TT	TT	TT	TC	TT	TT	TT	TT	TT	TT	TT
291496	C/T	Unknown	23902640	+	TC	TC	TC	TC	TC	TC	TC	TC	TC	TC	TC	TC	TC	TC	TC	TC	TC	TC	TC	TC	TC	TC	TC	TC	TC	TC	TC	TC	TC	TC	TC	TC	TC	TC	TC	TC	TC	TC	TC	TC	TC	TC	TC	TC	TC
294224	A/C	Unknown	24126301	+	AA	AA	AA	AA	AA	AA	AC	AA	AA	AC	AA	AA	AA	AA	AA	AA	AA	AA	AA	AA	AA	AA	AA	AA	AA	AA	AA	AA	AA	AA	AA	AA	AA	AA	AA	AA	AA	AA	AA	AA	AA	AA	AA	AA	AA
294783	C/G	Unknown	24172153	+	CC	CC	CC	CC	CG	CC	CC	CG	CC	CC	CC	CC	CC	CC	CC	CG	CC	CC	CC	CC	CC	CC	CC	CC	CC	CC	CG	CC	CC	CC	CC	CC	CC	CC	CC	CC	CC	CC	CG	CC	CC	CG	CC	CC	CC
294783	G/A	Unknown	24172166	+	GG	GG	GG	GG	GA	GG	GG	GA	GG	GG	GG	GG	GG	GG	GG	GA	GG	GG	GG	GG	GG	GG	GG	GG	GG	GG	GA	GG	GG	GG	GG	GG	GG	GG	GG	GG	GG	GG	GA	GG	GG	GA	GG	GG	GG
301126	C/G	Unknown	24692275	+	CG	CG	CG	CG	CC	CG	CG	CG	CC	CC	CG	CG	CG	CC	CG	CC	CG	CG	CG	CG	CG	CC	CG	CG	CC	CG	CC	CG	CG	CC	CG	CG	CC	CG	CG	CG	CG	CG	CG	CG	CC	CG	CG	CG	CG
309078	C/T	Unknown	25344329	+	CC	CC	CC	CC	CC	CC	CC	CC	CC	CC	CC	CT	CC	CC	CC	CC	CC	CC	CC	CC	CC	CC	CC	CC	CC	CC	CC	CC	CC	CT	CC	CC	CC	CC	CC	CC	CC	CC	CC	CC	CC	CT	CC	CC	CC
321127	A/G	Unknown	26332394	+	AA	AA	AA	AA	AA	AA	AG	AA	AA	AA	AA	AA	AG	AA	AA	AG	AA	AA	AA	AA	AA	AA	AA	AA	AA	AA	AA	AA	AA	AA	AG	AA	AA	AG	AA	AA	AA	AA	AA	AA	AA	AA	AA	AA	AA
323202	G/A	Unknown	26502512	+	GA	GG	GG	GG	GG	GG	GG	GG	GG	GG	GG	GA	GG	GG	GG	GG	GG	GG	GG	GG	GG	GG	GG	GG	GG	GG	GG	GG	GG	GG	GG	GG	GG	GG	GG	GG	GG	GG	GG	GG	GG	GA	GG	GG	GG
324235	G/A	Unknown	26587231	+	GA	GG	GG	GG	GG	GG	GG	GG	GG	GG	GG	GG	GG	GG	GG	GG	GG	GG	GG	GG	GG	GG	GG	GG	GG	GG	GG	GG	GG	GG	GG	GG	GG	GG	GG	GG	GA	GG	GG	GG	GG	GG	GG	GG	GG
324694	G/A	Unknown	26624845	+	GG	GG	GG	GG	GG	GG	GG	GG	GG	GG	GG	GA	GG	GG	GG	GG	GG	GG	GG	GG	GG	GA	GA	GG	GG	GG	GG	GG	GG	GA	GG	GG	GG	GG	GG	GG	GG	GG	GG	GG	GG	GG	GG	GG	GG
324694	C/A	Unknown	26624846	+	CC	CC	CC	CC	CC	CC	CC	CC	CC	CC	CC	CA	CC	CC	CC	CC	CC	CC	CC	CC	CC	CA	CA	CC	CC	CC	CC	CC	CC	CA	CC	CC	CC	CC	CC	CC	CC	CC	CC	CC	CC	CC	CC	CC	CC
325684	C/T	Unknown	26706014	+	CT	CC	CC	CC	CC	CC	CT	CC	CC	CC	CC	CC	CC	CC	CC	CC	CC	CC	CC	CC	CC	CC	CC	CC	CC	CC	CC	CC	CC	CC	CC	CC	CC	CC	CC	CC	CC	CC	CC	CT	CC	CC	CT	CC	CC
326696	G/A	Unknown	26789018	+	GG	GG	GG	GG	GG	GG	GG	GG	GG	GG	GG	GG	GG	GG	GG	GG	GG	GG	GG	GG	GG	GG	GG	GG	GA	GG	GG	GG	GG	GA	GA	GG	GG	GG	GG	GG	GG	GG	GG	GA	GG	GA	GA	GG	GA
326696	G/A	Unknown	26789034	+	GA	GA	GA	GA	GA	GA	GA	GA	GA	GA	GA	GA	GA	GA	GA	GA	GA	GG	GA	GA	GA	GA	GA	GA	GA	GG	GA	GA	GA	GA	GA	GA	GA	GA	GA	GA	GA	GA	GA	GA	GA	GA	GA	GA	GA
327874	A/G	Unknown	26885641	+	AA	AA	AG	AA	AG	AA	AA	AA	AA	AG	AA	AG	AA	AG	AA	AG	AG	AA	AG	AG	AG	AG	AA	AA	AA	AG	AG	AG	AG	AA	AA	AA	AG	AA	AG	AA	AA	AA	AG	AA	AA	AG	AA	AG	AA
328013	C/G	Unknown	26897007	+	CC	CC	CC	CC	CC	CC	CC	CC	CG	CC	CC	CC	CC	CC	CC	CC	CC	CC	CC	CC	CC	CG	CC	CC	CC	CC	CC	CG	CC	CC	CC	CC	CC	CC	CG	CC	CC	CG	CC	CC	CC	CC	CC	CC	CC
328013	C/G	Unknown	26897010	+	CC	CC	CC	CC	CC	CC	CC	CC	CG	CC	CC	CC	CC	CC	CC	CC	CC	CC	CC	CC	CC	CG	CC	CC	CC	CC	CC	CG	CC	CC	CC	CC	CC	CC	CG	CC	CC	CG	CC	CC	CC	CC	CC	CC	CC
328225	C/G	Unknown	26914398	+	CC	CG	CG	CC	CG	CC	CG	CC	CC	CC	CG	CG	CG	CC	CC	CG	CG	CG	CG	CC	CG	CG	CC	CC	CC	CC	CC	CG	CG	CG	CC	CG	CC	CG	CG	CG	CC	CG	CC	CG	CC	CC	CC	CG	CC
328225	G/T	Unknown	26914406	+	GT	GG	GG	GG	GG	GG	GG	GG	GG	GG	GG	GG	GG	GG	GG	GG	GG	GG	GG	GG	GG	GG	GG	GG	GG	GG	GG	GG	GG	GG	GG	GT	GG	GG	GG	GG	GG	GG	GG	GG	GG	GG	GG	GG	GG
328264	A/G	Unknown	26917573	+	AG	AG	AG	AG	AA	AG	AG	AA	AG	AG	AG	AG	AG	AG	AG	AG	AG	AG	AG	AG	AG	AG	AG	AG	AG	AG	AG	AG	AG	AG	AG	AG	AG	AG	AG	AG	AG	AG	AA	AG	AG	AG	AG	AG	AG
328264	T/C	Unknown	26917611	+	TT	TT	TT	TT	TT	TT	TT	TT	TT	TT	TT	TT	TT	TT	TT	TT	TT	TT	TT	TT	TT	TT	TT	TT	TT	TT	TT	TT	TT	TT	TT	TC	TT	TT	TT	TT	TT	TC	TT	TT	TT	TT	TT	TT	TC
328665	G/T	Unknown	26950475	+	GG	GG	GG	GG	GG	GG	GG	GG	GG	GG	GG	GG	GG	GG	GG	GG	GG	GG	GG	GG	GG	GG	GG	GG	GG	GG	GG	GG	GG	GG	GG	GG	GG	GG	GG	GG	GG	GG	GG	GG	GG	GG	GG	GG	GG
328665	A/G	Unknown	26950483	+	AA	AA	AA	AA	AA	AA	AA	AA	AA	AA	AA	AA	AA	AA	AA	AA	AA	AA	AA	AA	AA	AA	AA	AA	AA	AA	AA	AA	AA	AA	AA	AA	AA	AA	AA	AA	AA	AA	AA	AA	AA	AA	AA	AA	AA
328738	C/A	Unknown	26956471	+	CC	CC	CC	CA	CC	CC	CC	CC	CC	CC	CC	CC	CC	CC	CA	CC	CC	CC	CC	CC	CC	CC	CC	CC	CA	CC	CC	CC	CC	CC	CC	CC	CC	CC	CC	CC	CC	CA	CC	CC	CC	CC	CA	CC	CC
328738	G/T	Unknown	26956472	+	GG	GT	GG	GG	GG	GG	GG	GG	GG	GT	GG	GG	GG	GG	GT	GT	GG	GG	GG	GG	GG	GG	GG	GG	GG	GG	GG	GG	GG	GG	GG	GG	GG	GG	GG	GG	GG	GG	GT	GG	GG	GT	GG	GG	GT
329745	A/G	Unknown	27039031	+	AA	AA	AA	AA	AA	AA	AA	AA	AA	AA	AA	AA	AA	AG	AA	AA	AA	AA	AA	AA	AA	AA	AA	AA	AA	AA	AA	AA	AA	AG	AA	AA	AA	AA	AA	AA	AA	AA	AG	AA	AA	AA	AA	AA	AA
329946	C/T	Unknown	27055499	+	CC	CC	CC	CC	CC	CC	CC	CC	CC	CC	CC	CC	CC	CC	CC	CC	CC	CC	CC	CC	CC	CT	CC	CT	CC	CC	CC	CC	CC	CC	CC	CC	CC	CC	CC	CC	CC	CC	CC	CC	CC	CC	CC	CC	CC
331014	T/C	Unknown	27143092	+	TT	TC	TC	TC	TC	TC	TC	TT	TC	TC	TC	TC	TT	TC	TC	TC	TC	TC	TC	TC	TC	TC	TC	TC	TC	TT	TC	TC	TC	TT	TC	TC	TC	TT	TC	TC	TC	TC	TC	TT	TT	TC	TC	TC	TC
332353	C/G	Unknown	27252872	+	CG	CG	CG	CG	CG	CG	CG	CG	CC	CG	CG	CG	CC	CG	CG	CG	CG	CC	CG	CG	CG	CG	CG	CC	CG	CG	CG	CC	CG	CC	CC	CC	CG	CC	CC	CC	CG	CC	CC	CG	CC	CC	CG	CG	CC
332486	C/G	Unknown	27263800	+	CC	CC	CC	CC	CC	CC	CG	CC	CC	CC	CC	CC	CC	CC	CC	CC	CC	CC	CC	CC	CC	CC	CC	CC	CC	CC	CC	CC	CG	CC	CC	CG	CC	CG	CC	CC	CC	CC	CC	CC	CC	CG	CC	CC	CC
332891	G/A	Unknown	27297012	+	GA	GG	GA	GG	GG	GG	GG	GA	GG	GA	GG	GG	GG	GG	GG	GG	GA	GG	GG	GG	GG	GG	GG	GG	GG	GG	GG	GG	GG	GG	GG	GG	GG	GG	GG	GG	GG	GG	GG	GG	GG	GG	GG	GG	GG
332918	G/C	Unknown	27299204	+	GG	GG	GG	GG	GG	GG	GG	GG	GG	GG	GG	GG	GG	GG	GG	GG	GG	GG	GG	GG	GG	GG	GG	GG	GC	GG	GG	GC	GG	GG	GG	GG	GG	GG	GG	GG	GG	GG	GG	GG	GG	GG	GG	GG	GG
333511	G/A	Unknown	27347855	+	GA	GA	GA	AA	GA	GA	GG	GA	GA	GA	GA	GA	GA	GA	GA	GA	GA	GA	GA	GA	GA	GA	GA	GG	GA	GA	GA	GA	GA	GA	GA	GA	GA	GA	GA	GA	GA	GA	GA	GA	GA	GA	GA	GA	GA
333511	G/A	Unknown	27347861	+	GA	GA	GA	AA	GA	GA	GG	GA	GA	GA	GA	GA	GA	GA	GA	GA	GA	GA	GA	GA	GA	GA	GA	GG	GA	GA	GA	GA	GA	GA	GA	GA	GA	GA	GA	GA	GA	GA	GA	GA	GA	GA	GA	GA	GA
333659	G/A	Unknown	27359985	+	GG	GG	GG	GA	GG	GG	GA	GG	AA	GG	GG	GA	GG	GG	GA	GG	GG	GG	GG	GG	GG	GA	GA	GG	GA	GG	GA	GG	GA	GG	GA	AA	GG	GG	GA	GG	GG	GG	GA	GG	GA	GG	GG	GG	GG
333659	C/T	Unknown	27360009	+	CC	CC	CC	CT	CC	CC	CT	CC	TT	CC	CC	CT	CC	CC	CT	CC	CC	CC	CC	CC	CC	CT	CT	CC	CT	CC	CT	CC	CT	CC	CT	TT	CC	CC	CT	CC	CC	CC	CT	CC	CT	CC	CC	CC	CC
333671	C/T	Unknown	27360959	+	CC	CC	CC	CC	CC	CC	CC	CC	CC	CC	CC	CC	CC	CC	CC	CC	CC	CC	CC	CC	CC	CC	CC	CT	CC	CC	CC	CC	CC	CC	CC	CC	CC	CC	CC	CC	CC	CC	CT	CC	CC	CC	CC	CC	CC
334685	G/T	Unknown	27444101	+	GG	GG	GG	GG	GG	GG	GG	GG	GG	GG	GG	GG	GG	GG	GG	GG	GG	GG	GG	GG	GG	GG	GT	GG	GG	GG	GG	GG	GG	GG	GG	GG	GG	GG	GG	GG	GG	GG	GG	GG	GG	GG	GG	GG	GG
334685	C/T	Unknown	27444118	+	CC	CC	CC	CT	CC	CC	CC	CC	CC	CC	CC	CC	CC	CC	CC	CC	CC	CC	CC	CC	CT	CC	CC	CC	CC	CC	CC	CC	CC	CC	CT	CC	CC	CC	CC	CT	CC	CT	CC	CC	CC	CC	CC	CC	CC
334685	C/T	Unknown	27444132	+	CC	CC	CC	CC	CC	CC	CC	CT	CC	CC	CC	CC	CC	CC	CC	CC	CT	CC	CC	CC	CC	CC	CC	CC	CC	CT	CC	CC	CC	CC	CC	CC	CT	CC	CC	CC	CC	CC	CC	CC	CT	CC	CC	CC	CC
336043	C/T	Unknown	27555471	+	CC	CT	CT	CT	CT	CT	CT	CT	CT	CT	CT	CT	CT	CT	CT	CT	CT	CT	CT	CT	CT	CT	CT	CT	CT	CT	CT	CT	CT	CT	CT	CT	CT	CT	TT	CT	CT	CT	CT	CT	CT	CT	CT	CT	CT
336115	C/T	Unknown	27561380	+	CC	CC	CC	CC	CT	CC	CC	CC	CC	CC	CC	CC	CC	CC	CC	CT	CC	CC	CC	CC	CC	CC	CC	CT	CC	CC	CT	CC	CC	CC	CC	CC	CC	CC	CC	CC	CC	CC	CT	CC	CC	CC	CC	CC	CC
336124	C/T	Unknown	27562123	+	CT	CT	CC	CT	CT	CC	CT	CC	CT	CT	CT	CC	CT	CT	CT	CC	CT	CT	CT	CT	CC	CC	CT	CT	CT	CT	CT	CT	CT	CT	CT	CC	CT	CT	CT	CT	CC	CT	CC	CT	CT	CT	CC	CT	CT
336161	C/T	Unknown	27565131	+	CC	CC	CC	CC	CC	CC	CC	CC	CC	CC	CC	CC	CC	CC	CC	CC	CC	CC	CC	CC	CC	CC	CC	CC	CC	CC	CC	CC	CC	CC	CC	CC	CC	CC	CC	CC	CC	CC	CC	CC	CC	CC	CC	CC	CC
336714	A/G	Unknown	27610472	+	AG	AG	AG	AA	AA	AA	AG	AA	AA	AA	AG	AG	AA	AA	AA	AG	AG	AG	AG	AA	AG	AG	AA	AA	AA	AG	AA	AG	AG	AA	AG	AA	AG	AA	GG	AG	AA	AA	AA	AA	AA	AG	AA	AG	AA
336906	T/C	Unknown	27626230	+	TT	TT	CC	TT	TC	TT	TT	TT	TT	TT	TC	TC	TC	TC	TT	TT	TC	TT	TC	TC	TC	TC	TC	TC	TC	TC	TT	TC	TC	TC	TC	TC	TC	TT	TC	TC	TC	TT	TC	TC	TT	TT	TT	TT	TC
336906	T/G	Unknown	27626233	+	TT	TT	GG	TT	TG	TT	TT	TT	TT	TT	TG	TG	TG	TG	TT	TT	TG	TT	TG	TG	TG	TG	TG	TG	TG	TG	TT	TG	TG	TG	TG	TG	TG	TT	TG	TG	TG	TT	TG	TG	TT	TT	TT	TT	TG
337081	C/T	Unknown	27640595	+	CT	CT	CT	CT	CC	CC	CT	CC	CT	CT	CT	CT	CT	CT	CC	CC	CT	CC	CT	CC	CT	CT	CC	CT	CC	CT	CC	CC	CT	CT	CC	CC	CC	CC	CT	CC	CC	CC	CC	CC	CC	CC	CC	CC	CC
338895	C/G	Unknown	27789363	+	CC	CG	CC	CC	CG	CC	CC	CC	CC	CC	CC	CC	CC	CC	CG	CC	CC	CC	CC	CC	CC	CC	CC	CC	CC	CC	CC	CC	CC	CC	CG	CC	CC	CC	CC	CC	CC	CC	CC	CC	CC	CC	CC	CC	CC
338938	A/C	Unknown	27792841	+	AA	AC	AC	AC	AA	AA	AA	AC	AC	AA	AC	AC	AC	AC	AC	AA	AC	AA	AC	AC	AC	AC	AC	AA	AC	AC	AA	AA	AA	AC	AC	AC	AC	AC	AA	AA	AA	AA	AA	AA	AC	AC	AC	AC	AC
338938	G/A	Unknown	27792848	+	GG	GA	GA	GA	GG	GG	GG	GA	GA	GG	GA	GA	GA	GA	GA	GG	GA	GG	GA	GA	GA	GA	GA	GG	GA	GA	GG	GG	GG	GA	GA	GA	GA	GA	GG	GG	GG	GG	GG	GG	GA	GA	GA	GA	GA
338953	C/A	Unknown	27794096	+	CC	CC	CC	CC	CC	CC	CA	CC	CC	CC	CC	CC	CC	CC	CC	CC	CC	CC	CC	CC	CC	CC	CC	CC	CC	CC	CC	CC	CC	CC	CC	CC	CC	CC	CC	CC	CC	CC	CC	CC	CC	CC	CC	CC	CC
340091	C/T	Unknown	27887393	+	CT	CT	CT	CT	CT	CT	CT	CT	CT	CT	CT	CT	CT	CT	CT	CT	CT	CT	CT	CT	CT	CT	CT	CT	CT	CC	CT	CT	CT	CT	CT	CT	CT	CT	CT	CT	CT	CC	CT	CT	CT	CT	CT	CT	CT
340182	C/A	Unknown	27894897	+	CC	CC	CC	CC	CC	CC	CA	CC	CC	CC	CC	CC	CC	CC	CC	CC	CC	CC	CC	CC	CC	CC	CC	CC	CC	CC	CC	CC	CC	CC	CC	CC	CC	CC	CA	CC	CC	CC	CC	CC	CC	CC	CC	CC	CC
340977	C/T	Unknown	27960043	+	CC	CC	CC	CT	CC	CC	CC	CC	CC	CC	CC	CC	CC	CC	CC	CC	CC	CC	CC	CC	CC	CC	CC	CC	CC	CC	CC	CC	CC	CC	CT	CC	CC	CC	CC	CC	CC	CC	CC	CC	CC	CC	CC	CC	CC
341502	A/T	Unknown	28003096	+	AA	AA	AA	AA	AA	AA	AA	AA	AA	AA	AA	AA	AA	AA	AT	AA	AA	AA	AA	AA	AA	AA	AT	AT	AT	AT	AT	AA	AA	AA	AA	AT	AA	AA	AT	AA	AA	AT	AA	AA	AA	AA	AA	AA	AA
341727	T/C	Unknown	28021597	+	TT	TT	TT	TT	TT	TT	TT	TT	TT	TT	TT	TT	TT	TT	TT	TT	TT	TT	TT	TT	TT	TT	TT	TT	TT	TT	TT	TT	TT	TT	TT	TT	TT	TT	TT	TT	TT	TT	TT	TT	TT	TC	TT	TT	TT
341764	C/A	Unknown	28024608	+	CC	CC	CC	CC	CC	CC	CC	CC	CC	CC	CC	CC	CC	CC	CC	CC	CC	CC	CC	CC	CC	CC	CC	CC	CC	CC	CA	CC	CC	CC	CC	CC	CC	CC	CC	CC	CC	CC	CC	CC	CC	CC	CA	CC	CC
341992	T/A	Unknown	28043287	+	TT	TT	TT	TT	TT	TT	TT	TT	TT	TT	TT	TT	TT	TT	TT	TT	TT	TT	TT	TT	TT	TT	TT	TT	TT	TT	TT	TT	TA	TA	TT	TT	TT	TT	TT	TA	TT	TT	TT	TT	TT	TT	TT	TT	TT
342012	G/A	Unknown	28044930	+	GG	GG	GG	GG	GG	GG	GG	GG	GG	GG	GG	GG	GG	GG	GG	GG	GG	GG	GG	GG	GG	GG	GG	GG	GG	GG	GG	GA	GG	GG	GA	GA	GG	GG	GG	GG	GG	GA	GG	GG	GG	GG	GG	GG	GG
343524	A/C	Unknown	28168904	+	AA	AA	AA	AA	AA	AC	AA	AA	AA	AC	AC	AA	AA	AA	AA	AA	AA	AA	AA	AA	AA	AC	AA	AA	AA	AA	AA	AA	AA	AA	AA	AC	AA	AA	AA	AA	AA	AA	AA	AA	AA	AC	AA	AA	AA
343524	G/T	Unknown	28168907	+	GG	GG	GG	GG	GG	GT	GG	GG	GG	GG	GT	GG	GG	GG	GG	GG	GG	GG	GG	GG	GG	GT	GG	GG	GG	GG	GG	GG	GG	GG	GG	GT	GG	GG	GG	GG	GG	GG	GG	GG	GG	GT	GG	GG	GG
343698	G/A	Unknown	28183164	+	GG	GG	GG	GG	GG	GG	GG	GG	GG	GG	GG	GG	GG	GG	GG	GG	GG	GG	GG	GG	GG	GG	GA	GG	GG	GG	GA	GG	GG	GG	GG	GG	GG	GG	GG	GG	GG	GG	GG	GG	GG	GG	GG	GG	GG
343784	T/A	Unknown	28190232	+	TT	TT	TT	TT	TT	TT	TT	TT	TT	TT	TT	TT	TT	TT	TT	TT	TT	TT	TT	TT	TT	TT	TT	TT	TT	TT	TT	TT	TT	TT	TT	TT	TT	TT	TT	TT	TT	TT	TT	TT	TT	TT	TT	TT	TT
344131	C/T	Unknown	28218678	+	CC	CC	CC	CC	CT	CC	CC	CC	CC	CC	CC	CC	CC	CC	CC	CC	CC	CC	CC	CC	CC	CC	CC	CC	CC	CC	CC	CC	CT	CC	CC	CC	CC	CC	CC	CC	CC	CC	CC	CC	CC	CC	CC	CC	CC
344136	T/G	Unknown	28219134	+	TT	TG	TT	TG	TT	TT	TT	TT	TT	TT	TT	TT	TG	TT	TT	TT	TT	TT	TT	TT	TT	TT	TT	TT	TT	TT	TT	TG	TT	TT	TT	TT	TT	TT	TT	TT	TT	TT	TT	TT	TG	TG	TT	TT	TT
344399	C/G	Unknown	28240673	+	CC	CG	CC	CG	CG	CC	CG	CC	CG	CC	CC	CC	CC	CC	CC	CC	CC	CG	CC	CG	CC	CC	CC	CC	CG	CC	CC	CC	CG	CC	CC	CC	CC	CC	CC	CC	CC	CG	CC	CC	CC	CC	CG	CC	CG
344822	T/C	Unknown	28275334	+	TT	TT	TT	TT	TC	TC	TT	TT	TT	TT	TT	TT	TT	TT	TC	TT	TC	TT	TT	TT	TT	TT	TT	TT	TT	TT	TT	TT	TT	TT	TT	TC	TT	TT	TT	TT	TT	TT	TT	TT	TT	TT	TT	TT	TT
344822	C/G	Unknown	28275346	+	CG	CG	CG	CG	CG	CG	CG	CG	CG	CG	CG	CG	CG	CG	CG	CG	CG	CC	CG	CC	CG	CG	CG	CG	CG	CG	CG	CG	CG	CG	CG	CG	CG	CG	CG	CG	CG	CG	CG	CG	CG	CG	CG	CG	CG
344902	T/C	Unknown	28281893	+	TC	TT	TT	TT	TT	TT	TC	TT	TT	TT	TT	TT	TT	TT	TT	TT	TC	TC	TT	TT	TT	TT	TT	TT	TT	TT	TT	TT	TT	TC	TT	TT	TT	TT	TT	TT	TT	TT	TT	TT	TT	TT	TT	TT	TT
345085	C/A	Unknown	28296928	+	CA	CC	CC	CC	CC	CC	CC	CC	CC	CC	CC	CC	CC	CC	CC	CC	CC	CC	CC	CC	CC	CC	CC	CC	CC	CC	CC	CC	CA	CC	CA	CC	CC	CC	CC	CC	CC	CC	CC	CC	CC	CC	CC	CC	CC
346078	G/A	Unknown	28378328	+	GG	GG	GG	GG	GG	GG	GG	GG	GG	GG	GG	GG	GG	GG	GG	GG	GG	GG	GG	GG	GG	GG	GG	GG	GG	GG	GG	GG	GG	GG	GG	GG	GG	GG	GG	GG	GG	GG	GG	GG	GG	GA	GG	GG	GG
346111	G/A	Unknown	28381076	+	GG	GG	GG	GG	GG	GA	GG	GG	GG	GG	GG	GG	GG	GG	GG	GG	GG	GG	GG	GG	GG	GG	GG	GG	GG	GG	GG	GG	GG	GG	GG	GA	GG	GG	GG	GG	GG	GG	GG	GG	GG	GG	GG	GG	GG
346380	C/G	Unknown	28403107	+	CG	CG	CG	CG	CG	CG	CG	CG	CG	CG	CG	CG	CG	CG	CG	CG	CG	CG	CG	CG	CG	CG	CG	CG	CG	CG	CG	CG	CG	CG	CG	CG	CG	CG	CG	CG	CG	CG	CG	CG	CG	CG	CG	CG	CG
346663	G/A	Unknown	28426352	+	GG	GG	GG	GG	GG	GG	GG	GG	GG	GG	GG	GG	GA	GG	GG	GG	GG	GG	GG	GG	GG	GG	GG	GG	GG	GA	GG	GG	GG	GG	GA	GG	GG	GG	GG	GG	GG	GG	GG	GA	GG	GG	GG	GG	GG
347696	G/A	Unknown	28510998	+	GG	GG	GG	GG	GG	GG	GG	GG	GG	GG	GG	GG	GG	GG	GG	GA	GG	GG	GG	GG	GG	GG	GG	GG	GG	GG	GG	GG	GA	GG	GG	GG	GG	GG	GG	GG	GG	GG	GG	GG	GG	GA	GG	GG	GG
348252	G/A	Unknown	28556597	+	GG	GG	GG	GA	GG	GG	GA	AA	GA	GG	GG	GG	GG	GG	GG	GG	GG	GG	GG	GG	GG	GA	GG	GG	GG	GG	GA	GG	GG	GG	GG	GG	GG	GG	GG	GA	GG	GG	GG	GA	GG	GA	GG	GG	GG
348512	C/T	Unknown	28577943	+	CC	CC	CC	CC	CC	CC	CC	CC	CC	CC	CC	CC	CC	CC	CC	CT	CC	CC	CC	CC	CC	CC	CC	CC	CC	CC	CC	CC	CC	CC	CC	CC	CC	CC	CC	CC	CC	CC	CC	CC	CC	CC	CC	CC	CC
349056	G/A	Unknown	28622527	+	GG	GG	GG	GG	GG	GG	GA	GG	GG	GG	GG	GG	GG	GG	GG	GG	GG	GA	GG	GG	GG	GG	GG	GG	GG	GG	GG	GG	GG	GG	GG	GG	GG	GG	GG	GG	GG	GG	GG	GG	GG	GG	GG	GG	GG
349638	G/C	Unknown	28670242	+	GC	GG	GG	GG	GG	GG	GG	GG	GG	GG	GG	GG	GG	GG	GG	GG	GG	GG	GG	GG	GG	GG	GG	GG	GG	GG	GG	GG	GG	GG	GG	GG	GG	GG	GG	GG	GG	GC	GG	GG	GG	GC	GG	GG	GG
349849	C/G	Unknown	28687546	+	CC	CC	CC	CC	CC	CC	CC	CG	CG	CC	CC	CC	CC	CC	CC	CC	CG	CC	CC	CC	CG	CG	CC	CC	CC	CC	CC	CC	CC	CC	CC	CC	CC	CC	CC	CC	CC	CC	CC	CC	CC	CC	CC	CC	CC
349849	G/T	Unknown	28687591	+	GG	GT	GG	GG	GG	GG	GT	GT	GG	GG	GG	GG	GT	GG	GT	GG	GG	GG	GG	GG	GG	GG	GG	GT	GG	GG	GG	GT	GG	GG	GG	GG	GG	GG	GG	GG	GG	GG	GG	GG	GT	GT	GG	GG	GG
349995	G/A	Unknown	28699531	+	GG	GG	GG	GA	GG	GG	GG	GG	GG	GG	GG	GG	GG	GG	GG	GG	GG	GG	GG	GG	GG	GG	GG	GG	GG	GG	GG	GA	GG	GG	GG	GG	GG	GG	GG	GG	GG	GA	GG	GG	GG	GG	GG	GG	GG
351030	G/A	Unknown	28784396	+	GA	GG	GG	GG	GG	GG	GG	GG	GA	GG	GG	GG	GG	GG	GG	GG	GG	GG	GG	GG	GG	GG	GG	GG	GA	GG	GG	GG	GG	GA	GG	GG	GG	GG	GA	GG	GG	GG	GG	GG	GG	GG	GG	GG	GG
351030	C/T	Unknown	28784429	+	CC	CC	CC	CC	CC	CT	CC	CC	CT	CC	CC	CC	CC	CC	CC	CC	CC	CC	CC	CC	CC	CT	CC	CC	CT	CC	CC	CC	CC	CC	CT	CC	CC	CC	CC	CC	CC	CC	CC	CC	CC	CC	CC	CC	CC
351572	G/A	Unknown	28828839	+	GA	GG	GG	GG	GG	GG	GG	GG	GG	GG	GG	GG	GG	GG	GG	GG	GG	GG	GG	GG	GG	GG	GG	GG	GG	GG	GG	GG	GG	GG	GA	GA	GG	GG	GG	GG	GG	GG	GG	GG	GG	GG	GG	GG	GG
352468	A/G	Unknown	28902333	+	AA	AA	AA	AG	AA	AA	AA	AA	AA	AA	AA	AA	AA	AA	AG	AA	AA	AG	AA	AA	AA	AA	AA	AA	AA	AA	AA	AA	AG	AG	AA	AA	AA	AA	AA	AA	AA	AA	AA	AA	AA	AA	AA	AA	AA
353008	C/T	Unknown	28946618	+	CC	CT	CC	CT	CC	CC	CC	CC	CC	CC	CC	CC	CC	CC	CC	CC	CC	CT	CC	CC	CC	CC	CC	CC	CC	CT	CC	CT	CT	CC	CC	CT	CC	CT	CC	CC	CC	CC	CC	CC	CC	CC	CT	CC	CT
353774	C/G	Unknown	29009405	+	CC	CC	CC	CC	CC	CC	CC	CC	CC	CC	CC	CC	CC	CC	CC	CC	CC	CG	CC	CC	CC	CC	CC	CC	CG	CC	CC	CC	CC	CC	CC	CC	CC	CC	CC	CC	CC	CC	CC	CC	CC	CC	CC	CC	CC
354209	C/T	Unknown	29045079	+	CT	CC	CC	CC	CC	CC	CC	CC	CC	CT	CC	CC	CC	CC	CC	CC	CC	CC	CC	CC	CC	CC	CC	CC	CC	CC	CC	CC	CC	CT	CC	CC	CC	CC	CC	CC	CC	CC	CC	CC	CC	CC	CC	CC	CC
354608	G/A	Unknown	29077780	+	GG	GG	GG	GG	GG	GG	GG	GA	GG	GG	GG	GG	GG	GG	GG	GG	GG	GG	GG	GG	GG	GG	GG	GG	GG	GG	GG	GG	GG	GG	GA	GG	GG	GG	GA	GG	GG	GG	GA	GG	GG	GG	GG	GG	GG
354758	G/C	Unknown	29090111	+	GG	GC	GG	GG	GG	GG	GG	GG	GG	GG	GG	GG	GC	GG	GG	GG	GG	GG	GG	GG	GG	GG	GG	GG	GG	GG	GG	GG	GG	GC	GG	GG	GG	GC	GG	GG	GG	GG	GG	GG	GG	GG	GG	GG	GG
355052	G/A	Unknown	29114198	+	GG	GG	GG	GG	GG	GG	GA	GG	GG	GG	GG	GG	GG	GG	GG	GG	GG	GG	GG	GG	GG	GG	GA	GG	GG	GG	GG	GG	GG	GG	GG	GA	GG	GG	GG	GG	GG	GG	GG	GG	GG	GG	GG	GG	GG
355052	G/A	Unknown	29114203	+	GG	GG	GG	GG	GG	GG	GA	GG	GG	GG	GG	GG	GG	GG	GG	GG	GG	GG	GG	GG	GG	GG	GA	GG	GG	GG	GG	GG	GG	GG	GG	GA	GG	GG	GG	GG	GG	GG	GG	GG	GG	GG	GG	GG	GG
355124	G/T	Unknown	29120104	+	GT	GT	GT	GT	GT	GG	GT	GG	GT	GT	GT	GT	GT	GT	GT	GT	GT	GT	GT	GT	GT	GT	GT	GT	GT	GT	GT	GT	GT	GT	GT	GG	GT	GG	GT	GT	GT	GT	GG	GT	GG	GT	GG	GT	GT
355136	T/C	Unknown	29121132	+	TT	TT	TT	TC	TT	TT	TT	TT	TC	TT	TC	TT	TT	TT	TT	TT	TT	TT	TT	TT	TT	TT	TT	TT	TT	TT	TT	TT	TT	TC	TT	TT	TT	TT	TT	TC	TT	TT	TT	TT	TT	TT	TT	TT	TT
356106	C/A	Unknown	29200632	+	CA	CC	CC	CC	CC	CC	CA	CA	CC	CA	CC	CA	CC	CC	CC	CA	CC	CC	CC	CC	CC	CA	CC	CC	CA	CA	CA	CA	CA	CA	CA	CA	CC	CC	CC	CC	CA	CC	CA	CC	CA	CC	CC	CC	CA
356106	G/C	Unknown	29200653	+	GC	GC	GC	GC	GC	GC	GC	GC	GC	GC	GC	GC	GC	GC	GC	GC	GC	GC	GC	GC	GC	GC	GC	GC	GC	GC	GC	GC	GC	GC	GC	GC	GC	GC	GC	GC	GC	GC	GC	GC	GC	GC	GC	GC	GC
357138	G/A	Unknown	29285266	+	GG	GG	GG	GA	GG	GA	GG	GG	GG	GG	GG	GG	GG	GG	GG	GG	GG	GG	GG	GG	GG	GG	GG	GG	GG	GG	GG	GG	GA	GG	GG	GG	GG	GG	GG	GG	GG	GG	GG	GG	GG	GG	GG	GG	GG
357545	A/T	Unknown	29318648	+	AT	AT	AT	AT	AT	AT	AT	AT	AT	AT	AT	AT	AT	AT	AT	AT	AT	AT	AT	AA	AT	AT	AT	AT	AT	AT	AT	AT	AT	AT	AT	AT	AT	AT	AT	AT	AT	AT	AT	AT	AA	AT	AT	AT	AT
357545	G/C	Unknown	29318659	+	GC	GC	GC	GC	GC	GC	GC	GC	GC	GC	GC	GC	GC	GC	GC	GC	GC	GC	GC	GG	GC	GC	GC	GC	GC	GC	GC	GC	GC	GC	GC	GC	GC	GC	GC	GC	GC	GC	GC	GC	GG	GC	GC	GC	GC
357758	C/T	Unknown	29336129	+	CC	CC	CC	CC	CT	CC	CT	CC	CC	CC	CC	CC	CC	CC	CC	CC	CT	CC	CC	CC	CC	CT	CC	CC	CC	CC	CT	CC	CC	CT	CC	CC	CC	CC	CC	CC	CC	CC	CC	CC	CC	CC	CC	CC	CC
358149	A/C	Unknown	29368186	+	AA	AA	AA	AA	AA	AA	AA	AA	AA	AA	AA	AA	AA	AA	AA	AA	AA	AC	AA	AA	AA	AA	AA	AA	AA	AA	AA	AA	AA	AA	AA	AA	AA	AA	AA	AA	AA	AA	AC	AC	AA	AA	AA	AA	AA
358262	C/G	Unknown	29377425	+	CG	CC	CG	CG	CC	CG	CC	CG	CG	CC	CG	CG	CG	CC	CC	CG	CG	CC	CG	CG	CG	CG	CG	CG	CC	CG	CG	CG	CG	CG	CC	CG	CG	CG	CG	CG	CG	CG	CC	CG	CC	CG	CG	CG	CG
358299	G/A	Unknown	29380462	+	GG	GG	GG	GG	GG	GG	GG	GG	GG	GG	GG	GG	GG	GG	GA	GG	GG	GG	GG	GG	GA	GG	GG	GG	GG	GG	GA	GG	GG	GG	GG	GG	GA	GG	GG	GG	GG	GG	GA	GG	GG	GG	GA	GG	GG
358987	C/G	Unknown	29436880	+	CC	CC	CC	CC	CC	CC	CG	CG	CC	CC	CC	CC	CC	CC	CC	CC	CC	CC	CC	CC	CC	CC	CC	CC	CC	CC	CC	CC	CC	CC	CC	CC	CC	CC	CC	CG	CC	CC	CC	CG	CG	CC	CC	CC	CC
359024	C/G	Unknown	29439969	+	CC	CC	CC	CC	CC	CC	CC	CG	CG	CC	CC	CC	CC	CC	CC	CC	CC	CC	CC	CC	CC	CC	CC	CC	CC	CC	CC	CC	CC	CC	CC	CC	CC	CC	CC	CC	CC	CC	CC	CC	CC	CC	CC	CC	CC
359199	A/G	Unknown	29454256	+	AA	AA	AA	AA	AA	AA	AA	AA	AA	AA	AA	AA	AA	AA	AA	AA	AA	AA	AA	AA	AA	AA	AA	AG	AA	AA	AA	AA	AA	AA	AA	AA	AA	AA	AA	AA	AA	AA	AG	AA	AA	AA	AG	AA	AA
359323	T/C	Unknown	29464425	+	TT	TT	TT	TT	TT	TT	TT	TT	TC	TT	TT	TT	TT	TT	TC	TT	TT	TT	TT	TT	TT	TT	TT	TT	TT	TT	TT	TT	TT	TT	TT	TT	TT	TT	TT	TT	TT	TT	TT	TT	TT	TT	TT	TT	TT
359474	C/A	Unknown	29476810	+	CA	CC	CC	CC	CC	CC	CC	CC	CC	CC	CC	CC	CC	CC	CC	CC	CC	CC	CC	CC	CC	CC	CC	CC	CC	CC	CC	CC	CA	CC	CC	CC	CC	CC	CC	CC	CC	CA	CC	CC	CC	CC	CC	CC	CC
359916	A/G	Unknown	29513071	+	AA	AA	AA	AA	AA	AG	AA	AA	AG	AA	AA	AA	AA	AA	AG	AA	AA	AG	AA	AA	AA	AA	AG	AA	AG	AA	AA	AA	AA	AG	AA	AA	AA	AA	AG	AA	AA	AA	AA	AA	AA	AA	AA	AA	AA
360088	T/C	Unknown	29527183	+	TT	TT	TT	TT	TT	TT	TT	TC	TT	TT	TT	TT	TT	TT	TT	TT	TT	TT	TT	TT	TT	TT	TT	TT	TT	TT	TT	TT	TT	TT	TT	TT	TT	TT	TT	TT	TT	TT	TC	TT	TT	TT	TT	TT	TT
360439	G/A	Unknown	29555967	+	GG	GG	GG	GG	GG	GG	GA	GG	GG	GG	GG	GA	GG	GG	GG	GG	GG	GG	GG	GG	GG	GA	GA	GG	GA	GG	GG	GG	GG	GG	GG	GG	GG	GG	GA	GG	GG	GG	GG	GG	GG	GA	GG	GG	GG
360640	G/A	Unknown	29572415	+	GG	GG	GG	GG	GG	GA	GG	GG	GG	GG	GG	GG	GA	GG	GG	GG	GG	GG	GG	GG	GG	GG	GG	GG	GG	GG	GG	GG	GG	GG	GG	GA	GG	GG	GG	GG	GG	GG	GG	GG	GG	GG	GG	GG	GA
360764	C/T	Unknown	29582589	+	CC	CC	CC	CC	CC	CC	CC	CC	CC	CC	CC	CC	CC	CC	CT	CC	CC	CC	CC	CC	CC	CC	CC	CC	CC	CC	CC	CC	CC	CC	CC	CC	CC	CC	CC	CC	CC	CC	CC	CT	CC	CC	CC	CC	CC
361523	C/T	Unknown	29644810	+	CC	CT	CC	CC	CC	CC	CC	CC	CC	CC	CC	CT	CC	CC	CC	CC	CC	CC	CC	CC	CC	CC	CC	CC	CT	CC	CC	CC	CC	CC	CC	CC	CC	CC	CC	CC	CC	CC	CC	CC	CC	CC	CC	CC	CT
361523	G/A	Unknown	29644820	+	GG	GG	GA	GG	GG	GG	GG	GG	GA	GG	GG	GG	GG	GG	GG	GG	GG	GG	GG	GG	GG	GG	GG	GG	GA	GG	GG	GG	GG	GG	GG	GG	GG	GG	GG	GG	GG	GG	GG	GG	GG	GG	GA	GG	GG
361523	C/T	Unknown	29644831	+	CC	CC	CC	CC	CC	CC	CC	CC	CC	CC	CC	CC	CC	CC	CC	CC	CC	CC	CC	CC	CC	CC	CC	CC	CC	CC	CC	CC	CC	CC	CC	CC	CC	CC	CC	CC	CC	CT	CC	CC	CC	CC	CC	CC	CC
361658	G/T	Unknown	29655884	+	GG	GG	GG	GG	GG	GG	GG	GG	GG	GG	GG	GG	GG	GT	GG	GG	GG	GG	GG	GG	GT	GG	GG	GG	GG	GG	GT	GG	GG	GG	GG	GT	GG	GG	GG	GG	GG	GG	GG	GG	GG	GG	GG	GG	GG
362502	G/A	Unknown	29725097	+	GA	GA	GA	GA	GA	AA	GA	GA	GA	GA	GA	GA	GA	GA	GA	GA	GA	GA	GA	GA	GA	GG	GA	GA	GA	GA	GA	GA	GA	GA	GA	GA	GA	GA	GA	GA	GA	GA	GA	GA	GA	GA	GA	GA	GA
362502	C/G	Unknown	29725126	+	CG	CG	CG	CG	CG	GG	CG	CG	CG	CG	CG	CG	CG	CG	CG	CG	CG	CG	CG	CG	CG	CC	CG	CG	CG	CG	CG	CG	CG	CG	CG	CG	CG	CG	CG	CG	CG	CG	CG	CG	CG	CG	CG	CG	CG
362724	G/A	Unknown	29743317	+	GG	GG	GG	GG	GG	GA	GG	GG	GG	GG	GG	GG	GA	GG	GG	GG	GG	GG	GG	GG	GG	GG	GA	GG	GG	GG	GG	GG	GG	GG	GG	GG	GG	GG	GG	GG	GG	GG	GG	GG	GG	GG	GG	GG	GG
363328	G/C	Unknown	29792843	+	GG	GG	GG	GC	GG	GG	GG	GG	GG	GG	GG	GG	GG	GG	GG	GG	GG	GG	GG	GG	GG	GG	GG	GG	GG	GG	GG	GC	GG	GG	GG	GG	GG	GG	GG	GG	GG	GG	GG	GG	GG	GG	GG	GG	GG
363880	C/G	Unknown	29838118	+	CC	CC	CG	CC	CC	CC	CG	CC	CG	CC	CG	CC	CC	CC	CC	CC	CC	CC	CC	CC	CC	CC	CC	CG	CC	CC	CC	CG	CC	CC	CC	CC	CC	CC	CC	CC	CC	CC	CC	CC	CG	CC	CC	CC	CC
364084	T/C	Unknown	29854824	+	TC	TT	TC	TC	TT	TC	TC	TC	TC	TC	TC	TC	TC	TC	TC	TC	TC	TC	TT	TC	TC	TC	TC	TC	TC	TC	TC	TC	TC	TC	TC	TC	TC	TC	TC	TC	TC	TC	TC	TC	TC	TC	TC	TC	TC
364084	C/G	Unknown	29854852	+	CG	CC	CC	CC	CC	CG	CG	CG	CG	CC	CC	CG	CG	CG	CC	CG	CG	CG	CC	CG	CC	CG	CG	CC	CG	CG	CG	CC	CG	CC	CG	CG	CC	CG	CC	CG	CG	CC	CG	CG	CG	CC	CG	CC	CG
364563	G/A	Unknown	29894094	+	GA	GA	GA	GA	GA	GG	GA	GA	GA	GA	GA	GA	GA	GA	GA	GA	GA	GA	GA	GA	GA	GA	GA	GA	GA	GA	GA	GA	GA	GA	GA	GA	GA	GA	GG	GA	GA	GA	GG	GA	GA	GG	GG	GA	GA
364563	G/T	Unknown	29894117	+	TG	TG	TG	TG	TG	TG	TG	TG	TG	TG	TG	TG	TG	TG	TG	TG	TG	TG	TG	TG	TG	TG	TG	TG	TG	TG	TG	TG	TG	TG	TG	TG	TG	TG	TG	TG	TG	TG	TG	TG	TG	TG	GG	TG	TG
365175	C/T	Unknown	29944283	+	CC	CC	CC	CC	CC	CC	CT	CT	CC	CC	CC	CC	CC	CC	CC	CC	CC	CC	CC	CC	CC	CC	CC	CC	CC	CC	CC	CC	CC	CC	CT	CC	CC	CC	CC	CC	CC	CC	CC	CC	CC	CC	CC	CC	CT
365175	A/G	Unknown	29944299	+	AA	AA	AA	AA	AG	AG	AA	AA	AA	AA	AA	AA	AA	AA	AA	AA	AA	AA	AA	AA	AG	AA	AA	AG	AA	AG	AG	AA	AA	AA	AA	AA	AA	AA	AA	AA	AA	AA	AA	AA	AA	AG	AA	AA	AA
365220	G/A	Unknown	29947969	+	GG	GG	GG	GG	GG	GG	GG	GG	GG	GA	GG	GG	GA	GG	GG	GA	GG	GG	GG	GG	GG	GA	GG	GG	GG	GG	GG	GG	GG	GG	GG	GG	GG	GG	GG	GG	GA	GA	GG	GG	GG	GG	GA	GG	GG
365290	A/G	Unknown	29953719	+	AA	AA	AA	AA	AA	AA	AA	AA	AG	AA	AA	AA	AA	AA	AA	AA	AA	AA	AA	AA	AA	AA	AA	AA	AA	AA	AA	AG	AA	AA	AA	AA	AA	AA	AA	AA	AA	AA	AA	AA	AG	AA	AG	AA	AA
365662	G/T	Unknown	29984244	+	GG	GG	GG	GG	GT	GG	GT	GG	GG	GG	GG	GT	GG	GG	GG	GG	GG	GG	GG	GG	GG	GG	GG	GG	GG	GG	GG	GT	GG	GG	GG	GG	GG	GG	GG	GG	GG	GG	GT	GT	GG	GG	GG	GG	GG
365990	G/A	Unknown	30011108	+	GG	GG	GG	GG	GG	GG	GA	GG	GG	GG	GG	GG	GG	GG	GG	GG	GG	GG	GG	GG	GG	GG	GG	GG	GG	GG	GG	GA	GG	GG	GG	GG	GG	GG	GG	GG	GG	GG	GG	GG	GG	GG	GG	GG	GG
366078	C/A	Unknown	30018325	+	CA	CA	CA	CC	CA	CA	CC	CA	CA	CA	CA	CA	CA	CA	CA	CA	CA	CA	CA	CA	CC	CA	CA	CA	CA	CA	CA	CA	CA	CA	CA	CA	CA	CA	CA	CA	CA	CA	CA	CA	CA	CA	CA	CA	CA
366078	C/A	Unknown	30018352	+	CC	CC	CC	CC	CC	CC	CC	CC	CC	CC	CC	CC	CC	CC	CC	CC	CA	CC	CC	CC	CC	CC	CC	CC	CA	CA	CC	CA	CC	CC	CC	CC	CC	CC	CC	CC	CC	CC	CC	CC	CC	CC	CC	CC	CC
366755	C/T	Unknown	30073884	+	CC	CC	CC	CC	CC	CC	CC	CC	CC	CC	CC	CC	CC	CC	CC	CC	CC	CC	CC	CC	CC	CC	CT	CC	CC	CC	CT	CC	CC	CC	CC	CC	CC	CC	CC	CC	CC	CC	CC	CT	CC	CC	CC	CC	CC
367267	G/A	Unknown	30115859	+	GG	GG	GG	GG	GG	GG	GG	GG	GG	GG	GG	GG	GG	GG	GG	GG	GG	GG	GG	GG	GG	GG	GG	GG	GG	GG	GG	GG	GG	GG	GG	GG	GG	GG	GG	GG	GG	GG	GG	GG	GA	GG	GG	GG	GG
367318	C/G	Unknown	30120038	+	CC	CC	CC	CC	CC	CC	CG	CC	CG	CC	CC	CC	CC	CC	CC	CC	CC	CC	CC	CC	CC	CC	CC	CC	CC	CC	CC	CC	CC	CC	CC	CC	CC	CC	CC	CC	CC	CC	CC	CC	CC	CC	CC	CC	CC
367693	A/G	Unknown	30150795	+	AG	AA	AA	AA	AA	AA	AA	AA	AA	AA	AA	AA	AA	AA	AA	AA	AA	AA	AA	AA	AA	AA	AA	AA	AA	AA	AA	AA	AA	AA	AG	AA	AA	AG	AA	AA	AA	AA	AA	AA	AA	AA	AA	AA	AA
368107	C/T	Unknown	30184712	+	CT	CC	CT	CT	CT	CT	CT	CT	CT	CT	CT	CT	CT	CC	CT	CT	CT	CT	CT	CT	CT	CT	CC	CC	CT	CT	CT	CT	CT	CC	CT	CC	CT	CT	CT	CT	CT	CT	CC	CT	CC	CT	CT	CT	CT
368107	C/G	Unknown	30184733	+	CG	CC	CG	CG	CG	CG	CG	CG	CG	CG	CG	CG	CG	CG	CC	CC	CG	CC	CG	CG	CG	CC	CG	CC	CG	CG	CG	CG	CG	CG	CG	CC	CG	CG	CG	CC	CG	CC	CG	CG	CG	CG	CG	CG	CG
368151	C/T	Unknown	30188316	+	CC	CC	CC	CC	CC	CC	CC	CC	CC	CC	CC	CC	CC	CC	CC	CC	CC	CC	CC	CC	CC	CC	CT	CC	CC	CT	CC	CC	CC	CC	CC	CT	CC	CC	CC	CC	CC	CC	CC	CC	CC	CC	CC	CC	CC
369058	T/C	Unknown	30262717	+	TT	TT	TT	TC	TT	TT	TC	TT	TC	TT	TT	TT	TT	TT	TT	TT	TT	TT	TT	TT	TT	TT	TC	TT	TT	TC	TT	TT	TT	TT	TC	TT	TT	TT	TT	TT	TT	TT	TT	TT	TC	TT	TT	TT	TT
369965	G/A	Unknown	30337085	+	GG	GG	GG	GG	GG	GG	GG	GA	GG	GG	GG	GG	GG	GG	GG	GG	GG	GG	GG	GG	GG	GG	GG	GG	GG	GG	GG	GG	GG	GG	GG	GG	GG	GG	GG	GG	GG	GG	GG	GG	GG	GG	GG	GG	GG
370179	G/A	Unknown	30354606	+	GG	GG	GG	GG	GG	GG	GG	GG	GG	GG	GG	GG	GG	GG	GG	GG	GG	GG	GG	GA	GG	GG	GG	GG	GG	GG	GG	GA	GG	GG	GG	GG	GG	GG	GG	GG	GG	GG	GG	GG	GG	GG	GG	GG	GG
370179	T/G	Unknown	30354635	+	TT	TT	TT	TT	TT	TG	TT	TT	TT	TT	TT	TT	TT	TT	TT	TT	TT	TT	TT	TG	TT	TT	TT	TT	TT	TG	TT	TG	TT	TT	TT	TT	TT	TT	TT	TT	TT	TT	TT	TT	TG	TT	TT	TT	TT
370271	G/C	Unknown	30362195	+	GC	GC	GC	GC	GC	GC	GC	GC	GC	GC	GC	GC	GC	GC	GG	GC	GC	GC	GC	GG	GC	GC	GC	GC	GC	GC	GC	GC	GC	GC	GC	GC	GC	GC	GC	GC	GC	GC	GC	GC	GC	GC	GC	GC	GC
370921	C/A	Unknown	30415456	+	CC	CC	CC	CC	CC	CC	CC	CC	CC	CC	CC	CC	CC	CC	CC	CC	CC	CC	CC	CC	CC	CC	CC	CC	CC	CC	CC	CC	CC	CC	CC	CA	CC	CC	CC	CC	CC	CC	CC	CC	CC	CC	CC	CC	CC
371713	C/T	Unknown	30480427	+	CC	CC	CC	CC	CC	CT	CC	CC	CC	CC	CT	CC	CC	CC	CC	CT	CC	CC	CC	CC	CC	CT	CC	CC	CC	CC	CC	CC	CC	CC	CC	CC	CC	CC	CC	CC	CC	CC	CC	CC	CC	CT	CT	CC	CC
372263	A/T	Unknown	30525521	+	AT	AT	AT	AA	AT	AT	AT	AT	AT	AT	AT	AT	AT	AT	AT	AT	AT	AT	AT	AT	AT	AT	AT	AT	AT	AT	AT	AT	AT	AT	AT	AT	AT	AT	AT	AT	AT	TT	AT	AT	TT	AT	AT	AT	AT
372929	T/C	Unknown	30580108	+	TT	TT	TT	TT	TT	TT	TT	TT	TT	TT	TT	TT	TT	TT	TT	TT	TT	TT	TT	TT	TT	TT	TT	TT	TT	TT	TT	TT	TT	TT	TT	TC	TT	TT	TT	TT	TT	TT	TC	TT	TC	TT	TT	TT	TT
373189	A/G	Unknown	30601422	+	AG	AA	AA	AA	AA	AA	AA	AA	AA	AA	AA	AA	AA	AA	AA	AA	AA	AA	AA	AA	AA	AA	AA	AA	AA	AA	AA	AA	AA	AA	AA	AA	AA	AA	AA	AA	AA	AA	AA	AA	AA	AA	AA	AA	AA
373299	C/T	Unknown	30610455	+	CC	CT	CC	CC	CT	CC	CC	CT	CC	CC	CC	CC	CC	CC	CT	CC	CT	CC	CC	CT	CT	CC	CC	CC	CC	CC	CC	CC	CC	CC	CC	CC	CC	CT	CC	CC	CC	CC	CT	CC	CT	CC	CC	CC	CC
373744	G/A	Unknown	30646955	+	GG	GG	GG	GG	GG	GG	GG	GG	GG	GG	GG	GG	GG	GG	GG	GG	GG	GG	GG	GG	GG	GA	GG	GA	GG	GG	GG	GG	GG	GG	GG	GG	GG	GA	GG	GG	GG	GG	GG	GG	GG	GA	GG	GG	GG
373881	G/C	Unknown	30658170	+	GG	GC	GG	GG	GG	GC	GC	GG	GG	GG	GG	GG	GG	GG	GC	GG	GG	GG	GG	GC	GG	GG	GG	GG	GG	GG	GG	GG	GG	GG	GC	GC	GG	GG	GG	GG	GG	GG	GG	GG	GG	GG	GG	GG	GG
374390	G/A	Unknown	30699916	+	GA	GA	GA	GA	GG	GG	GG	GA	GA	GA	GA	GA	GA	GA	GA	GA	GA	GA	GA	GA	GA	GA	GA	GA	GA	GA	GA	GA	GA	GA	GA	GA	GA	GA	GA	GA	GA	GA	GA	GA	GA	GA	GA	GA	GG
374390	C/T	Unknown	30699929	+	CT	CT	CT	CT	CC	CC	CC	CT	CT	CT	CT	CT	CT	CT	CT	CT	CT	CT	CT	CT	CT	CT	CT	CT	CT	CT	CT	CT	CT	CT	CT	CT	CT	CT	CT	CT	CT	CT	CT	CT	CT	CT	CT	CT	CC
374682	A/G	Unknown	30723888	+	AA	AA	AA	AA	AA	AA	AA	AA	AA	AA	AA	AA	AA	AA	AA	AA	AA	AA	AA	AA	AG	AA	AG	AA	AA	AA	AA	AA	AA	AA	AA	AA	AA	AA	AA	AA	AA	AA	AG	AA	AA	AA	AA	AA	AA
375749	G/A	Unknown	30811359	+	GG	GG	GG	GG	GG	GG	GG	GG	GG	GG	GG	GG	GG	GG	GG	GG	GG	GG	GG	GG	GG	GG	GG	GG	GG	GG	GA	GG	GG	GG	GA	GG	GG	GG	GG	GG	GG	GG	GG	GG	GG	GG	GG	GG	GG
375840	C/T	Unknown	30818839	+	CC	CT	CC	CC	CT	CC	CC	CC	CT	CC	CC	CC	CC	CC	CC	CC	CC	CC	CC	CC	CC	CC	CC	CC	CC	CC	CT	CC	CC	CC	CT	CC	CC	CC	CC	CC	CC	CC	CC	CC	CC	CC	CC	CC	CC
376153	G/A	Unknown	30844511	+	GG	GG	GG	GG	GA	GG	GA	GG	GA	GG	GG	GG	GG	GG	GG	GG	GG	GG	GG	GG	GG	GG	GG	GG	GG	GG	GG	GA	GG	GG	GG	GG	GG	GG	GG	GG	GG	GG	GG	GG	GG	GG	GG	GG	GG
376592	C/G	Unknown	30880503	+	CC	CC	CC	CG	CC	CC	CC	CC	CC	CC	CC	CC	CC	CC	CG	CC	CC	CC	CC	CC	CC	CC	CC	CC	CC	CG	CC	CC	CG	CG	CC	CC	CC	CC	CC	CC	CC	CG	CC	CC	CC	CC	CC	CC	CC
377100	C/A	Unknown	30922149	+	CC	CC	CC	CC	CC	CC	CC	CC	CC	CC	CC	CC	CA	CC	CC	CC	CC	CC	CC	CC	CC	CC	CC	CC	CC	CC	CA	CC	CC	CC	CC	CC	CC	CC	CC	CC	CC	CC	CC	CC	CC	CC	CC	CC	CC
377234	G/A	Unknown	30933154	+	GG	GG	GG	GA	GG	GA	GG	GG	GA	GG	GG	GG	GG	GG	GG	GG	GG	GG	GG	GG	GG	GA	GG	GG	GG	GG	GG	GG	GG	GA	GG	GG	GG	GG	GG	GG	GG	GG	GG	GG	GG	GG	GG	GG	GA
377835	G/C	Unknown	30982428	+	GG	GG	GG	GG	GG	GG	GG	GG	GG	GC	GG	GG	GG	GG	GG	GG	GG	GG	GG	GG	GG	GG	GG	GG	GG	GG	GG	GG	GG	GG	GG	GG	GG	GG	GG	GG	GG	GG	GG	GG	GG	GG	GG	GG	GG
378092	C/T	Unknown	31003473	+	CC	CC	CC	CC	CC	CC	CC	CC	CC	CC	CC	CC	CC	CC	CC	CC	CC	CC	CC	CC	CC	CC	CC	CC	CC	CT	CC	CC	CC	CC	CC	CC	CC	CC	CC	CC	CC	CC	CC	CC	CC	CC	CC	CC	CC
378648	G/T	Unknown	31049085	+	GT	GT	GT	GT	GT	GG	GT	GT	GT	GG	GT	GT	GT	GT	GT	GT	GT	GT	GT	GT	GT	GT	GT	GT	GT	GT	GT	GT	GT	GT	GT	GT	GT	GT	GT	GT	GT	GT	GT	GT	GT	GG	GT	GT	GT
378663	A/G	Unknown	31050300	+	AA	AG	AA	AA	AA	AA	AA	AA	AG	AA	AA	AA	AA	AA	AG	AA	AG	AA	AA	AA	AA	AA	AA	AG	AG	AA	AG	AA	AA	AG	AA	AG	AA	AA	AA	AA	AA	AG	AA	AA	AG	AA	AG	AA	AA
378663	C/T	Unknown	31050304	+	CC	CT	CC	CC	CC	CC	CC	CC	CT	CC	CC	CC	CC	CC	CT	CC	CT	CC	CC	CC	CC	CC	CC	CT	CT	CC	CT	CC	CC	CT	CC	CT	CC	CC	CC	CC	CC	CT	CC	CC	CT	CC	CT	CC	CC
378729	T/C	Unknown	31055753	+	TT	TT	TT	TT	TT	TT	TT	TT	TT	TT	TT	TT	TT	TT	TT	TT	TT	TT	TT	TT	TT	TT	TT	TT	TT	TT	TT	TT	TT	TT	TT	TT	TT	TT	TT	TT	TT	TT	TT	TT	TT	TT	TT	TT	TT
379443	C/A	Unknown	31114280	+	CA	CC	CC	CC	CC	CC	CC	CA	CC	CC	CC	CC	CC	CC	CC	CC	CC	CC	CC	CA	CC	CC	CC	CA	CC	CC	CC	CC	CC	CC	CC	CC	CC	CC	CC	CC	CC	CC	CC	CA	CC	CC	CC	CC	CC
379443	G/A	Unknown	31114282	+	GA	GA	GA	GA	GA	GA	GA	GA	GA	GA	GA	GA	GA	GA	GA	GA	GA	GA	GA	GA	GA	GA	GA	GA	GA	GA	GA	GA	GA	GA	GA	GA	GA	GA	GA	GA	GA	GA	GA	GA	GA	GA	GA	GA	GA
379727	A/G	Unknown	31137571	+	AA	AA	AA	AA	AA	AA	AA	AG	AA	AA	AA	AA	AA	AA	AA	AA	AG	AA	AA	AA	AA	AA	AA	AA	AA	AA	AA	AA	AA	AA	AA	AA	AA	AA	AA	AA	AA	AA	AA	AG	AA	AA	AA	AA	AA
379866	A/G	Unknown	31148936	+	AG	AG	AG	AG	AG	AG	AG	AG	AG	AG	AG	AG	AG	AG	AG	AG	AG	AG	AG	AG	AG	AG	AG	AG	AG	AG	AG	AG	AG	AG	AG	AG	AG	AG	AG	AG	AG	AG	AG	AG	AG	AG	AG	AG	AG
379866	A/T	Unknown	31148952	+	AA	AT	AT	AT	AT	AT	AT	AA	AT	AT	AT	AT	AT	AA	AT	AT	AT	AT	AT	AT	AT	AT	AT	AT	AT	AT	AT	AT	AT	AA	AT	AT	AT	AT	AT	AT	AT	AT	AT	AT	AT	AT	AT	AT	AT
381629	T/C	Unknown	31293528	+	TT	TC	TT	TT	TC	TC	TC	TC	TC	TC	TC	TC	TC	TC	TC	CC	TC	TC	TC	TC	TC	TC	TC	TC	TC	TC	TC	TC	TC	TT	TC	TC	TC	TC	TC	TC	TC	TC	TC	TC	TC	TT	TC	TC	TC
382168	C/A	Unknown	31337720	+	CA	CA	CA	CA	CA	CA	CC	CA	CA	CA	CA	CA	CA	CA	CA	CA	CA	CA	CC	CA	CC	CA	CA	CA	CA	CA	CA	CA	CC	CA	CC	CA	CA	CA	CA	CA	CA	CC	CC	CA	CA	CA	CA	CA	CC
382353	C/G	Unknown	31352871	+	CC	CC	CG	CC	CC	CC	CC	CC	CC	CC	CC	CC	CC	CC	CC	CC	CC	CC	CC	CC	CC	CC	CG	CC	CC	CC	CC	CC	CC	CC	CC	CC	CC	CC	CC	CC	CC	CC	CC	CG	CC	CG	CC	CC	CC
382353	G/T	Unknown	31352889	+	GG	GG	GT	GG	GG	GG	GG	GG	GG	GG	GG	GG	GG	GG	GG	GG	GG	GG	GG	GG	GG	GG	GT	GG	GG	GG	GG	GG	GG	GG	GG	GG	GG	GG	GG	GG	GG	GG	GG	GT	GG	GT	GG	GG	GG
382506	G/A	Unknown	31365426	+	GA	GA	GA	GA	GA	GG	GA	GG	GA	GA	GA	GA	GA	GA	GA	GA	GA	GA	GA	GA	GA	GA	GG	GA	GA	GA	GG	GA	GA	GA	GA	GA	GA	GA	GA	GA	GA	GG	GA	GA	GA	GA	GA	GA	GG
382506	G/A	Unknown	31365448	+	GA	GA	GA	GA	GG	GA	GA	GA	GG	GA	GA	GA	GA	GA	GA	GA	GA	GA	GA	GA	GA	GA	GA	GA	GA	GA	GA	GA	GA	GA	GA	GG	GA	GA	GA	GA	GA	GA	GA	GA	GA	GA	GA	GA	GA
382538	G/A	Unknown	31368090	+	GG	GG	GG	GG	GG	GG	GG	GG	GA	GG	GG	GG	GG	GG	GG	GG	GG	GG	GG	GG	GG	GG	GG	GG	GG	GG	GG	GG	GG	GG	GG	GG	GG	GG	GG	GG	GG	GG	GG	GG	GG	GG	GG	GG	GG
382626	T/C	Unknown	31375277	+	TT	TT	TT	TT	TT	TT	TT	TT	TT	TT	TT	TT	TT	TT	TC	TT	TT	TT	TT	TT	TT	TT	TT	TT	TT	TT	TT	TT	TT	TT	TT	TT	TT	TT	TT	TT	TT	TC	TT	TT	TT	TT	TT	TT	TT
382626	C/A	Unknown	31375290	+	CA	CC	CA	CA	CA	CA	CA	CA	CA	CA	CA	CA	CA	CA	CC	CA	CA	CA	CA	CA	CA	CA	CC	CC	CA	CA	CA	CA	CA	CA	CA	CA	CA	CA	CA	CA	CA	CA	CA	CA	CA	CC	CA	CA	CA
382759	C/G	Unknown	31386186	+	CC	CC	CC	CC	CC	CC	CC	CC	CC	CG	CC	CC	CC	CC	CC	CC	CC	CC	CC	CC	CC	CC	CG	CC	CC	CC	CC	CC	CC	CC	CC	CC	CC	CG	CC	CC	CG	CC	CC	CC	CC	CC	CC	CC	CC
383088	G/A	Unknown	31413153	+	GG	GG	GG	GG	GG	GG	GG	GG	GG	GG	GG	GG	GG	GG	GG	GG	GG	GG	GG	GG	GG	GG	GA	GG	GA	GG	GG	GG	GG	GG	GG	GG	GG	GG	GG	GG	GG	GG	GG	GG	GG	GG	GG	GG	GG
383167	A/G	Unknown	31419690	+	AA	AA	AA	AA	AA	AA	AA	AA	AA	AA	AA	AA	AA	AA	AA	AA	AA	AA	AA	AA	AA	AA	AA	AA	AA	AA	AA	AA	AA	AA	AA	AA	AA	AA	AA	AA	AA	AA	AG	AA	AA	AA	AA	AA	AA
383626	C/G	Unknown	31457301	+	CC	CC	CC	CG	CC	CC	CC	CC	CG	CC	CC	CC	CC	CC	CC	CC	CC	CC	CC	CG	CC	CC	CC	CC	CC	CC	CC	CC	CG	CC	CC	CC	CC	CC	CC	CC	CC	CC	CC	CC	CC	CC	CG	CC	CC
383890	T/C	Unknown	31478937	+	TT	TT	TT	TT	TT	TT	TT	TT	TT	TT	TT	TT	TT	TT	TT	TT	TT	TT	TT	TT	TT	TT	TT	TT	TT	TT	TT	TT	TC	TT	TT	TT	TT	TC	TT	TT	TT	TT	TT	TT	TT	TT	TT	TT	TT
383890	C/G	Unknown	31478942	+	CC	CC	CC	CC	CC	CG	CC	CC	CC	CC	CC	CC	CC	CC	CG	CC	CC	CC	CC	CC	CC	CC	CC	CC	CC	CG	CG	CC	CC	CC	CC	CC	CC	CC	CC	CC	CC	CC	CG	CC	CC	CC	CC	CC	CC
384465	G/C	Unknown	31526107	+	GC	GG	GG	GG	GG	GG	GG	GG	GG	GG	GG	GG	GG	GG	GG	GG	GG	GG	GG	GG	GG	GG	GG	GC	GC	GC	GG	GG	GG	GG	GG	GG	GG	GG	GG	GG	GG	GG	GG	GC	GG	GG	GG	GG	GG
384750	G/C	Unknown	31549434	+	GG	GG	GG	GG	GG	GG	GC	GG	GG	GG	GG	GG	GG	GG	GG	GG	GG	GG	GG	GG	GG	GG	GG	GG	GG	GG	GG	GC	GG	GG	GG	GG	GG	GG	GG	GG	GG	GG	GG	GC	GG	GG	GG	GG	GG
384768	G/A	Unknown	31550917	+	GG	GG	GG	GG	GG	GG	GG	GG	GG	GG	GG	GG	GG	GG	GG	GG	GG	GG	GG	GG	GG	GG	GA	GG	GG	GG	GG	GG	GG	GG	GG	GG	GG	GG	GG	GG	GG	GG	GG	GG	GA	GG	GA	GG	GG
385054	C/T	Unknown	31574377	+	CC	CC	CC	CC	CT	CC	CC	CC	CT	CC	CC	CC	CC	CC	CC	CC	CC	CC	CC	CC	CC	CC	CT	CC	CC	CC	CC	CC	CT	CT	CC	CC	CC	CC	CC	CC	CC	CC	CC	CT	CC	CC	CC	CC	CC
385054	C/G	Unknown	31574384	+	CC	CC	CC	CG	CC	CC	CC	CC	CC	CC	CC	CC	CC	CC	CC	CC	CC	CC	CC	CC	CC	CC	CC	CC	CG	CC	CG	CG	CC	CC	CC	CC	CC	CC	CC	CC	CC	CC	CC	CC	CC	CC	CC	CC	CC
385317	C/T	Unknown	31595953	+	CC	CC	CC	CC	CC	CC	CT	CC	CC	CC	CC	CC	CT	CC	CC	CC	CC	CC	CC	CC	CC	CC	CC	CC	CC	CC	CC	CC	CC	CC	CC	CC	CC	CC	CC	CC	CC	CC	CC	CC	CC	CC	CT	CC	CC
385518	C/G	Unknown	31612449	+	CC	CC	CC	CC	CC	CC	CC	CC	CC	CC	CC	CC	CG	CC	CC	CC	CC	CC	CC	CC	CC	CC	CC	CC	CC	CC	CC	CC	CC	CC	CC	CG	CC	CC	CC	CC	CC	CC	CC	CC	CC	CC	CG	CC	CG
385907	G/A	Unknown	31644299	+	GA	GA	GG	GA	GG	GG	GA	GA	GA	GA	GA	GA	GA	GG	GA	GA	GA	GA	GA	GA	GA	GA	GA	GA	GA	GA	GA	GA	GA	GG	GA	GA	GA	GA	GA	GA	GA	GA	GA	GA	GA	GG	GA	GA	GA
386113	C/T	Unknown	31661234	+	CT	CC	CC	CC	CC	CC	CC	CC	CC	CC	CC	CC	CT	CC	CC	CC	CC	CC	CC	CC	CC	CC	CC	CC	CC	CC	CC	CC	CC	CC	CT	CC	CC	CC	CC	CC	CC	CT	CT	CC	CC	CT	CC	CC	CC
386146	C/G	Unknown	31663973	+	CC	CC	CC	CC	CC	CC	CC	CG	CG	CC	CC	CC	CC	CC	CC	CC	CC	CC	CC	CC	CC	CC	CC	CC	CC	CC	CC	CC	CC	CC	CC	CC	CC	CC	CC	CC	CC	CC	CC	CC	CC	CC	CC	CC	CC
386557	T/C	Unknown	31697623	+	TT	TT	TT	TT	TT	TT	TT	TT	TT	TT	TT	TT	TT	TT	TT	TT	TT	TT	TT	TT	TT	TT	TT	TT	TT	TT	TT	TT	TT	TT	TT	TT	TT	TT	TT	TT	TT	TT	TT	TT	TT	TT	TT	TT	TT
386939	C/A	Unknown	31728965	+	CC	CC	CC	CC	CC	CA	CC	CC	CA	CC	CC	CA	CC	CC	CC	CC	CC	CC	CC	CC	CC	CC	CA	CC	CC	CC	CC	CC	CC	CA	CC	CC	CC	CC	CC	CC	CC	CC	CC	CC	CC	CC	CC	CC	CC
387390	G/A	Unknown	31765925	+	GG	GG	GG	GG	GG	GG	GA	GG	GG	GG	GA	GG	GG	GG	GG	GG	GG	GG	GG	GG	GG	GG	GG	GG	GG	GG	GG	GG	GA	GG	GA	GG	GG	GG	GG	GG	GG	GG	GG	GG	GG	GG	GA	GG	GG
387707	G/A	Unknown	31791911	+	GA	GA	GA	GA	GA	GA	GA	GA	GA	GA	GG	GA	GA	GA	GA	GA	GA	GG	GA	GA	GA	GA	GA	GA	GA	GA	GA	GA	GA	GA	GA	GA	GA	GA	GA	GA	GA	GA	GA	GA	GA	GA	GA	GA	GA
387925	C/G	Unknown	31809782	+	CC	CC	CC	CC	CC	CC	CC	CC	CC	CC	CC	CC	CC	CC	CC	CC	CC	CC	CC	CC	CC	CC	CC	CC	CC	CC	CC	CG	CC	CC	CC	CC	CC	CC	CC	CC	CC	CC	CC	CC	CC	CC	CC	CC	CC
387938	A/G	Unknown	31810846	+	AA	AG	AA	AA	AG	AA	AA	AA	AA	AG	AG	AA	AA	AA	AA	AA	AG	AA	AA	AA	AA	AG	AG	AG	AG	AG	AA	AA	AG	AG	AG	AA	AA	AA	AA	AA	AA	AG	AG	AA	AA	AA	AG	AA	AA
387938	C/A	Unknown	31810860	+	CC	CA	CC	CC	CA	CC	CC	CC	CC	CA	CA	CC	CC	CC	CC	CC	CA	CC	CC	CC	CC	CA	CA	CA	CA	CA	CC	CC	CA	CA	CA	CC	CC	CC	CC	CC	CC	CA	CA	CC	CC	CC	CA	CC	CC
387957	C/T	Unknown	31812444	+	CC	CC	CC	CC	CC	CT	CC	CC	CC	CC	CC	CC	CC	CC	CC	CC	CC	CT	CC	CC	CC	CC	CC	CC	CC	CC	CC	CC	CC	CC	CT	CC	CC	CC	CC	CC	CC	CC	CC	CC	CC	CC	CC	CC	CT
388041	G/A	Unknown	31819298	+	GA	GG	GG	GG	GG	GG	GG	GG	GG	GG	GG	GG	GG	GG	GG	GG	GG	GG	GG	GG	GG	GG	GG	GA	GG	GG	GG	GG	GG	GG	GA	GG	GG	GG	GG	GG	GG	GG	GG	GG	GG	GG	GG	GG	GG
388201	G/T	Unknown	31832416	+	GG	GG	GG	GG	GG	GT	GG	GG	GG	GG	GG	GG	GG	GG	GG	GG	GG	GG	GG	GG	GG	GT	GT	GG	GG	GG	GG	GG	GG	GG	GT	GG	GT	GG	GG	GG	GG	GG	GT	GG	GT	GG	GG	GG	GG
388635	G/A	Unknown	31868026	+	GG	GG	GG	GG	GG	GG	GG	GG	GG	GG	GG	GG	GG	GG	GG	GG	GG	GG	GG	GG	GG	GG	GG	GA	GG	GG	GG	GG	GG	GA	GG	GG	GA	GG	GG	GG	GG	GG	GG	GA	GG	GG	GG	GG	GG
389142	C/T	Unknown	31909571	+	CC	CC	CC	CC	CC	CC	CC	CT	CC	CC	CC	CC	CC	CC	CC	CC	CC	CC	CC	CC	CC	CC	CC	CT	CC	CT	CT	CC	CC	CT	CC	CC	CC	CC	CC	CC	CC	CC	CT	CC	CC	CC	CC	CC	CC
390100	A/C	Unknown	31988201	+	AA	AA	AA	AA	AA	AA	AA	AA	AA	AA	AA	AA	AA	AA	AA	AA	AA	AA	AA	AA	AA	AA	AA	AA	AA	AA	AA	AA	AA	AA	AA	AA	AA	AA	AA	AA	AA	AA	AA	AA	AA	AA	AA	AA	AA
390224	C/G	Unknown	31998306	+	CC	CC	CC	CC	CG	CC	CC	CC	CC	CC	CG	CC	CC	CG	CC	CC	CC	CC	CC	CC	CC	CC	CC	CC	CC	CC	CC	CC	CC	CC	CC	CC	CC	CC	CC	CC	CC	CC	CC	CC	CC	CC	CG	CC	CC
390224	C/T	Unknown	31998335	+	CC	CC	CC	CC	CC	CC	CC	CC	CT	CC	CC	CC	CC	CC	CC	CC	CC	CC	CC	CC	CC	CC	CC	CC	CC	CC	CC	CC	CC	CT	CC	CT	CC	CC	CC	CC	CC	CC	CC	CC	CC	CT	CC	CC	CT
390557	A/G	Unknown	32025631	+	AG	AG	AG	AG	AG	AG	AG	AG	AG	AG	AG	AG	AG	AA	AG	AG	AG	AG	AG	AG	AG	AG	AG	AG	AG	AG	AG	AG	AG	AG	AG	AG	AG	AG	AG	AG	AA	AG	AG	AG	AG	AG	AG	AG	AA
390835	G/A	Unknown	32048452	+	GG	GG	GG	GG	GG	GG	GA	GG	GA	GG	GG	GG	GG	GG	GG	GG	GG	GG	GG	GG	GG	GG	GG	GG	GG	GG	GG	GG	GG	GG	GG	GG	GG	GA	GG	GG	GG	GG	GG	GG	GG	GG	GG	GG	GG
390925	G/A	Unknown	32055809	+	AG	AG	AG	AG	AG	AG	AG	AG	AG	AG	AG	AG	GG	AG	AG	AG	AG	AG	AG	AG	AG	AG	AG	AG	AG	AG	AG	AG	AG	AG	AG	AG	AG	AG	AG	AG	AG	AG	AG	AG	AG	AG	AG	AG	AG
391003	C/A	Unknown	32062174	+	CC	CC	CC	CC	CC	CC	CC	CC	CA	CC	CC	CA	CC	CC	CC	CC	CC	CC	CC	CC	CC	CC	CC	CC	CC	CC	CC	CC	CC	CC	CA	CC	CC	CC	CC	CC	CC	CC	CC	CC	CC	CC	CC	CC	CC
391110	C/T	Unknown	32070979	+	CC	CC	CC	CC	CC	CC	CT	CT	CT	CC	CC	CC	CC	CC	CC	CC	CC	CC	CC	CC	CC	CC	CC	CC	CC	CC	CC	CC	CC	CC	CC	CC	CC	CT	CC	CC	CC	CC	CT	CC	CC	CC	CC	CC	CC
391334	G/A	Unknown	32089325	+	GG	GG	GG	GG	GG	GG	GG	GG	GG	GG	GG	GG	GG	GG	GG	GG	GG	GG	GG	GG	GG	GG	GG	GG	GG	GG	GG	GG	GG	GG	GA	GG	GG	GG	GG	GG	GG	GG	GG	GG	GG	GG	GG	GG	GG
391535	G/C	Unknown	32105795	+	GC	GC	GC	GC	GG	GC	GG	GC	GC	GC	GC	GC	GC	GC	GC	GC	GC	GC	GG	GC	GC	GG	GC	GC	GG	GC	GC	GC	GC	GC	GC	GC	GC	GC	GG	GC	GC	GC	GC	GC	GG	GC	GC	GC	GC
391535	A/T	Unknown	32105818	+	AT	AT	AT	AT	AA	AT	AA	AT	AT	AT	AT	AT	AT	AT	AT	AT	AT	AT	AA	AT	AT	AA	AT	AT	AA	AT	AT	AT	AT	AT	AT	AT	AT	AT	AA	AT	AT	AT	AT	AT	AA	AT	AT	AT	AT
392797	C/G	Unknown	32209355	+	CC	CC	CC	CC	CC	CC	CC	CG	CG	CC	CC	CC	CC	CC	CC	CC	CC	CC	CC	CC	CC	CC	CC	CC	CC	CC	CC	CC	CC	CC	CC	CC	CC	CC	CC	CC	CC	CC	CC	CC	CC	CC	CC	CC	CC
393341	G/C	Unknown	32253913	+	GG	GG	GC	GG	GG	GG	GG	GG	GG	GG	GG	GC	GG	GG	GG	GG	GG	GG	GG	GG	GG	GG	GG	GG	GC	GG	GG	GC	GC	GC	GG	GG	GG	GG	GG	GG	GG	GG	GG	GG	GG	GG	GG	GG	GG
394125	C/T	Unknown	32318191	+	CC	CC	CC	CC	CC	CC	CC	CC	CC	CC	CC	CC	CC	CC	CC	CC	CC	CC	CC	CC	CC	CC	CC	CC	CC	CC	CC	CC	CC	CC	CT	CC	CC	CC	CC	CC	CC	CC	CC	CC	CC	CC	CC	CC	CC
394417	G/A	Unknown	32342165	+	GG	GG	GG	GG	GG	GG	GA	GA	GG	GG	GA	GA	GG	GG	GG	GG	GG	GG	GG	GG	GG	GG	GG	GG	GG	GA	GG	GG	GG	GG	GG	GA	GG	GA	GG	GG	GG	GA	GA	GA	GG	GG	GG	GG	GG
396183	G/A	Unknown	32486930	+	GG	GG	GG	GG	GG	GG	GA	GG	GG	GG	GG	GG	GG	GG	GG	GG	GG	GG	GG	GG	GG	GG	GG	GG	GG	GA	GG	GG	GG	GG	GG	GG	GG	GG	GG	GG	GG	GG	GG	GG	GG	GG	GG	GG	GG
396183	C/T	Unknown	32486937	+	CC	CC	CC	CC	CC	CC	CC	CC	CC	CC	CT	CC	CC	CC	CC	CC	CC	CC	CC	CC	CC	CC	CC	CC	CC	CC	CT	CC	CT	CC	CT	CC	CC	CC	CC	CC	CC	CC	CC	CC	CC	CC	CC	CC	CC
396436	C/T	Unknown	32507699	+	CC	CT	CT	CT	CT	CT	CC	CC	CC	CT	CT	CT	CT	CT	CT	CT	CT	CT	CT	CT	CT	CC	CT	CT	CT	CT	CT	CC	CT	CT	CT	CT	CT	CT	CC	CT	CT	CT	CC	CC	CT	CT	CT	CT	CT
396643	C/T	Unknown	32524672	+	CC	CC	CC	CC	CC	CC	CC	CC	CC	CT	CT	CC	CC	CC	CC	CT	CC	CC	CC	CC	CC	CC	CC	CC	CC	CC	CC	CC	CC	CC	CC	CC	CC	CC	CC	CT	CC	CC	CC	CC	CC	CC	CC	CC	CC
397088	C/T	Unknown	32561147	+	CC	CT	CC	CC	CC	CT	CC	CT	CC	CC	CT	CC	CC	CC	CC	CC	CC	CC	CC	CC	CC	CC	CT	CC	CC	CC	CC	CC	CC	CC	CC	CC	CC	CC	CC	CC	CT	CC	CC	CC	CC	CT	CC	CC	CC
398384	G/A	Unknown	32667438	+	GG	GG	GG	GG	GG	GG	GG	GG	GA	GG	GG	GG	GG	GG	GG	GG	GA	GG	GG	GG	GG	GG	GG	GG	GA	GG	GG	GA	GG	GG	GG	GA	GG	GG	GG	GG	GG	GG	GG	GG	GG	GG	GG	GG	GG
399655	C/T	Unknown	32771685	+	CC	CC	CC	CC	CC	CC	CC	CC	CC	CC	CC	CC	CC	CC	CC	CC	CC	CC	CC	CC	CC	CC	CC	CC	CC	CC	CC	CC	CC	CC	CT	CC	CC	CC	CC	CC	CT	CC	CC	CC	CT	CC	CC	CC	CC
402080	A/C	Unknown	32970497	+	AA	AA	AA	AA	AA	AA	AA	AA	AA	AA	AA	AC	AA	AA	AA	AA	AA	AC	AA	AA	AA	AA	AA	AA	AA	AA	AA	AA	AA	AA	AA	AC	AA	AA	AA	AA	AA	AC	AC	AA	AA	AC	AA	AA	AA
402376	C/T	Unknown	32994792	+	CC	CC	CC	CC	CC	CC	CC	CC	CC	CC	CC	CC	CC	CC	CC	CC	CC	CC	CC	CC	CC	CC	CC	CC	CC	CC	CT	CT	CC	CC	CC	CC	CC	CC	CC	CC	CC	CC	CC	CC	CC	CC	CC	CC	CC
402554	C/T	Unknown	33009361	+	CC	CC	CC	CC	CC	CC	CC	CC	CC	CC	CC	CC	CC	CC	CC	CC	CC	CC	CC	CC	CT	CC	CC	CC	CC	CT	CC	CC	CC	CC	CC	CC	CC	CC	CC	CC	CC	CC	CC	CC	CC	CC	CC	CC	CC
402554	T/C	Unknown	33009380	+	TT	TT	TT	TT	TT	TT	TT	TT	TT	TT	TT	TT	TT	TT	TT	TT	TT	TT	TT	TT	TC	TT	TT	TT	TT	TC	TT	TT	TT	TT	TT	TT	TT	TT	TT	TT	TT	TT	TT	TT	TT	TT	TT	TT	TT
403693	T/C	Unknown	33102752	+	TT	TT	TT	TC	TT	TT	TT	TT	TT	TT	TT	TT	TC	TC	TT	TT	TC	TT	TT	TT	TT	CC	TT	TT	TT	TT	TT	TT	TT	TT	TT	TT	TT	TT	TT	TT	TT	TT	TC	TT	TT	TC	TT	TT	TC
405171	C/T	Unknown	33223997	+	CT	CC	CT	CT	CT	CT	CT	CT	CT	CT	CT	CT	CT	CT	CT	CT	CC	CT	CT	CT	CC	CT	CT	CT	CC	CT	CT	CT	CT	CT	CT	CT	CT	CT	CT	CT	CT	CT	CT	CT	CC	CT	CT	CT	CT
407974	C/G	Unknown	33453818	+	CC	CC	CC	CC	CG	CC	CC	CC	CC	CC	CG	CC	CC	CC	CC	CC	CC	CC	CC	CC	CC	CC	CC	CG	CC	CC	CG	CC	CC	CC	CC	CG	CC	CC	CC	CC	CC	CC	CC	CC	CC	CG	CC	CC	CC
407974	C/G	Unknown	33453821	+	CC	CC	CC	CC	CG	CC	CC	CC	CC	CC	CG	CC	CC	CC	CC	CC	CC	CC	CC	CC	CC	CC	CC	CG	CC	CC	CG	CC	CC	CC	CC	CG	CC	CC	CC	CC	CC	CC	CC	CC	CC	CG	CC	CC	CC
408300	G/A	Unknown	33480554	+	GG	GG	GG	GG	GG	GG	GG	GG	GG	GG	GG	GG	GG	GG	GG	GA	GA	GA	GG	GA	GG	GG	GG	GG	GG	GG	GG	GG	GG	GG	GG	GG	GG	GG	GG	GG	GA	GG	GA	GG	GG	GG	GG	GG	GG
408642	G/A	Unknown	33508603	+	GG	GG	GG	GG	GG	GG	GG	GA	GG	GG	GG	GG	GG	GG	GG	GG	GG	GG	GG	GG	GG	GG	GG	GG	GA	GG	GG	GG	GA	GG	GG	GG	GG	GG	GA	GG	GG	GG	GG	GG	GA	GA	GG	GG	GG
408668	A/T	Unknown	33510727	+	AA	AA	AA	AA	AA	AA	AA	AA	AA	AA	AA	AA	AA	AA	AA	AA	AA	AA	AA	AA	AA	AA	AA	AA	AA	AA	AA	AT	AT	AA	AA	AA	AA	AA	AA	AA	AA	AA	AA	AA	AT	AA	AA	AA	AA
409767	A/G	Unknown	33600841	+	AA	AA	AA	AA	AA	AA	AA	AA	AG	AA	AA	AA	AA	AA	AA	AA	AA	AA	AA	AA	AA	AA	AA	AA	AG	AG	AA	AA	AA	AA	AA	AG	AA	AG	AA	AA	AA	AA	AA	AA	AA	AA	AA	AA	AA
411167	C/T	Unknown	33715644	+	CC	CC	CC	CT	CC	CC	CC	CC	CC	CC	CC	CC	CC	CC	CC	CT	CT	CC	CC	CC	CC	CC	CC	CC	CT	CC	CC	CC	CC	CC	CC	CC	CC	CC	CC	CC	CC	CC	CC	CC	CC	CC	CC	CT	CC
411464	G/C	Unknown	33739977	+	GG	GG	GG	GG	GG	GG	GC	GG	GG	GG	GG	GG	GG	GG	GC	GG	GG	GG	GG	GG	GG	GG	GG	GC	GG	GG	GG	GG	GG	GG	GG	GG	GG	GG	GG	GG	GC	GG	GG	GC	GG	GG	GG	GG	GG
411680	A/T	Unknown	33757693	+	AT	AT	AT	AA	AT	AT	AT	AT	AT	AT	AA	AT	AT	AT	AT	AT	AT	AT	AT	AT	AT	AT	AT	AT	AT	AT	AT	AT	AT	AT	AT	AA	AT	AT	AT	AA	AT	AA	AT	AT	AT	AT	AT	AT	AT
411680	T/C	Unknown	33757702	+	TT	TT	TT	TT	TT	TT	TT	TT	TT	TC	TT	TT	TT	TT	TC	TT	TT	TT	TT	TT	TC	TT	TT	TT	TT	TT	TT	TT	TT	TT	TT	TT	TT	TT	TT	TT	TT	TT	TT	TT	TT	TT	TT	TT	TT
413156	C/T	Unknown	33878759	+	CC	CC	CC	CC	CC	CT	CC	CC	CC	CC	CC	CC	CT	CC	CC	CC	CC	CC	CC	CC	CC	CC	CC	CC	CC	CC	CC	CC	CC	CC	CC	CC	CC	CC	CC	CC	CC	CC	CC	CC	CC	CC	CC	CC	CC
417226	G/T	Unknown	34212473	+	GG	GG	GG	GG	GG	GG	GG	GG	GT	GG	GG	GG	GG	GG	GG	GG	GG	GG	GG	GG	GG	GG	GT	GG	GT	GG	GG	GG	GG	GG	GT	GT	GG	GG	GG	GG	GG	GT	GG	GG	GG	GG	GG	GG	GG
417978	C/A	Unknown	34274140	+	CC	CA	CC	CC	CC	CC	CC	CC	CC	CC	CC	CC	CC	CC	CC	CC	CC	CC	CC	CC	CC	CC	CC	CC	CC	CC	CC	CC	CC	CC	CC	CC	CC	CC	CC	CC	CC	CC	CC	CC	CC	CC	CC	CC	CC
419843	C/G	Unknown	34427054	+	CC	CC	CC	CC	CC	CC	CC	CG	CC	CC	CC	CC	CC	CC	CC	CC	CC	CC	CC	CC	CC	CC	CC	CC	CC	CC	CC	CC	CC	CG	CG	CC	CC	CC	CC	CC	CC	CC	CC	CC	CC	CC	CC	CC	CC
425076	C/T	Unknown	34856198	+	CC	CT	CT	CT	CT	CC	CC	CC	CC	CT	CT	CT	CT	CT	CC	CC	CT	CT	CT	CT	CT	CT	CC	CC	CC	CT	CC	CC	CT	CT	CT	CC	CT	CT	CC	CT	CT	CC	CT	CC	CC	CC	CC	CT	CT
426161	G/A	Unknown	34945130	+	GG	GG	GA	GG	GG	GG	GG	GG	GG	GG	GG	GG	GA	GG	GG	GG	GG	GG	GG	GG	GG	GG	GG	GG	GG	GG	GG	GG	GG	GG	GG	GG	GG	GG	GG	GG	GG	GG	GG	GG	GG	GG	GG	GG	GG
426552	G/A	Unknown	34977207	+	GG	GG	GG	GG	GG	GG	GG	GG	GG	GG	GG	GG	GG	GG	GA	GG	GG	GG	GG	GG	GG	GA	GG	GA	GG	GG	GG	GG	GG	GA	GG	GG	GG	GG	GG	GG	GG	GG	GA	GG	GG	GG	GG	GG	GG
427543	C/G	Unknown	35058454	+	CG	CG	CG	CG	CG	CG	CG	CG	CC	CC	CG	CG	CG	CG	CC	CG	CG	CG	CG	CG	CG	CG	CC	CG	CG	CG	CG	CG	CG	CG	CG	CG	CG	CG	CG	CG	CG	CC	CG	CC	CG	CG	CC	CG	CG
428224	A/G	Unknown	35114326	+	AA	AA	AA	AA	AA	AG	AA	AA	AA	AA	AA	AA	AG	AA	AA	AA	AA	AG	AA	AA	AA	AA	AA	AA	AA	AA	AA	AG	AA	AA	AA	AA	AA	AG	AA	AA	AA	AA	AA	AA	AA	AA	AA	AA	AG
433509	G/A	Unknown	35547677	+	GG	GG	GG	GG	GG	GG	GG	GG	GA	GG	GG	GG	GG	GG	GG	GG	GG	GG	GG	GA	GG	GG	GG	GG	GG	GG	GG	GG	GG	GG	GG	GG	GG	GG	GG	GG	GA	GG	GG	GG	GG	GG	GG	GG	GG
433509	C/T	Unknown	35547691	+	CC	CC	CC	CC	CC	CT	CC	CC	CC	CC	CC	CC	CC	CC	CC	CC	CC	CC	CC	CC	CC	CC	CC	CC	CT	CC	CC	CC	CC	CC	CC	CT	CC	CC	CC	CC	CC	CC	CC	CC	CC	CC	CC	CC	CC
433931	G/C	Unknown	35582270	+	GG	GG	GG	GG	GG	GG	GG	GG	GG	GG	GG	GG	GG	GG	GG	GG	GG	GC	GG	GG	GG	GG	GG	GG	GG	GG	GG	GG	GG	GG	GG	GG	GG	GG	GG	GG	GG	GG	GG	GC	GG	GG	GG	GG	GG
433931	C/A	Unknown	35582288	+	CC	CC	CC	CA	CC	CC	CA	CC	CC	CC	CC	CC	CC	CC	CC	CC	CC	CC	CC	CC	CC	CC	CC	CA	CA	CC	CC	CC	CA	CC	CC	CA	CC	CC	CC	CC	CC	CA	CC	CA	CA	CC	CC	CC	CC
433934	G/C	Unknown	35582533	+	GG	GG	GG	GG	GG	GG	GG	GG	GC	GG	GG	GG	GG	GG	GG	GG	GG	GG	GG	GG	GC	GG	GC	GG	GG	GG	GG	GG	GG	GG	GG	GC	GG	GG	GG	GG	GG	GG	GG	GG	GG	GG	GG	GG	GG
434501	G/T	Unknown	35629035	+	GG	GT	GG	GG	GG	GG	GT	GG	GT	GT	GG	GG	GG	GG	GG	GG	GG	GG	GG	GG	GG	GG	GG	GG	GG	GG	GG	GG	GG	GG	GG	GG	GG	GG	GG	GG	GG	GG	GG	GG	GG	GG	GG	GG	GG
434892	A/G	Unknown	35661091	+	AA	AA	AA	AA	AA	AA	AA	AA	AA	AA	AA	AA	AA	AA	AA	AA	AA	AG	AA	AG	AA	AA	AA	AA	AA	AA	AA	AG	AA	AA	AA	AA	AA	AA	AA	AA	AA	AA	AA	AA	AA	AA	AG	AA	AA
443598	T/C	Unknown	36374982	+	TC	TT	TT	TT	TT	TT	TC	TT	TT	TT	TT	TT	TT	TT	TT	TT	TC	TT	TT	TT	TC	TT	TT	TT	TT	TT	TT	TT	TT	TT	TT	TC	TT	TT	TT	TT	TT	TT	TT	TT	TT	TC	TT	TT	TC
446550	C/T	Unknown	36617037	+	CC	CC	CC	CC	CC	CC	CC	CC	CC	CC	CC	CC	CC	CC	CC	CC	CC	CC	CC	CC	CC	CC	CC	CC	CC	CC	CC	CC	CC	CC	CC	CC	CC	CC	CC	CC	CC	CC	CC	CC	CC	CT	CC	CC	CC
446550	G/C	Unknown	36617043	+	GG	GG	GG	GG	GG	GG	GG	GG	GG	GG	GG	GG	GG	GG	GG	GG	GG	GG	GG	GG	GG	GG	GG	GG	GG	GG	GG	GG	GG	GG	GG	GG	GG	GG	GG	GG	GG	GG	GG	GG	GG	GC	GG	GG	GG
446657	A/G	Unknown	36625811	+	AG	AG	AG	AG	AG	AG	AG	AG	AG	AG	AG	AG	AG	AG	AG	AG	AG	AG	AG	AG	AG	AG	AA	AG	AG	AG	AG	AG	AG	AG	AG	AG	AG	AG	AG	AG	AG	AG	AG	AG	AG	AG	AG	AG	AG
449242	G/C	Unknown	36837773	+	GG	GG	GG	GG	GG	GG	GG	GG	GG	GG	GG	GC	GG	GG	GG	GG	GG	GG	GG	GG	GG	GG	GG	GG	GG	GG	GG	GG	GG	GG	GG	GG	GG	GG	GG	GG	GG	GG	GC	GG	GG	GG	GC	GG	GG
453299	T/A	Unknown	37170451	+	TT	TT	TT	TT	TT	TT	TT	TT	TT	TT	TT	TT	TT	TT	TT	TT	TT	TT	TT	TT	TT	TT	TT	TT	TA	TT	TT	TT	TA	TT	TT	TT	TT	TT	TT	TT	TA	TT	TT	TT	TT	TT	TT	TA	TA
453299	C/T	Unknown	37170457	+	CT	CT	CT	CT	CT	CT	CT	CT	CT	CT	CT	CT	CT	CT	CT	CT	CT	CT	CT	CT	CT	CT	CT	CT	CT	CT	CT	CT	CT	CT	CT	CT	CT	CT	CT	CT	CT	CT	CT	CT	CT	CT	CC	CT	CT
454387	G/C	Unknown	37259685	+	GG	GG	GG	GG	GC	GG	GG	GG	GG	GG	GG	GG	GG	GG	GG	GG	GG	GG	GG	GG	GC	GG	GC	GG	GG	GC	GG	GG	GG	GG	GG	GG	GG	GG	GG	GG	GG	GG	GC	GG	GG	GG	GG	GG	GG
456677	T/G	Unknown	37447446	+	TT	TT	TT	TT	TG	TT	TT	TT	TT	TT	TT	TT	TT	TT	TT	TT	TT	TT	TT	TT	TT	TT	TG	TT	TG	TT	TT	TT	TT	TT	TT	TT	TT	TT	TT	TT	TT	TT	TT	TT	TT	TT	TT	TT	TT
456677	G/A	Unknown	37447454	+	GG	GG	GG	GG	GA	GG	GG	GG	GG	GG	GG	GG	GG	GG	GG	GG	GG	GG	GG	GG	GG	GG	GA	GG	GA	GG	GG	GG	GG	GG	GG	GG	GG	GG	GG	GG	GG	GG	GG	GG	GG	GG	GG	GG	GG
462223	G/A	Unknown	37902232	+	GG	GA	GA	GG	GG	GG	GG	GA	GG	GG	GA	GG	GG	GG	GG	GG	GG	GA	GG	GG	GG	GG	GA	GA	GG	GG	GA	GG	GG	GG	GG	GG	GG	GG	GG	GG	GG	GA	GG	GG	GG	GG	GG	GG	GG
476288	T/C	Unknown	39055551	+	TT	TT	TT	TT	TT	TT	TC	TT	TC	TT	TT	TT	TT	TT	TT	TT	TT	TT	TT	TT	TT	TT	TT	TT	TT	TT	TT	TT	TT	TT	TT	TT	TT	TT	TT	TT	TT	TT	TT	TT	TT	TC	TT	TT	TT
476629	G/A	Unknown	39083535	+	GA	GG	GG	GG	GG	GG	GA	GG	GG	GG	GG	GA	GG	GG	GG	GG	GG	GG	GG	GG	GA	GG	GG	GG	GG	GG	GG	GG	GG	GG	GG	GG	GG	GG	GG	GG	GG	GG	GA	GA	GG	GG	GG	GG	GG
476629	T/C	Unknown	39083538	+	TT	TT	TT	TT	TT	TT	TT	TT	TT	TT	TT	TT	TT	TT	TT	TT	TT	TC	TT	TT	TT	TT	TT	TT	TT	TC	TT	TT	TT	TT	TT	TT	TT	TT	TT	TT	TT	TT	TT	TT	TT	TT	TT	TT	TT
493388	G/A	Unknown	40457741	+	GA	GG	GG	GG	GG	GG	GG	GG	GG	GG	GG	GG	GG	GG	GG	GG	GG	GG	GG	GG	GG	GG	GG	GG	GG	GG	GA	GG	GG	GG	GG	GG	GG	GG	GG	GG	GG	GG	GA	GG	GG	GG	GA	GG	GG
501179	A/G	Unknown	41096605	+	AG	AA	AA	AA	AA	AA	AG	AA	AA	AA	AA	AA	AA	AA	AA	AA	AA	AG	AA	AA	AA	AA	AA	AA	AA	AA	AA	AA	AA	AG	AA	AA	AA	AA	AA	AA	AA	AA	AA	AA	AA	AA	AA	AA	AA
518294	G/A	Unknown	42500081	+	GG	GG	GG	GG	GG	GG	GG	GA	GG	GG	GG	GG	GG	GG	GG	GG	GG	GG	GG	GG	GG	GG	GG	GG	GG	GG	GG	GA	GG	GG	GG	GG	GG	GG	GG	GG	GG	GG	GG	GG	GG	GG	GG	GG	GG
522764	T/A	Unknown	42866605	+	TT	TT	TT	TT	TT	TT	TT	TT	TT	TT	TT	TT	TT	TT	TT	TT	TT	TT	TT	TT	TT	TA	TA	TA	TT	TT	TT	TA	TT	TT	TT	TT	TT	TT	TT	TT	TT	TT	TT	TT	TT	TA	TT	TT	TT
536821	C/T	Unknown	44019260	+	CT	CC	CT	CT	CT	CT	CT	CT	CT	CT	CT	CT	CT	CT	CT	CT	CT	CT	CT	CT	CT	CT	CT	CT	CC	CT	CT	CT	CT	CT	CT	CT	CT	CT	CT	CT	CT	CT	CT	CT	CT	CT	CC	CT	CT
537592	A/G	Unknown	44082499	+	AA	AA	AA	AA	AA	AA	AA	AA	AA	AA	AA	AA	AA	AA	AA	AA	AG	AA	AA	AA	AA	AA	AA	AA	AA	AA	AA	AA	AA	AA	AA	AA	AA	AA	AA	AA	AA	AA	AA	AA	AA	AG	AA	AA	AA
537679	C/T	Unknown	44089615	+	CC	CC	CC	CC	CC	CC	CC	CC	CC	CC	CC	CC	CC	CC	CT	CC	CC	CC	CC	CC	CC	CC	CC	CC	CC	CC	CC	CC	CC	CC	CC	CC	CC	CC	CC	CC	CC	CT	CC	CC	CC	CC	CC	CC	CC
537679	C/A	Unknown	44089622	+	CC	CC	CC	CC	CC	CC	CA	CC	CC	CC	CC	CC	CC	CC	CC	CC	CC	CC	CC	CC	CC	CC	CC	CC	CC	CC	CA	CC	CC	CC	CC	CC	CC	CC	CA	CC	CC	CC	CC	CC	CC	CC	CC	CC	CC
538915	C/T	Unknown	44190972	+	CC	CC	CC	CC	CC	CT	CC	CC	CT	CC	CC	CC	CC	CC	CC	CC	CC	CC	CC	CC	CC	CC	CC	CC	CC	CC	CC	CC	CC	CC	CT	CC	CC	CC	CC	CC	CC	CC	CT	CC	CC	CC	CC	CC	CC
538915	C/T	Unknown	44190998	+	CC	CC	CC	CT	CC	CC	CC	CC	CC	CC	CC	CC	CC	CC	CC	CC	CC	CC	CC	CC	CC	CC	CC	CT	CC	CC	CC	CC	CC	CC	CC	CT	CC	CC	CC	CC	CC	CC	CC	CC	CC	CC	CC	CC	CC
539736	C/G	Unknown	44258319	+	CC	CC	CG	CG	CC	CG	CC	CG	CG	CG	CC	CG	CG	CG	CG	CG	CG	CG	CG	CG	CG	CG	CG	CG	CG	CG	CG	CC	CG	CC	CG	CG	CC	CG	CG	CG	CG	CG	CG	CG	CG	CG	CG	CG	CG
539736	G/C	Unknown	44258320	+	GC	GG	GC	GC	GC	GC	GC	GC	GG	GC	GC	GG	GC	GC	GC	GC	GC	GC	GC	GC	GC	GC	GC	GC	GC	GC	GG	GC	GC	GC	GC	GC	GG	GC	GC	GC	GC	GC	GG	GC	GC	GC	GC	GC	GC
539761	G/A	Unknown	44260345	+	GG	GG	GG	GG	GG	GG	GG	GG	GG	GG	GG	GG	GG	GG	GG	GG	GG	GG	GG	GG	GG	GG	GG	GG	GG	GA	GG	GG	GG	GG	GG	GG	GG	GG	GG	GG	GG	GG	GG	GG	GG	GG	GG	GG	GG
539800	C/A	Unknown	44263542	+	CC	CC	CC	CC	CC	CC	CC	CA	CC	CC	CC	CC	CA	CC	CC	CC	CC	CC	CC	CC	CC	CC	CC	CC	CC	CC	CC	CC	CC	CC	CC	CC	CC	CC	CC	CC	CC	CA	CC	CC	CC	CC	CC	CC	CC
539862	C/T	Unknown	44268654	+	CC	CC	CC	CC	CC	CT	CC	CC	CT	CC	CC	CT	CC	CC	CC	CC	CC	CC	CT	CC	CC	CC	CC	CT	CC	CC	CC	CC	CC	CC	CC	CC	CC	CC	CC	CC	CC	CC	CC	CC	CC	CC	CC	CC	CC
540197	C/G	Unknown	44296109	+	CG	CG	CG	CG	CG	CG	CG	CG	CG	CG	CG	CG	CG	CG	CG	CG	CG	CG	CG	CG	CG	CG	CG	CG	CC	CG	CG	CG	CC	CG	CG	CG	CG	CG	CG	CG	CG	CG	CG	CG	CG	CG	CG	CG	CG
540197	C/T	Unknown	44296111	+	CC	CC	CC	CC	CC	CT	CC	CT	CC	CC	CC	CC	CC	CC	CC	CC	CC	CC	CC	CC	CC	CC	CT	CC	CT	CC	CC	CC	CC	CC	CC	CC	CC	CC	CC	CC	CC	CC	CC	CC	CC	CC	CC	CC	CC
540197	T/G	Unknown	44296112	+	TG	TG	TG	TG	TG	TG	TG	TG	TG	TG	TG	TG	TG	TG	TG	TG	TG	TG	TG	TG	TG	TG	TG	TG	TT	TG	TG	TG	TT	TG	TG	TG	TG	TG	TG	TG	TG	TG	TG	TG	TG	TG	TG	TG	TG
540197	G/T	Unknown	44296124	+	GG	GG	GG	GG	GG	GT	GG	GT	GG	GG	GG	GG	GG	GG	GG	GG	GG	GG	GG	GG	GG	GG	GT	GG	GT	GG	GG	GG	GG	GG	GG	GG	GG	GG	GG	GG	GG	GG	GG	GG	GG	GG	GG	GG	GG
540290	C/T	Unknown	44303771	+	CT	CC	CT	CT	CT	CT	CT	CT	CT	CT	CT	CT	CT	CT	CT	CT	CT	CT	CT	CT	CT	CC	CT	CT	CT	CT	CT	CT	CT	CT	CT	CT	CT	CT	CT	CT	CT	CT	CT	CT	CT	CT	CT	CT	CC
541188	A/G	Unknown	44377364	+	AG	AG	AG	AG	AG	AA	AA	AA	AG	AG	AG	AA	AA	AA	AG	AA	AG	AA	AA	AA	AA	AG	AG	AA	AG	AG	AG	AG	AG	AA	AA	AA	AA	AA	AG	AG	AG	AA	AG	AG	AA	AG	AA	AA	AG
541459	A/G	Unknown	44399573	+	AA	AG	AA	AA	AA	AA	AA	AA	AG	AA	AA	AA	AA	AA	AA	AA	AA	AA	AA	AA	AA	AA	AA	AA	AA	AA	AA	AA	AA	AA	AA	AA	AA	AA	AA	AA	AA	AA	AG	AA	AA	AG	AG	AA	AA
541963	C/A	Unknown	44440916	+	CA	CA	CA	CA	CA	CA	CA	CA	CA	CC	CA	CA	CA	CA	CA	CA	CA	CA	CA	CA	CA	CA	CA	CA	CA	CA	CA	CA	CA	CC	CC	CA	CA	CA	CA	CA	CA	CA	CA	CA	CA	CC	CA	CA	CA
541963	G/A	Unknown	44440941	+	GG	GG	GG	GG	GG	GG	GG	GG	GG	GG	GG	GG	GG	GG	GG	GG	GG	GG	GG	GG	GG	GG	GG	GG	GG	GG	GG	GG	GG	GG	GG	GG	GG	GG	GG	GG	GG	GG	GA	GG	GG	GG	GG	GG	GG
541973	C/G	Unknown	44441787	+	CC	CC	CC	CC	CC	CC	CC	CG	CG	CC	CC	CC	CC	CC	CC	CC	CC	CC	CC	CC	CC	CC	CC	CC	CC	CC	CC	CC	CC	CC	CC	CC	CC	CC	CC	CC	CC	CC	CC	CC	CC	CC	CC	CC	CC
542090	C/A	Unknown	44451319	+	CC	CC	CC	CC	CC	CC	CC	CA	CC	CC	CC	CC	CC	CC	CC	CC	CC	CC	CC	CC	CA	CC	CA	CA	CC	CC	CC	CA	CC	CC	CC	CC	CC	CC	CC	CC	CA	CC	CC	CC	CC	CC	CC	CC	CC
542216	C/T	Unknown	44461647	+	CT	CT	CT	CC	CT	CC	CT	CT	CT	CC	CT	CC	CT	CT	CT	CT	CT	CT	CT	CC	CT	CT	CC	CC	CT	CT	CT	CT	CT	CC	CC	CT	CT	CT	CT	CT	CC	CT	CT	CT	CT	CC	CC	CT	CC
542470	C/T	Unknown	44482474	+	CC	CC	CC	CC	CC	CC	CC	CC	CC	CC	CC	CT	CC	CC	CC	CC	CC	CC	CC	CC	CC	CC	CC	CC	CC	CC	CC	CC	CC	CC	CC	CC	CC	CC	CC	CC	CC	CC	CC	CC	CC	CC	CT	CC	CC
542732	G/A	Unknown	44503953	+	GG	GG	GG	GG	GG	GG	GA	GG	GG	GG	GG	GG	GG	GG	GG	GG	GG	GG	GG	GG	GG	GG	GG	GG	GA	GG	GG	GG	GG	GA	GG	GA	GG	GG	GG	GG	GG	GA	GG	GG	GA	GG	GG	GG	GA
542732	G/C	Unknown	44503962	+	GG	GC	GG	GG	GG	GG	GG	GG	GG	GG	GG	GC	GC	GG	GG	GG	GG	GC	GG	GG	GC	GG	GG	GG	GG	GC	GG	GC	GG	GG	GG	GG	GG	GG	GC	GG	GG	GG	GC	GG	GG	GG	GG	GG	GG
542881	C/T	Unknown	44516226	+	CC	CC	CC	CC	CC	CC	CT	CC	CC	CC	CC	CC	CC	CC	CC	CC	CC	CC	CC	CC	CC	CC	CC	CC	CC	CC	CC	CC	CC	CC	CC	CC	CC	CC	CC	CC	CC	CT	CC	CC	CC	CC	CC	CC	CT
542914	A/C	Unknown	44518872	+	AC	AA	AC	AC	AA	AC	AA	AC	AA	AA	AA	AC	AC	AC	AA	AC	AC	AC	AC	AC	AC	AA	AC	AA	AC	AC	AA	AC	AC	AC	AA	AC	AC	AC	AA	AA	AA	AC	AA	AC	AA	AA	AA	AC	AC
542914	T/A	Unknown	44518876	+	TT	TT	TT	TT	TA	TT	TT	TT	TT	TT	TT	TT	TT	TT	TT	TT	TT	TT	TT	TT	TT	TA	TT	TA	TA	TT	TT	TT	TT	TT	TT	TT	TT	TT	TT	TT	TT	TT	TT	TT	TT	TA	TT	TT	TT
542929	A/T	Unknown	44520133	+	AA	AA	AA	AA	AA	AT	AT	AA	AA	AT	AA	AA	AA	AA	AA	AA	AA	AA	AA	AT	AA	AA	AA	AA	AA	AA	AA	AA	AA	AA	AA	AA	AA	AA	AA	AA	AA	AA	AA	AA	AA	AA	AA	AA	AT
542929	G/C	Unknown	44520146	+	GG	GG	GG	GG	GG	GG	GG	GG	GC	GG	GG	GG	GG	GG	GC	GC	GC	GC	GG	GG	GG	GG	GC	GG	GG	GG	GG	GG	GG	GG	GG	GC	GG	GC	GG	GG	GG	GG	GG	GG	GG	GC	GC	GG	GG
543034	G/C	Unknown	44528715	+	GG	GC	GG	GG	GC	GG	GC	GG	GC	GG	GG	GG	GG	GG	GG	GG	GC	GC	GG	GG	GC	GC	GG	GC	GC	GC	GG	GC	GG	GC	GC	GG	GG	GG	GC	GG	GG	GC	GC	GC	GG	GG	GC	GG	GG
543321	C/T	Unknown	44552249	+	CC	CC	CC	CC	CT	CC	CC	CT	CC	CC	CT	CC	CC	CC	CT	CC	CC	CT	CC	CC	CC	CT	CC	CC	CC	CC	CT	CT	CC	CC	CT	CT	CC	CC	CC	CC	CC	CC	CT	CT	CT	CC	CT	CC	CC
543528	G/A	Unknown	44569225	+	GG	GG	GG	GG	GG	GG	GG	GG	GG	GG	GA	GG	GG	GA	GG	GG	GG	GA	GG	GG	GG	GG	GG	GG	GG	GG	GG	GA	GG	GA	GG	GG	GA	GG	GA	GG	GG	GG	GG	GG	GG	GG	GG	GG	GG
543785	G/A	Unknown	44590298	+	GA	GA	GA	GA	GA	GA	GA	GG	GA	GA	GA	GA	GA	GA	GA	GA	GA	GA	GA	GA	GA	GA	GG	GA	GA	GA	GA	GA	GA	GA	GA	GA	GG	AA	GA	GA	GA	GA	GA	GA	GA	GA	GA	GA	GA
543785	G/A	Unknown	44590327	+	GA	GA	GA	GA	GA	GA	GA	GG	GA	GA	GA	GA	GA	GA	GA	GA	GA	GA	GA	GA	GA	GA	GG	GA	GA	GA	GA	GA	GA	GA	GA	GA	GG	AA	GA	GA	GA	GA	GA	GA	GA	GA	GA	GA	GA
543867	G/A	Unknown	44597059	+	GG	GG	GG	GG	GA	GG	GG	GG	GG	GG	GA	GG	GG	GG	GG	GG	GG	GG	GG	GG	GA	GG	GG	GA	GA	GA	GG	GA	GG	GA	GG	GG	GG	GG	GG	GG	GG	GG	GG	GG	GG	GA	GA	GG	GA
544250	G/A	Unknown	44628464	+	GG	GA	GG	GG	GG	GG	GA	GG	GA	GG	GG	GG	GG	GA	GG	GG	GA	GA	GG	GA	GG	GG	GG	GG	GG	GA	GG	GG	GA	GG	GA	GG	GG	GA	GG	GG	GA	GG	GG	GA	GG	GG	GG	GA	GA
544315	A/G	Unknown	44633759	+	AA	AA	AA	AA	AG	AA	AA	AA	AG	AA	AA	AA	AA	AA	AA	AA	AA	AA	AA	AA	AA	AA	AA	AA	AG	AA	AA	AA	AA	AA	AA	AA	AA	AA	AG	AA	AA	AA	AA	AA	AA	AA	AG	AA	AA
544315	G/A	Unknown	44633773	+	GA	GA	GA	GA	GA	GA	GA	GA	GG	GA	GA	GA	GA	GA	GA	GA	GA	GA	GA	GA	GA	GA	GG	GA	GA	GA	GA	GA	GA	GA	GA	GA	GA	GA	GA	GA	GA	GA	GG	GA	GA	GA	GA	GA	GA
544422	G/A	Unknown	44642557	+	GG	GG	GG	GG	GG	GG	GG	GG	GA	GG	GG	GG	GG	GG	GG	GG	GG	GG	GG	GG	GG	GG	GG	GG	GG	GG	GG	GG	GG	GG	GA	GG	GG	GG	GG	GG	GG	GG	GG	GG	GG	GG	GG	GG	GG
544425	G/C	Unknown	44642803	+	GC	GC	GC	GG	GG	GC	GC	GC	GC	GG	GC	GC	GC	GG	GC	GC	GG	GG	GC	GC	GC	GC	GG	GC	GG	GC	GG	GC	GG	GC	GC	GG	GC	GG	GC	GC	GC	GG	GG	GC	GG	GG	GG	GC	GC
544906	G/A	Unknown	44682262	+	GG	GG	GG	GG	GG	GG	GG	GG	GG	GG	GG	GG	GG	GG	GG	GG	GG	GG	GG	GG	GG	GG	GA	GA	GG	GG	GG	GG	GG	GG	GG	GG	GG	GG	GG	GG	GG	GG	GG	GG	GG	GA	GG	GG	GG
545437	G/A	Unknown	44725767	+	GG	GG	GG	GG	GG	GG	GG	GG	GA	GG	GG	GG	GG	GG	GG	GG	GG	GG	GG	GG	GG	GG	GG	GG	GG	GG	GG	GG	GG	GG	GG	GG	GG	GA	GG	GG	GG	GG	GG	GG	GG	GG	GG	GG	GG
545437	C/G	Unknown	44725770	+	CG	CG	CG	CG	CG	CG	CG	CG	CG	CC	CG	CG	CG	CG	CG	CG	CG	CG	CG	CG	CG	CC	CG	CG	CG	CG	CG	CG	CG	CG	CG	CG	CG	CG	CG	CG	CG	CG	CG	CG	CG	CG	CG	CG	CG
545713	C/A	Unknown	44748391	+	CA	CA	CA	CA	CA	CA	CA	CA	CA	CA	CA	CA	CA	CA	CA	CA	CA	CA	CA	CA	CA	CA	CA	CA	CA	CA	CC	CA	CA	CA	CA	CA	CA	CA	CA	CA	CA	CA	CA	CA	CA	CA	CA	CA	CA
545734	C/T	Unknown	44750115	+	CC	CC	CC	CC	CC	CC	CC	CC	CC	CC	CT	CC	CC	CC	CC	CC	CC	CC	CC	CC	CC	CC	CT	CC	CC	CC	CC	CC	CT	CT	CC	CC	CC	CC	CC	CC	CC	CC	CC	CC	CC	CC	CC	CC	CC
545796	C/G	Unknown	44755201	+	CC	CC	CC	CC	CC	CC	CC	CC	CC	CC	CC	CC	CC	CC	CC	CG	CC	CC	CC	CC	CC	CC	CC	CC	CC	CC	CC	CC	CC	CC	CC	CC	CC	CC	CC	CC	CC	CC	CC	CC	CC	CC	CG	CC	CC
545947	C/T	Unknown	44767600	+	CT	CT	CC	CT	CC	CT	CT	CT	CT	CT	CT	CT	CT	CT	CT	CT	CT	CC	CT	CT	CT	CT	CC	CT	CT	CT	CT	CT	CT	CT	CT	CC	CT	CC	CT	CT	CT	CT	CT	CT	CT	CT	CT	CT	CT
545947	G/T	Unknown	44767609	+	GG	GG	GT	GT	GT	GG	GG	GG	GG	GG	GG	GG	GG	GG	GG	GG	GG	GG	GG	GG	GG	GG	GG	GG	GG	GG	GG	GT	GG	GG	GG	GG	GG	GT	GG	GG	GG	GG	GG	GG	GG	GG	GG	GT	GG
546156	G/A	Unknown	44784721	+	GA	GG	GG	GG	GG	GG	GG	GG	GA	GG	GG	GA	GG	GG	GG	GG	GG	GG	GG	GG	GG	GA	GA	GG	GG	GG	GG	GG	GG	GG	GG	GG	GG	GG	GG	GG	GG	GG	GG	GG	GG	GG	GG	GG	GG
546775	G/A	Unknown	44835501	+	GG	GG	GA	GA	GG	GG	GA	GG	GA	GA	GG	GA	GA	GA	GA	GA	GA	GG	GA	GA	GA	GG	GA	GA	GA	GA	GG	GA	GA	GA	GA	GG	GA	GG	GA	GA	GG	GG	GG	GA	GA	GG	GG	GA	GA
547906	T/C	Unknown	44928235	+	TC	TC	TC	TC	TC	TC	TC	TC	TC	TC	TC	TC	TC	TC	TC	TC	TC	TC	TC	TC	TC	TC	TC	TC	TC	TC	TC	TC	TC	TC	TC	TC	TC	TC	TC	TC	TC	TC	TC	TC	TC	TC	TC	TC	TC
548088	T/G	Unknown	44943170	+	TT	TT	TT	TT	TT	TT	TT	TT	TG	TT	TT	TT	TT	TT	TT	TT	TT	TT	TT	TT	TT	TT	TG	TT	TT	TT	TT	TT	TT	TT	TG	TT	TT	TT	TT	TT	TG	TT	TT	TT	TT	TT	TT	TT	TT
548142	G/C	Unknown	44947591	+	GG	GG	GG	GG	GG	GG	GG	GG	GG	GG	GG	GG	GG	GG	GG	GG	GG	GG	GG	GG	GG	GG	GG	GG	GG	GG	GG	GG	GG	GG	GG	GG	GG	GG	GG	GG	GG	GG	GG	GC	GG	GG	GG	GG	GG
548962	C/T	Unknown	45014818	+	CC	CC	CC	CC	CC	CT	CC	CC	CT	CC	CC	CC	CC	CC	CT	CC	CC	CT	CC	CC	CC	CC	CC	CC	CC	CC	CC	CC	CC	CC	CT	CC	CC	CC	CC	CC	CC	CC	CT	CC	CT	CC	CC	CC	CC
549186	C/T	Unknown	45033198	+	CC	CC	CC	CC	CC	CC	CC	CT	CT	CC	CT	CC	CC	CT	CC	CC	CC	CT	CC	CC	CC	CT	CC	CC	CC	CC	CC	CC	CC	CC	CT	CC	CT	CC	CC	CC	CC	CC	CC	CC	CC	CC	CC	CC	CC
549424	G/C	Unknown	45052757	+	GG	GG	GG	GG	GG	GC	GG	GG	GG	GG	GG	GG	GG	GG	GG	GG	GC	GG	GG	GG	GG	GG	GG	GG	GG	GC	GG	GG	GG	GG	GG	GG	GG	GG	GG	GG	GG	GG	GG	GG	GC	GG	GG	GG	GG
550271	G/A	Unknown	45122161	+	GG	GG	GG	GG	GG	GG	GG	GG	GG	GG	GG	GG	GG	GG	GG	GG	GG	GG	GG	GG	GG	GG	GG	GG	GG	GG	GG	GG	GG	GG	GG	GG	GG	GG	GG	GG	GG	GG	GG	GG	GG	GG	GG	GG	GG
550569	G/T	Unknown	45146597	+	TG	TG	TG	TG	TT	TG	TG	TG	TG	TG	TG	TG	TG	TG	TG	TG	TG	TG	TG	TG	TG	TG	TG	GG	TG	TG	TG	TG	TG	TG	TG	TG	TG	TG	TG	TG	TG	TG	TG	TG	TG	TG	TG	TG	TG
550595	A/T	Unknown	45148723	+	AA	AA	AA	AA	AA	AA	AT	AA	AT	AA	AA	AA	AA	AA	AA	AA	AT	AA	AA	AA	AA	AA	AA	AA	AA	AA	AA	AA	AA	AA	AA	AA	AA	AA	AA	AA	AA	AA	AT	AA	AA	AA	AA	AA	AA
551096	T/G	Unknown	45189831	+	TG	TG	TG	TG	TG	TG	TG	TG	TG	TG	TG	TG	TG	TG	TG	TG	TG	TG	TG	TG	TG	TG	TG	TG	TG	TG	TG	TG	TG	TG	TG	TG	TG	TG	TG	TG	TG	TG	TG	TG	TG	TG	TG	TT	TG
551096	T/G	Unknown	45189832	+	TG	TG	TG	TG	TG	TG	TG	TG	TG	TG	TG	TG	TG	TG	TG	TG	TG	TG	TG	TG	TG	TG	TG	TG	TG	TG	TG	TG	TG	TG	TG	TG	TG	TG	TG	TG	TG	TG	TG	TG	TG	TG	TG	TT	TG
551487	C/T	Unknown	45221887	+	CC	CC	CC	CC	CT	CT	CC	CC	CT	CC	CC	CC	CC	CC	CC	CC	CC	CC	CC	CC	CC	CC	CC	CC	CC	CC	CC	CC	CC	CC	CC	CC	CC	CC	CC	CC	CC	CC	CT	CC	CC	CC	CC	CC	CC
551555	G/C	Unknown	45227461	+	GG	GG	GG	GG	GG	GG	GG	GG	GG	GG	GG	GG	GG	GG	GG	GC	GG	GG	GG	GG	GG	GG	GG	GG	GG	GG	GG	GG	GG	GG	GG	GG	GG	GG	GG	GG	GG	GG	GG	GG	GG	GG	GG	GG	GG
551752	C/T	Unknown	45243617	+	CC	CC	CC	CC	CC	CC	CC	CC	CC	CC	CC	CC	CC	CC	CC	CC	CC	CC	CC	CC	CC	CC	CC	CC	CC	CC	CC	CC	CC	CC	CC	CC	CT	CC	CC	CC	CC	CC	CC	CC	CC	CT	CC	CC	CC
551998	T/C	Unknown	45263762	+	TT	TC	TT	TT	TT	TT	TT	TT	TT	TT	TT	TT	TC	TT	TT	TT	TT	TT	TT	TT	TT	TT	TT	TT	TT	TT	TT	TT	TT	TT	TT	TT	TT	TT	TT	TT	TT	TT	TT	TT	TT	TT	TT	TT	TT
552071	G/A	Unknown	45269769	+	GA	GA	GA	GA	GA	GA	GA	GA	GA	GA	GA	GA	GA	GA	GA	GA	GA	GA	GA	GA	GA	GA	GA	GA	GA	GA	GA	GA	GA	GA	GG	GA	GA	GG	GA	GA	GA	GA	GA	GA	GA	GA	GA	GA	GA
552101	T/C	Unknown	45272216	+	TC	TC	TC	TC	TC	TC	TC	TC	TC	TC	TC	TC	TC	TT	TC	TC	TC	TC	TC	TC	TC	TC	TC	TC	TC	TC	TC	TC	TC	TC	TC	TC	TC	TC	TC	TT	TC	TC	TC	TC	TC	TC	TT	TC	TC
552101	C/G	Unknown	45272234	+	CC	CC	CC	CC	CC	CC	CC	CC	CC	CC	CC	CC	CC	CC	CC	CC	CG	CC	CC	CC	CC	CG	CC	CC	CC	CC	CC	CC	CC	CC	CC	CG	CC	CC	CC	CC	CC	CC	CC	CC	CC	CC	CG	CC	CC
552278	A/T	Unknown	45286761	+	AT	AA	AA	AA	AA	AT	AA	AA	AA	AA	AA	AT	AA	AA	AA	AA	AA	AA	AA	AA	AA	AA	AT	AA	AA	AA	AA	AA	AA	AA	AA	AA	AA	AA	AA	AA	AA	AA	AA	AA	AA	AT	AA	AA	AA
552278	C/T	Unknown	45286781	+	CC	CC	CC	CC	CC	CC	CC	CC	CC	CC	CC	CC	CC	CC	CC	CC	CT	CC	CC	CC	CC	CC	CC	CC	CC	CC	CC	CC	CT	CC	CC	CC	CC	CC	CC	CC	CC	CT	CC	CC	CC	CC	CC	CC	CC
552451	G/A	Unknown	45300911	+	GA	GA	GA	GA	GA	GA	GA	GA	GA	GA	GA	GA	GA	GA	GA	GA	GA	GA	GA	GA	GA	GA	GA	GA	GA	GA	GA	GA	GA	GA	GA	GA	GA	GA	GA	GA	GA	GA	GA	GA	GA	GA	GA	GA	GA
552984	C/T	Unknown	45344624	+	CC	CC	CC	CC	CC	CC	CC	CC	CT	CC	CC	CC	CC	CC	CC	CC	CC	CC	CC	CC	CC	CC	CC	CC	CC	CC	CC	CT	CC	CT	CC	CC	CC	CC	CC	CC	CC	CC	CC	CC	CT	CC	CC	CC	CC
553282	T/C	Unknown	45369088	+	TT	TT	TT	TC	TT	TT	TT	TT	TT	TT	TT	TT	TC	TT	TT	TT	TT	TT	TT	TT	TT	TT	TT	TT	TT	TT	TT	TT	TT	TC	TT	TC	TT	TT	TT	TT	TT	TT	TT	TT	TT	TT	TC	TT	TT
553421	T/C	Unknown	45380461	+	TT	TC	TC	TC	TT	TC	TT	TT	TC	TT	TC	TC	TT	TC	TC	TC	TC	TC	TC	TC	TC	TC	TC	TT	TT	TC	TT	TT	TT	TT	TC	TC	TT	TT	TC	TC	TC	TT	TC	TC	TT	TT	TT	TC	TT
553421	G/A	Unknown	45380474	+	GG	GA	GG	GA	GG	GG	GG	GG	GA	GG	GG	GG	GG	GG	GG	GG	GG	GG	GG	GG	GG	GG	GG	GG	GG	GG	GG	GA	GG	GA	GG	GG	GG	GG	GA	GG	GG	GG	GG	GG	GG	GG	GG	GG	GG
553504	C/T	Unknown	45387265	+	CT	CT	CT	CT	CT	CT	CT	CT	CT	CT	CT	CT	CT	CT	CT	CT	CT	CT	CT	CT	CT	CT	CT	CT	CT	CT	CT	CT	CT	CT	CT	CC	CT	CT	CT	CT	CT	CT	CT	CT	CT	CT	CT	CT	CT
553512	C/T	Unknown	45387940	+	CC	CC	CC	CC	CC	CT	CC	CC	CC	CC	CT	CC	CC	CC	CC	CC	CC	CC	CC	CC	CC	CC	CT	CC	CC	CC	CC	CC	CC	CC	CC	CC	CC	CC	CC	CC	CC	CC	CC	CC	CC	CC	CC	CC	CC
553858	C/T	Unknown	45416282	+	CC	CC	CC	CC	CC	CC	CC	CC	CT	CC	CC	CC	CC	CC	CC	CC	CC	CC	CC	CC	CC	CC	CC	CC	CC	CC	CT	CC	CC	CC	CC	CC	CC	CC	CC	CC	CT	CC	CC	CC	CC	CC	CC	CC	CC
554107	C/A	Unknown	45436742	+	CA	CC	CA	CA	CA	CA	CA	CA	CA	CA	CA	CA	CA	CA	CA	CA	CC	CA	CA	CA	CA	CA	CA	CA	CA	CA	CA	CA	CA	CA	CA	CA	CA	CA	CA	CA	CA	CA	CA	CA	CA	CA	CA	CA	CA
554124	G/C	Unknown	45438122	+	GG	GG	GG	GG	GG	GG	GC	GG	GG	GG	GG	GG	GG	GG	GG	GG	GG	GG	GG	GG	GG	GG	GG	GG	GG	GG	GC	GG	GG	GG	GC	GG	GG	GG	GG	GG	GG	GG	GC	GC	GG	GG	GG	GG	GG
554868	G/C	Unknown	45499100	+	GG	GG	GG	GG	GG	GG	GG	GG	GG	GG	GG	GG	GG	GG	GG	GG	GC	GG	GG	GG	GG	GG	GG	GG	GG	GG	GG	GC	GG	GG	GG	GG	GG	GG	GG	GG	GG	GG	GG	GG	GG	GG	GG	GG	GG
554868	G/A	Unknown	45499130	+	GG	GG	GG	GG	GG	GG	GG	GG	GG	GG	GG	GA	GG	GG	GG	GG	GG	GG	GG	GG	GG	GG	GA	GG	GA	GG	GG	GG	GG	GA	GG	GG	GG	GG	GG	GG	GG	GA	GG	GG	GG	GA	GA	GG	GA
555001	G/A	Unknown	45510037	+	GG	GG	GG	GG	GG	GG	GG	GA	GG	GG	GG	GG	GG	GG	GG	GG	GG	GG	GG	GG	GG	GG	GG	GG	GG	GG	GG	GG	GG	GG	GG	GG	GG	GG	GG	GG	GG	GA	GG	GG	GG	GG	GG	GG	GG
555145	C/A	Unknown	45521831	+	CC	CC	CC	CC	CC	CC	CC	CC	CC	CC	CC	CC	CA	CC	CA	CC	CC	CC	CC	CA	CC	CA	CC	CA	CC	CC	CC	CA	CA	CC	CA	CA	CC	CC	CC	CC	CC	CC	CC	CC	CC	CC	CC	CC	CC
555175	G/A	Unknown	45524291	+	GG	GG	GG	GG	GG	GG	GG	GG	GG	GG	GG	GG	GG	GG	GG	GG	GG	GG	GG	GG	GA	GG	GA	GG	GG	GG	GA	GG	GA	GG	GG	GA	GG	GG	GG	GG	GG	GG	GG	GG	GG	GG	GG	GG	GG
555294	C/G	Unknown	45534076	+	CG	CG	CG	CG	CG	CG	CC	CG	CG	CG	CG	CG	CG	CG	CG	CG	CG	CG	CG	CG	CG	CG	CC	CG	CG	CG	CC	CG	CG	CG	CG	CG	CG	CG	CG	CG	CG	CG	CG	CG	CG	CG	CG	CG	CG
555433	C/A	Unknown	45545449	+	CC	CA	CC	CC	CA	CC	CC	CC	CC	CC	CC	CC	CC	CC	CC	CC	CC	CC	CC	CC	CC	CC	CA	CC	CC	CC	CC	CC	CC	CC	CA	CC	CC	CC	CC	CC	CC	CC	CC	CC	CC	CC	CC	CC	CC
555549	G/A	Unknown	45554967	+	GA	GA	GA	GA	GA	GA	GA	GA	GA	GA	GA	GA	GG	GA	GA	GA	GA	GA	GA	GA	GA	GA	GA	GA	GA	GA	GA	GA	GA	GA	GA	GA	GA	GA	GA	GA	GA	GA	GG	GA	GA	GA	GG	GA	GA
555635	C/T	Unknown	45562007	+	CC	CT	CC	CC	CT	CC	CC	CC	CC	CC	CC	CC	CC	CC	CT	CT	CC	CC	CC	CC	CC	CC	CC	CC	CC	CC	CT	CC	CC	CC	CC	CC	CT	CC	CC	CC	CC	CC	CC	CC	CC	CC	CC	CC	CC
555879	C/T	Unknown	45582057	+	CC	CC	CC	CC	CT	CC	CC	CC	CC	CC	CC	CC	CC	CC	CC	CC	CC	CC	CC	CC	CC	CC	CC	CC	CT	CC	CT	CC	CC	CC	CC	CC	CC	CC	CC	CC	CC	CC	CC	CC	CC	CT	CC	CC	CC
556179	C/G	Unknown	45606679	+	CC	CC	CC	CC	CC	CC	CC	CG	CG	CC	CC	CC	CC	CC	CC	CC	CC	CC	CC	CC	CC	CC	CC	CC	CC	CC	CC	CC	CC	CC	CC	CC	CC	CC	CC	CC	CC	CC	CC	CC	CC	CC	CC	CC	CC
556468	A/G	Unknown	45630347	+	AA	AA	AA	AA	AA	AA	AG	AA	AA	AA	AA	AA	AA	AA	AA	AA	AA	AA	AA	AA	AA	AA	AA	AA	AA	AA	AA	AG	AA	AA	AA	AA	AA	AA	AA	AA	AA	AA	AA	AA	AA	AA	AA	AA	AA
556541	A/G	Unknown	45636304	+	AG	AG	AG	AG	AG	AG	AA	AA	AA	AG	AG	AG	AA	AG	AA	AG	AA	AA	AG	AA	AA	AA	AA	AG	AA	AG	AA	AG	AG	AA	AG	AG	AA	AA	AA	AG	AG	AG	AG	AG	AA	AG	AG	AG	AA
556541	A/C	Unknown	45636319	+	AC	AC	AC	AC	AC	AC	AC	AC	AC	AA	AC	AC	AC	AC	AA	AA	AC	AC	AC	AC	AC	AC	AA	AC	AC	AA	AC	AC	AC	AC	AC	AC	AC	AC	AA	AC	AA	AC	AC	AC	AC	AA	AA	AC	AC
559883	T/G	Unknown	45910333	+	TT	TT	TT	TT	TT	TT	TG	TT	TG	TT	TG	TT	TT	TT	TT	TT	TT	TT	TT	TT	TT	TT	TG	TT	TT	TT	TT	TT	TT	TT	TT	TG	TT	TT	TT	TT	TT	TT	TT	TT	TT	TG	TG	TT	TT
559936	T/C	Unknown	45914682	+	TC	TT	TT	TT	TT	TT	TT	TT	TT	TT	TT	TT	TT	TT	TC	TT	TT	TT	TT	TT	TT	TT	TT	TT	TT	TT	TT	TT	TT	TT	TT	TT	TT	TT	TT	TT	TT	TT	TT	TT	TC	TT	TT	TT	TT
559936	C/T	Unknown	45914696	+	CT	CC	CC	CC	CC	CC	CC	CC	CC	CC	CC	CC	CC	CC	CC	CC	CC	CC	CC	CC	CC	CC	CT	CC	CC	CC	CC	CC	CC	CC	CC	CC	CC	CC	CT	CC	CC	CC	CC	CC	CC	CC	CC	CC	CC
560065	G/C	Unknown	45925298	+	GC	GG	GG	GG	GG	GG	GG	GG	GC	GG	GG	GG	GG	GG	GG	GG	GG	GG	GG	GG	GG	GG	GG	GG	GG	GG	GC	GG	GG	GG	GG	GC	GG	GG	GG	GG	GG	GG	GG	GG	GG	GG	GG	GG	GG
560366	G/C	Unknown	45949947	+	GC	GG	GG	GG	GG	GG	GG	GG	GG	GG	GG	GG	GC	GG	GG	GG	GG	GG	GG	GG	GC	GG	GG	GG	GG	GG	GG	GG	GG	GG	GG	GG	GG	GG	GG	GC	GC	GC	GC	GG	GG	GG	GG	GG	GG
560417	A/C	Unknown	45954141	+	AC	AC	AC	AC	AC	AC	AC	AC	AC	AC	AC	AC	AC	AC	AC	AC	AC	AC	AC	AC	AC	AC	AC	AC	AC	AC	AC	AC	AC	AC	AC	AC	AC	AC	AC	AC	AC	AC	AC	AC	AC	AA	AC	AC	AC
560636	C/T	Unknown	45972101	+	CC	CC	CC	CC	CC	CC	CC	CC	CC	CC	CC	CC	CC	CC	CC	CC	CC	CC	CC	CC	CC	CC	CC	CC	CC	CC	CC	CC	CC	CT	CC	CC	CC	CC	CC	CC	CC	CC	CC	CC	CC	CC	CC	CC	CC
561084	A/G	Unknown	46008837	+	AG	AG	AG	AG	AG	AG	AG	AG	AG	AG	AG	AG	AG	AG	AG	AG	AG	AG	AG	AG	AG	AG	AG	AG	AA	AG	AG	AG	AG	AG	AG	AG	AG	AG	AG	AG	AG	AG	AG	AG	AG	AG	AG	AG	AG
561736	C/G	Unknown	46062295	+	CC	CC	CC	CC	CG	CC	CC	CC	CC	CC	CC	CC	CC	CC	CC	CC	CC	CC	CC	CC	CC	CC	CC	CC	CC	CC	CC	CC	CC	CC	CC	CC	CC	CC	CC	CC	CC	CC	CG	CC	CC	CC	CC	CC	CC
562010	C/T	Unknown	46084764	+	CC	CC	CC	CC	CC	CC	CC	CC	CC	CC	CC	CC	CT	CC	CC	CC	CC	CC	CC	CC	CC	CC	CC	CC	CC	CC	CC	CC	CC	CC	CT	CC	CC	CC	CC	CC	CC	CC	CC	CC	CC	CC	CC	CC	CC
562040	G/A	Unknown	46087215	+	GG	GG	GG	GG	GG	GG	GG	GG	GG	GG	GG	GG	GG	GG	GG	GG	GG	GG	GG	GG	GG	GG	GG	GG	GG	GG	GG	GG	GG	GG	GG	GG	GG	GG	GG	GG	GG	GG	GG	GG	GG	GG	GA	GG	GA
562040	G/T	Unknown	46087221	+	GG	GT	GG	GG	GG	GT	GG	GG	GT	GG	GG	GG	GG	GG	GG	GG	GG	GG	GG	GG	GG	GG	GG	GG	GT	GG	GG	GG	GG	GG	GG	GG	GG	GG	GG	GG	GG	GG	GG	GG	GG	GG	GG	GG	GG
562760	G/A	Unknown	46146253	+	GG	GG	GA	GG	GA	GG	GA	GA	GG	GG	GG	GA	GA	GG	GG	GA	GA	GA	GA	GG	GA	GA	GA	GG	GG	GG	GA	GG	GA	GG	GG	GA	GG	GG	GA	GA	GA	GG	GG	GA	GG	GG	GG	GA	GA
562760	C/A	Unknown	46146264	+	CC	CA	CA	CA	CA	CA	CA	CC	CA	CA	CC	CA	CA	CA	CA	CA	CA	CC	CA	CA	CA	CA	CA	CA	CA	CA	CA	CA	CA	CA	CA	CA	CA	CA	CA	CA	CA	CA	CA	CA	CA	CA	CC	CA	CA
564359	C/G	Unknown	46277439	+	CC	CC	CC	CC	CC	CC	CC	CG	CG	CC	CC	CC	CC	CC	CC	CC	CC	CC	CC	CC	CC	CC	CC	CC	CC	CC	CC	CC	CC	CC	CC	CC	CC	CC	CC	CC	CC	CC	CC	CC	CC	CC	CC	CC	CC
564776	C/T	Unknown	46311568	+	CC	CC	CC	CC	CC	CC	CC	CC	CC	CC	CC	CC	CC	CC	CC	CC	CC	CC	CC	CC	CC	CC	CC	CC	CC	CC	CC	CC	CC	CC	CC	CC	CC	CC	CC	CC	CC	CC	CC	CC	CC	CC	CC	CC	CC
564811	G/C	Unknown	46314462	+	GG	GG	GG	GG	GG	GG	GG	GG	GG	GG	GG	GC	GG	GG	GG	GG	GG	GG	GG	GG	GG	GG	GG	GG	GG	GG	GG	GG	GG	GG	GG	GG	GG	GG	GG	GG	GG	GG	GG	GG	GG	GG	GG	GG	GG
564936	A/G	Unknown	46324696	+	AA	AA	AA	AA	AA	AG	AA	AA	AA	AA	AA	AA	AA	AA	AA	AA	AA	AA	AA	AA	AG	AA	AA	AA	AA	AG	AA	AG	AA	AA	AA	AG	AA	AA	AA	AA	AA	AA	AA	AA	AA	AG	AG	AA	AA
566887	C/G	Unknown	46484662	+	CC	CC	CC	CG	CC	CC	CC	CC	CC	CC	CC	CC	CC	CC	CC	CC	CC	CC	CC	CC	CC	CC	CC	CG	CC	CG	CC	CC	CC	CC	CC	CC	CC	CC	CC	CC	CC	CC	CG	CC	CC	CC	CC	CC	CC
566974	A/C	Unknown	46491868	+	AA	AA	AA	AA	AA	AA	AA	AA	AC	AA	AA	AA	AA	AA	AA	AA	AA	AA	AA	AA	AA	AA	AA	AA	AA	AA	AA	AA	AA	AA	AA	AA	AA	AA	AA	AA	AC	AA	AA	AA	AA	AA	AA	AA	AA
566974	T/G	Unknown	46491869	+	TT	TT	TT	TT	TT	TT	TT	TT	TT	TT	TT	TT	TT	TT	TT	TT	TT	TT	TT	TT	TT	TT	TT	TT	TT	TT	TT	TT	TT	TT	TG	TT	TT	TT	TT	TT	TT	TT	TT	TT	TT	TT	TT	TT	TT
567102	A/G	Unknown	46502315	+	AG	AA	AA	AA	AA	AA	AA	AA	AA	AA	AA	AA	AG	AA	AA	AA	AA	AG	AA	AA	AA	AA	AA	AA	AA	AA	AG	AA	AA	AA	AA	AG	AA	AG	AA	AA	AG	AA	AA	AA	AA	AA	AA	AA	AA
568008	T/A	Unknown	46576591	+	TT	TT	TT	TT	TA	TA	TT	TT	TT	TT	TT	TT	TT	TT	TT	TT	TT	TT	TT	TT	TT	TT	TT	TT	TT	TT	TT	TT	TT	TT	TT	TT	TT	TT	TT	TA	TT	TT	TT	TT	TT	TT	TT	TT	TT
568078	T/C	Unknown	46582333	+	TT	TT	TT	TT	TT	TT	TT	TT	TC	TT	TT	TT	TT	TT	TT	TT	TT	TC	TT	TT	TT	TT	TT	TT	TT	TT	TT	TC	TT	TT	TT	TT	TT	TT	TT	TT	TT	TC	TT	TT	TT	TT	TT	TT	TT
568292	G/A	Unknown	46599887	+	GG	GG	GG	GG	GG	GG	GG	GG	GG	GG	GG	GG	GA	GG	GG	GG	GG	GG	GG	GG	GG	GG	GG	GG	GG	GG	GG	GG	GG	GG	GA	GG	GG	GG	GG	GG	GG	GG	GG	GG	GG	GA	GG	GG	GG
568449	A/T	Unknown	46612778	+	AA	AA	AA	AA	AA	AT	AA	AA	AA	AA	AA	AT	AA	AA	AA	AA	AA	AA	AA	AT	AA	AA	AA	AA	AA	AA	AA	AA	AA	AT	AA	AA	AA	AA	AA	AA	AT	AA	AA	AA	AA	AT	AT	AA	AA
568599	G/C	Unknown	46625063	+	GG	GG	GG	GG	GG	GG	GG	GG	GG	GG	GG	GG	GG	GG	GG	GG	GG	GG	GG	GG	GG	GG	GG	GG	GG	GG	GG	GG	GG	GG	GG	GG	GG	GG	GG	GG	GG	GG	GG	GG	GG	GC	GG	GG	GC
568615	C/A	Unknown	46626401	+	CC	CC	CC	CC	CC	CC	CC	CC	CC	CC	CC	CC	CA	CC	CC	CC	CC	CC	CC	CC	CC	CC	CA	CC	CC	CC	CC	CC	CC	CC	CC	CC	CC	CC	CC	CC	CC	CA	CC	CC	CC	CC	CC	CC	CC
568851	C/T	Unknown	46645725	+	CT	CC	CC	CC	CC	CC	CC	CC	CC	CC	CC	CC	CC	CC	CC	CC	CC	CC	CC	CC	CC	CC	CT	CC	CC	CC	CC	CC	CT	CT	CT	CC	CC	CC	CC	CC	CC	CC	CC	CC	CC	CC	CC	CC	CC
568851	G/A	Unknown	46645742	+	GA	GG	GG	GG	GG	GG	GG	GG	GG	GG	GG	GG	GG	GG	GG	GG	GG	GG	GG	GG	GG	GG	GA	GG	GG	GG	GG	GG	GA	GA	GA	GG	GG	GG	GG	GG	GG	GG	GG	GG	GG	GG	GG	GG	GG
569464	C/A	Unknown	46695980	+	CC	CC	CC	CA	CC	CA	CC	CC	CC	CC	CC	CA	CC	CC	CC	CC	CC	CC	CC	CC	CA	CC	CC	CA	CC	CC	CC	CC	CC	CC	CC	CC	CC	CC	CC	CC	CC	CC	CC	CC	CC	CC	CC	CC	CC
569464	C/T	Unknown	46695991	+	CC	CC	CC	CC	CC	CC	CC	CC	CT	CC	CC	CC	CC	CC	CT	CC	CC	CC	CC	CC	CC	CC	CC	CC	CC	CC	CC	CC	CC	CC	CC	CC	CC	CC	CC	CC	CC	CC	CC	CC	CT	CC	CC	CC	CC
569464	C/T	Unknown	46696002	+	CC	CC	CC	CC	CC	CC	CC	CC	CT	CC	CC	CC	CC	CC	CT	CC	CC	CC	CC	CC	CC	CC	CC	CC	CC	CC	CC	CC	CC	CC	CC	CC	CC	CC	CC	CC	CC	CC	CC	CC	CT	CC	CC	CC	CC
569583	C/A	Unknown	46705750	+	CC	CC	CC	CC	CC	CC	CC	CC	CC	CC	CA	CA	CC	CC	CC	CC	CC	CC	CC	CC	CC	CC	CC	CC	CC	CC	CC	CC	CC	CC	CC	CC	CC	CC	CC	CC	CC	CC	CC	CC	CC	CC	CC	CC	CC
569978	T/C	Unknown	46738130	+	TC	TC	TC	TC	TC	TC	TC	TC	TC	TC	TC	TC	TC	TC	TC	TC	TC	TC	TC	TC	TC	TC	TC	TC	TC	TC	TC	TC	TT	TC	TC	TC	TC	TC	TC	TC	TC	TC	TC	TC	TC	TC	TC	TC	TC
570808	C/T	Unknown	46806182	+	CC	CC	CC	CC	CC	CC	CC	CC	CC	CC	CT	CC	CC	CC	CC	CC	CC	CC	CC	CC	CC	CC	CC	CC	CT	CC	CC	CC	CC	CC	CC	CC	CC	CT	CC	CC	CC	CC	CC	CC	CC	CC	CC	CC	CC
571869	T/A	Unknown	46893179	+	TT	TA	TT	TT	TT	TA	TT	TT	TT	TT	TT	TT	TT	TT	TT	TT	TT	TT	TT	TT	TT	TT	TT	TT	TA	TT	TT	TT	TT	TA	TT	TT	TT	TT	TT	TT	TT	TA	TT	TT	TT	TT	TA	TT	TA
571869	A/G	Unknown	46893236	+	AA	AA	AA	AA	AA	AA	AA	AA	AA	AA	AA	AG	AA	AA	AA	AA	AA	AA	AA	AA	AA	AA	AA	AA	AA	AA	AG	AA	AA	AA	AA	AA	AA	AA	AA	AA	AA	AA	AA	AG	AA	AA	AA	AA	AG
572289	C/G	Unknown	46927642	+	CC	CC	CC	CG	CC	CC	CC	CC	CC	CC	CC	CC	CC	CC	CG	CC	CG	CG	CC	CC	CC	CG	CG	CC	CG	CG	CC	CG	CG	CG	CC	CC	CG	CC	CG	CC	CC	CG	CC	CG	CC	CG	CC	CC	CC
573166	C/A	Unknown	46999567	+	CC	CA	CC	CC	CC	CC	CC	CC	CA	CC	CC	CC	CA	CC	CC	CC	CC	CA	CC	CC	CC	CC	CC	CC	CC	CC	CC	CA	CC	CC	CC	CC	CC	CC	CC	CC	CC	CC	CA	CC	CC	CC	CC	CC	CC
574333	C/A	Unknown	47095251	+	CC	CC	CC	CC	CC	CC	CC	CC	CC	CC	CC	CC	CC	CC	CC	CC	CC	CC	CC	CC	CC	CC	CC	CC	CC	CC	CC	CA	CC	CC	CC	CC	CC	CC	CC	CC	CC	CC	CC	CC	CC	CC	CC	CC	CC
574465	G/A	Unknown	47106084	+	GG	GA	GA	GG	GA	GA	GG	GA	GG	GA	GG	GA	GA	GA	GG	GA	GA	GG	GA	GA	GG	GG	GG	GG	GG	GG	GA	GA	GA	GA	GA	GA	GG	GA	GA	GA	GA	GA	GA	GG	GG	GA	GA	GA	GA
574645	G/T	Unknown	47120837	+	GG	GG	GG	GG	GG	GG	GG	GG	GG	GG	GT	GG	GG	GG	GG	GG	GG	GG	GG	GG	GG	GG	GT	GT	GG	GG	GG	GG	GG	GG	GG	GG	GT	GG	GG	GG	GG	GG	GG	GG	GG	GG	GG	GG	GG
574980	C/G	Unknown	47148303	+	CC	CC	CC	CC	CC	CG	CC	CC	CC	CC	CC	CC	CC	CC	CC	CC	CC	CC	CC	CC	CC	CC	CC	CC	CC	CC	CG	CC	CC	CC	CC	CC	CC	CC	CC	CC	CC	CG	CC	CC	CC	CC	CC	CC	CC
575567	A/G	Unknown	47196419	+	AG	AG	AG	AG	AG	AG	AG	AG	AG	AG	AG	AG	AG	AG	AG	AG	AG	AG	AG	AG	AG	AG	AG	AG	AG	AG	AG	AG	AG	AG	AG	AG	AG	AG	AG	AG	AG	AG	AG	AG	AG	AG	AG	AG	AG
575583	C/T	Unknown	47197749	+	CC	CT	CT	CT	CT	CC	CT	CT	CT	CT	CT	CT	CT	CT	CT	CT	CC	CT	CT	CT	CT	CT	CT	CT	CT	CT	CT	CT	CT	CT	CT	CT	CT	CT	CT	CT	CT	CT	CT	CT	CT	CT	CT	CT	CT
575615	G/C	Unknown	47200391	+	GG	GG	GG	GG	GG	GG	GG	GG	GG	GG	GG	GG	GG	GC	GG	GG	GG	GG	GG	GG	GG	GG	GG	GG	GG	GG	GG	GG	GG	GC	GG	GG	GG	GC	GC	GG	GG	GG	GC	GG	GG	GG	GG	GG	GG
576188	A/C	Unknown	47247417	+	CA	CA	CA	CA	CA	CA	CA	CA	CA	CA	CA	CA	CA	CA	CA	CA	CA	CA	CA	CA	CA	CA	CA	CA	CA	CA	CA	CA	CA	CA	CA	CA	CA	CA	CA	CA	CA	CA	CA	CA	CA	CA	CA	CA	CA
576484	G/A	Unknown	47271628	+	GG	GG	GG	GG	GG	GA	GG	GG	GG	GG	GG	GG	GG	GG	GG	GG	GG	GG	GG	GG	GG	GG	GG	GG	GG	GA	GG	GG	GG	GG	GG	GG	GG	GG	GG	GG	GG	GG	GG	GG	GG	GG	GA	GG	GG
577180	C/T	Unknown	47328691	+	CC	CC	CC	CC	CC	CC	CC	CC	CC	CC	CC	CC	CC	CC	CC	CC	CC	CC	CC	CC	CT	CC	CC	CC	CC	CC	CC	CC	CC	CC	CC	CC	CC	CC	CC	CC	CC	CC	CT	CC	CC	CC	CC	CC	CC
577830	G/A	Unknown	47382012	+	GG	GG	GG	GG	GG	GG	GG	GG	GG	GG	GG	GG	GA	GG	GA	GG	GG	GG	GG	GG	GG	GG	GG	GG	GG	GG	GG	GG	GG	GG	GG	GG	GG	GG	GG	GG	GG	GG	GG	GG	GG	GG	GG	GG	GG
577930	C/T	Unknown	47390216	+	CC	CC	CC	CC	CT	CC	CC	CC	CC	CC	CC	CC	CC	CC	CC	CC	CC	CC	CC	CC	CC	CC	CT	CC	CC	CT	CT	CC	CC	CT	CC	CC	CC	CC	CC	CC	CC	CC	CT	CC	CC	CT	CC	CC	CC
578102	G/A	Unknown	47404305	+	GG	GG	GG	GG	GG	GA	GG	GG	GG	GG	GG	GG	GG	GG	GG	GG	GG	GG	GG	GG	GG	GG	GA	GG	GG	GA	GG	GG	GG	GG	GG	GG	GG	GG	GG	GG	GG	GG	GG	GG	GG	GG	GG	GG	GG
578699	A/G	Unknown	47453242	+	AG	AA	AA	AA	AA	AA	AA	AA	AA	AA	AA	AA	AA	AG	AA	AA	AA	AA	AA	AA	AA	AA	AA	AA	AA	AA	AA	AG	AA	AA	AG	AA	AA	AA	AA	AA	AA	AG	AA	AA	AA	AA	AA	AA	AA
579824	G/T	Unknown	47545495	+	GT	GT	GT	GT	GG	GT	GT	GT	GT	GT	GT	GT	GT	GT	GT	GT	GT	GT	GT	GT	GT	GT	GT	GT	GT	GT	GT	GT	GT	GT	GT	GT	GT	GT	GT	GT	GG	GT	GT	GT	GT	GT	GT	GT	GT
579910	C/A	Unknown	47552544	+	CA	CC	CC	CC	CC	CC	CC	CC	CC	CC	CA	CC	CC	CC	CC	CC	CC	CC	CC	CC	CC	CC	CC	CC	CA	CA	CC	CC	CC	CC	CC	CC	CC	CC	CC	CC	CA	CC	CC	CC	CC	CC	CC	CC	CC
579910	G/T	Unknown	47552547	+	GT	GG	GG	GG	GG	GG	GG	GG	GG	GG	GT	GG	GG	GG	GG	GG	GG	GG	GG	GG	GG	GG	GG	GG	GT	GT	GG	GG	GG	GG	GG	GG	GG	GG	GG	GG	GT	GG	GG	GG	GG	GG	GG	GG	GG
579913	C/T	Unknown	47552797	+	CC	CC	CC	CC	CC	CC	CT	CC	CC	CC	CT	CC	CC	CC	CC	CC	CC	CC	CT	CC	CC	CC	CC	CC	CC	CC	CT	CC	CC	CC	CC	CC	CC	CC	CC	CC	CC	CC	CC	CC	CC	CC	CC	CC	CC
579981	C/T	Unknown	47558386	+	CT	CT	CC	CC	CT	CT	CC	CC	CC	CC	CC	CC	CC	CC	CC	CC	CC	CC	CC	CC	CC	CC	CC	CC	CC	CC	CC	CC	CT	CC	CC	CC	CC	CC	CC	CC	CC	CC	CT	CC	CT	CT	CC	CC	CC
580393	G/C	Unknown	47592169	+	GC	GC	GC	GC	GC	GC	GC	GC	GC	GC	GC	GC	GC	GC	GC	GC	GC	GC	GC	GC	GC	GC	GC	GC	GC	GC	GC	GC	GC	GC	GC	GC	GC	GC	GC	GC	GC	GC	GC	GC	GC	GC	GC	GC	GC
580524	C/T	Unknown	47602893	+	CT	CT	CT	CT	CT	CT	CT	CT	CT	CT	CT	CT	CT	CT	CT	CT	CT	CT	CT	CT	CT	CT	CT	CT	CT	CT	CT	CT	CT	TT	CT	CT	CT	CT	CT	CT	CT	CT	CT	CT	CT	CT	CT	CT	CT
580524	T/G	Unknown	47602919	+	TT	TT	TT	TT	TT	TG	TT	TT	TT	TT	TT	TT	TT	TT	TG	TT	TT	TT	TT	TT	TT	TT	TT	TT	TT	TT	TT	TT	TT	TT	TT	TT	TT	TT	TT	TT	TT	TT	TT	TT	TT	TT	TG	TT	TT
581612	G/C	Unknown	47692137	+	GG	GG	GG	GC	GG	GG	GG	GG	GG	GG	GG	GG	GG	GG	GG	GG	GG	GG	GG	GG	GG	GG	GG	GG	GG	GG	GG	GG	GG	GG	GG	GG	GG	GG	GG	GG	GG	GG	GG	GC	GG	GG	GG	GG	GC
581612	T/C	Unknown	47692138	+	TT	TC	TT	TT	TT	TT	TT	TT	TC	TT	TC	TT	TT	TT	TT	TT	TT	TT	TT	TT	TT	TT	TT	TC	TT	TC	TT	TT	TT	TT	TT	TT	TT	TT	TT	TT	TT	TT	TT	TC	TT	TC	TT	TT	TT
581612	A/C	Unknown	47692139	+	AA	AC	AA	AA	AA	AA	AA	AA	AC	AA	AC	AA	AA	AA	AA	AA	AA	AA	AA	AA	AA	AA	AA	AC	AA	AC	AA	AA	AA	AA	AA	AA	AA	AA	AA	AA	AA	AA	AA	AC	AA	AC	AA	AA	AA
581965	G/A	Unknown	47721072	+	GG	GG	GG	GG	GG	GG	GA	GG	GG	GG	GG	GG	GG	GG	GA	GA	GG	GG	GG	GG	GG	GG	GG	GG	GG	GG	GA	GG	GG	GA	GG	GG	GG	GG	GG	GG	GG	GG	GG	GA	GG	GG	GA	GG	GG
582140	C/T	Unknown	47735409	+	CT	CC	CC	CC	CC	CC	CC	CC	CC	CC	CC	CC	CC	CC	CC	CC	CC	CC	CC	CC	CC	CC	CC	CC	CC	CC	CC	CC	CC	CC	CC	CT	CC	CC	CC	CC	CC	CC	CC	CC	CC	CC	CC	CC	CC
582140	G/A	Unknown	47735436	+	GA	GA	GA	GA	GA	GA	GG	GG	GA	GA	GA	GA	GA	GA	GA	GA	GA	GA	GA	GA	GA	GA	GG	GA	GA	GA	GA	GA	GA	GA	GA	GA	GA	GG	GA	GA	GA	GA	GA	GA	GA	GA	GA	GA	GA
583175	C/T	Unknown	47820275	+	TC	TC	TC	TC	CC	TC	TC	TC	TC	TC	TC	TC	TC	TC	TC	TC	TC	TC	TC	TC	TC	TC	TC	TC	TC	TC	TC	TC	TC	TC	TC	TC	TC	TC	TC	TC	TC	TC	TC	TC	TC	TT	TC	TC	TC
583175	C/G	Unknown	47820293	+	GC	GC	GC	GC	CC	GC	GC	GC	GC	GC	GC	GC	GC	GC	GC	GC	GC	GC	GC	GC	GC	GC	GC	GC	GC	GC	GC	GC	GC	GC	GC	GC	GC	GC	GC	GC	GC	GC	GC	GC	GC	GG	GC	GC	GC
583653	A/C	Unknown	47859497	+	AA	AA	AA	AA	AA	AC	AA	AA	AA	AA	AA	AA	AC	AC	AA	AA	AA	AA	AA	AA	AA	AC	AA	AA	AA	AC	AA	AC	AA	AA	AA	AA	AA	AA	AA	AA	AA	AA	AA	AA	AA	AA	AA	AA	AA
583662	T/A	Unknown	47860213	+	TT	TT	TT	TT	TT	TA	TT	TT	TT	TT	TT	TT	TT	TT	TT	TT	TT	TT	TT	TT	TT	TT	TT	TT	TT	TT	TT	TT	TT	TT	TT	TT	TT	TT	TT	TT	TT	TT	TT	TT	TA	TT	TT	TT	TT
583863	C/T	Unknown	47876691	+	CC	CT	CC	CC	CC	CC	CC	CC	CC	CT	CT	CC	CC	CC	CT	CC	CC	CC	CC	CC	CC	CC	CT	CC	CC	CC	CC	CC	CC	CC	CC	CC	CC	CC	CC	CC	CC	CC	CC	CC	CC	CC	CC	CC	CC
584385	C/G	Unknown	47919502	+	CG	CG	CG	CG	CG	CG	CG	CG	CG	CG	CG	CG	CC	CG	CG	CG	CG	CG	CG	CG	CG	CG	GG	CG	CG	CG	CG	CG	CG	CG	CG	CG	CG	CG	CG	CG	CG	CG	CG	CG	CG	CG	CG	CG	CG
584385	G/T	Unknown	47919523	+	GT	GG	GG	GG	GT	GT	GT	GT	GG	GG	GT	GG	GT	GG	GG	GG	GT	GG	GG	GG	GT	GG	GG	GT	GT	GG	GT	GG	GT	GT	GT	GT	GT	GG	GG	GG	GG	GT	GT	GT	GT	GT	GG	GG	GT
584409	T/A	Unknown	47921473	+	TT	TT	TT	TT	TT	TT	TT	TT	TT	TT	TT	TT	TA	TT	TT	TT	TT	TT	TT	TT	TT	TT	TT	TT	TT	TT	TT	TT	TA	TT	TA	TT	TT	TT	TT	TT	TT	TA	TT	TA	TT	TT	TT	TT	TT
585343	G/A	Unknown	47998078	+	GG	GG	GG	GG	GG	GG	GG	GG	GG	GG	GG	GG	GG	GG	GG	GG	GG	GG	GG	GG	GG	GG	AA	GA	GG	GG	GG	GA	GG	GA	GG	GG	GG	GG	GG	GG	GG	GA	GG	GG	GG	GA	GA	GG	GA
585343	G/A	Unknown	47998089	+	GG	GG	GG	GG	GG	GG	GA	GG	GG	GG	GG	GG	GG	GG	GG	GG	GG	GG	GG	GG	GG	GA	GG	GG	GG	GG	GA	GG	GG	GA	GA	GG	GG	GG	GA	GG	GG	GG	GA	GG	GA	GG	GG	GG	GG
585837	C/A	Unknown	48038578	+	CC	CC	CC	CC	CC	CC	CC	CA	CC	CC	CC	CC	CC	CC	CC	CC	CC	CC	CC	CC	CC	CC	CC	CC	CC	CC	CA	CC	CC	CA	CC	CC	CC	CC	CC	CC	CC	CA	CC	CC	CC	CC	CC	CC	CC
586195	C/T	Unknown	48067954	+	CC	CC	CC	CC	CC	CC	CC	CC	CC	CT	CC	CC	CT	CT	CC	CC	CC	CC	CC	CC	CC	CC	CC	CC	CC	CC	CC	CC	CC	CC	CC	CC	CC	CC	CC	CC	CC	CC	CC	CC	CC	CC	CC	CC	CC
586293	C/T	Unknown	48075966	+	CC	CC	CC	CC	CC	CC	CC	CC	CC	CC	CC	CC	CC	CC	CC	CC	CC	CC	CC	CC	CC	CC	CC	CC	CC	CC	CC	CC	CT	CC	CC	CT	CC	CC	CC	CC	CC	CC	CC	CC	CC	CC	CC	CC	CT
586362	C/A	Unknown	48081624	+	CC	CC	CC	CC	CC	CC	CC	CA	CC	CC	CC	CC	CA	CC	CC	CC	CC	CC	CC	CC	CC	CC	CC	CC	CC	CC	CC	CC	CC	CC	CC	CC	CC	CC	CC	CC	CC	CC	CA	CC	CC	CC	CC	CC	CC
586362	A/G	Unknown	48081636	+	AG	AA	AA	AA	AA	AA	AG	AA	AA	AA	AA	AA	AA	AA	AG	AA	AA	AA	AA	AA	AG	AA	AA	AG	AG	AA	AG	AA	AG	AA	AA	AA	AA	AG	AG	AA	AA	AG	AA	AA	AA	AG	AA	AA	AA
586660	A/G	Unknown	48106053	+	AA	AA	AA	AA	AA	AA	AA	AA	AA	AG	AA	AG	AA	AA	AA	AA	AA	AA	AA	AA	AA	AA	AA	AA	AA	AA	AA	AG	AA	AA	AG	AA	AA	AA	AA	AA	AA	AA	AA	AA	AA	AA	AA	AA	AA
586742	C/T	Unknown	48112784	+	CT	CT	CT	CT	CT	CT	CC	CT	CT	CT	CT	CT	CT	CT	CT	CT	CT	CT	CT	CT	CT	CT	CT	CT	CT	CT	CT	CT	CT	CT	CC	CT	CC	CT	CT	CT	CT	CT	CT	CT	CT	CT	CT	CT	CT
586804	G/A	Unknown	48117863	+	GG	GG	GG	GG	GA	GG	GG	GA	GG	GG	GG	GG	GG	GG	GG	GG	GG	GG	GG	GG	GG	GG	GG	GG	GG	GG	GG	GA	GG	GG	GG	GG	GG	GG	GG	GG	GG	GG	GG	GG	GG	GA	GG	GG	GG
586804	T/A	Unknown	48117889	+	TA	TT	TT	TT	TT	TT	TT	TA	TT	TT	TT	TT	TT	TT	TT	TT	TT	TT	TT	TT	TT	TT	TT	TT	TT	TT	TT	TT	TT	TT	TT	TT	TT	TT	TT	TT	TT	TA	TT	TT	TT	TT	TT	TT	TT
587886	C/T	Unknown	48206581	+	CT	CC	CC	CC	CT	CC	CC	CC	CC	CC	CC	CC	CC	CC	CC	CC	CC	CC	CC	CC	CC	CC	CC	CC	CC	CC	CC	CC	CC	CC	CC	CT	CC	CC	CC	CC	CC	CC	CT	CC	CC	CC	CC	CC	CC
588213	C/G	Unknown	48233410	+	CG	CG	CG	CG	CG	CG	CG	CG	CG	CG	CG	CG	CG	CG	GG	CG	CG	CG	CG	CG	CG	CG	CG	CG	CG	CG	CG	CG	CG	CG	CG	CG	CG	CG	CG	CG	CG	CG	CG	CG	CG	CG	CG	CG	CG
588355	G/A	Unknown	48245044	+	GG	GG	GG	GG	GG	GG	GG	GG	GG	GG	GG	GG	GG	GG	GG	GG	GG	GG	GG	GG	GG	GG	GG	GG	GG	GG	GG	GA	GG	GG	GG	GG	GG	GA	GG	GG	GG	GG	GG	GA	GA	GG	GA	GG	GG
588454	A/G	Unknown	48253157	+	AA	AA	AA	AG	AA	AA	AA	AA	AA	AA	AA	AA	AA	AA	AA	AA	AA	AA	AA	AA	AA	AA	AA	AG	AA	AG	AA	AG	AA	AA	AG	AA	AA	AA	AA	AA	AA	AA	AA	AG	AG	AA	AA	AA	AG
588892	C/T	Unknown	48289075	+	CC	CT	CC	CC	CC	CC	CC	CC	CC	CC	CC	CC	CC	CC	CC	CC	CC	CC	CC	CC	CC	CC	CC	CC	CC	CC	CC	CT	CC	CC	CC	CC	CC	CT	CC	CC	CC	CC	CC	CC	CC	CC	CC	CC	CC
589664	C/T	Unknown	48352372	+	CC	CC	CC	CC	CC	CC	CC	CC	CC	CC	CC	CC	CC	CC	CC	CC	CC	CC	CC	CC	CC	CC	CC	CC	CC	CC	CC	CC	CC	CC	CC	CC	CC	CT	CC	CC	CC	CC	CC	CC	CC	CC	CC	CC	CC
589918	C/T	Unknown	48373216	+	CC	CC	CC	CC	CC	CC	CC	CC	CC	CT	CC	CC	CC	CC	CC	CC	CC	CC	CC	CC	CC	CC	CT	CC	CC	CT	CC	CT	CC	CC	CC	CC	CC	CC	CC	CC	CC	CC	CC	CC	CC	CC	CC	CC	CC
591497	G/A	Unknown	48502704	+	GG	GG	GG	GG	GG	GG	GG	GG	GG	GG	GG	GG	GG	GG	GG	GG	GG	GG	GG	GG	GG	GG	GA	GG	GA	GG	GG	GG	GG	GG	GG	GG	GG	GA	GG	GG	GG	GG	GG	GG	GA	GG	GG	GG	GG
592125	C/A	Unknown	48554217	+	CA	CC	CC	CC	CC	CC	CC	CC	CC	CC	CC	CC	CC	CC	CC	CC	CA	CC	CC	CC	CC	CC	CC	CA	CC	CC	CC	CC	CC	CA	CC	CC	CA	CC	CC	CC	CC	CC	CC	CC	CC	CC	CC	CC	CC
592709	C/T	Unknown	48602078	+	CC	CC	CC	CC	CC	CC	CC	CT	CC	CC	CC	CC	CC	CC	CC	CT	CC	CC	CC	CC	CC	CC	CC	CC	CC	CC	CC	CC	CC	CT	CC	CC	CC	CC	CC	CT	CC	CC	CC	CT	CT	CC	CC	CC	CC
593548	C/T	Unknown	48670902	+	CT	CT	CT	CT	CT	CT	CT	CT	CT	CT	CT	CT	CT	CT	CT	CT	CT	CT	CT	CC	CT	CT	CT	CT	CT	CT	CT	CT	CT	CT	CT	CT	CT	CT	CT	CT	CT	CT	CT	CT	CT	CT	CT	CT	CT
593812	A/T	Unknown	48692513	+	AA	AA	AA	AA	AT	AA	AA	AA	AA	AA	AA	AA	AA	AA	AT	AA	AA	AA	AA	AA	AA	AA	AA	AA	AA	AT	AA	AA	AA	AA	AA	AA	AA	AA	AA	AA	AA	AA	AA	AA	AT	AA	AT	AA	AA
593812	G/C	Unknown	48692536	+	GC	GC	GC	GC	GC	GC	GC	GC	GC	GC	GC	GC	GC	GC	GC	GC	GC	GC	GC	GC	GC	GG	GC	GC	GC	GC	GC	GG	GC	GC	GC	GC	GC	GC	GC	GC	GC	GC	GC	GG	GC	GC	GC	GC	GC
594038	A/G	Unknown	48711067	+	AA	AA	AA	AA	AA	AA	AA	AA	AA	AA	AA	AA	AA	AA	AA	AA	AA	AA	AA	AA	AA	AA	AA	AA	AA	AA	AA	AA	AA	AA	AA	AA	AA	AA	AA	AA	AA	AA	AG	AA	AA	AA	AA	AA	AA
594224	T/C	Unknown	48726300	+	TC	TC	TC	TC	TC	TC	TC	TC	TC	TC	CC	TC	TC	TC	TC	TC	TC	TC	TC	TC	TC	TC	TC	TC	TC	TC	TC	TC	TC	TC	TC	TC	TC	TC	TC	TC	TC	TC	TC	TC	TC	TC	TC	TC	TC
594657	G/A	Unknown	48761809	+	GG	GG	GG	GG	GG	GG	GG	GG	GG	GG	GA	GG	GG	GG	GG	GG	GG	GG	GG	GG	GG	GG	GG	GG	GG	GG	GG	GA	GG	GG	GG	GG	GG	GG	GA	GG	GG	GG	GG	GG	GG	GG	GG	GG	GG
595781	G/A	Unknown	48853972	+	GG	GG	GG	GG	GG	GG	GG	GG	GA	GG	GG	GG	GG	GG	GG	GG	GG	GG	GG	GG	GG	GG	GG	GG	GG	GG	GG	GG	GG	GG	GG	GA	GG	GG	GG	GG	GG	GG	GG	GG	GG	GG	GG	GG	GG
596112	G/C	Unknown	48881124	+	GG	GG	GG	GG	GG	GG	GG	GG	GG	GG	GC	GG	GC	GG	GG	GG	GG	GG	GG	GG	GG	GG	GG	GG	GG	GG	GG	GC	GG	GG	GC	GG	GG	GG	GG	GG	GG	GG	GG	GG	GG	GG	GG	GG	GG
596112	G/A	Unknown	48881131	+	GG	GG	GG	GG	GA	GG	GG	GG	GG	GG	GG	GG	GG	GG	GG	GG	GG	GG	GG	GG	GG	GG	GA	GG	GG	GG	GG	GG	GG	GG	GG	GG	GG	GG	GG	GG	GG	GG	GG	GG	GG	GG	GG	GG	GA
596733	G/C	Unknown	48932035	+	GG	GG	GG	GG	GG	GG	GG	GG	GG	GG	GG	GG	GG	GG	GG	GG	GG	GG	GG	GG	GG	GG	GG	GG	GG	GG	GG	GG	GG	GG	GG	GG	GG	GG	GG	GG	GG	GC	GG	GG	GC	GG	GG	GG	GG
598570	T/G	Unknown	49082705	+	TT	TT	TT	TT	TT	TT	TT	TT	TT	TT	TT	TT	TT	TT	TT	TT	TT	TT	TT	TT	TT	TT	TT	TT	TT	TT	TT	TG	TT	TT	TT	TT	TT	TT	TT	TT	TT	TT	TG	TT	TT	TT	TT	TG	TT
599179	C/T	Unknown	49132611	+	CT	CT	CT	CT	CT	CC	CT	CT	CT	CT	CT	CT	CT	CT	CT	CT	CT	CT	CT	CT	CT	CT	CT	CT	CT	CT	CT	CC	CT	CT	CT	CT	CT	CT	CT	CT	CT	CT	CT	CT	CT	CT	CT	CT	CT
599698	T/G	Unknown	49175176	+	TG	TG	TG	TG	TG	TG	TG	TT	TG	TG	TG	TG	TG	TG	TG	TG	TT	TG	TG	TT	TG	TG	TG	TG	TG	TG	TG	TG	TT	TG	TG	TG	TG	TG	TG	TG	TG	TG	TG	TG	TG	TG	TG	TG	TG
599698	G/A	Unknown	49175200	+	GG	GA	GA	GA	GA	GG	GA	GA	GA	GA	GA	GA	GA	GA	GA	GA	GA	GA	GA	GA	GA	GA	GA	GG	GA	GG	GG	GG	GA	GA	GA	GA	GA	GA	GA	GA	GA	GA	GG	GA	GA	GA	GA	GA	GG
601197	G/T	Unknown	49298133	+	GT	GT	GT	GT	GG	GT	GT	GT	GG	GT	GG	GT	GT	GT	GT	GT	GT	GT	GG	GT	GT	GT	GT	GT	GG	GT	GT	GT	GT	GG	GT	GT	GT	GT	GT	GT	GT	GT	GT	GT	GT	GT	GG	GT	GT
602342	G/A	Unknown	49391995	+	GG	GG	GA	GG	GG	GG	GA	GG	GG	GG	GG	GG	GG	GG	GG	GG	GG	GG	GG	GG	GG	GG	GG	GG	GG	GG	GG	GG	GG	GG	GG	GG	GG	GG	GG	GG	GG	GG	GG	GG	GG	GA	GG	GG	GG
602342	G/A	Unknown	49391998	+	GA	GG	GG	GG	GG	GG	GG	GG	GG	GG	GG	GG	GG	GG	GG	GG	GG	GG	GG	GG	GG	GG	GG	GG	GG	GG	GG	GG	GG	GG	GG	GG	GG	GG	GG	GG	GG	GG	GG	GG	GG	GG	GG	GG	GG
603230	G/A	Unknown	49464800	+	GG	GG	GG	GA	GG	GA	GG	GG	GA	GG	GG	GG	GG	GG	GG	GG	GG	GG	GG	GG	GG	GG	GG	GA	GG	GG	GA	GG	GG	GG	GG	GG	GG	GG	GA	GG	GG	GG	GG	GG	GG	GG	GG	GG	GG
603249	C/T	Unknown	49466373	+	CC	CC	CC	CC	CC	CT	CC	CC	CT	CC	CC	CT	CC	CC	CC	CC	CC	CC	CC	CC	CC	CC	CC	CT	CC	CC	CC	CT	CC	CC	CC	CC	CC	CC	CC	CC	CC	CC	CC	CC	CC	CC	CC	CC	CC
603871	G/A	Unknown	49517368	+	GG	GG	GG	GG	GG	GG	GG	GA	GA	GG	GG	GG	GG	GG	GG	GG	GG	GG	GG	GG	GG	GG	GA	GG	GG	GG	GG	GG	GG	GG	GA	GG	GG	GG	GG	GG	GG	GG	GG	GG	GG	GG	GG	GG	GG
604174	G/T	Unknown	49542201	+	GG	GG	GG	GG	GG	GG	GG	GG	GG	GG	GG	GG	GG	GG	GG	GG	GG	GG	GG	GG	GG	GG	GT	GG	GT	GG	GG	GG	GG	GT	GT	GG	GG	GG	GG	GG	GG	GG	GG	GG	GG	GG	GT	GG	GG
604578	C/T	Unknown	49575368	+	CC	CC	CC	CC	CC	CC	CC	CC	CC	CC	CC	CC	CC	CC	CC	CC	CC	CC	CC	CC	CC	CC	CC	CC	CC	CC	CC	CC	CC	CC	CT	CC	CT	CT	CC	CC	CC	CC	CC	CC	CC	CC	CC	CC	CC
604864	G/C	Unknown	49598820	+	GG	GG	GG	GC	GG	GG	GG	GG	GG	GG	GG	GG	GG	GG	GG	GG	GG	GG	GG	GG	GG	GG	GG	GC	GG	GG	GG	GC	GG	GC	GG	GG	GG	GG	GG	GG	GG	GG	GG	GG	GG	GG	GC	GG	GG
605279	C/A	Unknown	49632825	+	CC	CC	CC	CC	CC	CC	CC	CC	CA	CC	CC	CC	CC	CC	CA	CC	CC	CC	CC	CC	CC	CC	CC	CC	CA	CC	CC	CC	CC	CC	CC	CC	CC	CC	CC	CC	CC	CC	CC	CC	CC	CC	CC	CC	CC
605823	C/G	Unknown	49677428	+	CG	CG	CG	CG	CG	CG	CG	CG	CG	CG	CG	CG	CG	CG	CG	CG	CG	CG	CG	CG	CG	CG	CG	CG	CG	CG	CG	CG	CG	CG	CG	CG	CG	CG	CG	CG	CG	CG	CG	CG	CG	CG	CG	CG	CG
605823	G/C	Unknown	49677430	+	GC	GC	GC	GC	GC	GC	GC	GC	GC	GC	GC	GC	GC	GC	GC	GC	GC	GC	GC	GC	GC	GC	GC	GC	GC	GC	GC	GC	GC	GC	GC	GC	GC	GC	GC	GC	GC	GC	GC	GC	GC	GC	GC	GC	GC
605918	G/C	Unknown	49685234	+	GG	GG	GG	GC	GG	GG	GG	GG	GG	GG	GG	GG	GG	GG	GC	GG	GG	GG	GG	GG	GG	GG	GG	GG	GG	GG	GG	GG	GG	GG	GG	GG	GG	GC	GG	GG	GG	GG	GG	GG	GG	GG	GC	GG	GG
606575	G/A	Unknown	49739109	+	GG	GG	GG	GG	GG	GG	GG	GG	GG	GG	GG	GG	GG	GG	GG	GG	GG	GG	GG	GG	GG	GG	GG	GG	GG	GG	GG	GG	GG	GG	GG	GA	GG	GG	GG	GG	GG	GG	GG	GG	GG	GG	GG	GG	GG
607328	C/G	Unknown	49800858	+	CG	CC	CG	CC	CG	CC	CC	CC	CG	CC	CC	CC	CG	CC	CC	CC	CC	CG	CC	CC	CC	CC	CG	CC	CC	CC	CC	CC	CC	CG	CG	CC	CC	CC	CC	CC	CC	CG	CC	CC	CG	CC	CC	CC	CC
607909	G/A	Unknown	49848474	+	GG	GG	GG	GG	GG	GG	GG	GG	GG	GG	GG	GG	GG	GG	GG	GG	GG	GG	GG	GG	GG	GG	GG	GG	GG	GG	GG	GG	GG	GG	GG	GG	GG	GA	GG	GG	GG	GG	GG	GG	GG	GG	GG	GG	GG
607960	G/A	Unknown	49852663	+	GG	GG	GG	GG	GG	GG	GG	GG	GA	GG	GG	GG	GG	GG	GG	GG	GG	GG	GG	GG	GG	GA	GG	GG	GG	GG	GG	GG	GG	GA	GA	GG	GG	GG	GG	GG	GG	GG	GG	GG	GG	GG	GG	GG	GG
609058	G/A	Unknown	49942681	+	GG	GG	GG	GG	GG	GG	GG	GG	GG	GG	GG	GG	GG	GG	GG	GG	GG	GG	GG	GG	GG	GG	GG	GG	GG	GG	GG	GG	GG	GG	GG	GG	GG	GG	GG	GG	GG	GA	GA	GA	GG	GG	GG	GG	GG
609058	G/A	Unknown	49942691	+	GG	GG	GG	GG	GG	GG	GG	GG	GG	GG	GG	GG	GG	GG	GG	GG	GG	GG	GG	GG	GG	GG	GG	GG	GG	GG	GG	GA	GG	GG	GG	GG	GG	GG	GG	GG	GG	GA	GG	GG	GG	GG	GG	GG	GG
609442	G/A	Unknown	49974180	+	GG	GG	GG	GG	GG	GG	GG	GG	GA	GG	GG	GG	GA	GG	GG	GG	GG	GG	GG	GG	GG	GG	GG	GG	GG	GG	GG	GG	GG	GG	GG	GG	GG	GG	GA	GG	GG	GG	GG	GG	GA	GG	GG	GG	GG
609484	C/G	Unknown	49977689	+	CC	CC	CC	CC	CC	CC	CC	CG	CG	CC	CC	CC	CC	CC	CC	CC	CC	CC	CC	CC	CC	CC	CC	CC	CC	CC	CC	CC	CC	CC	CC	CC	CC	CC	CC	CC	CC	CC	CC	CC	CC	CC	CC	CC	CC
609898	G/C	Unknown	50011586	+	GG	GG	GG	GG	GG	GC	GG	GG	GG	GG	GG	GG	GG	GG	GG	GG	GG	GG	GG	GG	GG	GG	GG	GG	GG	GG	GG	GG	GG	GG	GG	GG	GG	GG	GG	GG	GG	GG	GG	GG	GC	GG	GG	GG	GC
611150	C/T	Unknown	50114262	+	CT	CT	CT	CT	CT	CT	CT	CT	CT	CT	CT	CT	CT	CC	CT	CT	CC	CT	CT	CT	CT	CT	CT	CT	CT	CT	CT	CT	CT	CC	CT	CC	CT	CT	CT	CT	CT	CT	CT	CT	CT	CT	CT	CT	CT
612325	T/C	Unknown	50210615	+	TT	TT	TT	TT	TT	TT	TT	TT	TT	TT	TT	TT	TT	TT	TT	TT	TT	TT	TT	TT	TT	TT	TT	TT	TT	TT	TT	TT	TT	TT	TT	TC	TT	TT	TT	TT	TT	TT	TC	TC	TT	TC	TT	TT	TT
612408	A/G	Unknown	50217408	+	GA	GA	GA	GA	GA	GA	GA	GA	GA	GA	GA	GA	GA	GA	GA	GA	GA	GA	GA	GA	GA	GA	GA	GA	GA	GA	GA	GA	GA	GG	GA	GA	GA	GA	GA	GA	GA	GA	GA	GA	GA	GA	GA	GA	GA
612557	A/G	Unknown	50229607	+	AA	AA	AA	AA	AG	AA	AG	AA	AA	AG	AA	AA	AA	AA	AG	AA	AA	AA	AA	AA	AA	AA	AA	AA	AA	AA	AA	AA	AA	AG	AG	AA	AA	AA	AA	AA	AA	AA	AG	AA	AA	AG	AG	AA	AA
613088	A/C	Unknown	50273160	+	AA	AA	AA	AA	AA	AA	AA	AC	AA	AA	AA	AA	AA	AA	AC	AA	AA	AA	AA	AA	AA	AA	AA	AA	AA	AA	AA	AA	AA	AA	AA	AA	AA	AA	AA	AA	AC	AA	AA	AA	AA	AA	AA	AA	AA
613088	C/G	Unknown	50273217	+	CC	CC	CC	CC	CC	CC	CC	CG	CG	CC	CC	CC	CC	CC	CC	CC	CC	CC	CC	CC	CC	CC	CC	CC	CC	CC	CC	CC	CC	CC	CC	CC	CC	CC	CC	CC	CC	CC	CC	CC	CC	CC	CC	CC	CC
613370	G/T	Unknown	50296283	+	GG	GG	GG	GG	GG	GG	GT	GG	GG	GG	GG	GG	GG	GG	GG	GG	GG	GG	GG	GG	GG	GG	GG	GG	GG	GG	GG	GG	GG	GT	GG	GG	GG	GG	GG	GG	GT	GG	GG	GG	GG	GG	GG	GT	GG
613484	G/A	Unknown	50305655	+	GA	GG	GG	GG	GG	GG	GG	GG	GG	GA	GA	GG	GG	GG	GG	GG	GG	GG	GG	GG	GG	GG	GG	GA	GA	GG	GG	GG	GG	GA	GG	GG	GG	GG	GG	GG	GG	GG	GG	GG	GG	GG	GG	GG	GG
615028	A/G	Unknown	50432224	+	AA	AA	AA	AA	AA	AA	AA	AA	AA	AA	AA	AA	AA	AA	AA	AA	AA	AA	AA	AA	AA	AA	AA	AA	AA	AA	AA	AA	AA	AA	AA	AA	AA	AA	AA	AA	AA	AA	AA	AG	AA	AA	AG	AA	AA
615028	C/G	Unknown	50432257	+	CC	CC	CC	CC	CC	CC	CC	CC	CC	CC	CC	CC	CC	CC	CC	CC	CG	CC	CC	CG	CC	CC	CC	CC	CC	CC	CC	CC	CC	CC	CC	CC	CC	CC	CC	CC	CG	CC	CC	CC	CC	CC	CC	CC	CC
615028	G/A	Unknown	50432258	+	GG	GG	GG	GA	GG	GG	GA	GG	GG	GG	GG	GG	GG	GG	GG	GG	GG	GG	GG	GG	GG	GG	GA	GG	GG	GG	GG	GG	GG	GG	GG	GG	GG	GG	GG	GG	GG	GG	GG	GG	GG	GG	GG	GG	GG
615780	C/G	Unknown	50493905	+	CG	CG	CC	CG	CG	CG	CG	CG	CG	CG	CG	CG	CG	CG	CG	CG	CG	CC	CG	CG	CG	CG	CG	CG	CG	CG	CG	CG	CG	CG	CG	CG	CG	CG	CG	CG	CG	CG	CG	CG	CG	CG	CG	CG	CG
616307	G/A	Unknown	50537147	+	GG	GG	GG	GG	GG	GG	GA	GG	GA	GG	GG	GA	GG	GG	GG	GG	GG	GG	GG	GG	GG	GG	GG	GG	GG	GA	GG	GA	GG	GG	GA	GA	GG	GG	GG	GG	GG	GG	GG	GA	GG	GG	GG	GG	GG
616793	C/G	Unknown	50576966	+	CC	CC	CG	CC	CC	CC	CG	CC	CC	CC	CC	CC	CC	CC	CC	CC	CC	CC	CC	CC	CC	CC	CC	CC	CG	CC	CC	CC	CC	CC	CG	CC	CC	CC	CC	CC	CC	CC	CC	CC	CC	CC	CC	CC	CC
617277	C/A	Unknown	50616645	+	CC	CC	CC	CC	CC	CC	CC	CC	CC	CC	CC	CC	CC	CC	CC	CA	CC	CC	CC	CC	CC	CC	CC	CC	CC	CC	CC	CC	CC	CC	CC	CC	CC	CC	CC	CC	CC	CC	CC	CC	CC	CC	CC	CC	CC
617626	C/G	Unknown	50645318	+	CC	CG	CC	CC	CC	CC	CC	CG	CC	CC	CC	CC	CC	CC	CC	CC	CC	CC	CC	CC	CC	CC	CC	CG	CC	CC	CC	CC	CC	CC	CC	CC	CC	CC	CC	CC	CC	CC	CG	CC	CC	CC	CC	CC	CC
619790	G/A	Unknown	50822708	+	GG	GG	GG	GG	GG	GG	GG	GG	GG	GG	GG	GG	GG	GG	GG	GG	GG	GA	GG	GG	GG	GG	GG	GG	GG	GG	GG	GG	GG	GG	GG	GG	GG	GG	GG	GG	GG	GA	GG	GG	GG	GG	GG	GG	GG
619790	G/A	Unknown	50822713	+	GG	GG	GG	GG	GA	GG	GG	GG	GG	GG	GG	GG	GG	GG	GG	GG	GG	GG	GG	GG	GG	GG	GG	GG	GG	GG	GG	GG	GG	GG	GG	GA	GG	GG	GG	GG	GG	GG	GG	GG	GG	GG	GG	GG	GG
619790	G/A	Unknown	50822731	+	GG	GG	GG	GG	GG	GG	GG	GG	GG	GG	GG	GG	GG	GG	GA	GG	GG	GG	GG	GG	GG	GG	GG	GG	GG	GG	GG	GG	GG	GG	GG	GG	GG	GA	GG	GG	GG	GG	GG	GG	GG	GG	GG	GG	GG
619916	C/T	Unknown	50833061	+	CC	CC	CC	CC	CC	CT	CC	CC	CC	CC	CC	CC	CC	CC	CC	CC	CC	CC	CC	CC	CC	CC	CC	CC	CC	CC	CC	CC	CC	CC	CC	CC	CC	CC	CC	CC	CC	CC	CC	CC	CC	CT	CC	CC	CC
621534	A/G	Unknown	50965729	+	AA	AA	AA	AA	AG	AG	AA	AA	AA	AA	AA	AA	AA	AA	AA	AA	AA	AA	AA	AA	AA	AA	AA	AA	AA	AG	AA	AA	AA	AA	AA	AA	AA	AA	AA	AA	AA	AA	AA	AA	AA	AA	AA	AA	AA
622100	T/C	Unknown	51012132	+	TT	TT	TT	TT	TT	TT	TC	TC	TC	TT	TC	TT	TT	TC	TT	TT	TT	TC	TT	TT	TT	TT	TT	TT	TC	TT	TT	TC	TT	TC	TT	TT	TC	TT	TT	TT	TT	TT	TC	TT	TT	TC	TT	TT	TT
623628	T/C	Unknown	51137430	+	TT	TT	TT	TT	TT	TT	TT	TT	TT	TT	TC	TT	TT	TT	TT	TC	TT	TT	TC	TT	TT	TT	TT	TT	TT	TT	TC	TT	TT	TT	TT	TT	TT	TT	TT	TT	TT	TC	TT	TC	TT	TT	TT	TT	TC
623628	T/A	Unknown	51137433	+	TT	TT	TT	TT	TT	TT	TT	TT	TT	TT	TA	TA	TT	TT	TT	TA	TT	TT	TA	TT	TT	TT	TT	TT	TT	TT	TA	TT	TT	TT	TT	TT	TT	TT	TT	TT	TT	TA	TT	TA	TT	TT	TT	TT	TA
624204	C/G	Unknown	51184666	+	CC	CC	CC	CG	CC	CC	CC	CC	CC	CC	CC	CC	CG	CC	CC	CC	CG	CC	CC	CC	CC	CC	CC	CC	CC	CC	CC	CC	CC	CC	CC	CC	CC	CC	CC	CC	CC	CC	CC	CC	CC	CC	CC	CC	CC
624204	T/C	Unknown	51184695	+	TT	TT	TT	TC	TT	TT	TT	TT	TT	TT	TT	TT	TC	TT	TT	TT	TC	TT	TT	TT	TT	TT	TT	TT	TT	TT	TT	TT	TT	TT	TT	TT	TT	TT	TT	TT	TT	TT	TT	TT	TT	TT	TT	TT	TT
625917	C/G	Unknown	51325123	+	CC	CC	CC	CC	CC	CC	CC	CC	CC	CC	CC	CC	CC	CC	CC	CC	CC	CC	CC	CC	CC	CC	CC	CC	CC	CC	CC	CC	CC	CC	CC	CC	CC	CC	CC	CC	CC	CC	CC	CC	CC	CC	CC	CC	CC
626460	T/A	Unknown	51369674	+	TT	TT	TT	TT	TT	TA	TA	TT	TT	TT	TA	TT	TT	TT	TT	TT	TT	TT	TT	TT	TT	TT	TT	TA	TT	TA	TT	TT	TT	TA	TT	TA	TT	TT	TT	TT	TT	TT	TT	TT	TT	TT	TT	TT	TT
626634	C/T	Unknown	51383935	+	CC	CC	CC	CT	CC	CC	CC	CT	CC	CC	CC	CC	CC	CC	CC	CC	CC	CC	CC	CC	CC	CC	CC	CC	CC	CC	CC	CT	CC	CC	CC	CC	CC	CT	CC	CC	CC	CC	CC	CC	CC	CC	CC	CC	CC
628935	C/G	Unknown	51572598	+	CC	CC	CC	CC	CC	CC	CG	CC	CC	CG	CG	CC	CC	CC	CG	CC	CG	CC	CC	CC	CC	CC	CC	CC	CC	CC	CC	CC	CC	CC	CC	CC	CC	CG	CC	CC	CC	CC	CC	CG	CC	CC	CC	CC	CC
629606	C/G	Unknown	51627619	+	CC	CC	CC	CC	CC	CC	CC	CG	CC	CC	CC	CC	CC	CC	CC	CC	CC	CC	CC	CC	CC	CC	CC	CC	CC	CC	CC	CC	CC	CC	CC	CC	CC	CC	CC	CC	CC	CG	CC	CC	CC	CC	CC	CC	CC
630622	G/C	Unknown	51710936	+	GC	GG	GG	GC	GG	GC	GG	GC	GG	GG	GG	GC	GG	GG	GG	GG	GG	GC	GG	GG	GG	GC	GG	GG	GG	GG	GC	GC	GG	GG	GC	GG	GG	GC	GC	GG	GG	GC	GG	GG	GC	GG	GC	GG	GG
630715	G/T	Unknown	51718580	+	GT	GT	GT	GT	GT	GG	GT	GT	GT	GT	GT	GT	GT	GT	GT	GT	GT	GT	GT	GT	GT	GT	GT	GT	GT	GT	GT	GG	GT	GT	GT	GT	GT	GT	GT	GT	GG	GT	GT	GT	GT	GT	GT	GT	GT
630936	A/G	Unknown	51736691	+	AA	AG	AA	AA	AA	AA	AA	AA	AA	AA	AA	AA	AA	AA	AA	AA	AA	AA	AA	AA	AA	AA	AG	AG	AA	AG	AG	AA	AA	AA	AA	AA	AA	AA	AA	AA	AA	AA	AA	AA	AG	AA	AG	AA	AA
631054	C/T	Unknown	51746371	+	CC	CC	CC	CC	CC	CC	CC	CC	CC	CC	CC	CC	CC	CC	CC	CC	CC	CC	CC	CC	CC	CC	CC	CC	CC	CC	CC	CC	CC	CC	CC	CC	CC	CC	CC	CC	CC	CC	CC	CC	CC	CC	CC	CC	CC
632656	G/T	Unknown	51877729	+	GG	GG	GG	GG	GG	GG	GG	GG	GG	GG	GG	GT	GG	GG	GG	GG	GG	GG	GG	GG	GG	GG	GG	GG	GG	GG	GG	GG	GG	GT	GG	GG	GG	GT	GG	GG	GG	GG	GG	GG	GT	GT	GG	GG	GG
632857	C/A	Unknown	51894237	+	CC	CC	CC	CC	CA	CC	CC	CC	CC	CC	CC	CC	CC	CC	CC	CC	CC	CA	CC	CC	CC	CC	CC	CC	CC	CC	CA	CC	CC	CC	CC	CC	CC	CC	CC	CC	CC	CC	CA	CC	CC	CC	CC	CC	CC
633989	C/T	Unknown	51987040	+	CC	CC	CC	CC	CC	CC	CC	CC	CC	CC	CC	CC	CC	CC	CC	CC	CC	CC	CC	CC	CT	CC	CC	CC	CC	CC	CC	CC	CC	CC	CC	CT	CC	CC	CC	CC	CC	CC	CC	CC	CC	CC	CC	CC	CC
634318	A/G	Unknown	52014010	+	AA	AA	AA	AA	AA	AA	AA	AG	AA	AA	AA	AA	AA	AA	AA	AA	AA	AG	AA	AA	AA	AA	AG	AA	AG	AA	AA	AA	AA	AG	AA	AG	AA	AA	AG	AA	AA	AA	AA	AA	AA	AA	AG	AA	AA
634871	T/C	Unknown	52059365	+	TC	TT	TT	TT	TT	TT	TC	TT	TT	TT	TT	TT	TT	TT	TC	TT	TT	TT	TT	TT	TT	TT	TT	TT	TC	TT	TC	TT	TC	TT	TT	TC	TT	TC	TT	TT	TT	TT	TT	TT	TT	TC	TT	TT	TT
635836	G/C	Unknown	52138508	+	GC	GC	GC	GG	CC	GC	GC	GG	GG	GC	GC	GC	GG	GC	GC	GC	GC	GC	GC	GC	GC	GC	GC	GC	GC	GG	GC	GC	GC	GC	GC	GC	GC	GC	CC	GC	GC	GC	GC	GC	GG	GG	GC	GC	GC
635926	C/G	Unknown	52145864	+	CC	CC	CC	CC	CC	CC	CC	CC	CC	CC	CC	CC	CC	CC	CC	CC	CG	CG	CC	CC	CC	CC	CC	CC	CC	CC	CC	CC	CC	CG	CC	CC	CC	CC	CC	CC	CC	CG	CC	CG	CC	CC	CC	CC	CC
636796	T/C	Unknown	52217220	+	TT	TT	TT	TT	TC	TC	TC	TT	TT	TT	TT	TT	TT	TT	TT	TT	TT	TT	TT	TT	TT	TT	TT	TT	TC	TT	TT	TT	TT	TT	TT	TT	TT	TT	TT	TT	TT	TC	TT	TT	TT	TT	TC	TT	TT
638220	A/G	Unknown	52333970	+	AA	AA	AA	AA	AA	AG	AA	AA	AA	AA	AA	AA	AA	AA	AA	AA	AG	AA	AA	AA	AA	AA	AA	AA	AA	AA	AA	AA	AA	AA	AA	AA	AA	AA	AA	AA	AA	AA	AA	AA	AA	AA	AA	AA	AA
640770	C/T	Unknown	52543097	+	CC	CC	CC	CC	CT	CC	CC	CC	CC	CC	CC	CC	CC	CC	CC	CC	CT	CC	CC	CC	CC	CC	CT	CC	CC	CC	CC	CC	CC	CC	CC	CC	CC	CC	CC	CC	CC	CC	CC	CC	CT	CC	CC	CC	CC
640813	G/A	Unknown	52546601	+	GG	GA	GA	GA	GA	GG	GA	GG	GA	GG	GA	GA	GA	GA	GA	GA	GG	GA	GA	GA	GA	GA	GA	GA	GG	GA	GA	GG	GA	GG	GG	GG	GA	GG	GG	GA	GA	GG	GA	GG	GA	GA	GA	GA	GG
642327	G/A	Unknown	52670759	+	GG	GG	GG	GG	GG	GA	GG	GG	GG	GG	GG	GG	GG	GG	GA	GG	GG	GG	GG	GG	GG	GG	GG	GG	GG	GG	GG	GG	GG	GA	GG	GG	GA	GG	GG	GG	GG	GA	GG	GG	GG	GA	GG	GA	GG
642405	T/A	Unknown	52677131	+	TT	TT	TT	TT	TA	TT	TT	TT	TT	TT	TT	TT	TT	TT	TT	TT	TT	TT	TT	TT	TT	TT	TA	TT	TT	TT	TT	TT	TT	TT	TT	TT	TT	TT	TT	TT	TT	TT	TT	TT	TT	TT	TT	TT	TT
642461	C/G	Unknown	52681774	+	CC	CC	CC	CC	CC	CC	CG	CC	CC	CG	CC	CC	CC	CC	CC	CC	CC	CC	CC	CC	CC	CC	CC	CC	CC	CG	CC	CC	CC	CG	CC	CC	CC	CC	CC	CC	CC	CC	CC	CC	CC	CC	CC	CC	CC
643407	T/C	Unknown	52759332	+	TC	TC	TC	TC	TC	TC	TT	TC	TT	TC	TC	TT	TC	TC	TT	TC	TC	TC	TC	TC	TC	TC	TT	TC	TC	TC	TT	TC	TC	TC	TT	TC	TC	TC	TC	TC	TT	TC	TT	TC	TT	TC	TT	TT	TT
643776	G/C	Unknown	52789568	+	GG	GG	GG	GG	GG	GG	GG	GC	GG	GG	GG	GG	GG	GG	GG	GG	GG	GG	GG	GG	GG	GG	GG	GG	GG	GG	GG	GG	GG	GG	GC	GG	GG	GG	GG	GG	GG	GG	GG	GG	GG	GG	GG	GG	GG
643805	G/A	Unknown	52791951	+	GA	GA	GA	GG	GA	GA	GA	GA	GG	GA	GA	GA	GA	GA	GA	GA	GA	GA	GA	GG	GG	GA	GA	GG	GA	GA	GA	GA	GG	GA	GA	GA	GA	GA	GA	GA	GA	GA	GA	GA	GA	GA	GA	GG	GA
644208	C/T	Unknown	52824994	+	CC	CC	CC	CC	CT	CC	CC	CT	CT	CC	CC	CC	CC	CC	CC	CC	CC	CC	CC	CC	CC	CC	CC	CC	CC	CC	CT	CC	CC	CC	CC	CC	CC	CC	CT	CC	CC	CC	CC	CC	CC	CC	CC	CC	CC
645309	T/G	Unknown	52915272	+	TT	TT	TT	TT	TT	TT	TT	TT	TG	TT	TG	TT	TT	TT	TT	TT	TG	TT	TT	TT	TT	TT	TT	TT	TT	TT	TT	TT	TT	TG	TT	TT	TT	TG	TT	TT	TT	TT	TT	TT	TG	TT	TT	TT	TT
645309	C/T	Unknown	52915285	+	CC	CC	CC	CC	CC	CC	CT	CT	CC	CC	CC	CC	CC	CC	CC	CC	CC	CC	CC	CC	CC	CC	CC	CC	CT	CC	CC	CT	CC	CC	CC	CT	CC	CC	CC	CC	CC	CC	CC	CC	CC	CT	CC	CC	CC
645892	A/C	Unknown	52963081	+	AC	AC	AC	AC	AC	AC	AC	AC	AC	AC	AC	AC	AC	AC	AC	AC	AC	AC	AC	AC	AC	AC	AC	AC	AC	AC	AA	AC	AC	AC	AC	AC	AC	AC	AC	AC	AC	AA	AC	AC	AC	AC	AC	AC	AC
648099	C/T	Unknown	53144059	+	CC	CC	CC	CT	CC	CC	CC	CC	CC	CC	CC	CC	CC	CC	CC	CC	CC	CC	CC	CC	CC	CC	CC	CC	CT	CC	CC	CC	CC	CC	CC	CC	CC	CC	CC	CC	CC	CC	CC	CC	CC	CC	CC	CC	CC
651662	G/A	Unknown	53436218	+	GG	GA	GG	GG	GG	GG	GG	GG	GG	GG	GG	GG	GG	GG	GA	GG	GG	GG	GG	GG	GG	GG	GG	GG	GG	GG	GG	GA	GG	GA	GG	GA	GG	GG	GG	GG	GG	GG	GA	GG	GG	GG	GG	GG	GG
652232	C/T	Unknown	53482982	+	CC	CC	CC	CC	CC	CC	CC	CT	CT	CC	CC	CC	CC	CC	CC	CC	CC	CC	CC	CC	CT	CC	CT	CC	CC	CC	CC	CC	CT	CC	CC	CC	CC	CC	CC	CC	CC	CC	CC	CC	CC	CC	CC	CC	CC
652399	C/T	Unknown	53496682	+	CC	CC	CC	CT	CC	CC	CT	CC	CC	CC	CC	CC	CC	CC	CT	CC	CC	CC	CC	CC	CC	CC	CC	CC	CC	CC	CT	CC	CC	CT	CC	CC	CC	CC	CC	CC	CC	CC	CC	CC	CC	CC	CC	CC	CC
653627	C/T	Unknown	53597357	+	CC	CC	CC	CC	CC	CC	CC	CC	CC	CC	CC	CC	CT	CC	CC	CC	CC	CC	CC	CC	CC	CC	CC	CC	CC	CC	CC	CC	CC	CC	CC	CC	CC	CC	CC	CC	CC	CC	CC	CC	CC	CC	CC	CC	CC
654407	G/A	Unknown	53661300	+	GA	GA	GA	GA	GA	GA	GA	GA	GA	GG	GA	GA	GA	GG	GA	GA	GG	GA	GA	GA	GA	GA	GA	GA	GA	GA	GA	GA	GA	GA	GA	GA	GA	GA	GA	GA	GA	GA	GG	GA	GA	GA	GA	GA	GA
654455	G/A	Unknown	53665261	+	GA	GA	GA	GA	GA	GA	GG	GA	GG	GA	GA	GA	GA	GA	GG	GA	GA	GA	GA	GA	GA	GA	GA	GA	GG	GA	GG	GG	GA	GG	GA	GA	GA	GG	GA	GA	GA	GA	GA	GA	GA	GA	GG	GA	GA
654883	G/A	Unknown	53700367	+	GG	GG	GG	GG	GG	GG	GG	GG	GG	GG	GG	GG	GG	GG	GG	GA	GG	GG	GG	GG	GG	GG	GG	GG	GG	GG	GA	GA	GG	GG	GA	GG	GG	GG	GG	GG	GA	GG	GA	GG	GG	GG	GA	GG	GG
655301	C/T	Unknown	53734645	+	CC	CC	CC	CC	CC	CC	CC	CC	CC	CC	CC	CC	CC	CC	CC	CC	CC	CT	CC	CC	CC	CC	CC	CC	CC	CC	CC	CC	CC	CC	CC	CC	CC	CC	CC	CC	CC	CT	CC	CC	CC	CC	CC	CC	CT
657343	G/C	Unknown	53902102	+	GG	GG	GG	GG	GG	GG	GG	GG	GC	GG	GG	GG	GG	GG	GG	GG	GC	GG	GG	GG	GG	GG	GG	GG	GG	GG	GG	GG	GG	GG	GG	GC	GG	GG	GC	GG	GG	GC	GG	GG	GG	GG	GG	GG	GG
657924	G/A	Unknown	53949710	+	GG	GA	GG	GG	GG	GG	GG	GG	GA	GG	GG	GG	GG	GG	GG	GG	GG	GG	GG	GG	GG	GG	GG	GG	GG	GG	GG	GG	GG	GA	GG	GA	GG	GG	GG	GG	GG	GG	GG	GG	GG	GG	GG	GG	GG
659114	A/G	Unknown	54047294	+	AA	AA	AA	AA	AA	AA	AA	AA	AA	AA	AA	AG	AA	AA	AA	AA	AA	AA	AA	AA	AA	AA	AA	AA	AA	AA	AA	AA	AG	AA	AA	AA	AA	AA	AA	AA	AA	AA	AG	AA	AA	AA	AA	AA	AA
659114	G/A	Unknown	54047329	+	GG	GG	GG	GG	GG	GG	GG	GG	GG	GG	GG	GG	GA	GG	GG	GG	GG	GG	GG	GG	GG	GG	GG	GG	GG	GG	GG	GG	GG	GG	GG	GG	GG	GG	GG	GG	GG	GG	GA	GG	GG	GG	GG	GG	GG
659147	G/A	Unknown	54049998	+	GA	GA	GA	GA	GG	GG	GA	GA	GA	GA	GA	GA	GA	GA	GA	GA	GA	GA	GA	GA	GA	GA	GA	GG	GA	GA	GA	GA	GA	GA	GA	GA	GA	GA	GA	GA	GA	GA	GG	GA	GA	GA	GA	GA	GA
659168	C/T	Unknown	54051700	+	CT	CC	CC	CC	CC	CC	CC	CT	CT	CC	CC	CC	CC	CC	CC	CC	CC	CC	CC	CC	CC	CC	CC	CC	CC	CC	CC	CC	CC	CC	CC	CC	CT	CC	CT	CC	CC	CC	CC	CC	CC	CC	CC	CC	CC
660117	G/T	Unknown	54129565	+	GG	GG	GG	GG	GG	GG	GG	GG	GG	GG	GG	GG	GG	GG	GG	GG	GT	GG	GG	GG	GG	GG	GG	GG	GG	GG	GG	GG	GG	GT	GG	GG	GG	GG	GT	GG	GG	GG	GT	GG	GG	GG	GT	GG	GG
662178	C/T	Unknown	54298576	+	CC	CC	CC	CC	CC	CC	CC	CC	CC	CC	CC	CC	CC	CC	CC	CC	CC	CC	CC	CC	CC	CC	CC	CC	CC	CC	CC	CC	CT	CC	CC	CT	CC	CC	CC	CC	CC	CC	CC	CC	CC	CC	CC	CC	CC
664944	T/C	Unknown	54525339	+	TT	TT	TT	TT	TT	TT	TT	TT	TT	TT	TC	TT	TT	TT	TT	TT	TT	TT	TT	TT	TT	TT	TT	TC	TT	TT	TC	TT	TT	TT	TT	TT	TT	TT	TT	TT	TT	TT	TT	TT	TC	TC	TC	TT	TT
665007	G/T	Unknown	54530536	+	GG	GG	GG	GG	GT	GG	GG	GT	GG	GG	GG	GG	GG	GG	GG	GG	GG	GG	GG	GG	GG	GG	GG	GT	GG	GT	GG	GG	GG	GG	GG	GT	GG	GG	GG	GG	GG	GG	GG	GT	GT	GG	GG	GG	GG
665366	A/G	Unknown	54559961	+	AA	AA	AA	AA	AA	AA	AG	AG	AG	AA	AA	AA	AA	AA	AG	AA	AA	AA	AA	AG	AG	AA	AA	AA	AA	AA	AA	AG	AA	AG	AA	AG	AA	AG	AA	AA	AG	AA	AG	AG	AA	AG	AA	AA	AG
666699	G/C	Unknown	54669244	+	GG	GG	GG	GG	GC	GC	GG	GG	GG	GG	GG	GG	GG	GG	GG	GG	GG	GC	GG	GG	GG	GG	GG	GG	GG	GG	GG	GG	GC	GG	GG	GG	GG	GG	GG	GG	GG	GG	GG	GG	GG	GG	GG	GG	GG
666821	G/T	Unknown	54679262	+	GG	GG	GG	GG	GG	GG	GG	GG	GG	GG	GG	GG	GG	GG	GG	GG	GG	GG	GG	GG	GG	GG	GG	GG	GG	GG	GG	GG	GG	GG	GG	GG	GG	GG	GG	GG	GG	GG	GG	GG	GG	GG	GG	GG	GG
666821	C/T	Unknown	54679304	+	CC	CC	CC	CC	CC	CC	CC	CC	CC	CC	CC	CC	CC	CC	CC	CC	CC	CC	CC	CC	CC	CC	CC	CC	CC	CC	CC	CC	CC	CC	CC	CC	CC	CC	CC	CC	CC	CC	CC	CC	CC	CC	CC	CC	CC
667306	G/A	Unknown	54719036	+	GA	GG	GG	GG	GG	GA	GG	GA	GG	GG	GG	GG	GG	GG	GG	GG	GG	GG	GG	GG	GG	GA	GA	GA	GG	GG	GG	GA	GG	GG	GA	GG	GG	GG	GG	GG	GG	GG	GG	GG	GG	GA	GG	GG	GG
669115	C/T	Unknown	54867358	+	CC	CC	CC	CC	CC	CC	CC	CT	CC	CC	CC	CC	CC	CC	CC	CC	CC	CC	CC	CC	CC	CT	CC	CC	CC	CC	CC	CC	CC	CC	CC	CC	CC	CC	CC	CC	CC	CC	CC	CT	CC	CC	CC	CC	CC
669115	C/T	Unknown	54867359	+	CC	CC	CC	CC	CC	CC	CT	CC	CC	CC	CC	CC	CC	CC	CC	CC	CT	CC	CC	CC	CC	CC	CC	CC	CC	CC	CT	CC	CC	CT	CT	CC	CC	CC	CC	CC	CC	CC	CC	CC	CC	CC	CC	CC	CC
670222	G/C	Unknown	54958133	+	GG	GC	GG	GC	GG	GC	GC	GG	GG	GG	GG	GG	GG	GG	GC	GG	GG	GC	GG	GG	GG	GG	GG	GG	GC	GG	GG	GG	GG	GC	GG	GG	GG	GG	GG	GG	GG	GG	GG	GG	GG	GG	GG	GG	GG
670930	G/A	Unknown	55016199	+	GG	GG	GG	GG	GG	GG	GG	GG	GG	GG	GG	GG	GG	GG	GG	GG	GA	GG	GG	GG	GG	GG	GG	GA	GG	GG	GG	GG	GG	GG	GG	GG	GG	GG	GG	GG	GG	GG	GA	GG	GG	GG	GA	GG	GG
676708	G/A	Unknown	55489999	+	GA	GG	GG	GG	GG	GG	GG	GG	GG	GG	GG	GG	GA	GG	GG	GA	GG	GG	GG	GG	GG	GG	GG	GG	GG	GG	GG	GG	GG	GA	GG	GG	GG	GG	GG	GG	GG	GG	GG	GG	GG	GG	GG	GG	GG
676708	G/C	Unknown	55490014	+	GG	GG	GG	GG	GG	GG	GC	GG	GG	GG	GG	GG	GG	GG	GG	GG	GG	GG	GG	GG	GG	GG	GG	GG	GG	GG	GG	GG	GG	GG	GG	GG	GG	GG	GG	GG	GG	GG	GG	GG	GG	GG	GG	GG	GG
676844	G/T	Unknown	55501138	+	GG	GG	GG	GG	GG	GT	GG	GG	GG	GG	GG	GT	GG	GG	GG	GG	GG	GG	GG	GG	GG	GG	GG	GG	GT	GG	GT	GG	GG	GG	GG	GG	GG	GG	GG	GG	GG	GG	GG	GG	GG	GG	GG	GG	GG
678332	G/A	Unknown	55623148	+	GG	GG	GG	GG	GG	GG	GG	GG	GG	GA	GG	GG	GG	GG	GG	GG	GG	GG	GG	GG	GG	GG	GG	GG	GG	GG	GG	GG	GG	GG	GG	GG	GG	GG	GG	GG	GG	GG	GG	GG	GG	GG	GG	GG	GG
678332	C/A	Unknown	55623190	+	CC	CC	CC	CC	CC	CC	CC	CC	CC	CA	CC	CC	CC	CC	CC	CC	CC	CC	CC	CC	CC	CC	CC	CC	CC	CC	CC	CC	CC	CC	CC	CC	CC	CC	CC	CC	CC	CC	CC	CC	CC	CC	CC	CC	CC
680305	C/G	Unknown	55784946	+	CG	CG	CG	CG	CG	CG	CG	CG	CG	CG	CG	CG	CG	CG	CG	CG	CG	CG	CG	CG	CG	CG	CG	CG	CG	CG	CG	CG	CG	CG	CG	CG	CC	CG	CG	CG	CG	CG	CC	CG	CG	CG	CG	CG	CG
680362	G/C	Unknown	55789614	+	GG	GG	GG	GC	GC	GG	GG	GG	GC	GG	GG	GG	GG	GG	GG	GG	GG	GG	GG	GG	GG	GG	GG	GG	GC	GG	GG	GG	GG	GG	GG	GG	GG	GG	GG	GG	GG	GG	GG	GC	GG	GG	GG	GG	GG
680594	C/T	Unknown	55808656	+	CC	CC	CC	CT	CC	CC	CC	CC	CT	CC	CC	CC	CC	CC	CC	CC	CC	CC	CC	CC	CC	CC	CC	CC	CC	CC	CC	CC	CC	CC	CT	CC	CC	CC	CC	CC	CC	CC	CC	CC	CT	CC	CC	CC	CC
680889	C/G	Unknown	55832836	+	CC	CC	CC	CC	CC	CC	CG	CC	CC	CC	CC	CC	CC	CC	CC	CC	CC	CC	CC	CC	CC	CC	CC	CC	CC	CC	CC	CG	CC	CC	CC	CC	CC	CG	CC	CC	CC	CC	CC	CC	CC	CC	CC	CC	CG
680889	G/C	Unknown	55832839	+	GG	GG	GG	GG	GG	GG	GC	GG	GG	GG	GG	GG	GG	GG	GG	GG	GG	GG	GG	GG	GG	GG	GG	GG	GG	GG	GG	GC	GG	GG	GG	GG	GG	GC	GG	GG	GG	GG	GG	GG	GG	GG	GG	GG	GC
681006	A/T	Unknown	55842434	+	AA	AA	AA	AA	AA	AA	AA	AA	AT	AA	AA	AA	AA	AA	AA	AA	AA	AA	AA	AA	AA	AA	AA	AA	AA	AA	AA	AT	AA	AA	AA	AA	AA	AA	AA	AA	AA	AA	AA	AA	AA	AA	AA	AA	AA
681349	C/T	Unknown	55870557	+	CC	CT	CT	CC	CT	CC	CC	CC	CT	CT	CT	CC	CT	CC	CC	CT	CT	CC	CT	CC	CT	CT	CC	CC	CC	CT	CC	CC	CT	CT	CC	CT	CT	CT	CC	CT	CC	CT	CT	CC	CT	CT	CC	CT	CT
681375	G/A	Unknown	55872706	+	GG	GG	GG	GG	GG	GA	GG	GG	GA	GG	GG	GG	GG	GG	GA	GG	GG	GG	GG	GG	GG	GG	GG	GG	GG	GG	GG	GG	GG	GG	GG	GA	GG	GG	GG	GG	GG	GG	GG	GG	GG	GA	GG	GG	GG
681540	C/T	Unknown	55886217	+	CT	CT	CT	CT	CT	CT	CT	CT	CT	CT	CC	CT	CT	CC	CT	CT	CT	CT	CT	CT	CT	CT	CT	CT	CT	CT	CT	CT	CT	CT	CT	CT	CT	CT	CT	CT	CT	CT	CT	CT	CT	CT	CT	CT	CT
681624	C/G	Unknown	55893124	+	CG	CG	CG	CG	CG	CG	CG	CG	CG	CG	CG	CG	CG	CG	CC	CG	CG	CG	CG	CG	CG	CG	CG	CG	CG	CG	CG	CG	CG	CG	CG	CG	CG	CG	GG	CG	CC	CG	CG	CG	CG	CG	CG	CG	CG
682137	A/G	Unknown	55935170	+	AG	AA	AG	AG	AG	AG	AG	AG	AA	AA	AG	AG	AG	AA	AA	AG	AG	AG	AG	AG	AG	AG	AG	AA	AG	AG	AG	AG	AG	AG	AG	AG	AG	AG	AG	AG	AG	AG	AG	AG	AG	AG	AG	AG	AG
682137	G/A	Unknown	55935182	+	GA	GA	GA	GA	GA	GG	GA	GA	GA	GA	GA	GA	GG	GA	GA	GA	GA	GA	GA	GA	GG	GA	GG	GA	GG	GA	GA	GG	GA	GA	GA	GA	GA	GA	GA	GA	GA	GA	GA	GG	GA	GA	GA	GA	GA
682338	T/C	Unknown	55951644	+	TC	TC	TC	TC	TT	TT	TT	TC	TC	TT	TT	TT	TC	TC	TC	TT	TC	TC	TC	TC	TC	TT	TT	TC	TT	TC	TC	TC	TC	TT	TT	TT	TC	TT	TC	TC	TC	TC	TC	TC	TC	TT	TC	TC	TT
682391	C/G	Unknown	55956042	+	CC	CC	CC	CC	CC	CC	CC	CC	CC	CC	CC	CC	CC	CC	CC	CC	CC	CC	CC	CC	CC	CC	CC	CC	CC	CG	CG	CC	CC	CC	CC	CC	CC	CC	CC	CC	CC	CC	CC	CC	CC	CC	CC	CC	CC
682449	G/A	Unknown	55960755	+	GG	GA	GA	GA	GA	GA	GA	GA	GA	GA	GA	GA	GA	GA	GA	GA	GA	GA	GA	GA	GA	GA	GG	GA	GA	GA	GA	GA	GA	GA	GA	GA	GA	GA	GA	GA	GA	GA	GA	GA	GA	GG	GA	GA	GA
682489	G/T	Unknown	55964059	+	GG	GG	GG	GT	GG	GG	GG	GG	GG	GT	GG	GG	GT	GG	GG	GG	GG	GT	GG	GG	GG	GG	GG	GG	GG	GG	GG	GG	GG	GG	GG	GG	GG	GG	GG	GG	GG	GG	GG	GG	GG	GG	GG	GG	GG
682562	G/A	Unknown	55970017	+	GG	GG	GG	GG	GG	GG	GG	GG	GG	GG	GG	GG	GG	GG	GG	GG	GA	GG	GG	GG	GG	GG	GG	GG	GG	GG	GG	GG	GG	GG	GG	GG	GG	GG	GG	GG	GG	GG	GG	GG	GG	GG	GG	GG	GG
682562	G/A	Unknown	55970031	+	GG	GG	GG	GG	GG	GG	GG	GG	GG	GG	GA	GA	GG	GG	GG	GG	GG	GG	GG	GG	GG	GG	GG	GG	GG	GG	GG	GG	GG	GG	GA	GG	GG	GG	GG	GG	GG	GG	GG	GA	GG	GG	GG	GG	GG
682727	G/A	Unknown	55983558	+	GG	GG	GG	GG	GG	GA	GG	GG	GG	GG	GG	GG	GG	GG	GG	GG	GG	GG	GG	GG	GG	GG	GG	GG	GG	GG	GG	GG	GG	GG	GG	GG	GG	GG	GA	GG	GG	GG	GA	GG	GG	GG	GG	GG	GG
683465	G/A	Unknown	56044089	+	GA	GA	GA	GA	GA	GG	GG	GG	GA	GA	GA	GA	GA	GA	GG	GA	GA	GG	GG	GA	GA	GA	GA	GA	GA	GA	GA	GA	GA	GA	GA	GA	GA	GA	GA	GA	GG	GG	GA	GA	GA	GA	GA	GA	GA
683465	A/G	Unknown	56044092	+	AG	AG	AG	AG	AG	AG	AG	AG	AG	AA	AG	AA	AG	AG	AG	AG	AG	AG	AG	AG	AG	AG	AA	AG	AG	AG	AG	AG	AG	AG	AG	AG	AG	AG	AG	AG	AG	AG	AG	AG	AG	AG	AG	AG	AG
683605	C/A	Unknown	56055549	+	CA	CA	CC	CC	CA	CC	CC	CC	CA	CC	CA	CA	CA	CC	CA	CC	CC	CC	CA	CC	CA	CC	CC	CC	CC	CA	CC	CC	CC	CC	CC	CA	CC	CC	CC	CC	CC	CC	CC	CA	CC	CA	CC	CA	CC
683824	C/T	Unknown	56073496	+	CC	CC	CC	CC	CC	CT	CC	CC	CC	CC	CC	CC	CC	CC	CC	CC	CC	CC	CC	CC	CC	CC	CC	CC	CC	CC	CC	CC	CC	CC	CC	CC	CC	CC	CC	CC	CC	CC	CC	CC	CC	CC	CC	CC	CC
683824	G/C	Unknown	56073523	+	GG	GG	GG	GG	GG	GG	GG	GG	GG	GG	GG	GG	GC	GG	GG	GG	GG	GG	GG	GG	GG	GG	GG	GG	GG	GG	GG	GG	GG	GG	GG	GG	GG	GG	GG	GG	GG	GG	GG	GG	GG	GG	GG	GG	GG
684302	T/A	Unknown	56112702	+	TT	TT	TT	TT	TT	TT	TT	TT	TT	TT	TT	TT	TT	TT	TT	TT	TT	TA	TT	TT	TT	TT	TA	TT	TT	TT	TT	TT	TT	TT	TT	TT	TT	TT	TT	TT	TT	TT	TA	TT	TT	TA	TT	TT	TA
684568	C/T	Unknown	56134514	+	CC	CC	CC	CC	CC	CC	CC	CC	CT	CC	CC	CC	CC	CC	CC	CC	CC	CC	CC	CC	CC	CC	CC	CC	CC	CC	CC	CC	CC	CC	CC	CC	CC	CC	CC	CC	CC	CC	CC	CC	CC	CC	CC	CC	CC
684851	G/A	Unknown	56157714	+	GA	GA	GA	GA	GA	GG	GA	GA	GA	GA	GA	GA	GA	GA	GA	GA	GA	GA	GA	GA	GA	GA	GA	GA	GA	GA	GA	GA	GA	GA	GA	GA	GA	GA	GA	GA	GA	GA	GA	GA	GA	GG	GA	GA	GA
684851	C/T	Unknown	56157731	+	CT	CT	CT	CT	CT	CC	CT	CT	CT	CT	CT	CT	CT	CT	CT	CT	CT	CT	CT	CT	CT	CT	CT	CT	CT	CT	CT	CT	CT	CT	CT	CT	CT	CT	CT	CT	CT	CT	CT	CT	CT	CC	CT	CT	CT
685369	A/C	Unknown	56200202	+	AA	AA	AA	AC	AA	AA	AA	AA	AA	AA	AA	AA	AC	AA	AA	AA	AA	AC	AA	AA	AA	AA	AA	AA	AA	AA	AA	AA	AC	AA	AA	AA	AA	AA	AA	AA	AA	AA	AA	AA	AA	AA	AA	AA	AC
685684	G/A	Unknown	56226056	+	GG	GG	GA	GG	GG	GG	GG	GG	GG	GG	GG	GG	GG	GG	GG	GG	GG	GG	GG	GG	GG	GA	GG	GG	GG	GG	GG	GG	GG	GA	GA	GG	GG	GG	GG	GG	GG	GG	GG	GA	GG	GG	GG	GG	GG
685697	G/A	Unknown	56227118	+	GG	GG	GG	GG	GG	GG	GG	GG	GG	GG	GG	GG	GG	GG	GG	GG	GG	GG	GG	GG	GG	GG	GG	GG	GG	GG	GG	GG	GG	GG	GG	GG	GG	GG	GG	GG	GG	GG	GG	GG	GG	GG	GG	GG	GG
685879	G/A	Unknown	56242025	+	GA	GA	GA	GA	GA	GA	GA	GA	GA	GA	GA	GA	GA	GA	GA	GA	GA	GA	GA	GA	GA	GA	GA	GG	GA	GA	GA	GA	GA	GA	GA	GA	GA	GA	GA	GA	AA	GA	GA	GA	GA	GA	GA	GA	GA
686090	T/C	Unknown	56259322	+	TT	TT	TT	TT	TT	TT	TT	TT	TT	TT	TT	TC	TT	TT	TT	TT	TT	TT	TT	TT	TT	TT	TT	TT	TT	TT	TT	TC	TT	TT	TT	TT	TT	TT	TT	TT	TT	TT	TC	TC	TT	TT	TT	TT	TT
686127	G/A	Unknown	56262357	+	GG	GG	GG	GG	GA	GG	GG	GG	GG	GA	GG	GG	GG	GG	GG	GG	GG	GG	GG	GG	GG	GG	GG	GG	GG	GG	GG	GG	GG	GG	GA	GG	GG	GG	GG	GG	GG	GG	GG	GG	GA	GG	GG	GG	GA
686227	T/A	Unknown	56270562	+	TT	TT	TT	TT	TT	TT	TA	TT	TT	TT	TT	TT	TA	TT	TA	TT	TT	TT	TT	TT	TT	TT	TT	TT	TA	TT	TT	TT	TT	TT	TT	TT	TT	TT	TT	TT	TT	TT	TT	TA	TT	TT	TT	TT	TT
686227	A/T	Unknown	56270615	+	AA	AA	AA	AA	AA	AA	AT	AA	AA	AA	AA	AA	AT	AA	AT	AA	AA	AA	AA	AA	AA	AA	AA	AA	AT	AA	AA	AA	AA	AA	AA	AA	AA	AA	AA	AA	AA	AA	AA	AT	AA	AA	AA	AA	AA
686289	C/G	Unknown	56275653	+	CC	CC	CC	CC	CC	CC	CC	CC	CC	CC	CC	CC	CC	CC	CC	CC	CC	CC	CC	CC	CC	CC	CC	CC	CC	CC	CC	CC	CC	CG	CC	CC	CC	CC	CC	CC	CC	CC	CC	CC	CC	CC	CC	CC	CC
686307	T/G	Unknown	56277143	+	TT	TT	TT	TT	TT	TT	TG	TT	TT	TT	TT	TT	TT	TT	TT	TT	TT	TG	TT	TT	TT	TT	TG	TG	TT	TG	TG	TT	TT	TT	TT	TT	TT	TT	TT	TT	TT	TG	TT	TT	TT	TT	TT	TT	TG
686578	G/A	Unknown	56299329	+	GG	GG	GG	GG	GA	GA	GG	GA	GA	GG	GG	GG	GG	GG	GG	GG	GG	GG	GG	GA	GA	GA	GG	GA	GG	GA	GG	GG	GG	GG	GG	GG	GG	GG	GG	GG	GG	GG	GA	GG	GG	GA	GG	GG	GG
686750	C/T	Unknown	56313448	+	CC	CC	CC	CC	CC	CC	CC	CC	CC	CT	CC	CC	CC	CT	CT	CC	CC	CC	CC	CC	CC	CC	CC	CC	CC	CC	CC	CC	CC	CC	CC	CC	CC	CC	CC	CC	CC	CC	CT	CC	CC	CC	CC	CC	CC
686982	C/T	Unknown	56332452	+	CC	CT	CC	CC	CT	CT	CT	CT	CC	CT	CC	CT	CC	CC	CT	CT	CT	CC	CC	CC	CT	CC	CC	CT	CT	CT	CC	CC	CC	CT	CC	CT	CT	CT	CC	CC	CT	CT	CC	CC	CC	CT	CT	CT	CC
686982	C/T	Unknown	56332491	+	CC	CC	CC	CC	CC	CT	CC	CC	CC	CC	CC	CC	CC	CC	CC	CC	CC	CC	CC	CC	CT	CC	CC	CC	CC	CC	CC	CC	CC	CC	CC	CC	CC	CC	CC	CC	CC	CC	CC	CC	CC	CC	CC	CC	CC
687103	T/C	Unknown	56342384	+	TC	TC	TC	TC	TC	TC	TC	TC	TC	TC	TC	TC	TC	TC	TC	TC	TC	TC	TC	TC	TC	TC	TT	TC	TC	TC	TC	TC	TC	TC	TC	TT	TC	TC	TC	TC	TC	TC	TC	TC	TC	TC	TC	TC	TC
687682	C/T	Unknown	56389856	+	CC	CC	CC	CC	CC	CC	CT	CC	CC	CC	CT	CC	CC	CC	CC	CC	CC	CC	CC	CC	CC	CT	CC	CC	CC	CT	CC	CC	CT	CC	CC	CC	CC	CC	CC	CC	CC	CT	CC	CC	CC	CC	CC	CC	CC
688146	G/A	Unknown	56427918	+	GA	GA	GG	GG	GG	GG	GG	GG	GG	GG	GA	GG	GG	GG	GG	GG	GG	GG	GG	GG	GA	GG	GG	GG	GG	GG	GG	GG	GG	GG	GG	GA	GG	GA	GG	GG	GG	GG	GG	GG	GG	GA	GG	GG	GG
688544	G/A	Unknown	56460569	+	GG	GG	GG	GG	GA	GG	GG	GA	GG	GG	GG	GG	GG	GG	GG	GG	GG	GG	GG	GA	GA	GG	GG	GG	GG	GG	GG	GG	GA	GG	GG	GG	GG	GG	GG	GG	GG	GG	GG	GG	GA	GG	GG	GG	GG
689885	A/C	Unknown	56570520	+	AC	AC	AC	AC	AC	AC	AC	AC	AC	AC	AA	AC	AC	AC	AA	AC	AC	AC	AC	AC	AC	AC	AC	AC	AC	AC	AC	AC	AC	AC	AC	AC	AC	AC	AC	AC	AA	AC	AC	AC	AC	AC	AC	AC	AC
689897	G/A	Unknown	56571481	+	GG	GG	GG	GG	GG	GG	GG	GG	GG	GG	GG	GG	GG	GG	GG	GG	GG	GG	GG	GG	GG	GG	GA	GA	GG	GG	GG	GG	GG	GG	GG	GG	GG	GG	GG	GG	GG	GG	GG	GG	GG	GG	GG	GG	GG
689934	G/A	Unknown	56574548	+	GG	GG	GG	GG	GG	GG	GG	GG	GG	GG	GG	GG	GG	GG	GG	GG	GG	GG	GG	GG	GG	GG	GG	GG	GG	GG	GG	GG	GG	GG	GG	GG	GG	GG	GG	GG	GG	GG	GA	GG	GG	GG	GG	GG	GG
690733	C/T	Unknown	56640038	+	CC	CC	CC	CC	CC	CC	CC	CC	CC	CC	CC	CT	CC	CC	CC	CC	CC	CC	CC	CC	CC	CC	CC	CC	CC	CC	CC	CC	CC	CC	CC	CC	CC	CC	CC	CC	CC	CC	CC	CC	CC	CC	CC	CC	CC
690733	G/C	Unknown	56640044	+	GC	GC	GC	GC	GC	GC	GC	GC	GC	GC	GC	GC	GC	GC	GC	GC	GC	GC	GC	GC	GC	GC	GC	GC	GC	GC	GC	GC	GC	GC	GC	GC	GC	GC	GC	GC	GC	GC	GC	GC	GC	GC	GC	GC	GC
690796	T/C	Unknown	56645260	+	TC	TC	TC	TC	TC	TC	TC	TT	TC	TT	TC	TC	TC	TC	TC	TC	TC	TC	TC	TC	TC	TC	TC	TC	TC	TC	TC	TC	TC	TC	TC	TC	TC	TC	TC	TC	TC	TC	TC	TC	TC	TC	TC	TC	TC
690892	C/A	Unknown	56653088	+	AC	AC	AC	AC	AC	AC	AC	AA	AC	AC	AC	AC	AC	AC	AC	AC	AC	AC	AC	AC	AC	AC	AC	AC	AC	AC	AA	AC	AC	AC	AC	AC	AC	AC	AC	AC	AC	AC	AC	AC	AC	AC	AC	AC	AC
691317	C/A	Unknown	56687936	+	CC	CA	CA	CA	CC	CC	CA	CA	CA	CA	CA	CC	CA	CA	CC	CC	CA	CA	CA	CA	CA	CA	CA	CA	CA	CA	CA	CA	CA	CA	CA	CC	CC	CA	CA	CA	CA	CC	CA	CA	CA	CC	CA	CA	CA
691360	C/G	Unknown	56691472	+	CC	CC	CC	CG	CC	CC	CC	CG	CC	CC	CC	CC	CC	CC	CC	CC	CC	CC	CC	CG	CC	CC	CC	CC	CC	CC	CC	CG	CC	CC	CG	CC	CC	CC	CC	CC	CC	CC	CC	CC	CC	CC	CG	CC	CC
691373	G/C	Unknown	56692536	+	GC	GC	GC	GC	GC	GC	GG	GC	GC	GC	GC	GC	GC	GC	GC	GC	GC	GC	GC	GC	GC	GC	GC	GC	GG	GC	GG	GC	GC	GC	GG	GC	GC	GC	GC	GC	GC	GC	GC	GC	GG	GC	GC	GC	GC
691568	G/A	Unknown	56708521	+	GG	GG	GG	GG	GG	GG	GG	GG	GA	GG	GG	GG	GG	GG	GG	GG	GG	GG	GG	GG	GG	GG	GG	GG	GG	GG	GG	GG	GG	GG	GA	GG	GG	GG	GG	GG	GA	GG	GG	GG	GG	GG	GG	GG	GG
691568	C/T	Unknown	56708541	+	CT	CC	CT	CT	CC	CT	CT	CC	CC	CT	CT	CC	CC	CT	CT	CT	CC	CT	CT	CT	CT	CC	CC	CT	CC	CT	CC	CC	CT	CC	CC	CC	CT	CT	CC	CT	CT	CT	CT	CC	CC	CC	CT	CT	CT
691991	G/A	Unknown	56743199	+	GG	GA	GG	GG	GG	GG	GG	GG	GG	GG	GG	GG	GA	GG	GG	GG	GG	GG	GG	GG	GG	GG	GG	GG	GG	GG	GG	GG	GG	GG	GG	GA	GG	GG	GA	GG	GG	GG	GG	GG	GG	GG	GG	GG	GA
692103	G/C	Unknown	56752394	+	GC	GG	GG	GG	GG	GG	GG	GG	GG	GG	GC	GG	GG	GG	GG	GG	GG	GG	GG	GG	GG	GG	GG	GG	GG	GG	GG	GG	GG	GG	GG	GC	GG	GG	GG	GG	GG	GG	GG	GG	GG	GG	GG	GG	GG
692189	C/G	Unknown	56759445	+	CC	CC	CC	CC	CC	CG	CC	CC	CC	CC	CC	CC	CC	CC	CG	CC	CC	CG	CC	CG	CC	CC	CC	CC	CG	CC	CC	CC	CC	CG	CC	CC	CG	CC	CC	CC	CC	CG	CC	CC	CG	CC	CC	CC	CC
693156	G/T	Unknown	56838726	+	GG	GG	GG	GG	GG	GG	GG	GG	GT	GG	GG	GG	GG	GG	GG	GG	GG	GG	GG	GG	GG	GG	GG	GT	GG	GG	GG	GG	GG	GT	GT	GG	GG	GG	GG	GG	GG	GG	GG	GG	GG	GG	GG	GG	GG
693156	C/T	Unknown	56838734	+	CC	CC	CC	CC	CC	CC	CC	CC	CC	CC	CC	CC	CC	CC	CC	CC	CC	CC	CC	CC	CC	CC	CC	CT	CC	CC	CC	CC	CC	CT	CT	CC	CC	CC	CC	CC	CC	CC	CC	CC	CC	CC	CC	CC	CC
693286	C/T	Unknown	56849388	+	CC	CC	CC	CC	CC	CC	CC	CC	CC	CC	CC	CC	CC	CC	CC	CC	CC	CC	CC	CC	CC	CC	CC	CC	CC	CC	CC	CC	CC	CC	CC	CC	CC	CC	CC	CC	CC	CC	CC	CC	CC	CC	CC	CC	CC
693286	T/C	Unknown	56849407	+	TT	TT	TT	TT	TT	TT	TT	TC	TC	TT	TT	TT	TT	TT	TT	TT	TT	TT	TT	TT	TT	TT	TT	TT	TT	TT	TT	TT	TT	TT	TT	TT	TT	TT	TT	TT	TT	TT	TT	TT	TT	TT	TT	TT	TT
693364	G/C	Unknown	56855816	+	GG	GG	GG	GG	GG	GG	GC	GG	GG	GG	GG	GG	GG	GG	GG	GG	GG	GC	GG	GG	GG	GG	GG	GG	GG	GG	GG	GG	GG	GG	GG	GG	GG	GG	GG	GG	GG	GG	GG	GG	GG	GG	GG	GG	GG
693650	T/G	Unknown	56879252	+	TT	TT	TT	TT	TT	TG	TT	TT	TT	TT	TT	TT	TT	TT	TT	TT	TT	TT	TT	TT	TT	TT	TT	TT	TT	TT	TT	TT	TT	TT	TT	TT	TT	TT	TT	TT	TT	TT	TT	TT	TT	TT	TT	TT	TT
694019	G/A	Unknown	56909491	+	GG	GG	GG	GG	GG	GG	GG	GG	GG	GG	GG	GG	GG	GG	GG	GG	GG	GG	GG	GG	GG	GG	GG	GG	GA	GG	GG	GG	GG	GG	GG	GA	GG	GA	GG	GG	GG	GG	GG	GG	GG	GG	GG	GG	GA
694909	C/A	Unknown	56982490	+	CC	CA	CC	CC	CC	CA	CC	CC	CC	CC	CC	CC	CC	CC	CC	CA	CC	CC	CC	CC	CC	CC	CA	CC	CC	CC	CC	CC	CC	CC	CC	CA	CC	CC	CA	CC	CC	CC	CC	CC	CC	CC	CC	CC	CC
696623	C/G	Unknown	57123048	+	CC	CC	CC	CC	CC	CG	CC	CG	CC	CG	CC	CC	CC	CC	CC	CC	CC	CG	CC	CC	CC	CG	CC	CG	CC	CC	CC	CC	CC	CG	CC	CC	CG	CC	CC	CC	CC	CC	CC	CC	CC	CG	CC	CG	CC
696737	C/G	Unknown	57132368	+	CG	CC	CC	CC	CG	CG	CC	CG	CG	CC	CC	CG	CC	CC	CG	CC	CC	CG	CG	CG	CC	CG	CG	CG	CC	CG	CC	CC	CC	CC	CC	CG	CG	CG	CG	CG	CG	CG	CG	CG	CC	CC	CC	CG	CC
696737	G/C	Unknown	57132371	+	GC	GG	GG	GG	GC	GC	GG	GC	GC	GG	GG	GC	GG	GC	GC	GG	GG	GC	GC	GC	GG	GC	GC	GC	GG	GC	GC	GC	GG	GG	GG	GC	GC	GC	GC	GC	GC	GC	GC	GC	GG	GG	GG	GC	GG
696737	G/C	Unknown	57132383	+	GG	GC	GG	GC	GG	GG	GG	GG	GG	GC	GC	GC	GG	GG	GG	GC	GG	GG	GG	GG	GG	GC	GC	GC	GC	GG	GG	GG	GC	GC	GC	GG	GG	GC	GG	GG	GG	GG	GG	GG	GG	GC	GC	GG	GC
696737	G/T	Unknown	57132385	+	GG	GT	GG	GT	GG	GG	GG	GG	GG	GT	GT	GT	GG	GG	GG	GT	GG	GG	GG	GG	GG	GT	GT	GT	GT	GG	GG	GG	GT	GT	GT	GG	GG	GT	GG	GG	GG	GG	GG	GG	GG	GT	GT	GG	GT
696955	A/C	Unknown	57150245	+	AA	AA	AA	AC	AC	AA	AA	AA	AC	AA	AA	AA	AA	AA	AA	AA	AA	AA	AA	AA	AA	AA	AC	AA	AC	AA	AC	AA	AA	AA	AA	AA	AA	AA	AA	AA	AA	AA	AA	AA	AA	AA	AA	AA	AA
697264	G/A	Unknown	57175601	+	GG	GG	GG	GG	GG	GG	GG	GG	GG	GG	GG	GG	GG	GG	GG	GG	GG	GG	GG	GG	GG	GG	GG	GG	GG	GG	GG	GA	GG	GG	GG	GG	GG	GG	GG	GG	GG	GG	GG	GG	GG	GG	GG	GG	GG
697713	C/T	Unknown	57212415	+	CC	CC	CC	CC	CC	CC	CC	CC	CC	CC	CC	CC	CC	CC	CC	CC	CC	CC	CC	CC	CC	CC	CC	CC	CC	CC	CC	CC	CC	CT	CT	CC	CC	CC	CC	CC	CC	CT	CC	CC	CC	CC	CC	CC	CC
697883	G/A	Unknown	57226353	+	GG	GG	GG	GG	GG	GG	GG	GG	GG	GG	GG	GG	GG	GG	GG	GG	GG	GG	GG	GG	GG	GG	GG	GG	GG	GG	GG	GG	GA	GG	GG	GG	GG	GG	GG	GG	GG	GG	GG	GA	GG	GG	GG	GG	GG
697989	T/C	Unknown	57235043	+	TC	TC	TC	TC	TC	TC	TC	TC	TC	TC	TC	TC	TC	TC	TC	TC	TC	TC	TC	TC	TC	TC	TC	TC	TC	TC	TC	TC	TC	TC	TC	TC	TC	TC	TC	TC	TC	TC	TC	TC	TC	TC	TC	TC	TC
698240	C/T	Unknown	57255625	+	CC	CC	CC	CC	CC	CT	CC	CC	CC	CC	CC	CC	CC	CC	CC	CC	CC	CC	CC	CC	CC	CC	CC	CC	CC	CC	CC	CC	CT	CC	CT	CT	CC	CC	CC	CC	CC	CC	CT	CC	CC	CC	CC	CC	CC
698304	G/A	Unknown	57260886	+	GG	GG	GG	GG	GA	GG	GA	GG	GG	GG	GG	GA	GG	GG	GG	GG	GG	GG	GG	GG	GG	GA	GA	GA	GG	GA	GA	GG	GG	GG	GG	GG	GG	GA	GG	GG	GG	GA	GG	GG	GA	GG	GG	GG	GA
698460	C/A	Unknown	57273649	+	CA	CC	CA	CA	CC	CA	CA	CA	CA	CA	CA	CA	CA	CA	CA	CA	CC	CA	CC	CA	CA	CA	CA	CA	CA	CC	CA	CA	CA	CA	CC	CC	CA	CA	CA	CA	CC	CA	CA	CA	CA	CC	CA	CA	CA
698460	C/T	Unknown	57273679	+	CC	CT	CC	CC	CT	CC	CC	CT	CC	CC	CC	CC	CC	CC	CT	CC	CT	CC	CC	CC	CT	CC	CC	CC	CC	CC	CC	CC	CC	CC	CC	CT	CC	CC	CC	CT	CC	CT	CC	CC	CC	CT	CC	CC	CT
699007	C/T	Unknown	57318515	+	CC	CC	CC	CC	CC	CC	CC	CC	CC	CC	CC	CC	CC	CC	CC	CC	CC	CC	CC	CC	CC	CC	CC	CC	CT	CC	CC	CC	CC	CC	CC	CT	CC	CC	CC	CC	CC	CC	CC	CC	CC	CC	CC	CC	CC
699159	G/A	Unknown	57331001	+	GG	GG	GG	GG	GG	GA	GG	GG	GA	GG	GG	GG	GG	GG	GG	GG	GG	GG	GG	GA	GG	GG	GA	GG	GG	GG	GA	GG	GG	GG	GG	GG	GG	GA	GG	GG	GG	GA	GG	GG	GG	GG	GG	GG	GG
699412	G/C	Unknown	57351751	+	GG	GG	GG	GG	GG	GG	GG	GG	GC	GG	GG	GG	GG	GG	GG	GG	GG	GC	GG	GG	GG	GG	GC	GG	GG	GG	GG	GG	GG	GG	GG	GG	GG	GG	GC	GG	GG	GG	GG	GG	GC	GG	GG	GG	GG
699559	C/T	Unknown	57363762	+	CC	CC	CC	CC	CC	CC	CC	CT	CT	CC	CC	CC	CC	CC	CC	CC	CC	CC	CC	CC	CC	CC	CC	CC	CC	CC	CC	CC	CC	CC	CC	CC	CC	CC	CC	CC	CC	CC	CT	CC	CC	CC	CC	CC	CC
699896	G/A	Unknown	57391406	+	GA	GA	GA	GG	GA	GA	GA	GA	GA	GA	AA	GA	GA	GA	GA	GA	GA	GA	GA	GA	GA	GA	GA	GA	GA	GA	GG	GA	GA	GA	GA	GA	GA	GA	GA	GA	GA	GA	GA	GA	GA	GA	GA	GA	GA
699896	G/C	Unknown	57391429	+	GC	GC	GC	GC	GC	GC	GC	GG	GC	GC	GG	GC	GC	GC	GC	GG	GC	GG	GC	GC	GC	GC	GC	GC	GG	GC	GC	GC	GC	GC	GC	GC	GG	GC	GC	GC	GC	GG	GC	GC	GC	GC	GC	GC	GC
700256	T/C	Unknown	57420954	+	TC	TT	TC	TC	TT	TT	TC	TC	TC	TC	TC	TC	TC	TC	TC	TC	TC	TC	TC	TC	TC	TT	TC	TT	TC	TC	TT	TC	TC	TC	TC	TC	TC	TC	TT	TT	TT	TC	TT	TC	TC	TC	TC	TC	TC
700726	G/A	Unknown	57459463	+	GG	GG	GG	GG	GG	GG	GG	GA	GG	GG	GG	GG	GA	GG	GG	GG	GG	GG	GG	GG	GG	GG	GG	GA	GA	GG	GG	GG	GG	GG	GG	GG	GG	GG	GG	GA	GG	GA	GG	GG	GA	GG	GG	GG	GG
700994	C/T	Unknown	57481443	+	CC	CC	CC	CC	CT	CC	CC	CC	CC	CC	CC	CC	CC	CC	CC	CC	CC	CC	CC	CC	CC	CC	CC	CT	CC	CC	CC	CC	CC	CT	CC	CC	CC	CC	CC	CC	CC	CC	CC	CC	CT	CC	CC	CC	CC
701009	G/C	Unknown	57482670	+	GG	GG	GG	GG	GG	GG	GG	GG	GG	GG	GG	GG	GG	GG	GG	GG	GG	GG	GG	GG	GG	GG	GG	GG	GG	GG	GG	GG	GG	GG	GC	GG	GG	GC	GG	GG	GG	GG	GG	GG	GG	GG	GG	GG	GG
701355	A/G	Unknown	57511042	+	AA	AA	AA	AA	AA	AG	AA	AA	AA	AA	AA	AA	AA	AA	AA	AA	AA	AA	AA	AA	AA	AA	AG	AA	AA	AA	AA	AA	AA	AA	AG	AA	AA	AA	AA	AA	AA	AA	AA	AA	AA	AA	AG	AA	AA
701421	C/T	Unknown	57516483	+	CC	CC	CC	CC	CC	CC	CC	CC	CC	CC	CC	CT	CC	CC	CC	CC	CC	CC	CC	CC	CC	CC	CT	CC	CC	CC	CC	CC	CC	CC	CC	CC	CC	CT	CC	CC	CC	CC	CC	CC	CC	CC	CC	CC	CC
701691	G/A	Unknown	57538595	+	GA	GG	GG	GG	GG	GG	GG	GG	GG	GG	GG	GG	GG	GG	GA	GG	GG	GG	GG	GG	GG	GG	GG	GG	GA	GA	GG	GG	GG	GG	GG	GG	GG	GG	GG	GG	GG	GG	GG	GG	GA	GG	GG	GG	GG
702193	G/A	Unknown	57579756	+	GA	GA	GA	GA	GA	GA	GA	GA	GA	GA	GA	GG	GA	GG	GA	GA	GA	GG	GA	GA	GA	GA	GG	GA	GG	GA	GA	GG	GA	GA	GA	GA	GA	GA	GA	GA	GA	GA	GA	GG	GA	GA	GA	GA	GG
702238	G/A	Unknown	57583441	+	GG	GG	GG	GA	GG	GG	GG	GA	GG	GG	GG	GG	GG	GG	GG	GG	GG	GG	GG	GG	GG	GG	GG	GA	GG	GA	GG	GG	GG	GG	GA	GG	GG	GG	GG	GG	GA	GA	GG	GG	GA	GA	GG	GG	GG
702334	G/A	Unknown	57591334	+	GG	GG	GG	GG	GG	GG	GG	GG	GG	GG	GG	GG	GG	GG	GG	GG	GG	GG	GG	GG	GG	GG	GG	GG	GG	GG	GG	GG	GG	GG	GG	GG	GG	GG	GG	GG	GG	GG	GG	GG	GG	GG	GA	GG	GG
702497	A/C	Unknown	57604703	+	AA	AA	AA	AA	AA	AA	AA	AA	AA	AA	AC	AA	AA	AA	AA	AA	AC	AA	AA	AA	AA	AA	AA	AA	AA	AA	AC	AC	AA	AA	AA	AA	AA	AA	AA	AA	AA	AA	AA	AA	AA	AA	AA	AA	AA
702612	A/C	Unknown	57614141	+	AA	AA	AA	AA	AA	AA	AC	AA	AA	AA	AA	AC	AA	AA	AA	AA	AA	AA	AA	AA	AA	AA	AA	AA	AA	AA	AA	AA	AA	AA	AA	AA	AA	AA	AA	AA	AA	AA	AA	AA	AA	AA	AA	AA	AA
702766	C/T	Unknown	57626759	+	CC	CT	CC	CC	CC	CC	CT	CC	CC	CC	CC	CC	CT	CC	CC	CT	CC	CT	CC	CC	CC	CC	CT	CC	CC	CC	CC	CC	CC	CC	CC	CC	CC	CC	CC	CC	CC	CC	CC	CC	CT	CC	CC	CC	CC
702893	A/G	Unknown	57637184	+	AG	AG	AA	AG	AA	AG	AG	AG	AG	AG	AG	AG	AG	AG	AG	AG	AG	AG	AG	AG	AG	AG	AG	AG	AG	AG	AG	AG	AG	AG	AG	AG	AG	AG	AG	AG	AG	AG	AG	AG	AG	AG	AG	AG	AG
702893	A/G	Unknown	57637189	+	AG	AG	AA	AG	AA	AG	AG	AG	AG	AG	AG	AG	AG	AG	AG	AG	AG	AG	AG	AG	AG	AG	AG	AG	AG	AG	AG	AG	AG	AG	AG	AG	AG	AG	AG	AG	AG	AG	AG	AG	AG	AG	AG	AG	AG
703036	G/A	Unknown	57648886	+	GG	GG	GG	GG	GG	GG	GG	GG	GG	GG	GG	GG	GG	GG	GG	GG	GG	GG	GG	GG	GG	GA	GG	GG	GG	GG	GG	GG	GG	GG	GG	GG	GG	GG	GG	GG	GG	GG	GG	GG	GG	GG	GG	GG	GG
703324	C/T	Unknown	57672505	+	CC	CC	CC	CC	CC	CT	CC	CC	CC	CC	CC	CT	CC	CC	CC	CC	CC	CC	CC	CC	CC	CC	CT	CC	CC	CC	CC	CC	CC	CC	CC	CC	CC	CC	CC	CC	CT	CC	CC	CC	CC	CC	CC	CC	CC
703664	G/A	Unknown	57700441	+	GG	GG	GG	GG	GA	GG	GG	GG	GA	GG	GG	GG	GG	GG	GG	GG	GG	GG	GG	GG	GG	GG	GG	GG	GG	GG	GG	GG	GG	GG	GG	GG	GG	GG	GG	GG	GG	GG	GA	GG	GG	GG	GG	GG	GG
704133	G/T	Unknown	57738865	+	GG	GG	GG	GG	GG	GG	GG	GT	GG	GG	GG	GG	GT	GG	GT	GG	GG	GG	GG	GG	GG	GG	GG	GT	GG	GG	GG	GG	GG	GG	GG	GG	GG	GG	GG	GG	GG	GG	GG	GG	GG	GG	GG	GG	GG
704219	G/A	Unknown	57745888	+	GG	GG	GG	GG	GG	GG	GG	GG	GA	GG	GG	GG	GG	GA	GG	GG	GG	GG	GG	GG	GG	GA	GG	GA	GG	GG	GG	GG	GG	GG	GG	GG	GG	GG	GG	GG	GG	GG	GA	GG	GG	GG	GG	GG	GG
704219	G/C	Unknown	57745917	+	GG	GG	GG	GG	GG	GG	GG	GG	GG	GC	GG	GG	GC	GG	GG	GG	GG	GG	GG	GG	GG	GG	GG	GG	GG	GG	GG	GG	GG	GG	GG	GG	GG	GC	GG	GG	GG	GG	GG	GG	GG	GG	GG	GG	GG
704323	G/A	Unknown	57754440	+	GG	GG	GG	GA	GA	GG	GG	GA	GG	GA	GA	GG	GG	GA	GG	GG	GA	GG	GG	GA	GA	GA	GA	GA	GG	GG	GA	GA	GA	GG	GG	GG	GA	GG	GG	GG	GG	GG	GA	GA	GG	GG	GA	GG	GG
704510	A/G	Unknown	57769746	+	AG	AG	AG	AG	AG	AA	AG	AG	AG	AG	AG	AG	AG	AG	AG	AG	AG	AG	AG	AG	AG	AG	AG	AG	AG	AG	AG	AG	AG	AG	AG	AG	AG	AG	AG	AG	AG	AG	AG	AG	AG	AG	AG	AG	AG
704510	C/G	Unknown	57769748	+	CG	CG	CG	CG	CG	CG	CG	CG	CG	CG	CG	CG	CC	CC	CG	CG	CG	CG	CG	CG	CG	CG	CG	CG	CG	CG	CG	CG	CG	CC	CG	CG	CG	CG	CG	CG	CG	CG	CG	CG	CG	CG	CG	CG	CG
704861	G/A	Unknown	57798531	+	GG	GG	GG	GG	GG	GG	GG	GA	GA	GG	GG	GA	GG	GG	GG	GG	GG	GA	GG	GG	GG	GG	GA	GA	GG	GG	GG	GG	GG	GA	GG	GG	GG	GG	GG	GG	GG	GG	GG	GG	GG	GG	GG	GG	GA
704861	C/T	Unknown	57798549	+	CC	CT	CC	CC	CC	CC	CT	CC	CC	CC	CC	CC	CC	CC	CT	CC	CC	CC	CC	CC	CC	CC	CC	CC	CC	CC	CC	CT	CT	CC	CC	CC	CC	CC	CC	CC	CC	CT	CC	CC	CC	CC	CC	CC	CC
705241	T/C	Unknown	57829717	+	TT	TT	TT	TT	TT	TT	TT	TT	TT	TT	TT	TT	TT	TT	TT	TT	TT	TT	TT	TT	TT	TT	TT	TC	TT	TT	TT	TT	TT	TT	TT	TT	TT	TC	TT	TT	TT	TT	TT	TT	TT	TT	TT	TT	TT
705428	G/T	Unknown	57845037	+	GG	GG	GG	GG	GG	GG	GG	GG	GG	GG	GG	GG	GG	GG	GG	GG	GG	GG	GG	GG	GG	GG	GG	GG	GT	GG	GG	GG	GT	GG	GG	GG	GG	GG	GT	GG	GG	GG	GG	GG	GG	GG	GG	GG	GG
706159	G/A	Unknown	57904987	+	GG	GG	GA	GG	GG	GG	GA	GG	GG	GG	GG	GA	GA	GG	GG	GA	GG	GA	GA	GA	GA	GG	GG	GG	GG	GA	GG	GG	GA	GA	GG	GA	GG	GG	GA	GA	GA	GG	GG	GA	GA	GG	GA	GA	GA
706317	G/T	Unknown	57917953	+	GG	GG	GG	GG	GG	GG	GG	GG	GG	GG	GG	GG	GG	GG	GG	GG	GT	GG	GG	GG	GG	GG	GG	GT	GG	GG	GG	GG	GG	GG	GG	GG	GG	GG	GG	GG	GG	GG	GG	GG	GT	GG	GT	GG	GG
706819	G/T	Unknown	57959105	+	GG	GG	GG	GG	GG	GG	GG	GG	GG	GG	GG	GG	GG	GG	GG	GG	GG	GG	GG	GG	GG	GG	GG	GG	GG	GG	GG	GT	GG	GG	GG	GG	GG	GG	GG	GG	GG	GG	GG	GG	GG	GG	GG	GG	GG
707637	C/T	Unknown	58026165	+	CT	CT	CT	CT	CT	CT	CT	CT	CT	CT	CT	CT	CT	CT	CT	CT	CT	CT	CT	CT	CT	CT	CT	CT	CT	CT	CT	CT	CT	CT	CT	CT	CT	CT	CT	CT	CT	CC	CT	CT	CT	CT	CC	CT	CT
707637	G/C	Unknown	58026190	+	GC	GC	GC	GC	GC	GC	GC	GC	GC	GC	GC	GC	GC	GC	GC	GC	GC	GC	GC	GC	GC	GC	GC	GC	GC	GC	GC	GC	GC	GC	GC	GC	GC	GC	GC	GC	GC	GG	GC	GC	GC	GC	GG	GC	GC
707881	T/C	Unknown	58046168	+	TC	TC	TC	TC	TC	TC	TC	TC	TC	TC	TC	TC	TC	TC	TC	TC	TC	TC	TC	TC	TC	TC	TC	TC	TC	TC	TC	TC	TC	TC	TC	TC	TC	TC	TC	TC	TC	TC	TC	TC	TC	TC	TC	TC	TC
708280	G/A	Unknown	58078926	+	GA	GG	GG	GG	GG	GG	GG	GG	GG	GG	GG	GG	GG	GG	GG	GG	GG	GG	GG	GG	GG	GG	GG	GG	GG	GG	GG	GG	GG	GG	GG	GG	GG	GA	GG	GG	GG	GG	GG	GG	GG	GA	GG	GG	GG
708593	C/T	Unknown	58104555	+	CT	CT	CT	CT	CT	CT	CT	CT	CT	CT	CT	CT	CT	CT	CT	CT	CT	CT	CT	CT	CT	CT	CT	CT	CT	CT	CT	CT	CT	CT	CT	CT	CT	CT	CT	CT	CT	CT	CT	CT	CT	CT	CT	CT	CT
708652	T/C	Unknown	58109415	+	TT	TT	TT	TT	TT	TT	TT	TT	TT	TT	TT	TT	TT	TT	TT	TT	TT	TT	TT	TT	TT	TT	TT	TT	TT	TT	TC	TT	TT	TT	TT	TT	TT	TT	TT	TT	TT	TT	TT	TT	TT	TT	TT	TT	TT
708808	C/T	Unknown	58122186	+	CT	CC	CC	CC	CC	CC	CT	CC	CC	CC	CC	CC	CC	CC	CT	CC	CC	CC	CC	CC	CT	CT	CT	CC	CC	CC	CT	CC	CC	CC	CT	CC	CT	CC	CC	CC	CC	CT	CC	CC	CC	CT	CC	CC	CT
708941	C/T	Unknown	58133129	+	CC	CC	CC	CC	CC	CC	CT	CC	CT	CC	CC	CC	CC	CC	CC	CT	CC	CC	CC	CC	CC	CC	CT	CT	CC	CC	CC	CC	CC	CT	CC	CT	CC	CC	CC	CC	CC	CC	CT	CT	CC	CT	CT	CC	CC
709042	C/T	Unknown	58141373	+	CC	CC	CC	CC	CC	CC	CC	CT	CC	CC	CC	CC	CC	CC	CC	CC	CC	CC	CC	CC	CC	CC	CC	CC	CC	CC	CC	CT	CC	CC	CC	CC	CC	CC	CC	CC	CC	CC	CT	CC	CC	CC	CC	CC	CT
709042	G/A	Unknown	58141381	+	GG	GG	GG	GG	GG	GA	GG	GA	GA	GG	GG	GG	GG	GG	GG	GG	GG	GG	GG	GG	GG	GG	GG	GG	GG	GG	GA	GG	GG	GG	GA	GG	GG	GA	GG	GG	GG	GG	GG	GG	GG	GA	GG	GG	GG
709042	G/A	Unknown	58141388	+	GG	GG	GG	GG	GG	GG	GG	GG	GA	GG	GG	GG	GG	GG	GG	GG	GG	GG	GG	GG	GG	GG	GG	GG	GG	GG	GA	GG	GG	GG	GG	GG	GG	GA	GG	GG	GG	GG	GG	GG	GG	GG	GG	GG	GG
709241	G/C	Unknown	58157739	+	GG	GG	GG	GG	GG	GG	GC	GG	GG	GG	GG	GG	GG	GG	GG	GG	GG	GG	GG	GG	GG	GG	GG	GG	GG	GG	GG	GG	GG	GG	GG	GG	GG	GG	GG	GG	GG	GC	GG	GG	GG	GG	GG	GG	GG
709714	C/T	Unknown	58196504	+	CT	CT	CT	CT	CT	CT	CT	CT	CT	CT	CC	CT	CT	CT	CT	CT	CT	CT	CT	CT	CT	CT	CT	CT	CT	CT	CT	CT	CT	CT	CT	CT	CT	CT	CC	CT	CT	CT	CT	CT	CT	CT	CT	CT	CT
710483	T/A	Unknown	58259596	+	TT	TT	TT	TT	TT	TT	TT	TT	TT	TT	TT	TA	TA	TT	TT	TT	TT	TT	TT	TT	TT	TT	TA	TT	TT	TT	TT	TT	TT	TT	TT	TT	TT	TT	TT	TT	TT	TT	TA	TA	TT	TT	TT	TT	TT
710749	C/G	Unknown	58281348	+	CG	CG	CG	CG	CG	CG	CG	CG	CG	CG	CG	CG	CG	CG	CC	CG	CG	CG	CG	CG	CG	CG	CG	CC	CC	CG	CG	CG	CG	CG	CG	CG	CG	CG	CG	CG	CG	CG	CG	CG	CG	CG	CC	CG	CG
711907	C/T	Unknown	58376304	+	CC	CC	CC	CC	CC	CC	CC	CC	CC	CC	CC	CC	CC	CC	CC	CC	CC	CC	CC	CC	CT	CC	CC	CC	CC	CT	CT	CC	CC	CC	CC	CC	CC	CC	CC	CC	CC	CC	CT	CT	CC	CT	CC	CC	CC
712925	C/T	Unknown	58459777	+	CC	CC	CC	CC	CC	CC	CC	CC	CT	CC	CC	CC	CC	CC	CT	CC	CC	CC	CC	CT	CC	CC	CC	CC	CC	CC	CC	CT	CC	CC	CT	CC	CC	CC	CC	CC	CC	CC	CC	CT	CC	CC	CC	CC	CC
713455	G/C	Unknown	58503239	+	GG	GG	GC	GC	GG	GG	GC	GC	GC	GC	GG	GG	GG	GG	GC	GG	GC	GC	GC	GC	GC	GC	GG	GC	GG	GC	GG	GG	GC	GG	GG	GC	GC	GG	GG	GG	GC	GG	GG	GC	GG	GG	GG	GC	GC
713679	A/C	Unknown	58521622	+	AA	AC	AA	AC	AA	AA	AA	AA	AA	AA	AA	AA	AC	AA	AC	AA	AA	AA	AA	AA	AA	AA	AA	AA	AA	AA	AC	AA	AA	AA	AA	AA	AA	AC	AC	AA	AA	AA	AA	AA	AA	AA	AA	AA	AA
713691	C/A	Unknown	58522591	+	CC	CC	CA	CA	CA	CA	CC	CA	CA	CC	CA	CA	CA	CA	CC	CC	CA	CC	CA	CA	CA	CC	CC	CA	CC	CA	CC	CA	CC	CC	CA	CC	CA	CC	CC	CA	CA	CC	CC	CC	CA	CC	CA	CA	CC
713691	C/G	Unknown	58522606	+	CC	CC	CG	CG	CG	CG	CC	CG	CG	CC	CG	CG	CG	CG	CC	CC	CG	CC	CG	CG	CG	CC	CC	CG	CC	CG	CC	CG	CC	CC	CG	CC	CG	CC	CC	CG	CG	CC	CC	CC	CG	CC	CG	CG	CC
714337	G/A	Unknown	58575589	+	GA	GA	GA	GA	GA	GA	GA	GA	GA	GA	GA	GA	GA	GA	GA	GA	GA	GA	GA	GA	GA	GA	GA	GA	GA	GA	GA	GA	GA	GA	GA	GA	GA	GA	GA	GA	GA	GA	GA	GG	GA	GA	GA	GG	GA
714382	G/A	Unknown	58579301	+	GA	GA	GA	GA	GA	GA	GA	GG	GA	GA	GA	GA	GA	GA	GA	GG	GA	GA	GA	GA	GA	GA	GG	GA	AA	GA	GA	GA	GA	GA	GA	GA	GA	GA	GA	GA	GA	GG	GG	GA	GA	GG	GA	GA	GA
714570	G/A	Unknown	58594665	+	GG	GG	GG	GG	GG	GA	GG	GG	GG	GG	GG	GG	GG	GG	GG	GG	GG	GG	GG	GG	GG	GG	GG	GG	GA	GG	GG	GG	GG	GG	GG	GG	GG	GG	GG	GG	GG	GG	GG	GG	GG	GA	GG	GG	GG
715421	G/A	Unknown	58664471	+	GG	GA	GG	GG	GG	GA	GG	GG	GG	GG	GG	GG	GG	GG	GG	GG	GG	GG	GG	GG	GG	GG	GG	GG	GG	GG	GG	GG	GG	GG	GG	GG	GG	GG	GG	GG	GG	GG	GG	GG	GG	GA	GG	GG	GG
715484	G/C	Unknown	58669635	+	GG	GC	GG	GG	GG	GG	GG	GG	GG	GG	GG	GG	GG	GG	GG	GG	GG	GG	GG	GG	GG	GG	GG	GG	GG	GG	GG	GC	GG	GG	GG	GG	GG	GG	GG	GG	GG	GG	GG	GG	GG	GG	GG	GG	GG
715484	G/T	Unknown	58669650	+	GG	GT	GG	GG	GG	GG	GG	GG	GG	GG	GG	GG	GG	GG	GG	GG	GG	GG	GG	GG	GG	GG	GG	GG	GG	GG	GG	GT	GG	GG	GG	GG	GG	GG	GG	GG	GG	GG	GG	GG	GG	GG	GG	GG	GG
715631	C/T	Unknown	58681669	+	CC	CC	CC	CC	CC	CC	CC	CC	CC	CC	CC	CC	CC	CC	CC	CC	CC	CC	CC	CC	CC	CC	CC	CC	CC	CC	CC	CC	CC	CC	CC	CC	CC	CC	CC	CC	CC	CC	CC	CC	CC	CC	CC	CC	CC
715631	G/A	Unknown	58681677	+	GG	GG	GG	GG	GG	GG	GG	GG	GG	GG	GG	GG	GG	GG	GG	GG	GG	GG	GG	GG	GG	GG	GA	GA	GG	GG	GG	GG	GG	GG	GG	GG	GG	GG	GG	GG	GG	GG	GA	GG	GG	GG	GA	GG	GG
715638	C/T	Unknown	58682248	+	CC	CC	CC	CC	CC	CC	CC	CC	CC	CC	CC	CC	CC	CC	CC	CC	CC	CC	CC	CC	CC	CT	CT	CC	CC	CC	CC	CC	CC	CC	CC	CC	CC	CC	CC	CC	CC	CC	CT	CT	CC	CC	CC	CC	CC
716435	C/T	Unknown	58747608	+	CT	CT	CT	CT	CT	CT	CT	CT	CT	CT	CT	CT	CC	CT	CT	CT	CT	CT	CT	CT	CT	CT	CT	CT	CT	CT	CT	CT	CT	CT	CT	CT	CT	CT	CT	CT	CT	CT	CT	CT	CT	CT	CT	CT	CT
716435	G/T	Unknown	58747612	+	GT	GT	GT	GT	GT	GT	GT	GT	GT	GT	GT	GT	GG	GT	GT	GT	GT	GT	GT	GT	GT	GT	GT	GT	GT	GT	GT	GT	GT	GT	GT	GT	GT	GT	GT	GT	GT	GT	GT	GT	GT	GT	GT	GT	GT
717080	C/A	Unknown	58800484	+	CA	CC	CC	CC	CC	CC	CC	CC	CC	CC	CC	CC	CA	CC	CA	CC	CC	CC	CC	CC	CC	CC	CA	CC	CC	CC	CC	CC	CC	CA	CC	CC	CC	CC	CC	CC	CC	CC	CA	CC	CC	CC	CC	CC	CC
717173	C/T	Unknown	58808149	+	CC	CC	CC	CC	CC	CC	CC	CT	CC	CC	CC	CC	CT	CC	CT	CC	CC	CC	CC	CC	CT	CC	CT	CC	CC	CT	CC	CC	CC	CC	CT	CC	CC	CC	CC	CC	CC	CC	CT	CC	CC	CC	CC	CC	CC
717283	C/G	Unknown	58817168	+	CC	CC	CC	CC	CC	CC	CG	CG	CC	CG	CC	CC	CC	CC	CC	CC	CG	CC	CC	CC	CC	CC	CC	CC	CC	CG	CC	CC	CC	CC	CG	CC	CC	CC	CC	CC	CC	CC	CC	CC	CG	CC	CC	CC	CC
717761	G/A	Unknown	58856343	+	GA	GG	GG	GA	GA	GG	GG	GG	GA	GG	GG	GG	GG	GG	GG	GG	GG	GG	GG	GG	GG	GG	GG	GG	GG	GG	GG	GG	GG	GG	GG	GG	GG	GA	GG	GG	GG	GG	GG	GG	GG	GA	GG	GG	GG
719089	G/A	Unknown	58965256	+	GA	GA	GG	GG	GG	GA	GG	GG	GG	GG	GG	GG	GG	GG	GG	GG	GG	GG	GG	GG	GG	GG	GG	GG	GG	GG	GG	GG	GG	GG	GG	GG	GG	GA	GG	GG	GG	GG	GG	GG	GG	GG	GG	GG	GG
719893	C/A	Unknown	59031156	+	CC	CC	CC	CC	CC	CC	CA	CC	CA	CC	CC	CC	CC	CC	CC	CC	CC	CC	CC	CC	CC	CC	CC	CC	CA	CC	CC	CA	CC	CA	CC	CC	CC	CC	CC	CC	CC	CC	CC	CC	CC	CC	CA	CC	CC
719964	T/C	Unknown	59036997	+	TT	TC	TT	TT	TC	TT	TT	TT	TT	TT	TT	TT	TT	TT	TT	TT	TT	TT	TT	TT	TC	TT	TT	TT	TT	TT	TC	TT	TT	TT	TT	TT	TT	TT	TT	TT	TT	TT	TT	TT	TT	TT	TT	TT	TT
720219	C/T	Unknown	59057916	+	CC	CC	CC	CC	CC	CC	CC	CC	CT	CC	CC	CC	CC	CC	CC	CC	CC	CC	CC	CC	CC	CC	CC	CC	CT	CT	CT	CC	CC	CC	CC	CC	CC	CC	CT	CC	CC	CC	CC	CC	CT	CC	CT	CC	CC
720219	C/T	Unknown	59057926	+	CC	CC	CC	CC	CC	CC	CC	CC	CC	CC	CC	CC	CC	CC	CC	CC	CC	CC	CC	CC	CC	CC	CC	CC	CC	CC	CC	CC	CC	CC	CC	CC	CC	CC	CC	CC	CC	CC	CC	CC	CC	CC	CC	CC	CC
720307	G/A	Unknown	59065143	+	GG	GG	GG	GG	GG	GG	GG	GG	GG	GG	GA	GG	GG	GG	GG	GG	GG	GG	GG	GG	GG	GG	GG	GA	GG	GG	GG	GG	GG	GG	GG	GG	GG	GA	GG	GG	GG	GG	GG	GG	GG	GG	GG	GG	GG
720520	T/G	Unknown	59082579	+	TG	TG	TG	TG	TG	TG	TG	TG	TG	TG	TG	TG	TG	TG	TG	TG	TG	TG	TG	TG	TG	TG	TT	TG	TG	TG	TG	TG	TG	TG	TG	TG	TG	TG	TG	TG	TG	TG	TG	TG	TG	TG	TG	TG	TG
721113	G/C	Unknown	59131221	+	GG	GG	GG	GG	GG	GG	GG	GG	GG	GG	GG	GG	GG	GG	GG	GG	GC	GG	GG	GG	GG	GG	GC	GG	GG	GG	GG	GC	GC	GC	GG	GG	GG	GG	GG	GG	GG	GG	GG	GG	GG	GG	GC	GG	GC
721191	G/A	Unknown	59137603	+	GG	GA	GG	GG	GA	GG	GG	GA	GG	GG	GA	GG	GG	GG	GG	GG	GG	GG	GG	GG	GG	GG	GG	GG	GG	GG	GG	GG	GG	GG	GG	GG	GG	GG	GG	GG	GG	GG	GG	GG	GG	GG	GG	GG	GG
721191	C/T	Unknown	59137621	+	CC	CC	CC	CC	CC	CC	CC	CC	CC	CC	CC	CC	CC	CC	CC	CC	CC	CC	CC	CC	CC	CC	CT	CC	CC	CC	CC	CC	CC	CC	CC	CT	CC	CT	CC	CC	CC	CC	CC	CC	CC	CC	CC	CC	CC
721315	T/C	Unknown	59147757	+	TC	TT	TT	TT	TT	TT	TT	TT	TC	TT	TT	TC	TT	TT	TT	TT	TT	TT	TT	TT	TT	TT	TT	TC	TT	TT	TT	TC	TT	TT	TT	TT	TT	TC	TT	TT	TT	TC	TT	TT	TC	TC	TT	TT	TT
721315	C/T	Unknown	59147779	+	CC	CT	CT	CT	CT	CT	CT	CT	CC	CT	CT	CT	CC	CT	CC	CT	CT	CC	CT	CT	CT	CT	CT	CT	CT	CC	CT	CC	CT	CC	CC	CT	CT	CT	CT	CC	CT	CT	CC	CT	CT	CT	CC	CT	CT
721328	C/G	Unknown	59148851	+	CC	CG	CC	CC	CC	CC	CG	CC	CC	CC	CC	CC	CC	CC	CC	CC	CC	CC	CC	CC	CC	CC	CC	CC	CC	CC	CC	CC	CC	CC	CC	CC	CC	CC	CC	CC	CC	CC	CC	CC	CC	CG	CC	CC	CC
721479	C/T	Unknown	59161215	+	CC	CC	CC	CC	CC	CC	CC	CC	CC	CC	CC	CC	CC	CC	CT	CC	CC	CC	CC	CC	CC	CC	CC	CC	CC	CC	CC	CC	CC	CT	CC	CC	CC	CC	CC	CC	CC	CC	CC	CC	CC	CC	CC	CC	CC
721710	G/A	Unknown	59180173	+	GG	GG	GG	GG	GG	GG	GG	GA	GG	GG	GA	GG	GG	GG	GG	GG	GG	GG	GG	GG	GG	GG	GG	GG	GG	GA	GG	GG	GG	GG	GG	GG	GG	GA	GG	GG	GG	GA	GG	GG	GG	GA	GG	GG	GG
722415	C/G	Unknown	59237988	+	CG	CG	CG	CG	CG	CG	CG	CG	CG	CG	CG	CG	CG	CG	CG	CG	CG	CG	CG	CG	CG	CG	CG	CG	CG	CG	CG	CG	CG	CG	CG	CG	CG	CG	CG	CG	CG	CG	CG	CG	CG	CG	CG	CG	CG
722438	C/T	Unknown	59239860	+	CC	CC	CC	CC	CC	CC	CC	CC	CC	CC	CC	CC	CC	CC	CC	CC	CC	CC	CC	CT	CC	CC	CC	CC	CC	CC	CC	CC	CC	CC	CC	CC	CC	CC	CC	CC	CT	CC	CC	CC	CC	CC	CC	CC	CC
722517	G/A	Unknown	59246359	+	GA	GG	GA	GG	GG	GG	GG	GG	GG	GA	GA	GA	GA	GA	GA	GA	GA	GA	GA	GA	GA	GG	GG	GA	GA	GA	GG	GG	GA	GG	GG	GA	GA	GG	GA	GA	GG	GA	GG	GA	GG	GA	GA	GA	GA
722600	G/A	Unknown	59253160	+	GA	GA	GA	GG	GA	GA	GG	GG	GA	GG	GG	GA	GG	GA	GA	GA	GG	GA	GA	GA	GA	GA	GA	GA	GG	GA	GG	GA	GA	GG	GA	GA	GA	GG	GA	GA	GA	GA	GA	GA	GG	GG	GA	GA	GA
722687	T/G	Unknown	59260261	+	TG	TG	TT	TG	TG	TG	TT	TT	TG	TT	TT	TG	TG	TG	TT	TG	TT	TG	TG	TG	TG	TG	TT	TG	TT	TT	TG	TG	TG	TG	TT	TG	TG	TT	TG	TG	TT	TG	TG	TG	TT	TG	TG	TG	TT
722687	T/C	Unknown	59260276	+	TC	TC	TC	TT	TC	TC	TT	TC	TT	TC	TC	TT	TC	TT	TC	TC	TT	TT	TC	TT	TT	TT	TT	TC	TC	TC	TT	TT	TC	TT	TC	TC	TT	TC	TT	TC	TC	TC	TC	TT	TT	TT	TC	TC	TT
722860	C/A	Unknown	59274476	+	CA	CC	CA	CA	CA	CA	CC	CA	CA	CA	CA	CA	CA	CA	CC	CA	CA	CA	CA	CA	CA	CA	CA	CA	CA	CA	CA	CA	CC	CA	CA	CA	CA	CA	CA	CA	CA	CA	CA	CA	CA	CA	CA	CA	CA
723080	C/T	Unknown	59292497	+	CT	CT	CC	CT	CT	CC	CT	CT	CT	CT	CT	CT	CT	CT	CT	CC	CT	CT	CT	CT	CT	CT	CT	CT	CT	CT	CT	CT	CT	CT	CT	CT	CT	CT	CT	CT	CT	CT	CT	CT	CT	CT	CT	CT	CT
723171	G/A	Unknown	59299969	+	GG	GG	GG	GG	GG	GG	GG	GA	GG	GG	GG	GG	GG	GG	GG	GG	GG	GG	GG	GG	GG	GG	GG	GA	GA	GG	GG	GG	GG	GG	GG	GA	GG	GG	GG	GG	GG	GG	GG	GG	GG	GA	GG	GG	GG
723247	A/G	Unknown	59306181	+	AA	AA	AA	AA	AA	AA	AA	AA	AA	AA	AA	AA	AA	AA	AA	AA	AG	AA	AA	AA	AA	AA	AG	AA	AG	AA	AA	AA	AA	AG	AA	AA	AA	AA	AA	AA	AA	AG	AA	AA	AA	AG	AA	AA	AG
723867	T/G	Unknown	59357040	+	TT	TT	TG	TG	TG	TT	TT	TG	TG	TG	TG	TG	TG	TG	TG	TT	TG	TG	TG	TG	TG	TG	TG	TG	TT	TT	TT	TT	TG	TT	TG	TT	TG	TG	TG	TG	TT	TT	TG	TG	TT	TT	TT	TG	TG
723867	G/T	Unknown	59357041	+	GG	GG	GG	GG	GG	GG	GG	GG	GG	GG	GG	GG	GG	GG	GG	GG	GG	GG	GG	GG	GG	GG	GG	GT	GG	GT	GG	GG	GG	GG	GG	GG	GG	GG	GG	GG	GG	GG	GT	GG	GG	GG	GG	GG	GG
723867	G/C	Unknown	59357043	+	GG	GG	GG	GG	GG	GG	GG	GG	GG	GG	GG	GG	GG	GG	GG	GG	GG	GG	GG	GG	GG	GG	GG	GC	GG	GC	GG	GG	GG	GG	GG	GG	GG	GG	GG	GG	GG	GG	GC	GG	GG	GG	GG	GG	GG
723867	A/G	Unknown	59357052	+	AA	AA	AG	AG	AG	AA	AA	AG	AG	AG	AG	AG	AG	AG	AG	AA	AG	AG	AG	AG	AG	AG	AG	AG	AA	AA	AA	AA	AG	AA	AG	AA	AG	AG	AG	AG	AA	AA	AG	AG	AA	AA	AA	AG	AG
724297	C/T	Unknown	59392292	+	CT	CC	CC	CT	CC	CC	CC	CC	CC	CC	CC	CT	CC	CC	CC	CC	CC	CC	CC	CT	CC	CT	CC	CC	CC	CC	CC	CT	CC	CC	CT	CC	CC	CC	CC	CC	CC	CC	CC	CC	CT	CC	CC	CC	CC
724491	T/A	Unknown	59408234	+	TT	TT	TT	TA	TT	TT	TA	TT	TT	TT	TT	TA	TT	TA	TT	TT	TA	TA	TT	TT	TT	TA	TT	TT	TT	TT	TT	TT	TT	TA	TA	TT	TT	TA	TT	TT	TT	TT	TA	TT	TT	TT	TT	TT	TT
725286	C/T	Unknown	59473387	+	CT	CC	CT	CC	CC	CC	CC	CT	CT	CT	CT	CC	CT	CC	CC	CT	CT	CC	CT	CT	CT	CT	CC	CC	CC	CT	CC	CT	CT	CC	CC	CT	CT	CT	CT	CC	CC	CC	CC	CT	CC	CC	CC	CC	CC
725652	G/C	Unknown	59503404	+	GC	GC	GC	GC	GC	GC	GG	GC	GC	GC	GG	GC	GC	GC	GC	GG	GC	GC	GC	GC	GC	GC	GC	GG	GC	GC	GC	GC	GC	GG	GC	GC	GC	GC	GC	GC	GC	GC	GC	GC	GC	GG	GC	GC	GC
725948	G/A	Unknown	59527683	+	GG	GG	GG	GG	GG	GA	GG	GG	GG	GG	GG	GG	GA	GG	GG	GG	GG	GG	GG	GG	GG	GG	GA	GG	GA	GG	GA	GA	GG	GG	GG	GG	GG	GG	GG	GG	GG	GG	GG	GG	GG	GG	GG	GG	GG
726143	C/G	Unknown	59543727	+	CC	CC	CC	CC	CC	CC	CC	CG	CG	CC	CC	CC	CC	CC	CC	CC	CC	CC	CC	CC	CC	CC	CC	CC	CC	CC	CC	CC	CC	CC	CC	CC	CC	CC	CC	CC	CC	CC	CC	CC	CC	CC	CC	CC	CC
726837	G/A	Unknown	59600568	+	GG	GG	GG	GG	GG	GA	GG	GG	GA	GG	GG	GG	GG	GG	GG	GG	GG	GG	GG	GG	GG	GA	GA	GG	GG	GG	GG	GG	GG	GG	GG	GG	GG	GG	GG	GG	GG	GG	GA	GG	GG	GA	GG	GG	GG
727070	G/T	Unknown	59619669	+	GT	GT	GT	GT	GT	GT	GT	GT	GT	GT	GT	GT	GT	GT	GT	GT	GT	GT	GT	GT	GT	GT	GT	GT	GT	GT	GT	GT	GT	GT	GG	GT	GT	GT	GT	GT	GT	GT	GT	GT	GT	GT	GT	GT	GG
727310	T/G	Unknown	59639353	+	TT	TG	TT	TT	TT	TT	TG	TT	TT	TT	TT	TT	TT	TT	TT	TT	TT	TT	TT	TG	TT	TT	TT	TT	TG	TT	TT	TT	TT	TT	TT	TT	TT	TT	TG	TT	TT	TT	TT	TT	TT	TT	TT	TT	TG
727448	C/T	Unknown	59650678	+	CC	CC	CC	CC	CC	CT	CC	CC	CT	CT	CC	CC	CC	CC	CT	CC	CC	CC	CC	CC	CC	CC	CT	CC	CC	CC	CC	CC	CC	CC	CC	CC	CC	CC	CT	CC	CC	CT	CT	CC	CC	CC	CC	CC	CC
727488	G/A	Unknown	59653975	+	GA	GA	GG	GA	GA	GA	GA	GA	GG	GA	GA	GA	GA	GA	GG	GG	GA	GA	GA	GA	GA	GA	GA	GA	GA	GA	GA	GA	GA	GA	GA	GA	GA	GA	GA	GA	GA	GA	GG	GA	GA	GG	GG	GA	GA
728104	C/T	Unknown	59704474	+	CT	CC	CT	CC	CT	CC	CT	CC	CC	CC	CT	CC	CC	CC	CC	CC	CC	CT	CT	CT	CC	CC	CC	CC	CT	CT	CC	CC	CC	CC	CT	CC	CT	CC	CT	CT	CT	CT	CT	CT	CT	CC	CT	CT	CT
728788	C/T	Unknown	59760560	+	CC	CC	CC	CC	CC	CC	CC	CC	CC	CC	CC	CC	CC	CC	CC	CC	CC	CC	CC	CC	CC	CC	CC	CC	CC	CC	CT	CC	CC	CC	CC	CC	CC	CC	CC	CC	CC	CC	CC	CC	CC	CC	CC	CC	CC
729197	A/C	Unknown	59794100	+	AA	AA	AA	AA	AA	AA	AA	AA	AA	AA	AA	AA	AC	AA	AA	AC	AA	AA	AA	AA	AA	AA	AC	AA	AA	AC	AA	AA	AA	AA	AA	AA	AC	AA	AA	AA	AA	AC	AA	AA	AC	AA	AA	AA	AA
729402	C/G	Unknown	59810908	+	CG	CG	CG	CG	CG	CG	CG	GG	CG	CG	CG	CG	CG	CC	CG	CG	CG	CG	CG	CG	CG	CG	CG	CG	CG	CC	CG	CG	CG	CG	CG	CG	CG	CG	CG	CG	CG	CG	CG	CG	CG	CG	CG	CG	CG
729570	G/C	Unknown	59824687	+	GG	GG	GG	GG	GG	GG	GC	GC	GG	GG	GG	GG	GG	GG	GG	GG	GG	GG	GG	GG	GG	GG	GG	GG	GG	GG	GC	GG	GG	GG	GG	GG	GG	GG	GG	GG	GG	GG	GG	GG	GG	GG	GG	GG	GG
729570	C/G	Unknown	59824705	+	CC	CC	CC	CC	CC	CC	CG	CG	CC	CC	CC	CC	CC	CC	CC	CC	CC	CC	CC	CC	CC	CC	CC	CC	CC	CC	CG	CC	CC	CC	CC	CC	CC	CC	CC	CC	CC	CC	CC	CC	CC	CC	CC	CC	CC
729868	C/T	Unknown	59849124	+	CC	CC	CC	CC	CC	CC	CC	CC	CC	CT	CC	CC	CC	CC	CC	CC	CC	CC	CC	CC	CC	CC	CC	CC	CT	CC	CC	CC	CC	CC	CC	CC	CC	CC	CC	CC	CC	CC	CC	CC	CC	CC	CC	CT	CC
729929	G/C	Unknown	59854121	+	GC	GC	GC	GC	GC	GC	GC	GC	GC	GC	GC	GC	GC	GG	GC	GC	GC	GC	GC	GC	GC	GC	GC	GC	GC	GC	GC	GC	GC	GC	GC	GC	GC	GC	GC	GC	GC	GC	GG	GC	GC	GC	GC	GC	GC
729943	C/A	Unknown	59855296	+	CC	CC	CC	CA	CA	CC	CA	CC	CC	CC	CC	CC	CC	CC	CA	CC	CC	CC	CC	CC	CC	CC	CC	CC	CC	CC	CC	CA	CC	CC	CC	CA	CC	CC	CA	CC	CC	CC	CC	CC	CC	CC	CC	CC	CC
730021	G/T	Unknown	59861699	+	GG	GG	GG	GG	GG	GT	GG	GG	GT	GG	GG	GG	GG	GG	GG	GG	GG	GG	GG	GG	GG	GG	GG	GG	GG	GG	GG	GG	GG	GG	GT	GG	GG	GG	GG	GG	GG	GG	GG	GG	GG	GG	GG	GG	GG
730638	G/A	Unknown	59912279	+	GG	GG	GG	GG	GG	GG	GA	GG	GG	GG	GG	GA	GA	GG	GG	GG	GG	GG	GG	GG	GG	GG	GG	GG	GG	GG	GG	GA	GG	GG	GG	GG	GG	GG	GG	GG	GG	GG	GA	GA	GG	GG	GG	GG	GA
731762	G/A	Unknown	60004431	+	GG	GG	GG	GG	GG	GG	GA	GG	GG	GG	GG	GG	GA	GG	GG	GG	GG	GG	GG	GG	GG	GG	GG	GG	GG	GG	GG	GG	GG	GG	GG	GG	GG	GG	GG	GG	GG	GG	GG	GG	GG	GG	GG	GG	GG
731762	A/G	Unknown	60004446	+	AA	AA	AA	AA	AG	AA	AA	AA	AA	AA	AA	AA	AA	AA	AA	AA	AA	AG	AA	AA	AA	AA	AG	AG	AA	AA	AA	AA	AA	AA	AA	AA	AA	AA	AA	AA	AA	AA	AA	AA	AA	AA	AA	AA	AA
731852	C/A	Unknown	60011824	+	CA	CA	CA	CA	CA	CA	CA	CA	CA	CA	CA	CA	CA	CA	CA	CA	CA	CA	CA	CA	CA	CA	CA	CA	CA	CA	CA	CA	CA	CA	CA	CA	CA	CA	CA	CA	CA	CA	CA	CA	CA	CA	CA	CA	CA
732418	C/T	Unknown	60058226	+	CC	CC	CC	CC	CC	CC	CC	CC	CC	CT	CC	CC	CC	CC	CC	CC	CC	CC	CC	CC	CT	CC	CC	CC	CC	CC	CC	CC	CT	CT	CC	CC	CC	CT	CC	CC	CC	CC	CC	CC	CC	CT	CC	CC	CC
732497	C/T	Unknown	60064686	+	CC	CT	CT	CT	CC	CC	CC	CT	CT	CT	CT	CC	CT	CT	CT	CT	CT	CT	CT	CT	CT	CC	CC	CT	CC	CC	CC	CT	CT	CC	CT	CC	CT	CC	CT	CT	CT	CC	CT	CT	CT	CT	CC	CT	CT
732497	T/G	Unknown	60064723	+	TT	TG	TG	TG	TT	TT	TT	TG	TG	TG	TG	TT	TG	TG	TG	TG	TG	TG	TG	TG	TG	TT	TT	TG	TT	TT	TT	TG	TG	TT	TG	TT	TG	TT	TG	TG	TG	TT	TG	TG	TG	TG	TT	TG	TG
732784	G/A	Unknown	60088224	+	GG	GG	GG	GG	GA	GG	GG	GG	GG	GG	GG	GG	GG	GG	GG	GG	GG	GA	GG	GG	GG	GG	GG	GG	GG	GG	GG	GG	GA	GA	GG	GG	GG	GG	GG	GG	GG	GG	GA	GG	GG	GG	GG	GG	GG
732784	C/T	Unknown	60088229	+	CT	CT	CC	CC	CC	CC	CC	CC	CC	CT	CC	CC	CT	CC	CC	CC	CT	CC	CC	CC	CC	CC	CC	CC	CC	CC	CC	CC	CC	CC	CC	CC	CC	CC	CC	CC	CC	CT	CC	CC	CC	CC	CC	CC	CC
732915	C/A	Unknown	60098955	+	CC	CC	CC	CC	CC	CA	CC	CC	CC	CC	CA	CC	CC	CC	CC	CC	CC	CC	CC	CC	CC	CC	CC	CC	CC	CC	CC	CC	CC	CC	CC	CC	CC	CC	CC	CC	CC	CC	CC	CC	CC	CC	CC	CC	CC
732915	A/G	Unknown	60098986	+	AA	AA	AG	AA	AA	AA	AA	AA	AG	AA	AA	AA	AA	AA	AG	AG	AA	AA	AA	AA	AA	AA	AA	AA	AA	AA	AA	AA	AA	AA	AA	AA	AA	AA	AA	AA	AA	AA	AA	AG	AA	AA	AA	AA	AA
733178	G/A	Unknown	60120542	+	GG	GG	GG	GG	GG	GG	GG	GG	GA	GG	GG	GG	GG	GG	GG	GG	GG	GG	GG	GG	GG	GG	GG	GG	GG	GG	GG	GG	GG	GG	GG	GG	GG	GA	GG	GG	GG	GG	GG	GG	GG	GG	GG	GG	GG
733312	A/T	Unknown	60131505	+	AA	AA	AA	AA	AA	AT	AA	AA	AA	AA	AA	AA	AA	AA	AA	AA	AA	AA	AA	AA	AA	AA	AA	AA	AA	AA	AA	AA	AA	AA	AA	AT	AA	AA	AA	AA	AA	AA	AA	AA	AA	AA	AA	AA	AA
733382	A/G	Unknown	60137264	+	AA	AA	AA	AA	AA	AA	AG	AA	AA	AG	AA	AG	AA	AG	AG	AA	AG	AA	AA	AA	AA	AA	AA	AA	AG	AA	AA	AA	AG	AA	AA	AA	AG	AA	AA	AA	AG	AG	AA	AA	AG	AA	AA	AA	AA
733382	A/G	Unknown	60137268	+	AG	AA	AA	AA	AA	AA	AA	AA	AA	AA	AA	AA	AA	AA	AA	AA	AA	AA	AA	AA	AA	AA	AG	AA	AA	AA	AA	AA	AA	AA	AA	AA	AA	AA	AA	AA	AG	AA	AA	AA	AA	AA	AA	AA	AA
733778	G/C	Unknown	60169724	+	GG	GG	GG	GG	GG	GG	GG	GG	GC	GG	GG	GG	GG	GG	GG	GG	GG	GG	GG	GG	GG	GG	GG	GG	GG	GG	GG	GG	GG	GC	GC	GG	GG	GG	GG	GG	GG	GG	GG	GG	GG	GG	GG	GG	GG
733991	A/C	Unknown	60187194	+	AA	AA	AA	AA	AA	AA	AC	AA	AA	AA	AA	AA	AA	AA	AA	AA	AA	AC	AA	AA	AA	AA	AA	AA	AA	AA	AA	AA	AA	AA	AA	AA	AA	AA	AA	AA	AA	AA	AA	AC	AA	AA	AA	AA	AA
733991	A/G	Unknown	60187208	+	AA	AA	AA	AA	AA	AA	AG	AA	AA	AA	AA	AA	AA	AA	AA	AA	AA	AG	AA	AA	AA	AA	AA	AA	AA	AA	AA	AA	AA	AA	AA	AA	AA	AA	AA	AA	AA	AA	AA	AG	AA	AA	AA	AA	AA
734030	C/G	Unknown	60190392	+	CC	CC	CC	CC	CC	CC	CG	CC	CC	CC	CC	CC	CC	CC	CC	CC	CC	CC	CC	CC	CC	CC	CC	CC	CC	CG	CC	CG	CC	CC	CC	CG	CC	CC	CC	CC	CC	CC	CC	CC	CC	CC	CC	CC	CG
734030	C/A	Unknown	60190399	+	CC	CC	CC	CC	CC	CC	CC	CC	CC	CC	CC	CC	CA	CC	CC	CC	CC	CA	CC	CC	CC	CC	CC	CC	CC	CC	CC	CC	CC	CC	CC	CC	CC	CC	CC	CC	CC	CC	CC	CC	CC	CC	CC	CC	CC
734076	G/A	Unknown	60194159	+	GG	GG	GG	GG	GG	GA	GA	GG	GG	GG	GG	GG	GG	GG	GG	GG	GG	GG	GG	GG	GG	GG	GG	GG	GG	GG	GG	GG	GA	GG	GG	GG	GG	GG	GG	GG	GG	GG	GG	GG	GG	GG	GG	GG	GG
734076	C/G	Unknown	60194193	+	CG	CC	CC	CG	CC	CC	CC	CC	CC	CC	CC	CC	CG	CG	CG	CC	CC	CC	CC	CC	CC	CC	CC	CC	CC	CC	CC	CC	CC	CC	CC	CC	CC	CC	CC	CC	CG	CG	CC	CC	CG	CC	CC	CC	CC
735103	C/A	Unknown	60278390	+	CC	CA	CC	CC	CA	CC	CC	CC	CC	CC	CC	CC	CC	CC	CC	CC	CC	CA	CC	CC	CC	CC	CC	CA	CC	CC	CC	CC	CC	CC	CA	CC	CC	CC	CC	CC	CC	CC	CC	CC	CC	CC	CC	CC	CC
735519	C/A	Unknown	60312486	+	CC	CC	CC	CA	CA	CC	CC	CC	CC	CC	CC	CC	CC	CC	CA	CC	CC	CC	CC	CC	CC	CC	CC	CC	CC	CC	CC	CA	CC	CC	CA	CA	CC	CC	CC	CC	CC	CC	CC	CC	CC	CC	CA	CC	CC
735733	G/T	Unknown	60330033	+	GG	GT	GG	GT	GG	GT	GG	GG	GT	GT	GT	GT	GT	GG	GG	GT	GT	GG	GG	GG	GT	GT	GT	GG	GG	GT	GG	GT	GG	GG	GT	GG	GG	GT	GT	GG	GT	GG	GG	GG	GT	GT	GT	GG	GT
735997	C/T	Unknown	60351686	+	CT	CC	CC	CC	CC	CT	CT	CC	CC	CC	CC	CT	CT	CC	CC	CC	CT	CC	CC	CT	CC	CC	CC	CC	CT	CC	CT	CC	CT	CT	CT	CC	CC	CC	CC	CC	CC	CT	CC	CC	CC	CC	CT	CC	CT
736258	G/C	Unknown	60373091	+	GG	GG	GG	GG	GG	GG	GG	GG	GG	GG	GG	GG	GG	GG	GG	GG	GG	GG	GG	GG	GG	GG	GG	GG	GG	GG	GC	GG	GG	GG	GG	GG	GG	GG	GG	GG	GG	GG	GC	GG	GG	GG	GG	GG	GG
736258	A/G	Unknown	60373096	+	AA	AA	AA	AA	AA	AA	AA	AA	AA	AA	AA	AA	AA	AA	AA	AA	AA	AA	AA	AA	AA	AA	AA	AA	AA	AA	AA	AA	AA	AA	AA	AA	AA	AA	AA	AA	AA	AA	AA	AA	AA	AA	AA	AA	AA
738317	G/A	Unknown	60541968	+	GG	GG	GG	GG	GG	GG	GG	GG	GG	GG	GG	GG	GG	GG	GG	GA	GG	GG	GG	GG	GG	GG	GG	GG	GG	GG	GG	GG	GG	GG	GG	GG	GG	GG	GG	GG	GG	GG	GG	GG	GG	GG	GG	GG	GG
738760	T/A	Unknown	60578247	+	TA	TA	TT	TT	TT	TT	TT	TT	TT	TT	TT	TT	TT	TT	TT	TT	TT	TT	TT	TT	TT	TT	TT	TT	TT	TT	TT	TT	TT	TA	TT	TT	TA	TT	TT	TT	TT	TT	TT	TT	TT	TT	TT	TT	TT
739279	C/A	Unknown	60620810	+	CC	CC	CC	CC	CC	CC	CC	CC	CC	CC	CC	CC	CC	CC	CC	CC	CC	CC	CC	CC	CC	CC	CC	CC	CC	CC	CC	CC	CC	CC	CC	CC	CC	CA	CC	CC	CC	CA	CC	CC	CC	CA	CA	CC	CC
739817	G/A	Unknown	60664925	+	GA	GA	GA	GA	GA	GG	GA	GA	GA	GA	GA	GA	GG	GA	GA	GA	GA	GA	GA	GA	GA	GA	GA	GA	GA	GA	GA	GA	GA	GA	GA	GA	GA	GA	GA	GA	GA	GA	GA	GA	GA	GA	GA	GA	GA
739925	C/A	Unknown	60673830	+	CA	CC	CC	CC	CC	CC	CA	CC	CC	CC	CC	CC	CC	CC	CC	CC	CC	CA	CC	CC	CC	CC	CC	CC	CC	CA	CC	CC	CC	CC	CC	CC	CC	CC	CC	CC	CC	CC	CA	CA	CC	CC	CC	CC	CC
740088	T/A	Unknown	60687174	+	TT	TT	TT	TA	TT	TT	TT	TT	TT	TT	TT	TT	TT	TT	TA	TT	TT	TT	TT	TT	TT	TT	TT	TT	TT	TT	TT	TA	TA	TT	TT	TT	TT	TT	TT	TT	TT	TT	TT	TT	TT	TT	TT	TT	TT
740584	G/A	Unknown	60727829	+	GG	GA	GG	GG	GG	GG	GG	GG	GG	GA	GG	GG	GG	GG	GG	GG	GG	GG	GG	GG	GG	GG	GA	GG	GG	GG	GG	GG	GG	GG	GG	GG	GG	GG	GG	GG	GG	GG	GG	GG	GG	GG	GG	GG	GG
740946	A/C	Unknown	60757513	+	AC	AA	AA	AA	AA	AA	AA	AA	AA	AA	AA	AA	AA	AA	AA	AA	AC	AA	AA	AA	AA	AC	AA	AA	AA	AA	AA	AA	AA	AC	AA	AA	AA	AA	AA	AA	AA	AA	AA	AA	AA	AA	AA	AA	AA
741215	G/A	Unknown	60779574	+	GG	GG	GG	GG	GG	GG	GG	GG	GG	GG	GG	GG	GG	GG	GG	GG	GG	GG	GG	GG	GG	GG	GA	GG	GG	GG	GG	GG	GG	GG	GG	GA	GG	GG	GG	GG	GG	GG	GG	GG	GG	GG	GG	GG	GG
741215	A/G	Unknown	60779584	+	AA	AA	AA	AA	AA	AA	AG	AG	AA	AG	AA	AA	AA	AA	AA	AA	AA	AA	AA	AA	AA	AA	AA	AA	AA	AA	AA	AA	AA	AG	AA	AA	AA	AA	AA	AA	AA	AA	AA	AA	AA	AA	AA	AA	AA
741215	G/A	Unknown	60779592	+	GG	GG	GG	GG	GG	GG	GA	GA	GG	GG	GG	GG	GG	GG	GG	GG	GG	GG	GG	GG	GG	GG	GG	GG	GG	GG	GG	GG	GG	GA	GG	GG	GG	GG	GG	GG	GG	GG	GG	GG	GG	GG	GG	GG	GG
741374	C/T	Unknown	60792599	+	CC	CC	CC	CC	CC	CT	CT	CC	CC	CC	CC	CC	CC	CC	CC	CC	CC	CC	CC	CC	CC	CC	CT	CC	CC	CC	CC	CC	CC	CT	CC	CC	CC	CC	CC	CC	CC	CC	CC	CC	CC	CT	CC	CC	CC
741849	G/A	Unknown	60831582	+	GG	GG	GG	GG	GG	GG	GG	GA	GG	GG	GG	GG	GG	GG	GG	GG	GG	GG	GG	GG	GG	GG	GG	GG	GG	GG	GG	GG	GG	GG	GG	GG	GG	GG	GG	GG	GG	GG	GG	GG	GG	GG	GG	GG	GG
742618	A/T	Unknown	60894627	+	AT	AA	AA	AA	AA	AA	AT	AA	AA	AA	AA	AT	AA	AA	AA	AA	AA	AA	AA	AA	AA	AA	AA	AA	AA	AA	AA	AA	AA	AA	AA	AA	AA	AA	AA	AA	AA	AA	AA	AA	AA	AA	AA	AA	AA
743105	G/A	Unknown	60934563	+	GG	GG	GG	GG	GG	GG	GG	GG	GG	GG	GG	GG	GA	GG	GG	GG	GG	GG	GG	GG	GG	GG	GG	GG	GG	GG	GG	GG	GG	GA	GG	GG	GG	GG	GG	GG	GG	GG	GA	GG	GG	GG	GG	GG	GG
743105	T/C	Unknown	60934564	+	TT	TT	TT	TT	TT	TT	TT	TT	TT	TT	TT	TT	TC	TT	TT	TT	TT	TT	TT	TT	TT	TT	TT	TT	TT	TT	TT	TT	TT	TC	TT	TT	TT	TT	TT	TT	TT	TT	TC	TT	TT	TT	TT	TT	TT
743580	C/T	Unknown	60973513	+	CT	CT	CT	CT	CC	CT	CT	CC	CT	CT	CT	CT	CT	CT	CT	CT	CT	CC	CT	CT	CT	CT	CC	CC	CT	CT	CC	CT	CT	CT	CT	CT	CT	CT	CT	CT	CT	CT	CT	CT	CT	CT	CT	CT	CT
743758	G/C	Unknown	60988095	+	GG	GG	GG	GG	GG	GG	GG	GG	GG	GG	GG	GG	GG	GG	GG	GG	GG	GG	GG	GG	GG	GG	GG	GG	GC	GG	GG	GG	GG	GG	GG	GG	GG	GG	GG	GG	GG	GG	GG	GC	GC	GC	GC	GG	GG
743805	C/T	Unknown	60991954	+	CT	CC	CC	CC	CC	CC	CC	CC	CT	CC	CC	CT	CC	CC	CC	CC	CT	CC	CC	CC	CC	CC	CC	CC	CT	CC	CT	CC	CC	CC	CC	CC	CC	CT	CC	CC	CC	CC	CC	CC	CC	CC	CC	CC	CC
743836	C/G	Unknown	60994487	+	CG	CG	CG	CG	CC	CG	CG	CG	CG	CG	CG	CG	CG	CG	CG	CG	CG	CG	CG	CG	CC	CC	CG	CC	CG	CG	CC	CG	CG	CG	CG	CG	CG	CG	CG	CG	CG	CG	CG	CG	CG	CC	CG	CG	CG
743836	C/A	Unknown	60994497	+	CA	CA	CA	CA	CC	CA	CA	CA	CA	CA	CA	CA	CA	CA	CA	CA	CA	CA	CA	CA	CC	CC	CA	CC	CA	CA	CC	CA	CA	CA	CA	CA	CA	CA	CA	CA	CA	CA	CA	CA	CA	CC	CA	CA	CA
743938	T/C	Unknown	61002869	+	TC	TC	TC	TC	TC	TC	TC	TC	TC	TC	TC	TC	TC	TT	TC	TC	TC	TC	TC	TC	TC	TC	TC	TC	TC	TC	TC	TC	TC	TC	TC	TC	TC	TC	TC	TC	TC	TC	TC	TC	TC	TC	TC	TC	TC
744600	C/T	Unknown	61057133	+	CC	CC	CC	CC	CT	CC	CC	CC	CC	CC	CC	CC	CC	CC	CC	CT	CC	CC	CC	CC	CC	CC	CC	CT	CC	CT	CC	CC	CC	CC	CC	CC	CC	CC	CC	CC	CC	CC	CC	CC	CC	CC	CC	CC	CC
745119	C/T	Unknown	61099699	+	CT	CT	CT	CT	CT	CT	CT	CT	CT	CT	CT	CT	CT	CT	CT	CT	CT	CT	CT	CT	CT	CT	CT	CT	CT	CT	CT	CT	CT	CT	CT	CT	CT	CT	CT	CT	CT	CT	CT	TT	CT	CT	CT	CT	CT
745630	T/C	Unknown	61141619	+	TT	TT	TT	TT	TT	TT	TC	TT	TT	TT	TT	TT	TT	TT	TT	TT	TT	TT	TT	TT	TT	TT	TT	TC	TT	TT	TT	TT	TT	TT	TT	TT	TT	TT	TT	TT	TT	TT	TT	TT	TT	TT	TT	TT	TT
745759	G/A	Unknown	61152182	+	GA	GA	GA	GA	GA	GA	GA	GA	GA	GA	GA	GA	GG	GA	GA	GA	GA	GA	GA	GG	GA	GG	GA	GA	GA	GA	GA	GA	GA	GA	GA	GA	GA	GA	GA	GA	GA	GA	GA	GA	GA	GA	GA	GA	GA
745918	C/T	Unknown	61165234	+	CC	CC	CC	CC	CC	CC	CC	CC	CC	CC	CC	CC	CT	CC	CC	CC	CC	CC	CC	CC	CC	CC	CC	CC	CC	CC	CC	CT	CC	CC	CT	CC	CC	CC	CC	CC	CC	CC	CT	CC	CC	CT	CC	CC	CC
746947	A/G	Unknown	61249584	+	AA	AA	AA	AA	AA	AA	AA	AA	AA	AA	AA	AA	AA	AA	AA	AA	AG	AA	AA	AA	AA	AA	AA	AA	AA	AA	AA	AA	AA	AG	AA	AA	AA	AA	AG	AA	AA	AA	AA	AA	AA	AA	AA	AA	AA
746947	G/C	Unknown	61249592	+	GG	GG	GG	GG	GC	GG	GG	GG	GG	GG	GG	GG	GG	GG	GG	GG	GG	GG	GG	GG	GC	GG	GG	GG	GG	GG	GG	GG	GG	GG	GG	GG	GG	GG	GG	GG	GG	GG	GC	GG	GG	GG	GG	GG	GG
747762	G/C	Unknown	61316422	+	GG	GG	GG	GC	GG	GG	GG	GG	GC	GG	GC	GG	GG	GG	GG	GC	GG	GG	GG	GG	GG	GG	GC	GG	GG	GG	GG	GG	GG	GG	GG	GG	GG	GG	GG	GG	GG	GG	GC	GG	GG	GG	GG	GG	GG
747837	C/G	Unknown	61322581	+	CC	CC	CC	CC	CC	CC	CC	CC	CC	CC	CC	CC	CC	CC	CC	CG	CC	CC	CC	CC	CC	CC	CC	CC	CC	CC	CC	CC	CC	CC	CC	CC	CC	CC	CC	CC	CG	CC	CC	CC	CC	CC	CC	CC	CG
748594	T/A	Unknown	61384664	+	TT	TT	TT	TT	TT	TT	TT	TT	TT	TT	TT	TT	TT	TT	TA	TT	TT	TT	TT	TT	TT	TT	TT	TT	TT	TA	TT	TT	TT	TT	TT	TT	TT	TT	TT	TT	TT	TT	TT	TT	TT	TT	TT	TT	TT
748955	G/T	Unknown	61414236	+	GG	GG	GG	GG	GG	GG	GG	GT	GG	GG	GG	GG	GG	GG	GG	GG	GG	GG	GG	GG	GG	GG	GG	GG	GT	GG	GG	GG	GG	GG	GG	GG	GG	GG	GG	GG	GG	GG	GG	GG	GG	GG	GT	GG	GG
749515	T/C	Unknown	61460159	+	TC	TC	TC	TC	TC	TC	TC	TC	TC	TC	TC	TT	TC	TC	TC	TC	TC	TC	TC	TC	TC	TC	TC	TC	TC	TC	TC	TC	TC	TC	TT	TT	TC	TC	TC	TC	TC	TC	TC	TC	TC	TC	TC	TC	TC
749925	G/A	Unknown	61493798	+	GG	GG	GG	GG	GG	GG	GG	GG	GG	GG	GG	GG	GG	GG	GG	GA	GG	GG	GG	GG	GG	GG	GG	GG	GG	GG	GG	GG	GG	GG	GG	GG	GG	GG	GG	GG	GG	GG	GG	GG	GG	GG	GA	GG	GG
750013	G/C	Unknown	61500994	+	GG	GG	GC	GG	GC	GG	GG	GG	GC	GG	GG	GG	GG	GG	GG	GG	GG	GC	GG	GG	GG	GG	GC	GG	GC	GG	GC	GC	GG	GC	GC	GG	GG	GG	GG	GG	GG	GC	GG	GG	GG	GC	GG	GG	GC
750013	G/C	Unknown	61500996	+	GG	GG	GG	GG	GG	GG	GG	GC	GG	GG	GG	GG	GG	GG	GG	GG	GG	GG	GG	GG	GG	GG	GG	GG	GC	GG	GG	GG	GG	GC	GG	GG	GG	GG	GG	GG	GG	GG	GG	GG	GG	GG	GG	GG	GG
750164	T/G	Unknown	61513407	+	TG	TT	TT	TT	TG	TG	TT	TT	TT	TT	TT	TT	TT	TT	TT	TT	TG	TT	TT	TT	TG	TT	TT	TT	TT	TT	TT	TT	TT	TT	TT	TT	TT	TT	TG	TT	TT	TT	TT	TT	TT	TT	TT	TT	TT
750385	G/C	Unknown	61531515	+	GC	GC	GC	GC	GC	GC	GC	GC	GC	GC	GC	GC	GC	GC	GC	GC	GC	GC	GC	GC	GC	GC	GC	GC	GC	GC	GC	GC	GC	GC	GC	GC	GC	GC	GC	GC	GG	GG	GG	GC	GC	GC	GC	GC	GC
750710	G/C	Unknown	61558151	+	GG	GC	GC	GC	GC	GC	GC	GG	GG	GC	GC	GC	GG	GG	GC	GC	GG	GC	GC	GC	GC	GC	GG	GC	GG	GC	GC	GG	GC	GG	GC	GC	GC	GC	GC	GC	GC	GC	GC	GC	GC	GC	GC	GG	GG
751389	C/T	Unknown	61613871	+	CT	CC	CC	CC	CC	CC	CC	CC	CC	CC	CC	CT	CT	CC	CC	CC	CC	CC	CC	CC	CC	CC	CC	CC	CC	CC	CC	CC	CC	CC	CC	CC	CC	CC	CC	CC	CC	CC	CC	CC	CT	CC	CC	CC	CC
751389	C/A	Unknown	61613874	+	CC	CC	CC	CC	CC	CC	CC	CC	CC	CC	CC	CC	CC	CC	CC	CC	CC	CC	CC	CC	CC	CC	CC	CC	CC	CC	CC	CC	CA	CC	CC	CC	CC	CC	CC	CC	CC	CC	CC	CC	CC	CC	CC	CC	CC
751389	G/T	Unknown	61613875	+	GG	GG	GG	GG	GG	GG	GG	GG	GG	GG	GG	GG	GG	GG	GG	GG	GG	GG	GG	GG	GG	GG	GG	GG	GG	GG	GG	GG	GT	GG	GG	GG	GG	GG	GG	GG	GG	GG	GG	GG	GG	GG	GG	GG	GG
751446	C/T	Unknown	61618528	+	CT	CT	CT	CT	CT	CT	CT	CT	CT	CT	CT	CT	CT	CT	CT	CT	CT	CT	CT	CT	CT	CT	CT	CT	CT	CT	CT	CT	CT	CT	CT	CT	CT	CT	CT	CT	CT	CT	CT	CT	CT	CT	CC	CT	CT
751623	T/A	Unknown	61633051	+	TT	TA	TT	TT	TT	TT	TT	TT	TT	TT	TT	TT	TT	TA	TT	TT	TT	TT	TT	TT	TT	TT	TT	TT	TT	TT	TA	TT	TT	TT	TT	TT	TT	TT	TT	TT	TT	TT	TT	TT	TT	TA	TT	TT	TT
752662	C/A	Unknown	61718243	+	CC	CC	CC	CC	CA	CC	CC	CC	CC	CC	CC	CC	CC	CC	CC	CC	CC	CC	CC	CC	CC	CC	CC	CA	CC	CC	CC	CC	CC	CA	CC	CC	CC	CC	CC	CC	CC	CC	CC	CC	CA	CC	CC	CC	CC
752952	T/A	Unknown	61742001	+	TA	TA	TA	TA	TA	TA	TA	TA	TA	TA	TA	TA	TA	TA	TA	TA	TA	TA	TA	TA	TA	TA	TA	TA	TA	TA	TA	TA	TA	TA	TA	TA	TA	TA	TA	TA	TA	TA	TA	TA	TA	TA	TA	TA	TA
752952	A/G	Unknown	61742002	+	AG	AG	AG	AG	AG	AG	AG	AG	AG	AG	AG	AG	AG	AG	AG	AG	AG	AG	AG	AG	AG	AG	AG	AG	AG	AG	AG	AG	AG	AG	AG	AG	AG	AG	AG	AG	AG	AG	AG	AG	AG	AG	AG	AG	AG
753155	G/C	Unknown	61758644	+	GG	GG	GG	GG	GG	GG	GG	GG	GG	GG	GC	GG	GG	GG	GG	GG	GG	GG	GG	GG	GG	GG	GG	GG	GG	GG	GG	GG	GG	GG	GC	GG	GG	GG	GC	GG	GG	GG	GG	GG	GG	GG	GG	GG	GG
753480	C/A	Unknown	61785312	+	CC	CC	CC	CC	CC	CA	CC	CC	CC	CC	CC	CC	CC	CC	CC	CC	CC	CC	CC	CC	CC	CC	CC	CC	CC	CC	CC	CA	CC	CC	CC	CC	CC	CC	CC	CC	CC	CA	CA	CC	CC	CC	CC	CC	CC
753895	C/G	Unknown	61819328	+	CC	CC	CC	CC	CC	CC	CG	CC	CC	CC	CG	CC	CC	CC	CC	CC	CC	CC	CC	CC	CC	CC	CC	CG	CC	CG	CC	CG	CC	CC	CC	CC	CC	CC	CC	CC	CC	CC	CG	CC	CC	CC	CC	CC	CC
753895	G/A	Unknown	61819349	+	GG	GG	GG	GG	GA	GA	GG	GA	GG	GG	GG	GG	GG	GG	GG	GG	GG	GG	GG	GG	GG	GA	GA	GG	GG	GG	GG	GG	GG	GG	GA	GG	GG	GG	GA	GG	GG	GG	GA	GG	GA	GG	GG	GG	GG
754576	C/T	Unknown	61875200	+	CC	CC	CC	CC	CC	CC	CC	CC	CC	CC	CT	CC	CC	CC	CC	CT	CC	CC	CC	CT	CC	CC	CT	CC	CC	CC	CC	CC	CC	CC	CC	CC	CC	CC	CC	CC	CC	CC	CC	CC	CT	CC	CC	CC	CC
754760	G/T	Unknown	61890294	+	GG	GT	GG	GG	GG	GT	GG	GG	GG	GG	GG	GG	GG	GG	GG	GG	GG	GG	GG	GG	GT	GG	GG	GG	GG	GT	GT	GG	GG	GG	GG	GG	GG	GG	GG	GG	GG	GG	GT	GG	GG	GT	GG	GG	GG
754860	C/G	Unknown	61898460	+	CC	CC	CC	CC	CC	CC	CC	CC	CC	CC	CC	CC	CC	CC	CC	CC	CC	CC	CC	CC	CC	CC	CG	CC	CC	CC	CC	CC	CC	CC	CC	CC	CC	CC	CC	CC	CC	CC	CC	CC	CC	CC	CC	CC	CC
754897	C/T	Unknown	61901479	+	CC	CT	CC	CC	CC	CC	CT	CC	CC	CC	CC	CC	CC	CC	CC	CC	CC	CC	CC	CC	CC	CC	CC	CC	CC	CC	CC	CC	CC	CC	CC	CC	CC	CC	CC	CC	CC	CC	CC	CC	CC	CC	CC	CC	CC
755104	C/T	Unknown	61918472	+	CC	CT	CC	CT	CC	CC	CC	CC	CC	CC	CC	CC	CC	CC	CC	CC	CC	CC	CC	CC	CC	CC	CC	CC	CC	CC	CC	CC	CC	CT	CT	CC	CC	CC	CC	CC	CC	CT	CC	CC	CC	CT	CC	CC	CT
755466	G/A	Unknown	61948177	+	GG	GG	GG	GG	GG	GG	GG	GG	GG	GG	GG	GG	GG	GG	GG	GG	GG	GG	GG	GG	GG	GG	GG	GG	GG	GG	GG	GG	GG	GG	GA	GG	GG	GG	GG	GG	GG	GG	GG	GG	GG	GG	GG	GG	GG
755693	A/G	Unknown	61966755	+	AA	AA	AA	AA	AA	AA	AA	AA	AA	AA	AA	AA	AG	AA	AA	AA	AA	AA	AA	AA	AA	AA	AA	AA	AA	AA	AG	AA	AA	AA	AA	AA	AA	AA	AA	AA	AA	AA	AA	AA	AA	AA	AG	AA	AG
755693	C/T	Unknown	61966772	+	CC	CC	CC	CC	CC	CC	CC	CC	CC	CT	CC	CC	CC	CC	CT	CC	CC	CC	CC	CC	CC	CC	CC	CC	CC	CC	CC	CC	CC	CC	CC	CC	CC	CC	CC	CC	CC	CC	CC	CC	CC	CC	CC	CC	CC
756001	G/A	Unknown	61992025	+	GA	GG	GG	GA	GA	GA	GA	GA	GA	GA	GA	GA	GA	GA	GA	GG	GA	GG	GA	GA	GA	GA	GA	GA	GA	GA	GA	GG	GG	GA	GA	GA	GG	GA	GA	GA	GA	GA	GA	GA	GA	GA	GA	GA	GA
756018	C/T	Unknown	61993432	+	CT	CT	CC	CT	CC	CC	CC	CT	CT	CC	CC	CC	CC	CC	CT	CC	CC	CT	CC	CC	CC	CC	CC	CC	CC	CT	CC	CC	CC	CC	CC	CC	CC	CC	CT	CC	CC	CC	CT	CT	CT	CC	CC	CC	CC
756081	T/C	Unknown	61998569	+	TT	TC	TT	TT	TT	TT	TT	TT	TT	TT	TT	TC	TT	TC	TT	TT	TT	TT	TT	TT	TT	TT	TT	TT	TT	TT	TT	TT	TT	TT	TT	TT	TC	TC	TT	TT	TT	TT	TT	TT	TT	TC	TT	TT	TC
756521	C/T	Unknown	62034656	+	CT	CC	CC	CC	CC	CC	CC	CC	CC	CC	CC	CC	CT	CC	CC	CC	CC	CC	CC	CC	CC	CC	CC	CC	CC	CC	CT	CC	CC	CC	CC	CC	CC	CC	CC	CC	CT	CC	CC	CC	CC	CC	CC	CC	CC
757388	C/T	Unknown	62105776	+	CT	CC	CC	CC	CC	CC	CC	CC	CC	CC	CC	CC	CC	CT	CC	CC	CC	CT	CC	CC	CC	CT	CC	CC	CC	CC	CT	CC	CC	CT	CC	CT	CC	CC	CC	CC	CC	CC	CC	CC	CC	CC	CC	CC	CC
757421	C/A	Unknown	62108472	+	CA	CC	CC	CC	CC	CC	CC	CC	CC	CC	CC	CA	CA	CC	CC	CC	CC	CC	CC	CC	CC	CA	CA	CC	CC	CC	CA	CA	CC	CC	CC	CC	CC	CC	CC	CC	CC	CC	CA	CC	CC	CC	CC	CC	CC
757732	G/A	Unknown	62133956	+	GG	GG	GG	GG	GG	GG	GG	GG	GG	GG	GG	GA	GG	GG	GG	GG	GG	GG	GG	GG	GG	GG	GG	GA	GG	GA	GG	GG	GG	GG	GG	GG	GG	GG	GG	GG	GG	GG	GG	GG	GG	GG	GG	GG	GG
758363	A/G	Unknown	62185722	+	AG	AA	AA	AA	AA	AG	AA	AA	AG	AA	AA	AA	AA	AA	AA	AA	AA	AA	AA	AA	AA	AA	AA	AA	AA	AA	AA	AA	AA	AA	AA	AA	AA	AA	AA	AA	AA	AA	AA	AA	AA	AA	AA	AA	AA
758363	C/T	Unknown	62185723	+	CT	CC	CC	CC	CC	CT	CC	CC	CT	CC	CC	CC	CC	CC	CC	CC	CC	CC	CC	CC	CC	CC	CC	CC	CC	CC	CC	CC	CC	CC	CC	CC	CC	CC	CC	CC	CC	CC	CC	CC	CC	CC	CC	CC	CC
758374	C/T	Unknown	62186618	+	CC	CC	CC	CC	CT	CC	CC	CC	CC	CC	CC	CC	CC	CC	CC	CC	CC	CC	CC	CC	CC	CC	CC	CT	CC	CC	CC	CC	CC	CC	CC	CC	CC	CC	CC	CC	CC	CC	CC	CC	CC	CC	CC	CC	CT
758536	G/A	Unknown	62199888	+	GA	GA	GA	GA	GA	GA	GA	GA	GA	GA	GA	GA	GA	GA	GA	GA	GA	GA	GA	GA	GA	GA	GA	GA	GA	GA	GA	GA	GA	GA	GA	GA	GA	GA	GA	GA	GA	GA	GG	GA	GA	GA	GA	GA	GA
759023	G/A	Unknown	62239833	+	GG	GG	GG	GG	GG	GA	GG	GA	GG	GG	GG	GG	GG	GG	GG	GA	GG	GG	GG	GG	GG	GG	GG	GG	GG	GG	GG	GG	GG	GG	GG	GG	GG	GG	GG	GG	GG	GG	GG	GG	GG	GG	GG	GG	GG
759091	A/T	Unknown	62245389	+	AA	AA	AA	AA	AT	AT	AA	AA	AA	AA	AA	AA	AA	AA	AA	AA	AA	AT	AA	AA	AA	AA	AA	AA	AA	AT	AA	AA	AA	AA	AA	AT	AA	AA	AA	AA	AA	AT	AT	AA	AA	AA	AA	AA	AA
759600	G/A	Unknown	62287162	+	GA	GA	GA	GA	GA	GG	GA	GG	GA	GA	GG	GA	GG	GG	GA	GG	GA	GA	GA	GA	GG	GA	GA	GG	GA	GA	GA	GA	GA	GA	GA	GA	GG	GA	GA	GA	GG	GG	GG	GA	GG	GA	GG	GG	GG
759833	G/A	Unknown	62306251	+	GA	GA	GA	GA	GA	GA	GA	GA	GA	GA	GA	GA	GA	GA	GA	GA	GA	GA	GA	GA	GA	GA	GA	GA	GA	GG	GA	GA	GA	GA	GA	GA	GA	GA	GA	GA	GA	GA	GA	GA	GA	GA	GA	GA	GA
759833	A/T	Unknown	62306257	+	AA	AA	AA	AA	AA	AA	AA	AA	AA	AA	AA	AA	AA	AA	AA	AA	AA	AA	AA	AA	AA	AA	AA	AA	AA	AT	AA	AT	AT	AA	AA	AA	AA	AA	AA	AA	AA	AA	AA	AA	AA	AA	AA	AA	AA
760227	G/C	Unknown	62338545	+	GC	GC	GC	GC	CC	GC	GC	GC	GC	GC	GC	GC	GC	GC	GC	GC	GC	GC	GC	GC	GC	GC	GC	GC	GC	GC	GG	GC	GC	GC	GC	GC	GC	GC	GC	GC	GC	GC	GC	GC	GC	GC	GC	GC	GC
761183	C/A	Unknown	62416930	+	CC	CC	CC	CC	CC	CA	CC	CC	CC	CC	CC	CC	CC	CC	CC	CC	CC	CC	CC	CC	CC	CC	CC	CC	CC	CC	CC	CC	CC	CC	CC	CC	CC	CC	CC	CC	CC	CC	CC	CA	CC	CC	CC	CC	CC
761388	C/T	Unknown	62433742	+	CT	CC	CC	CC	CC	CC	CC	CC	CC	CC	CT	CC	CC	CC	CC	CC	CC	CC	CC	CC	CC	CC	CC	CC	CT	CC	CC	CC	CT	CC	CC	CC	CC	CC	CC	CC	CC	CT	CC	CC	CC	CT	CC	CC	CC
761388	C/T	Unknown	62433771	+	CC	CC	CC	CC	CC	CC	CC	CC	CC	CC	CC	CC	CC	CC	CT	CC	CC	CC	CC	CC	CC	CC	CC	CC	CC	CC	CC	CC	CC	CC	CC	CC	CC	CC	CC	CC	CC	CC	CC	CC	CC	CC	CC	CC	CC
761592	C/G	Unknown	62450476	+	CC	CG	CC	CC	CC	CC	CC	CC	CC	CC	CC	CC	CC	CC	CC	CC	CC	CC	CC	CC	CC	CC	CC	CC	CC	CC	CC	CC	CC	CC	CC	CC	CC	CC	CC	CC	CC	CC	CC	CC	CC	CC	CC	CC	CC
761703	A/C	Unknown	62459621	+	AC	AC	AA	AA	AA	AA	AA	AA	AA	AA	AA	AA	AA	AA	AC	AA	AA	AA	AA	AA	AA	AA	AA	AA	AA	AA	AA	AC	AA	AA	AA	AA	AA	AA	AA	AA	AA	AA	AA	AA	AA	AA	AA	AA	AA
761703	A/G	Unknown	62459626	+	AG	AG	AA	AA	AA	AA	AA	AG	AA	AA	AA	AA	AA	AA	AA	AA	AA	AA	AG	AA	AA	AA	AA	AA	AA	AA	AG	AA	AA	AA	AA	AA	AA	AA	AA	AA	AG	AA	AA	AA	AA	AA	AG	AA	AA
762277	C/A	Unknown	62506658	+	CC	CC	CC	CC	CA	CA	CC	CC	CC	CC	CC	CC	CC	CC	CC	CC	CC	CA	CC	CC	CC	CC	CC	CA	CC	CA	CC	CC	CC	CC	CC	CC	CC	CC	CC	CC	CC	CC	CA	CC	CC	CC	CC	CC	CC
762703	G/A	Unknown	62541576	+	GG	GG	GG	GG	GG	GG	GA	GG	GG	GG	GG	GG	GG	GG	GG	GG	GG	GG	GG	GG	GA	GG	GG	GG	GG	GG	GA	GG	GG	GG	GG	GG	GG	GG	GG	GG	GG	GG	GG	GG	GG	GG	GA	GG	GG
762703	T/G	Unknown	62541593	+	TG	TG	TG	TG	TG	TG	TG	TG	TG	TG	TG	TG	TG	TG	TG	TT	TT	TG	TG	TG	TG	TG	TG	TG	TG	TG	TG	TG	TG	TG	TG	TG	TT	TG	TG	TG	TG	TG	TG	TG	TG	TG	TG	TG	TG
762957	A/G	Unknown	62562413	+	AA	AA	AA	AA	AA	AA	AA	AA	AA	AA	AA	AA	AA	AA	AA	AA	AA	AA	AA	AA	AA	AA	AA	AA	AA	AA	AA	AA	AA	AA	AA	AA	AG	AA	AA	AA	AA	AA	AA	AA	AA	AA	AA	AA	AA
762957	C/T	Unknown	62562434	+	CT	CT	CT	CC	CT	CC	CT	CT	CT	CC	CT	CT	CT	CT	CT	CT	CT	CT	CT	CT	CT	CT	CT	CT	CC	CT	CT	CT	CT	CT	CT	CT	CT	CT	CT	CT	CT	CT	CT	CT	CT	CT	CT	CT	CT
763075	T/G	Unknown	62572093	+	TT	TT	TT	TT	TT	TT	TT	TT	TT	TT	TT	TT	TT	TT	TT	TT	TT	TT	TT	TT	TT	TT	TG	TT	TT	TT	TT	TT	TT	TT	TT	TT	TT	TT	TT	TT	TT	TT	TT	TT	TG	TT	TT	TT	TT
763075	G/T	Unknown	62572111	+	GG	GT	GG	GG	GG	GG	GG	GG	GT	GG	GG	GG	GG	GG	GG	GG	GG	GG	GG	GG	GG	GG	GG	GG	GG	GG	GG	GG	GG	GG	GG	GG	GG	GG	GG	GG	GG	GG	GG	GG	GG	GG	GG	GG	GG
763081	C/T	Unknown	62572594	+	CC	CC	CC	CC	CC	CC	CT	CT	CC	CT	CC	CC	CC	CT	CC	CC	CC	CC	CC	CC	CC	CC	CT	CC	CC	CC	CC	CC	CC	CC	CT	CC	CC	CC	CC	CC	CC	CC	CC	CC	CC	CC	CC	CC	CC
763303	T/G	Unknown	62590790	+	TT	TT	TT	TT	TT	TT	TT	TG	TG	TT	TT	TT	TT	TT	TT	TT	TG	TT	TT	TT	TT	TG	TG	TT	TT	TT	TT	TT	TT	TT	TT	TT	TT	TT	TT	TT	TT	TT	TT	TT	TT	TT	TT	TT	TT
763332	G/A	Unknown	62593153	+	GG	GG	GG	GG	GG	GG	GA	GG	GG	GG	GG	GG	GG	GG	GG	GG	GG	GG	GG	GG	GG	GA	GG	GG	GG	GG	GA	GG	GG	GG	GG	GG	GG	GG	GG	GG	GG	GG	GG	GA	GG	GG	GG	GG	GG
763594	G/A	Unknown	62614644	+	GG	GG	GG	GG	GG	GG	GG	GG	GG	GA	GG	GG	GG	GG	GA	GG	GG	GG	GG	GG	GG	GG	GG	GG	GG	GG	GG	GG	GG	GG	GG	GA	GG	GA	GG	GG	GG	GG	GG	GG	GG	GA	GA	GG	GG
763730	G/A	Unknown	62625800	+	GG	GG	GG	GG	GG	GG	GG	GG	GG	GG	GG	GG	GG	GG	GG	GG	GG	GG	GG	GG	GG	GG	GG	GG	GG	GG	GG	GG	GG	GG	GG	GG	GG	GG	GG	GG	GG	GG	GG	GG	GG	GG	GG	GG	GG
764394	G/A	Unknown	62680253	+	GA	GG	GG	GG	GA	GG	GG	GG	GG	GG	GG	GG	GG	GA	GA	GG	GG	GG	GG	GG	GG	GG	GG	GA	GA	GG	GG	GG	GG	GA	GA	GA	GG	GG	GG	GG	GG	GG	GG	GA	GG	GA	GG	GA	GG
764439	C/T	Unknown	62683938	+	CC	CC	CC	CC	CC	CC	CT	CC	CC	CC	CC	CC	CC	CC	CC	CC	CC	CC	CC	CC	CC	CC	CC	CC	CC	CC	CC	CC	CC	CT	CC	CC	CC	CC	CC	CC	CC	CT	CC	CT	CC	CC	CC	CC	CC
764619	C/T	Unknown	62698688	+	CC	CC	CC	CC	CC	CC	CC	CC	CC	CC	CC	CC	CC	CC	CT	CC	CC	CC	CC	CC	CT	CC	CT	CC	CC	CC	CT	CC	CC	CC	CC	CC	CC	CC	CC	CC	CC	CC	CC	CT	CT	CC	CC	CC	CC
764619	T/C	Unknown	62698731	+	TT	TC	TC	TC	TC	TC	TC	TC	TC	TC	TC	TC	TC	TC	TC	TC	TC	TC	TC	TC	TC	TC	TC	TC	TC	TC	TC	TC	TC	TC	TC	TC	TC	TC	TT	TC	TC	TC	TC	TC	TC	TC	TT	TC	TC
765427	G/A	Unknown	62764944	+	GG	GG	GG	GG	GG	GG	GG	GG	GG	GG	GG	GA	GG	GG	GG	GA	GG	GA	GG	GG	GG	GG	GG	GG	GG	GG	GG	GG	GG	GG	GG	GA	GG	GG	GG	GG	GG	GG	GG	GG	GG	GG	GG	GG	GG
765573	G/A	Unknown	62776932	+	GG	GA	GG	GG	GG	GG	GA	GG	GG	GG	GG	GG	GG	GG	GG	GG	GG	GG	GG	GG	GG	GG	GG	GG	GG	GG	GG	GG	GG	GG	GG	GG	GG	GG	GG	GG	GG	GG	GG	GG	GG	GG	GA	GG	GG
766650	C/T	Unknown	62865228	+	CT	CT	CT	CT	CT	CT	CC	CT	CT	CC	CT	CT	CT	CC	CT	CT	CT	CT	CT	CC	CT	CT	CC	CT	CT	CT	CC	CT	CT	CT	CT	CT	CT	CC	CT	CT	CT	CT	CC	CT	CC	CC	CT	CT	CC
769026	C/T	Unknown	63060079	+	CT	CT	CT	CT	CT	CT	CT	CT	CT	CT	CT	CT	CT	CT	CT	CT	CT	CT	CT	CT	CT	CT	CT	CT	CT	CT	CT	CT	CT	CT	CT	CT	CT	CT	CT	CC	CT	CT	CT	CT	CC	CT	CT	CT	CT
769535	C/G	Unknown	63101826	+	CC	CC	CC	CC	CC	CC	CC	CC	CC	CC	CC	CC	CC	CC	CC	CC	CC	CG	CC	CC	CC	CC	CC	CC	CC	CC	CC	CC	CC	CC	CC	CC	CC	CC	CC	CC	CC	CC	CC	CC	CC	CC	CC	CC	CC
769705	G/A	Unknown	63115738	+	GG	GA	GG	GA	GG	GG	GG	GG	GG	GG	GG	GG	GG	GG	GA	GG	GG	GG	GG	GG	GG	GG	GG	GG	GG	GG	GG	GG	GG	GA	GA	GA	GG	GA	GG	GG	GA	GG	GG	GG	GG	GA	GA	GG	GA
769933	C/T	Unknown	63134431	+	CT	CT	CT	CT	CT	CT	CT	CT	CT	CT	CT	CT	CT	CT	CT	CT	CC	CT	CT	CT	CT	CT	CT	CT	CT	CT	CT	CT	CT	CT	CT	CT	CT	CT	CT	CT	CT	CT	CC	CT	CT	CT	CT	CC	CT
769942	T/C	Unknown	63135211	+	TC	TT	TT	TT	TT	TC	TT	TC	TT	TT	TT	TT	TC	TT	TC	TT	TT	TC	TT	TT	TT	TC	TT	TC	TT	TT	TC	TT	TT	TT	TC	TC	TT	TT	TC	TT	TT	TC	TT	TC	TC	TC	TT	TT	TC
769942	T/C	Unknown	63135216	+	TT	TT	TT	TT	TT	TT	TT	TT	TT	TT	TT	TT	TT	TT	TT	TT	TT	TT	TT	TT	TT	TT	TC	TT	TT	TT	TT	TT	TT	TT	TT	TT	TT	TT	TT	TT	TT	TC	TT	TT	TT	TT	TT	TT	TT
770210	G/A	Unknown	63157157	+	GG	GG	GG	GG	GG	GG	GG	GG	GG	GA	GG	GG	GA	GG	GG	GG	GG	GG	GG	GG	GG	GG	GG	GG	GG	GG	GG	GG	GG	GG	GG	GA	GG	GG	GG	GG	GG	GG	GG	GG	GG	GG	GG	GG	GG
770409	G/T	Unknown	63173472	+	GT	GT	GT	GT	GG	GT	GT	GT	GT	GT	GT	GT	GT	GT	GT	GT	GT	GT	GT	GT	GT	GT	GT	GT	GT	GT	GT	GT	GT	GT	GT	GT	GT	GT	GT	GT	GT	GT	GG	GT	GT	GT	GT	GT	GT
770409	C/G	Unknown	63173490	+	CG	CG	CC	CG	CG	CG	CG	CC	CG	CG	CG	CG	CG	CG	CG	CC	CG	CG	CG	CG	CG	CG	CG	CG	CG	CG	CG	CG	CG	CG	CG	CG	CG	CG	CC	CG	CG	CG	CG	CG	CG	CG	CG	CG	CG
771014	C/G	Unknown	63223086	+	CC	CC	CC	CC	CC	CG	CC	CC	CC	CG	CC	CC	CG	CC	CC	CC	CC	CC	CC	CC	CC	CG	CG	CC	CC	CC	CC	CC	CC	CC	CC	CC	CC	CG	CC	CC	CC	CC	CC	CC	CC	CC	CC	CC	CC
771687	C/A	Unknown	63278285	+	CC	CC	CC	CC	CC	CC	CC	CC	CC	CC	CC	CC	CC	CC	CC	CC	CC	CC	CC	CC	CC	CC	CC	CC	CC	CC	CC	CA	CC	CC	CC	CC	CC	CC	CC	CC	CC	CC	CC	CC	CC	CC	CC	CC	CC
772183	A/C	Unknown	63318978	+	AA	AC	AC	AC	AC	AC	AC	AC	AC	AC	AC	AC	AC	AC	AC	AC	AC	AC	AC	AC	AC	AC	AC	AC	AC	AC	AC	AC	AC	AC	AC	AC	AC	AC	AC	AC	AC	AC	AC	AC	AC	AC	AC	AC	AC
772320	C/T	Unknown	63330166	+	CT	CT	CC	CC	CC	CT	CC	CC	CC	CC	CC	CT	CC	CC	CT	CC	CC	CC	CC	CT	CC	CC	CC	CC	CC	CC	CC	CC	CC	CC	CC	CT	CT	CC	CC	CC	CC	CC	CC	CC	CC	CC	CC	CC	CC
772420	T/C	Unknown	63338373	+	TT	TT	TT	TT	TT	TT	TT	TT	TC	TT	TT	TT	TT	TT	TT	TT	TT	TT	TT	TT	TT	TT	TT	TT	TT	TT	TT	TT	TT	TT	TT	TT	TT	TT	TT	TT	TT	TT	TT	TT	TT	TT	TC	TT	TT
772609	C/A	Unknown	63353889	+	CC	CC	CA	CA	CA	CC	CA	CC	CA	CC	CA	CC	CA	CC	CC	CC	CC	CC	CC	CC	CC	CC	CC	CC	CA	CA	CC	CA	CA	CA	CA	CC	CC	CA	CC	CC	CA	CC	CA	CA	CC	AA	CA	CA	CA
772609	C/G	Unknown	63353891	+	CC	CC	CG	CG	CG	CC	CG	CC	CG	CC	CC	CC	CG	CC	CC	CG	CC	CC	CC	CC	CC	CG	CC	CC	CG	CG	CG	CG	CG	CC	CG	CC	CC	CG	CC	CC	CG	CC	CG	CG	CG	GG	CG	CG	CG
772609	C/G	Unknown	63353903	+	CG	CC	CC	CC	CC	CG	CC	CG	CG	CC	CC	CG	CC	CC	CG	CC	CC	CG	CC	CC	CC	CC	CG	CG	CC	CC	CC	CC	CC	CG	CC	CC	CC	CG	CC	CC	CC	CC	CC	CC	CG	CC	CC	CC	CC
772609	G/C	Unknown	63353906	+	GC	GG	GG	GG	GG	GC	GG	GC	GC	GG	GG	GC	GG	GG	GC	GG	GG	GC	GG	GG	GG	GG	GC	GC	GG	GG	GG	GG	GG	GC	GG	GG	GG	GC	GG	GG	GG	GG	GG	GG	GC	GG	GG	GG	GG
773313	G/C	Unknown	63411604	+	GC	GC	GC	GC	GC	GC	GC	GC	GC	GC	GC	GC	GC	GC	GC	GC	GC	GC	GC	GC	GC	GC	GC	GC	GC	GC	GC	GC	GC	GC	GC	GC	GC	GC	GC	GC	GC	GC	GC	GC	GC	GC	GC	GC	GG
773687	G/A	Unknown	63442285	+	GG	GG	GG	GG	GG	GG	GG	GA	GA	GG	GG	GG	GG	GG	GG	GG	GG	GA	GG	GG	GG	GG	GG	GG	GG	GG	GG	GG	GA	GG	GG	GA	GG	GG	GG	GA	GG	GA	GG	GG	GG	GG	GG	GG	GG
774441	T/C	Unknown	63504120	+	TT	TT	TT	TT	TT	TT	TT	TT	TT	TT	TT	TT	TT	TT	TT	TT	TT	TT	TT	TT	TT	TT	TT	TT	TT	TT	TT	TT	TT	TT	TT	TC	TT	TT	TT	TT	TT	TT	TT	TT	TT	TT	TC	TT	TT
775350	G/A	Unknown	63578644	+	GG	GG	GG	GG	GG	GG	GA	GA	GA	GG	GG	GA	GG	GG	GG	GG	GG	GG	GG	GG	GG	GG	GG	GG	GA	GA	GG	GA	GG	GG	GG	GG	GG	GG	GG	GG	GA	GG	GG	GG	GG	GG	GA	GG	GG
775636	G/A	Unknown	63602087	+	GA	GG	GG	GG	GG	GG	GG	GA	GG	GG	GG	GG	GG	GG	GA	GG	GG	GG	GG	GG	GG	GG	GG	GG	GG	GG	GG	GG	GG	GG	GG	GG	GG	GG	GG	GG	GG	GG	GG	GG	GG	GG	GG	GG	GG
775720	G/C	Unknown	63608980	+	GG	GG	GG	GG	GG	GG	GG	GG	GG	GG	GG	GG	GG	GG	GG	GG	GG	GG	GG	GG	GG	GG	GG	GG	GG	GG	GG	GG	GG	GG	GG	GG	GG	GG	GG	GG	GG	GG	GG	GG	GC	GG	GG	GG	GG
775854	T/C	Unknown	63619988	+	TC	TC	TC	TC	TC	TC	TC	TC	TC	TC	TC	TC	TC	TC	TT	TC	TC	TC	TC	TT	TC	TC	TC	TC	TC	TC	TC	TC	TC	TC	TT	TC	TC	TC	TC	TC	TC	TC	TT	TC	TC	TC	TC	TC	TC
775854	C/G	Unknown	63619995	+	CG	CG	CG	CG	CG	CG	CG	CG	CG	CG	CG	CG	CG	CG	CC	CG	CG	CG	CG	CC	CG	CG	CG	CG	CG	CG	CG	CG	CG	CG	CC	CG	CG	CG	CG	CG	CG	CG	CC	CG	CG	CG	CG	CG	CG
776059	G/A	Unknown	63636765	+	GG	GG	GG	GG	GG	GG	GG	GG	GG	GG	GG	GG	GG	GG	GG	GG	GG	GG	GG	GG	GG	GG	GA	GG	GG	GG	GG	GG	GG	GA	GG	GG	GG	GA	GG	GG	GG	GG	GG	GG	GG	GG	GG	GG	GG
777338	G/A	Unknown	63741677	+	GG	GA	GG	GA	GG	GG	GG	GG	GG	GG	GA	GG	GG	GG	GG	GG	GG	GG	GG	GG	GG	GG	GG	GG	GG	GA	GA	GG	GG	GG	GG	GG	GG	GG	GG	GG	GG	GG	GG	GG	GG	GG	GG	GG	GG
777928	C/T	Unknown	63790067	+	CC	CC	CC	CC	CC	CC	CC	CC	CC	CC	CC	CC	CT	CC	CC	CC	CC	CC	CC	CC	CC	CC	CC	CC	CC	CC	CC	CC	CC	CC	CC	CC	CC	CC	CC	CC	CC	CC	CC	CC	CT	CC	CC	CC	CC
778201	A/C	Unknown	63812426	+	AC	AC	AC	AC	AC	AC	AC	AC	AC	AC	AC	AC	AC	AC	AC	AC	AC	AC	AC	AC	AC	AC	AA	AC	AC	AC	AC	AA	AC	AC	AC	AC	AC	AC	AC	AC	AC	AC	AC	AC	AA	AC	AC	AC	AC
778235	T/G	Unknown	63815197	+	TT	TT	TT	TT	TT	TT	TT	TT	TT	TT	TT	TT	TT	TT	TT	TT	TT	TT	TT	TT	TT	TT	TT	TT	TT	TT	TT	TT	TT	TT	TT	TT	TT	TT	TT	TT	TT	TT	TT	TT	TT	TT	TT	TT	TT
778385	G/A	Unknown	63827507	+	GG	GG	GG	GA	GG	GG	GG	GG	GA	GG	GG	GG	GG	GG	GG	GG	GG	GG	GG	GG	GG	GG	GG	GG	GG	GG	GA	GG	GG	GG	GG	GA	GG	GG	GG	GG	GG	GG	GG	GA	GG	GA	GG	GG	GG
778641	G/A	Unknown	63848491	+	GG	GA	GG	GG	GG	GG	GG	GA	GG	GG	GG	GG	GG	GG	GG	GG	GG	GG	GG	GG	GG	GA	GG	GA	GG	GG	GG	GG	GG	GG	GG	GG	GG	GG	GG	GG	GG	GG	GG	GG	GG	GG	GG	GG	GG
778806	C/G	Unknown	63862019	+	CC	CC	CC	CC	CC	CC	CC	CG	CC	CG	CC	CC	CC	CC	CC	CC	CC	CC	CC	CC	CC	CC	CC	CC	CC	CC	CC	CC	CC	CC	CC	CC	CC	CC	CC	CC	CC	CC	CC	CG	CC	CG	CG	CC	CC
779417	C/T	Unknown	63912151	+	CT	CC	CC	CC	CC	CC	CT	CC	CC	CC	CC	CC	CC	CC	CC	CC	CC	CC	CC	CC	CC	CC	CC	CC	CC	CC	CC	CC	CC	CT	CC	CC	CC	CC	CC	CC	CC	CC	CC	CC	CC	CC	CC	CC	CC
780270	G/A	Unknown	63982095	+	GG	GG	GG	GG	GG	GG	GG	GG	GA	GA	GG	GG	GG	GG	GG	GG	GG	GG	GG	GG	GG	GG	GG	GG	GG	GG	GG	GG	GG	GG	GG	GA	GG	GG	GG	GG	GG	GG	GG	GG	GG	GA	GG	GG	GG
780283	G/A	Unknown	63983150	+	GG	GG	GG	GG	GA	GA	GA	GG	GG	GG	GG	GG	GG	GG	GG	GG	GG	GG	GG	GG	GG	GG	GG	GG	GA	GG	GG	GG	GG	GG	GG	GA	GG	GG	GG	GG	GG	GG	GA	GG	GG	GA	GG	GG	GG
780551	A/G	Unknown	64005112	+	AA	AA	AA	AA	AA	AA	AA	AG	AA	AA	AA	AA	AA	AA	AA	AA	AG	AA	AA	AA	AA	AA	AA	AA	AA	AA	AA	AA	AA	AA	AG	AA	AA	AA	AA	AA	AA	AA	AA	AA	AA	AA	AG	AA	AA
780785	C/T	Unknown	64024356	+	CC	CC	CC	CC	CC	CC	CC	CC	CC	CC	CC	CC	CC	CC	CC	CC	CC	CC	CC	CC	CC	CC	CC	CC	CC	CC	CC	CC	CT	CC	CT	CC	CC	CC	CC	CC	CC	CC	CT	CC	CC	CC	CC	CC	CC
780848	C/T	Unknown	64029474	+	CC	CC	CC	CC	CC	CC	CC	CC	CC	CC	CC	CC	CC	CC	CC	CC	CC	CC	CC	CC	CC	CC	CC	CC	CC	CC	CC	CC	CC	CC	CC	CC	CC	CC	CC	CC	CC	CC	CC	CT	CC	CC	CC	CC	CC
781433	C/T	Unknown	64077448	+	CC	CC	CC	CC	CC	CC	CC	CC	CC	CC	CC	CC	CC	CC	CC	CC	CC	CC	CC	CC	CC	CC	CC	CC	CC	CC	CC	CC	CC	CC	CC	CC	CT	CC	CC	CC	CC	CC	CC	CC	CC	CT	CC	CC	CC
782142	G/A	Unknown	64135623	+	GG	GG	GG	GG	GG	GG	GG	GG	GG	GA	GG	GG	GG	GG	GG	GG	GG	GG	GG	GG	GG	GG	GA	GG	GG	GG	GG	GG	GG	GG	GG	GG	GG	GG	GG	GG	GG	GG	GG	GG	GA	GG	GG	GG	GA
782274	C/A	Unknown	64146409	+	CC	CA	CA	CC	CA	CC	CC	CC	CC	CA	CA	CA	CA	CA	CC	CC	CA	CC	CA	CA	CA	CA	CA	CC	CC	CA	CC	CA	CA	CC	CC	CC	CA	CA	CA	CC	CA	CC	CA	CA	CC	CC	CC	CA	CA
782568	G/C	Unknown	64170550	+	GG	GG	GC	GG	GG	GG	GG	GG	GG	GG	GG	GG	GG	GG	GG	GC	GG	GG	GG	GG	GG	GG	GG	GC	GG	GG	GG	GC	GG	GG	GG	GG	GG	GG	GG	GG	GG	GG	GG	GC	GG	GG	GG	GC	GC
782661	C/G	Unknown	64178158	+	CC	CC	CC	CC	CC	CC	CC	CC	CC	CC	CC	CC	CC	CC	CC	CC	CC	CC	CC	CC	CC	CC	CC	CC	CC	CG	CC	CC	CC	CC	CC	CC	CC	CC	CC	CC	CC	CC	CC	CC	CC	CC	CC	CC	CC
783155	G/A	Unknown	64218643	+	GG	GG	GG	GG	GG	GG	GA	GG	GG	GG	GG	GG	GG	GG	GG	GG	GG	GG	GG	GG	GG	GG	GG	GG	GG	GG	GG	GG	GG	GG	GG	GG	GG	GG	GG	GG	GG	GG	GG	GG	GA	GG	GG	GG	GG
785516	A/G	Unknown	64412238	+	AA	AA	AA	AA	AG	AA	AA	AA	AG	AA	AA	AA	AA	AA	AA	AA	AA	AA	AA	AA	AA	AA	AA	AA	AA	AA	AA	AA	AA	AA	AA	AA	AA	AA	AA	AA	AA	AA	AA	AA	AA	AA	AA	AA	AA
785516	A/C	Unknown	64412269	+	AA	AA	AA	AA	AC	AA	AA	AA	AC	AA	AA	AA	AA	AA	AA	AA	AA	AA	AA	AA	AA	AA	AA	AA	AA	AA	AA	AA	AA	AA	AA	AA	AA	AA	AA	AA	AA	AA	AA	AA	AA	AA	AA	AA	AA
786793	C/T	Unknown	64516952	+	CC	CC	CC	CC	CC	CC	CC	CC	CC	CC	CC	CC	CC	CC	CC	CC	CC	CC	CC	CC	CC	CC	CC	CC	CC	CC	CC	CC	CT	CC	CC	CC	CC	CC	CC	CC	CC	CC	CC	CC	CC	CC	CC	CC	CC
786897	G/A	Unknown	64525486	+	GG	GG	GG	GG	GG	GG	GG	GG	GG	GG	GG	GG	GG	GG	GG	GG	GG	GG	GG	GG	GG	GG	GG	GG	GG	GG	GG	GG	GG	GG	GG	GG	GG	GG	GG	GG	GG	GG	GG	GG	GA	GA	GG	GG	GG
787016	A/G	Unknown	64535244	+	AG	AG	AG	AG	AG	AG	AG	AG	AG	AG	AA	AG	AG	AA	AG	AG	AG	AG	AG	AG	AG	AG	AG	AG	AG	AG	AG	AG	AG	AG	AG	AG	AG	AG	AG	AG	AG	AG	AG	AG	AG	AG	AG	AG	AG
787152	C/T	Unknown	64546423	+	CC	CC	CC	CC	CC	CC	CC	CC	CC	CC	CC	CC	CC	CC	CT	CC	CC	CC	CC	CC	CC	CC	CC	CC	CC	CC	CC	CC	CC	CC	CC	CT	CC	CC	CC	CC	CC	CC	CC	CC	CT	CT	CC	CC	CC
787752	G/A	Unknown	64595616	+	GG	GG	GG	GG	GA	GG	GG	GG	GG	GG	GG	GG	GG	GG	GG	GG	GG	GA	GG	GG	GG	GG	GA	GA	GA	GG	GG	GG	GG	GG	GG	GG	GA	GG	GG	GG	GG	GA	GG	GG	GG	GG	GG	GG	GG
788083	T/A	Unknown	64622762	+	TA	TT	TA	TT	TA	TA	TT	TA	TT	TT	TA	TA	TA	TA	TT	TA	TT	TA	TT	TT	TT	TA	TA	TA	TA	TT	AA	TT	TT	TA	TT	TA	TT	TA	TA	TT	TA	TA	TA	TT	TA	TA	TA	TT	TA
788300	C/A	Unknown	64640566	+	CC	CC	CC	CC	CC	CC	CC	CC	CC	CA	CC	CA	CC	CC	CC	CC	CC	CC	CC	CC	CC	CC	CC	CC	CC	CC	CC	CA	CC	CC	CC	CC	CC	CC	CC	CC	CC	CC	CA	CC	CC	CC	CC	CC	CC
788649	G/A	Unknown	64669166	+	GG	GG	GG	GG	GA	GG	GA	GG	GG	GG	GG	GG	GG	GG	GA	GA	GG	GG	GG	GG	GG	GG	GG	GG	GG	GG	GG	GG	GG	GG	GA	GG	GG	GG	GG	GG	GG	GG	GG	GG	GG	GG	GG	GG	GG
788693	C/G	Unknown	64672767	+	GC	GC	GC	GC	GC	GC	GC	GC	GC	GC	GC	GC	GG	GC	GC	GC	GC	GC	GC	GC	GC	GC	GC	GC	GC	GC	GC	GC	GC	GC	GC	GC	GC	GC	GC	GC	GC	GC	GC	GC	GC	GC	GC	GC	GC
789051	G/T	Unknown	64702135	+	GT	GG	GG	GG	GT	GG	GT	GG	GG	GT	GG	GG	GG	GG	GT	GG	GT	GG	GG	GG	GG	GG	GG	GG	GG	GG	GG	GG	GT	GT	GT	GG	GT	GG	GG	GG	GG	GT	GG	GG	GT	GG	GG	GG	GG
789051	A/G	Unknown	64702145	+	AA	AA	AA	AA	AA	AA	AA	AA	AG	AA	AA	AA	AA	AA	AA	AA	AA	AA	AA	AA	AA	AA	AG	AA	AA	AA	AG	AA	AA	AA	AA	AA	AA	AA	AA	AA	AA	AA	AA	AA	AA	AA	AA	AA	AA
789138	C/A	Unknown	64709269	+	CA	CA	CA	CA	CA	CA	CA	CA	CA	CA	CA	CA	CA	CA	CA	CA	CA	CA	CA	CA	CA	CA	CA	CA	CA	CA	CA	CA	CA	CA	CA	CA	CA	CA	CC	CA	CA	CA	CA	CA	CA	CA	CA	CA	CA
789436	G/T	Unknown	64733713	+	GT	GG	GG	GG	GG	GT	GG	GG	GG	GG	GG	GG	GG	GG	GG	GG	GG	GG	GG	GG	GG	GG	GT	GG	GG	GG	GG	GG	GG	GG	GG	GG	GG	GG	GG	GG	GG	GG	GG	GT	GG	GG	GG	GG	GG
789478	G/A	Unknown	64737121	+	GG	GG	GA	GG	GG	GG	GA	GG	GG	GG	GG	GG	GG	GG	GG	GG	GG	GG	GG	GG	GG	GG	GA	GG	GG	GG	GG	GG	GG	GG	GG	GG	GG	GG	GG	GG	GG	GG	GA	GG	GG	GG	GG	GG	GG
789478	T/C	Unknown	64737157	+	TT	TT	TT	TT	TT	TT	TT	TT	TC	TC	TT	TT	TT	TT	TT	TT	TT	TT	TT	TT	TT	TT	TT	TC	TT	TT	TT	TT	TT	TT	TT	TT	TT	TT	TT	TT	TT	TT	TT	TT	TT	TT	TC	TT	TT
790228	C/T	Unknown	64798635	+	CC	CC	CC	CC	CC	CT	CC	CC	CC	CC	CC	CC	CC	CC	CC	CC	CC	CC	CC	CC	CC	CC	CC	CC	CT	CC	CC	CC	CC	CC	CC	CC	CC	CC	CC	CC	CC	CC	CC	CC	CC	CC	CC	CC	CC
790607	T/C	Unknown	64829699	+	TC	TT	TT	TT	TT	TT	TT	TT	TT	TT	TT	TT	TT	TT	TT	TT	TT	TT	TT	TT	TT	TT	TT	TT	TC	TT	TT	TT	TT	TT	TT	TT	TT	TT	TT	TT	TT	TT	TT	TC	TT	TT	TT	TT	TT
791619	G/T	Unknown	64912717	+	GG	GT	GG	GG	GG	GG	GG	GG	GG	GG	GT	GT	GG	GG	GG	GG	GG	GG	GG	GG	GG	GG	GG	GT	GG	GG	GT	GG	GG	GG	GG	GT	GG	GG	GG	GG	GG	GG	GG	GG	GG	GT	GG	GG	GG
791760	C/T	Unknown	64924268	+	CT	CC	CC	CC	CC	CC	CC	CC	CC	CC	CC	CC	CC	CC	CT	CC	CC	CT	CC	CC	CC	CC	CC	CC	CT	CC	CC	CC	CC	CC	CC	CC	CC	CC	CC	CC	CC	CC	CC	CC	CC	CC	CC	CC	CC
792294	C/A	Unknown	64968094	+	CC	CC	CC	CC	CC	CC	CC	CC	CC	CC	CC	CC	CC	CC	CC	CC	CC	CC	CC	CA	CC	CC	CC	CC	CC	CC	CC	CA	CC	CC	CA	CC	CC	CC	CC	CC	CC	CC	CC	CA	CC	CC	CC	CC	CC
792558	G/A	Unknown	64989689	+	GG	GG	GG	GG	GG	GG	GG	GG	GA	GG	GG	GG	GG	GG	GG	GG	GG	GG	GG	GG	GG	GG	GG	GG	GG	GG	GG	GG	GG	GG	GG	GG	GG	GG	GG	GG	GG	GG	GG	GG	GG	GG	GG	GG	GG
792714	C/G	Unknown	65002478	+	CC	CC	CC	CC	CC	CC	CC	CC	CC	CC	CC	CC	CC	CC	CC	CC	CC	CG	CC	CC	CC	CC	CC	CC	CC	CC	CC	CC	CG	CC	CG	CC	CC	CC	CC	CC	CC	CC	CC	CC	CG	CC	CC	CC	CC
793423	C/G	Unknown	65060613	+	CC	CG	CG	CG	CC	CC	CC	CC	CC	CC	CG	CC	CC	CC	CC	CC	CC	CC	CC	CC	CC	CC	CC	CC	CC	CC	CC	CC	CC	CC	CC	CC	CC	CC	CC	CC	CC	CC	CC	CC	CC	CG	CC	CC	CC
793475	T/C	Unknown	65064893	+	TT	TT	TT	TC	TT	TT	TT	TT	TT	TT	TT	TC	TT	TT	TT	TT	TT	TC	TT	TT	TT	TT	TT	TT	TT	TT	TT	TC	TT	TT	TT	TT	TT	TT	TT	TT	TT	TT	TC	TT	TT	TT	TT	TT	TC
793523	C/A	Unknown	65068850	+	CC	CA	CA	CA	CC	CC	CA	CC	CC	CC	CC	CA	CA	CA	CA	CC	CA	CA	CA	CC	CA	CA	CA	CC	CC	CA	CC	CC	CA	CC	CC	CA	CC	CA	CA	CA	CA	CA	CC	CC	CA	CC	CC	CA	CC
793736	G/A	Unknown	65086314	+	GG	GG	GG	GG	GG	GG	GG	GG	GA	GG	GG	GG	GG	GG	GG	GG	GG	GG	GG	GG	GG	GG	GG	GG	GA	GG	GG	GG	GA	GG	GG	GG	GG	GG	GG	GG	GG	GG	GG	GG	GG	GG	GG	GG	GA
794104	C/A	Unknown	65116499	+	CC	CC	CC	CC	CC	CC	CC	CC	CC	CC	CC	CC	CC	CC	CC	CC	CC	CC	CC	CC	CC	CC	CC	CC	CA	CC	CC	CC	CC	CC	CC	CC	CC	CC	CC	CC	CC	CC	CC	CC	CC	CC	CC	CC	CC
794336	C/T	Unknown	65135502	+	CT	CT	CT	CT	CT	CT	CT	CT	CT	CT	CT	CT	CT	CT	CT	CT	CT	CT	CT	CT	CT	CT	CT	CT	CT	CT	CT	CT	CT	CT	CT	CT	CT	CT	CT	CT	CT	CT	CT	CT	CT	CT	CT	CT	CT
794338	C/G	Unknown	65135656	+	CC	CG	CC	CC	CC	CC	CG	CG	CC	CC	CC	CC	CC	CC	CC	CC	CC	CC	CC	CC	CC	CC	CC	CC	CG	CC	CC	CC	CC	CC	CC	CG	CC	CC	CC	CC	CC	CG	CC	CC	CC	CC	CG	CC	CC
794620	G/A	Unknown	65158769	+	GG	GG	GG	GG	GG	GG	GG	GA	GA	GG	GG	GG	GG	GG	GG	GG	GG	GG	GG	GG	GG	GG	GG	GG	GG	GG	GG	GG	GG	GG	GA	GG	GG	GG	GG	GG	GG	GG	GG	GG	GG	GG	GG	GG	GG
795889	G/C	Unknown	65262849	+	GG	GG	GG	GG	GG	GG	GG	GC	GG	GG	GG	GG	GG	GG	GG	GG	GG	GG	GG	GG	GG	GC	GG	GG	GG	GG	GG	GG	GG	GG	GG	GG	GG	GG	GG	GG	GG	GG	GG	GG	GG	GG	GG	GG	GG
796051	C/T	Unknown	65276133	+	CC	CC	CC	CT	CC	CC	CC	CC	CT	CC	CT	CC	CC	CC	CC	CC	CC	CC	CC	CC	CC	CC	CC	CC	CC	CC	CC	CC	CC	CC	CC	CC	CT	CC	CC	CC	CC	CC	CC	CC	CC	CC	CC	CC	CC
796586	G/A	Unknown	65319985	+	GG	GG	GG	GG	GG	GG	GG	GG	GG	GG	GA	GG	GG	GG	GG	GG	GG	GA	GG	GG	GG	GG	GG	GG	GG	GG	GG	GG	GG	GG	GG	GA	GG	GG	GG	GG	GG	GG	GG	GG	GG	GG	GG	GG	GG
796586	A/T	Unknown	65320003	+	AA	AA	AA	AA	AA	AA	AA	AA	AA	AA	AT	AA	AA	AA	AA	AA	AA	AT	AA	AA	AA	AA	AA	AA	AA	AA	AA	AA	AA	AA	AA	AT	AA	AA	AA	AA	AA	AA	AA	AA	AA	AA	AA	AA	AA
796649	T/C	Unknown	65325162	+	TT	TT	TT	TT	TC	TT	TC	TC	TT	TT	TT	TT	TT	TT	TT	TC	TT	TT	TT	TT	TT	TT	TT	TT	TC	TT	TT	TT	TT	TT	TT	TT	TT	TT	TT	TT	TT	TC	TT	TT	TT	TT	TT	TT	TT
796886	G/C	Unknown	65344581	+	GG	GG	GG	GG	GG	GG	GG	GG	GG	GG	GC	GG	GG	GG	GG	GG	GC	GG	GG	GG	GG	GG	GG	GC	GG	GC	GG	GG	GG	GG	GG	GG	GG	GG	GG	GG	GG	GC	GG	GG	GG	GC	GG	GG	GG
797368	G/A	Unknown	65384105	+	GG	GG	GG	GG	GG	GG	GG	GG	GG	GG	GG	GG	GG	GG	GG	GG	GG	GG	GG	GG	GG	GG	GG	GG	GA	GG	GG	GG	GG	GA	GG	GG	GG	GG	GG	GG	GG	GG	GG	GG	GA	GG	GG	GG	GG
797840	A/C	Unknown	65422831	+	AA	AA	AA	AA	AA	AA	AA	AA	AA	AA	AA	AC	AA	AA	AA	AA	AA	AA	AA	AA	AC	AA	AA	AA	AA	AA	AA	AA	AA	AA	AC	AA	AA	AA	AC	AA	AA	AA	AC	AA	AA	AA	AA	AA	AA
798613	G/A	Unknown	65486207	+	GG	GG	GG	GG	GG	GG	GG	GG	GA	GG	GG	GG	GG	GG	GG	GG	GG	GG	GG	GG	GG	GG	GG	GG	GG	GG	GG	GG	GG	GG	GG	GG	GG	GG	GG	GG	GG	GG	GG	GG	GG	GG	GG	GG	GG
798933	T/C	Unknown	65512459	+	TC	TC	TC	TC	TC	TC	TT	TC	TC	TC	TC	TC	TC	TC	TC	TC	CC	TC	TC	TC	TC	TC	TC	TT	TC	TT	TC	TC	TC	TC	TC	TT	TC	TT	TC	TC	TC	TC	TC	TC	TC	TC	TC	TC	TC
799192	G/T	Unknown	65533703	+	GT	GT	GG	GT	GG	GT	GG	GT	GG	GT	GT	GT	GT	GG	GG	GT	GT	GG	GG	GG	GT	GG	GG	GT	GG	GG	GG	GG	GT	GT	GG	GG	GT	GT	GT	GG	GT	GT	GT	GT	GT	GT	GT	GT	GG
799474	C/T	Unknown	65556809	+	CC	CC	CC	CC	CT	CC	CC	CC	CC	CC	CC	CC	CC	CC	CC	CC	CC	CC	CC	CC	CC	CC	CC	CC	CT	CC	CT	CT	CC	CC	CT	CC	CC	CC	CC	CC	CC	CC	CC	CC	CC	CT	CC	CC	CC
799814	C/T	Unknown	65584698	+	CC	CC	CC	CC	CC	CT	CT	CC	CT	CC	CC	CC	CT	CC	CC	CT	CC	CC	CC	CC	CT	CC	CC	CC	CT	CC	CC	CC	CT	CC	CC	CT	CC	CT	CC	CC	CC	CC	CC	CT	CC	CT	CT	CC	CC
800064	C/A	Unknown	65605195	+	CC	CC	CC	CA	CC	CC	CC	CC	CC	CC	CC	CC	CC	CC	CC	CC	CA	CC	CC	CC	CC	CC	CC	CC	CC	CC	CC	CC	CC	CA	CC	CC	CC	CC	CC	CC	CC	CC	CC	CC	CA	CC	CA	CC	CC
800574	G/A	Unknown	65647002	+	GG	GG	GG	GG	GG	GG	GG	GG	GG	GG	GG	GG	GG	GG	GG	GG	GG	GG	GG	GG	GG	GG	GA	GA	GG	GA	GG	GG	GG	GG	GG	GG	GG	GG	GG	GG	GG	GG	GG	GG	GG	GG	GA	GG	GG
801140	C/G	Unknown	65693481	+	CC	CC	CC	CC	CC	CC	CC	CG	CG	CC	CC	CC	CC	CC	CC	CC	CC	CC	CC	CC	CC	CC	CC	CC	CC	CC	CC	CC	CC	CC	CC	CC	CC	CC	CC	CC	CC	CC	CC	CC	CC	CC	CC	CC	CC
801229	A/G	Unknown	65700721	+	AG	AG	AG	AG	AG	AG	AG	AG	AG	AG	AG	AG	AG	AG	AG	AG	AG	AG	AG	AG	AG	AG	AG	AA	AG	AG	AG	AG	AG	AG	AG	AG	AG	AG	AG	AG	AA	AG	AG	AG	AG	AG	AG	AG	AG
801243	C/T	Unknown	65701868	+	CC	CC	CC	CC	CC	CC	CC	CC	CC	CC	CC	CC	CC	CC	CC	CC	CC	CC	CC	CC	CC	CC	CC	CC	CC	CT	CC	CC	CC	CC	CC	CC	CC	CC	CC	CC	CC	CC	CC	CC	CT	CC	CC	CC	CC
802150	C/A	Unknown	65776276	+	CA	CC	CC	CC	CC	CA	CC	CC	CC	CC	CC	CA	CC	CA	CC	CA	CC	CC	CA	CC	CC	CC	CC	CC	CC	CC	CC	CC	CC	CC	CC	CA	CA	CA	CA	CA	CC	CC	CC	CC	CC	CC	CC	CA	CC
803368	C/T	Unknown	65876116	+	CC	CC	CC	CC	CC	CC	CC	CC	CT	CC	CC	CC	CC	CC	CC	CC	CC	CC	CC	CT	CC	CC	CC	CC	CC	CC	CC	CT	CC	CC	CT	CT	CC	CC	CC	CC	CC	CC	CC	CC	CC	CC	CT	CC	CC
803376	T/C	Unknown	65876758	+	TT	TT	TT	TT	TT	TT	TT	TT	TT	TT	TT	TT	TT	TT	TT	TT	TT	TT	TT	TT	TT	TT	TC	TT	TT	TT	TC	TT	TT	TT	TT	TT	TT	TC	TT	TT	TT	TT	TT	TT	TT	TT	TT	TT	TT
804244	G/C	Unknown	65947942	+	GG	GG	GC	GG	GG	GG	GG	GG	GG	GG	GG	GG	GG	GG	GG	GG	GC	GG	GG	GG	GG	GG	GG	GG	GG	GG	GG	GG	GG	GG	GG	GG	GG	GG	GG	GG	GG	GC	GG	GC	GG	GG	GG	GG	GG
804244	C/A	Unknown	65947970	+	CA	CC	CA	CA	CC	CA	CA	CC	CC	CA	CA	CA	CC	CA	CC	CA	CA	CA	CA	CA	CC	CA	CA	CA	CC	CA	CA	CA	CA	CC	CA	CA	CA	CC	CA	CA	CA	CA	CA	CA	CA	CA	CA	CA	CA
804731	C/T	Unknown	65987882	+	CT	CC	CC	CC	CC	CC	CC	CC	CC	CT	CC	CC	CC	CC	CC	CC	CC	CC	CC	CC	CC	CT	CC	CC	CC	CC	CC	CC	CC	CC	CC	CC	CC	CC	CC	CC	CC	CC	CC	CC	CC	CC	CC	CC	CC
805333	C/A	Unknown	66037262	+	CC	CC	CC	CC	CC	CC	CC	CC	CC	CC	CC	CC	CC	CC	CC	CC	CC	CC	CC	CC	CC	CC	CC	CC	CA	CC	CC	CC	CC	CC	CC	CC	CC	CC	CC	CC	CC	CC	CC	CC	CC	CC	CC	CC	CC
806117	C/G	Unknown	66101566	+	CC	CG	CG	CG	CG	CG	CG	CG	CG	CG	CG	CG	CG	CG	CG	CG	CG	CG	CG	CG	CG	CG	CG	CG	CG	CG	CC	CG	CG	CG	CG	CG	CG	CG	CG	CG	CG	CG	CG	CG	CG	CG	CG	CG	CG
806283	C/T	Unknown	66115147	+	CC	CC	CC	CC	CC	CC	CT	CC	CC	CC	CC	CC	CC	CC	CC	CC	CC	CC	CC	CC	CC	CC	CC	CC	CC	CC	CC	CT	CC	CC	CC	CC	CC	CC	CC	CC	CC	CC	CC	CC	CC	CC	CC	CC	CC
806459	G/A	Unknown	66129588	+	GG	GG	GA	GG	GG	GG	GG	GG	GA	GG	GG	GG	GG	GG	GG	GG	GG	GG	GG	GG	GG	GG	GA	GG	GG	GG	GG	GG	GG	GG	GA	GG	GG	GA	GA	GG	GG	GG	GG	GG	GG	GG	GG	GG	GG
806459	C/A	Unknown	66129596	+	CA	CC	CC	CC	CA	CC	CC	CC	CA	CC	CC	CC	CC	CC	CC	CC	CC	CC	CC	CC	CC	CC	CA	CC	CC	CC	CC	CC	CC	CC	CA	CC	CA	CA	CC	CC	CC	CC	CC	CC	CC	CC	CC	CC	CC
806647	C/G	Unknown	66145018	+	CG	CG	CG	CC	CG	CG	CG	CC	CC	CG	CG	CG	CG	CG	CG	CG	CC	CG	CG	CG	CG	CG	CG	CC	CC	CG	CG	CC	CG	CC	CC	CC	CG	CG	CG	CG	CC	CG	CG	CG	CG	CG	CC	CG	CG
806684	T/C	Unknown	66148035	+	TC	TC	TC	TC	TC	TC	TC	TC	TC	TC	TC	TC	TC	TC	TC	TC	TC	TT	TC	TC	TC	TC	TC	TC	TC	TC	TC	TC	TC	TC	TC	TC	TC	TC	TC	TC	TC	TT	TC	TC	TC	TC	TC	TC	TC
807129	A/G	Unknown	66184512	+	AG	AA	AA	AA	AA	AA	AG	AG	AA	AA	AA	AA	AA	AA	AA	AA	AA	AA	AA	AA	AA	AG	AA	AA	AA	AA	AA	AA	AA	AG	AA	AA	AA	AA	AA	AA	AA	AG	AG	AA	AA	AA	AG	AA	AA
808419	C/T	Unknown	66290302	+	CC	CC	CC	CC	CC	CC	CC	CC	CC	CC	CC	CC	CC	CC	CC	CC	CT	CC	CC	CC	CC	CC	CC	CC	CC	CC	CC	CC	CC	CC	CC	CC	CC	CC	CC	CC	CC	CC	CC	CC	CC	CC	CC	CC	CC
808872	G/A	Unknown	66327429	+	GG	GG	GG	GA	GG	GA	GG	GG	GG	GG	GA	GG	GG	GG	GG	GG	GG	GG	GG	GG	GG	GG	GA	GG	GG	GG	GG	GG	GG	GA	GG	GG	GG	GG	GG	GG	GG	GG	GG	GG	GG	GG	GA	GG	GG
809710	A/T	Unknown	66396141	+	AA	AA	AA	AA	AA	AA	AA	AT	AA	AA	AA	AA	AT	AA	AA	AA	AA	AA	AA	AA	AA	AA	AA	AA	AA	AA	AT	AA	AA	AA	AA	AA	AA	AA	AA	AA	AA	AA	AA	AA	AA	AA	AA	AA	AA
810244	A/G	Unknown	66439949	+	AA	AA	AA	AA	AA	AG	AG	AA	AA	AA	AA	AA	AA	AA	AG	AA	AG	AA	AA	AA	AA	AA	AG	AA	AG	AA	AA	AA	AG	AA	AA	AA	AA	AA	AA	AA	AA	AA	AA	AA	AG	AG	AG	AG	AG
810244	C/G	Unknown	66440007	+	CC	CC	CC	CC	CC	CC	CC	CC	CC	CC	CC	CC	CC	CC	CC	CG	CC	CC	CG	CC	CC	CC	CC	CC	CC	CC	CC	CC	CC	CC	CC	CC	CC	CC	CC	CC	CC	CC	CC	CC	CC	CC	CC	CC	CC
810754	G/A	Unknown	66481785	+	GA	GA	GA	GG	AA	GG	GA	GA	GA	GA	GA	GA	GA	GA	GA	AA	GA	GA	GA	GA	GA	GG	GA	GA	GA	GA	GA	GA	AA	GA	GA	GA	GA	GA	GA	GA	GA	GA	GA	GG	GA	GA	GA	GA	GA
810887	C/G	Unknown	66492678	+	CG	CG	CG	CG	CC	CG	CC	CG	CC	CC	CG	CG	CG	CG	CG	CG	CC	CC	CG	CG	CC	CG	CG	CC	CG	CC	CC	CG	CG	CG	CC	CG	CG	CC	CG	CG	CG	CC	CC	CC	CG	CC	CC	CG	CG
811006	C/T	Unknown	66502424	+	CC	CC	CC	CC	CC	CC	CC	CC	CC	CC	CC	CC	CC	CC	CC	CC	CC	CC	CC	CC	CC	CC	CC	CC	CC	CC	CC	CC	CC	CC	CC	CC	CC	CC	CC	CC	CC	CC	CC	CC	CC	CC	CC	CC	CC
811280	T/C	Unknown	66524900	+	TT	TT	TT	TT	TT	TT	TT	TT	TT	TT	TT	TT	TT	TT	TT	TT	TT	TT	TT	TT	TT	TC	TT	TT	TC	TT	TT	TT	TT	TT	TT	TT	TT	TT	TT	TT	TT	TT	TT	TT	TT	TT	TT	TT	TT
811294	C/T	Unknown	66526040	+	CC	CC	CC	CC	CC	CT	CC	CC	CC	CC	CC	CC	CC	CC	CT	CC	CC	CC	CC	CC	CC	CC	CC	CC	CC	CT	CC	CC	CC	CC	CC	CC	CC	CT	CC	CC	CC	CT	CC	CC	CC	CT	CT	CC	CC
811394	A/C	Unknown	66534233	+	AA	AA	AA	AA	AC	AA	AA	AA	AA	AA	AA	AA	AA	AA	AA	AA	AA	AA	AA	AC	AA	AA	AA	AA	AA	AA	AA	AA	AA	AA	AA	AA	AA	AA	AA	AA	AA	AA	AA	AA	AA	AA	AA	AA	AA
811767	C/T	Unknown	66564846	+	CC	CT	CT	CT	CT	CT	CT	CC	CT	CT	CC	CT	CT	CC	CT	CT	CC	CT	CT	CT	CT	CT	CT	CT	CT	CT	CC	CC	CT	CT	CT	CT	CT	CT	CT	CT	CC	CT	CT	CC	CT	CT	CC	CT	CT
811882	A/T	Unknown	66574288	+	AT	AT	AT	AT	AT	AT	AT	AT	AT	AT	AT	AA	AT	AT	AT	AT	AT	AT	AT	AT	AT	AT	AT	AT	AT	AT	AT	AT	AA	AT	AT	AT	AT	AT	AT	AT	AT	AT	AT	AT	AT	AT	AT	AT	AT
812098	C/T	Unknown	66592021	+	CC	CC	CC	CC	CC	CC	CC	CC	CC	CC	CC	CC	CC	CC	CC	CC	CC	CC	CC	CC	CC	CC	CC	CC	CC	CC	CT	CC	CC	CC	CC	CC	CC	CC	CC	CC	CC	CC	CC	CC	CC	CT	CC	CC	CC
812267	C/T	Unknown	66605826	+	CC	CC	CC	CC	CC	CC	CC	CC	CC	CT	CT	CC	CC	CC	CC	CC	CC	CC	CC	CC	CC	CC	CC	CC	CT	CC	CC	CC	CC	CC	CC	CC	CC	CT	CC	CC	CC	CC	CC	CC	CC	CC	CC	CC	CC
813133	C/T	Unknown	66676856	+	TT	CT	CT	CT	CT	CT	CT	CT	CT	CT	CT	CT	CT	CT	CC	CT	CT	CT	CT	CT	CT	CT	CT	CT	CT	CT	CC	CT	CT	CT	CT	CT	CT	CT	CT	CT	CC	CT	CT	CT	CT	CC	CT	CT	CT
814169	C/T	Unknown	66761795	+	CC	CC	CC	CC	CT	CT	CC	CC	CC	CC	CC	CC	CC	CC	CC	CC	CC	CC	CC	CC	CC	CC	CC	CC	CC	CC	CC	CC	CC	CT	CC	CC	CC	CC	CC	CC	CC	CT	CT	CC	CC	CT	CC	CC	CC
814330	T/G	Unknown	66775007	+	TT	TT	TG	TG	TT	TT	TT	TT	TG	TT	TT	TT	TT	TT	TT	TT	TT	TT	TT	TT	TT	TT	TT	TT	TT	TT	TT	TT	TG	TT	TG	TT	TT	TT	TT	TT	TT	TT	TT	TT	TT	TT	TT	TT	TT
814516	A/C	Unknown	66790260	+	AC	AC	AC	AC	AC	AC	AC	AC	AA	AC	AA	AC	AC	AA	AC	AC	AC	AC	AC	AC	AC	AC	AC	AC	AC	AC	AC	AA	AA	AA	AC	AC	AA	AC	AA	AC	AA	AC	AC	AC	AC	AC	AC	AC	AC
814757	C/G	Unknown	66810014	+	CG	CC	CC	CC	CC	CC	CC	CC	CC	CC	CC	CC	CC	CC	CC	CC	CC	CC	CC	CC	CC	CC	CC	CG	CC	CG	CC	CC	CG	CC	CG	CC	CG	CG	CC	CC	CC	CC	CC	CC	CC	CG	CG	CC	CG
814804	C/G	Unknown	66813855	+	CC	CC	CC	CC	CC	CC	CC	CC	CC	CC	CC	CC	CC	CG	CC	CC	CC	CC	CC	CC	CC	CC	CC	CC	CC	CC	CC	CC	CC	CC	CC	CC	CC	CC	CC	CC	CC	CC	CC	CC	CC	CC	CC	CC	CC
814804	G/A	Unknown	66813864	+	GG	GG	GG	GG	GG	GG	GG	GG	GG	GG	GG	GG	GA	GA	GG	GG	GG	GG	GG	GG	GG	GG	GG	GG	GG	GG	GG	GA	GG	GG	GG	GG	GG	GG	GG	GG	GG	GG	GG	GG	GG	GG	GG	GG	GG
815853	G/A	Unknown	66899871	+	GG	GG	GG	GG	GG	GG	GG	GG	GG	GG	GG	GG	GG	GG	GG	GG	GG	GG	GG	GG	GG	GG	GA	GG	GA	GG	GA	GG	GG	GG	GG	GA	GG	GG	GG	GG	GG	GA	GG	GA	GG	GG	GG	GG	GG
816299	C/G	Unknown	66936444	+	CC	CC	CC	CC	CC	CC	CC	CC	CC	CC	CC	CC	CC	CC	CG	CC	CC	CC	CC	CC	CC	CC	CC	CC	CC	CC	CG	CG	CC	CC	CC	CC	CC	CC	CC	CC	CC	CC	CC	CC	CC	CC	CC	CC	CC
816526	C/T	Unknown	66955099	+	CC	CC	CC	CC	CC	CC	CC	CC	CC	CC	CC	CC	CC	CC	CC	CC	CC	CC	CC	CC	CC	CC	CC	CT	CC	CC	CC	CC	CC	CC	CC	CC	CC	CC	CC	CC	CT	CC	CC	CT	CT	CT	CC	CC	CC
816638	C/T	Unknown	66964276	+	CT	CT	CT	CT	CT	CT	CT	CC	CT	CT	CT	CT	CT	CT	CT	CT	CT	CT	CT	CT	CT	CT	CT	CC	CT	CT	CT	CT	CT	CT	CT	CT	CT	CT	CT	CC	CT	CT	CT	CT	CT	CT	CT	CT	CT
816890	C/T	Unknown	66984921	+	CC	CT	CC	CC	CC	CC	CC	CC	CC	CC	CC	CC	CC	CC	CC	CT	CC	CT	CC	CC	CC	CC	CT	CC	CT	CC	CT	CC	CC	CC	CC	CC	CC	CC	CT	CC	CC	CC	CC	CC	CC	CC	CC	CC	CC
816890	C/G	Unknown	66984981	+	CC	CC	CC	CC	CC	CC	CC	CG	CG	CC	CC	CC	CC	CC	CC	CC	CC	CC	CC	CC	CC	CC	CC	CC	CC	CC	CC	CC	CC	CC	CC	CC	CC	CC	CC	CC	CC	CC	CC	CC	CC	CG	CC	CC	CC
817201	A/G	Unknown	67010447	+	AA	AA	AA	AA	AA	AA	AA	AA	AA	AG	AG	AA	AA	AA	AA	AA	AA	AA	AA	AA	AA	AA	AA	AA	AG	AA	AA	AA	AA	AA	AA	AA	AA	AA	AA	AA	AA	AA	AA	AA	AA	AA	AA	AA	AA
817317	G/C	Unknown	67019931	+	GG	GC	GG	GG	GG	GC	GG	GG	GG	GC	GC	GG	GG	GG	GG	GG	GG	GG	GG	GG	GG	GG	GG	GG	GG	GG	GG	GG	GG	GG	GG	GG	GG	GG	GG	GG	GG	GG	GG	GG	GG	GG	GC	GG	GG
817545	C/T	Unknown	67038626	+	CC	CT	CC	CC	CC	CC	CC	CC	CC	CC	CC	CC	CC	CC	CC	CC	CC	CT	CC	CC	CC	CT	CC	CC	CC	CC	CC	CC	CC	CC	CC	CC	CC	CC	CC	CC	CC	CT	CT	CC	CC	CC	CC	CC	CC
817826	G/C	Unknown	67061658	+	GC	GC	GC	GC	GC	GC	GC	GG	GC	GC	GC	GC	GC	GC	GC	GC	GC	GC	GC	GC	GC	GC	GC	GC	GC	GC	GC	GC	GC	GC	GC	GC	GC	GC	GC	GC	GC	GC	GC	GC	GC	GC	GC	GC	GC
817826	C/G	Unknown	67061693	+	CG	CG	CC	CG	CG	CG	CG	CG	CG	CG	CG	CG	CG	CG	CC	CG	CG	CG	CG	CG	CG	CG	CC	CG	CG	CG	CG	CG	CG	CG	CG	CG	CG	CG	CG	CG	CG	CG	CG	CG	CG	CG	CG	CG	CG
817826	C/T	Unknown	67061702	+	CC	CC	CT	CT	CC	CC	CC	CT	CC	CT	CT	CT	CT	CT	CT	CC	CT	CC	CT	CC	CT	CT	CT	CC	CT	CT	CC	CC	CC	CC	CC	CC	CT	CC	CC	CT	CC	CC	CC	CT	CC	CC	CT	CC	CC
818256	A/G	Unknown	67096938	+	AA	AA	AA	AG	AA	AA	AA	AA	AA	AA	AA	AA	AA	AA	AA	AA	AA	AA	AG	AA	AA	AG	AG	AA	AA	AA	AA	AA	AA	AA	AA	AA	AA	AA	AA	AA	AA	AG	AA	AA	AA	AA	AA	AA	AA
818267	G/A	Unknown	67097827	+	GG	GG	GG	GG	GG	GG	GG	GG	GA	GG	GG	GG	GG	GG	GG	GG	GG	GG	GG	GG	GG	GG	GG	GG	GA	GG	GG	GG	GG	GG	GG	GG	GG	GG	GG	GG	GG	GG	GG	GG	GA	GG	GG	GG	GG
818306	C/G	Unknown	67101041	+	CC	CC	CC	CC	CC	CC	CC	CC	CG	CC	CC	CC	CC	CC	CC	CC	CC	CC	CC	CC	CC	CC	CC	CC	CG	CC	CC	CC	CC	CC	CC	CC	CC	CC	CC	CC	CC	CC	CC	CC	CC	CC	CC	CC	CC
818355	C/T	Unknown	67105067	+	CC	CC	CC	CC	CC	CC	CC	CC	CC	CC	CC	CC	CC	CC	CC	CC	CC	CC	CC	CC	CC	CC	CC	CC	CT	CC	CC	CC	CC	CC	CC	CC	CC	CC	CC	CC	CC	CC	CC	CC	CC	CC	CC	CC	CC
818454	G/A	Unknown	67113190	+	GG	GG	GG	GG	GG	GG	GA	GG	GG	GG	GG	GG	GG	GG	GG	GG	GG	GG	GG	GG	GG	GA	GA	GG	GG	GG	GG	GG	GG	GG	GG	GG	GG	GG	GG	GG	GG	GG	GG	GG	GG	GG	GA	GG	GG
818672	C/T	Unknown	67131038	+	CC	CC	CC	CC	CC	CC	CT	CC	CC	CC	CC	CC	CC	CC	CC	CC	CC	CC	CC	CC	CC	CT	CC	CC	CC	CC	CC	CC	CC	CC	CT	CC	CC	CC	CC	CC	CC	CC	CC	CC	CC	CC	CC	CC	CC
819880	C/T	Unknown	67230114	+	CC	CC	CC	CC	CC	CC	CC	CC	CC	CC	CC	CT	CC	CC	CC	CC	CT	CC	CC	CC	CC	CC	CC	CC	CC	CC	CC	CC	CC	CT	CC	CC	CC	CC	CC	CC	CC	CC	CC	CC	CC	CC	CC	CC	CT
820231	A/G	Unknown	67258893	+	AG	AG	AG	AG	AG	AG	AG	AG	AG	AG	AG	AG	AG	AG	AG	AG	AA	AG	AG	AG	AG	AG	AG	AG	AG	AG	AG	AG	AG	AG	AG	AG	AA	AG	AG	AG	AG	AG	AG	AG	AG	AG	AG	AG	AG
820854	G/T	Unknown	67309983	+	GG	GG	GT	GT	GG	GT	GG	GT	GG	GG	GG	GG	GT	GT	GG	GG	GG	GG	GG	GG	GT	GG	GG	GG	GG	GG	GT	GG	GG	GG	GG	GG	GG	GG	GT	GG	GG	GG	GG	GG	GG	GG	GG	GT	GG
820854	A/G	Unknown	67309989	+	AA	AG	AG	AG	AG	AG	AG	AG	AG	AG	AA	AG	AG	AG	AG	AG	AG	AA	AG	AG	AG	GG	AA	AA	AA	AA	AG	AG	AG	AG	AG	AA	AG	AG	AG	AG	AG	AG	AG	AA	AA	AG	AG	AG	AG
820989	G/T	Unknown	67321056	+	GG	GG	GG	GG	GG	GG	GG	GG	GG	GG	GG	GG	GG	GG	GG	GG	GG	GG	GG	GG	GG	GG	GG	GG	GT	GG	GG	GG	GT	GT	GG	GG	GG	GG	GG	GG	GG	GT	GG	GT	GG	GG	GT	GG	GG
821121	T/G	Unknown	67331878	+	TG	TG	TG	TG	TG	TT	TG	TG	TT	TG	TG	TG	TG	TG	TG	TG	TG	TG	TG	TG	TG	TT	TG	TG	TG	TG	TG	TG	TG	TG	TG	TG	TG	TG	TG	TG	TG	TT	TG	TG	TG	TG	TG	TG	TG
821784	G/A	Unknown	67386255	+	GA	GG	GG	GG	GG	GG	GG	GA	GG	GA	GA	GG	GG	GG	GG	GG	GG	GG	GG	GG	GG	GA	GG	GA	GG	GA	GG	GA	GG	GG	GG	GG	GG	GA	GG	GG	GG	GG	GG	GG	GG	GG	GG	GG	GG
822027	G/A	Unknown	67406161	+	GG	GG	GG	GG	GG	GG	GG	GG	GG	GG	GG	GG	GG	GG	GG	GG	GG	GG	GG	GG	GG	GG	GG	GG	GG	GG	GG	GG	GG	GG	GG	GG	GG	GG	GG	GG	GG	GG	GG	GG	GG	GG	GG	GG	GG
822716	C/T	Unknown	67462641	+	CT	CC	CC	CC	CT	CC	CC	CC	CC	CC	CC	CC	CC	CC	CC	CC	CC	CC	CC	CC	CC	CC	CC	CC	CC	CC	CC	CC	CC	CC	CC	CC	CC	CC	CC	CC	CC	CC	CC	CC	CC	CC	CC	CC	CC
822722	C/T	Unknown	67463152	+	CC	CC	CC	CC	CC	CC	CC	CC	CC	CC	CC	CC	CC	CC	CC	CC	CC	CC	CC	CC	CT	CC	CC	CC	CC	CC	CC	CC	CC	CC	CC	CT	CC	CC	CT	CC	CC	CC	CC	CC	CC	CC	CC	CC	CC
824049	T/C	Unknown	67571982	+	TT	TT	TT	TT	TC	TT	TT	TT	TT	TT	TT	TT	TT	TT	TT	TC	TT	TT	TT	TT	TC	TT	TT	TT	TT	TC	TC	TT	TT	TT	TT	TT	TT	TT	TT	TT	TT	TT	TC	TC	TT	TC	TT	TT	TT
824239	G/A	Unknown	67587532	+	GG	GG	GG	GG	GG	GG	GG	GG	GA	GG	GG	GG	GG	GG	GA	GG	GG	GG	GG	GG	GG	GG	GG	GG	GG	GG	GG	GG	GG	GG	GG	GG	GG	GG	GG	GG	GG	GG	GA	GA	GG	GG	GG	GG	GG
824395	C/A	Unknown	67600323	+	CC	CC	CC	CC	CC	CC	CA	CC	CC	CC	CC	CC	CC	CC	CC	CC	CC	CC	CC	CC	CC	CC	CA	CC	CC	CC	CC	CC	CC	CC	CC	CC	CC	CC	CC	CC	CC	CC	CC	CC	CC	CC	CC	CC	CC
824395	A/G	Unknown	67600324	+	AG	AG	AG	AG	AG	AG	AA	AG	AG	AG	AG	AG	AG	AA	AG	AG	AG	AG	AG	AG	AG	AG	AG	AG	AG	AG	GG	AG	AG	AG	AG	AG	AA	AG	AG	AG	AG	AG	AG	AG	AG	AG	AG	AG	AG
824415	C/G	Unknown	67601970	+	CC	CC	CC	CC	CC	CC	CC	CC	CG	CC	CC	CG	CC	CC	CC	CC	CC	CC	CC	CC	CC	CC	CG	CC	CG	CC	CC	CC	CC	CC	CC	CG	CC	CC	CC	CC	CC	CG	CC	CC	CC	CC	CC	CC	CC
824776	T/C	Unknown	67631569	+	TT	TT	TT	TT	TT	TT	TT	TT	TC	TT	TC	TT	TT	TT	TT	TT	TT	TT	TT	TT	TT	TT	TT	TT	TT	TC	TT	TC	TC	TT	TC	TC	TT	TT	TT	TT	TT	TT	TC	TT	TC	TC	TT	TT	TT
824888	G/A	Unknown	67640759	+	GA	GA	GA	GA	GA	GA	GA	GA	GA	GA	GA	GA	GA	GA	GA	GA	GA	GA	GA	GA	GA	GA	GA	GA	GA	GA	GA	GA	GA	GA	GA	GA	GA	GA	GA	GA	GA	GA	GA	GA	GA	GA	GA	GA	GA
825277	G/A	Unknown	67672647	+	GG	GG	GG	GG	GG	GG	GG	GA	GA	GG	GG	GG	GG	GG	GG	GG	GG	GG	GG	GG	GG	GG	GG	GA	GG	GG	GA	GG	GG	GG	GG	GG	GG	GG	GG	GG	GG	GA	GG	GG	GG	GG	GG	GG	GA
825277	G/A	Unknown	67672653	+	GG	GG	GG	GG	GG	GG	GG	GG	GG	GG	GG	GA	GG	GG	GG	GG	GG	GG	GG	GG	GG	GG	GG	GG	GA	GG	GG	GG	GG	GG	GG	GG	GG	GG	GG	GG	GG	GG	GG	GA	GG	GG	GA	GG	GG
825438	G/A	Unknown	67685857	+	GG	GG	GG	GG	GA	GG	GG	GG	GG	GG	GG	GG	GG	GG	GG	GG	GG	GG	GG	GG	GG	GG	GG	GG	GG	GG	GA	GG	GG	GG	GA	GG	GG	GG	GG	GG	GG	GG	GG	GG	GG	GG	GG	GG	GG
825438	A/T	Unknown	67685903	+	AT	AA	AA	AA	AA	AT	AT	AA	AA	AA	AA	AA	AA	AT	AA	AA	AA	AA	AA	AA	AA	AA	AA	AA	AA	AA	AA	AT	AA	AA	AA	AA	AA	AA	AT	AA	AA	AT	AA	AA	AA	AT	AA	AA	AA
827457	C/T	Unknown	67851448	+	CC	CC	CC	CC	CC	CT	CC	CC	CC	CC	CC	CC	CC	CC	CC	CC	CT	CC	CC	CC	CC	CC	CC	CC	CC	CC	CT	CC	CC	CT	CT	CC	CC	CC	CC	CC	CC	CC	CT	CC	CC	CC	CT	CC	CC
827586	T/C	Unknown	67862007	+	TT	TT	TT	TT	TT	TT	TT	TT	TT	TT	TT	TC	TT	TT	TT	TT	TT	TT	TT	TT	TT	TT	TT	TT	TT	TT	TT	TT	TT	TT	TT	TT	TT	TT	TT	TT	TT	TT	TC	TC	TT	TT	TT	TT	TC
827610	G/A	Unknown	67863953	+	GG	GG	GG	GG	GG	GG	GG	GG	GG	GG	GA	GG	GG	GG	GA	GG	GG	GG	GG	GG	GG	GG	GG	GG	GG	GA	GG	GG	GG	GA	GG	GG	GG	GG	GG	GG	GG	GA	GA	GG	GG	GA	GG	GG	GG
827818	G/A	Unknown	67881017	+	GA	GA	GA	GA	GA	GA	GA	GA	GA	GA	GA	GG	GA	GA	GA	GA	GG	GA	GG	GA	GA	GA	GA	GA	GA	GA	GA	GA	GA	GA	GA	GA	GA	GA	GA	GA	GA	GA	GA	GA	GA	GA	GA	GA	GA
828968	C/T	Unknown	67975332	+	CC	CT	CT	CT	CT	CT	CC	CT	CC	CT	CT	CT	CT	CT	CT	CT	CT	CT	CT	CT	CT	CT	CT	CT	CT	CT	CC	CC	CT	CT	CT	CT	CT	CT	CT	CT	CT	CT	CC	CC	CT	CT	CT	CT	TT
829488	C/T	Unknown	68017980	+	CC	CC	CC	CT	CC	CC	CC	CC	CC	CC	CC	CC	CC	CC	CC	CC	CC	CC	CC	CC	CC	CC	CT	CC	CT	CC	CC	CC	CC	CC	CC	CC	CC	CC	CC	CC	CC	CC	CC	CC	CC	CT	CC	CC	CC
830332	C/A	Unknown	68087175	+	CC	CC	CC	CC	CC	CC	CC	CC	CC	CC	CC	CC	CC	CC	CC	CA	CC	CC	CC	CC	CA	CC	CC	CC	CC	CC	CA	CC	CC	CC	CC	CC	CC	CC	CC	CC	CC	CC	CC	CC	CC	CC	CC	CC	CC
830984	A/G	Unknown	68140653	+	AG	AG	AG	AG	AG	AG	AG	AG	AA	AG	AG	AG	AG	AG	AG	AG	AG	AG	AG	AG	AG	AG	AG	AG	AG	AG	AG	AG	AG	AG	AG	AG	AG	AG	AG	AG	AG	AG	AG	AG	AG	AG	AA	AG	AG
831068	C/G	Unknown	68147522	+	CG	CG	CG	CG	CG	CG	CG	CG	CG	CG	CG	CG	CC	CG	CG	CG	CG	CG	CG	CG	CG	CG	CG	CG	CG	CG	CG	CG	CG	CG	CG	CG	CG	CG	CG	CG	CG	CC	CC	CG	CG	CG	CC	CG	CG
831068	C/A	Unknown	68147531	+	CC	CC	CC	CC	CC	CC	CC	CC	CC	CC	CC	CA	CC	CC	CC	CC	CC	CC	CC	CC	CA	CA	CC	CC	CC	CC	CC	CC	CC	CA	CC	CC	CC	CC	CC	CC	CC	CC	CA	CA	CC	CC	CC	CC	CC
831077	A/C	Unknown	68148265	+	AA	AA	AA	AA	AA	AC	AA	AC	AA	AA	AA	AA	AA	AA	AA	AA	AA	AA	AA	AA	AA	AA	AA	AA	AA	AC	AA	AA	AA	AA	AA	AA	AA	AA	AA	AA	AA	AA	AA	AA	AA	AC	AA	AA	AA
831149	G/A	Unknown	68154147	+	GG	GG	GG	GG	GG	GG	GG	GG	GG	GG	GG	GG	GG	GG	GG	GG	GG	GG	GG	GG	GG	GG	GG	GG	GG	GG	GG	GG	GG	GG	GG	GG	GG	GG	GG	GG	GG	GG	GG	GG	GG	GG	GG	GG	GG
831570	C/T	Unknown	68188711	+	CT	CC	CC	CC	CC	CC	CC	CC	CC	CT	CC	CC	CC	CC	CC	CC	CC	CC	CC	CC	CC	CC	CC	CC	CC	CC	CC	CC	CC	CC	CC	CC	CC	CC	CC	CC	CC	CC	CC	CC	CC	CC	CC	CC	CC
832149	G/C	Unknown	68236153	+	GC	GC	GC	GC	GC	GC	GC	GC	GC	GC	GC	GC	GC	GC	GC	GC	GC	GC	GC	GC	GC	GC	GC	GC	GC	GC	GC	GC	GC	GC	GC	GC	GC	GC	GC	GC	GC	GC	GC	GC	GC	GC	GC	GC	GC
832149	C/G	Unknown	68236171	+	CG	CG	CG	CG	CG	CG	CG	CG	CG	CG	CG	CG	CG	CG	CG	CG	CG	CG	CG	CC	CG	CG	CG	CG	CG	CG	CC	CG	CG	CG	CG	CG	CG	CG	CG	CG	CG	CG	CG	CG	CC	CG	CG	CG	CG
832267	G/C	Unknown	68245837	+	GC	GC	GC	GC	GC	GC	GG	GC	GC	GC	GC	GC	GC	GC	GC	GG	GC	GC	GC	GG	GC	GG	GG	GG	GG	GC	GC	GG	GC	GG	GG	GG	GC	GG	GG	GC	GG	GG	GC	GG	GC	GC	GG	GC	GC
832267	C/T	Unknown	68245853	+	CC	CC	CC	CC	CT	CT	CC	CC	CT	CT	CC	CC	CC	CC	CC	CC	CC	CC	CC	CC	CC	CT	CC	CC	CC	CC	CT	CC	CC	CC	CC	CC	CC	CC	CC	CC	CC	CC	CC	CC	CC	CC	CC	CC	CC
832476	G/A	Unknown	68262978	+	GG	GG	GG	GG	GG	GG	GG	GG	GG	GG	GG	GG	GG	GG	GG	GG	GG	GG	GG	GG	GA	GG	GG	GG	GG	GG	GG	GG	GG	GG	GG	GA	GG	GG	GG	GG	GG	GG	GG	GG	GG	GG	GA	GG	GG
833043	C/T	Unknown	68309511	+	CT	CT	CT	CT	CC	CT	CT	CT	CT	CC	CT	CT	CT	CT	CT	CT	CC	CC	CT	CT	CT	CT	CC	CT	CC	CT	CT	CC	CT	CT	CT	CT	CT	CT	CT	CT	CT	CT	CT	CT	CC	CT	CC	CC	CT
833542	C/T	Unknown	68350372	+	CC	CC	CC	CT	CT	CC	CC	CC	CC	CC	CC	CC	CC	CT	CT	CC	CC	CC	CC	CC	CT	CC	CC	CT	CC	CC	CC	CC	CC	CC	CC	CT	CC	CC	CT	CC	CC	CC	CC	CC	CC	CC	CC	CC	CC
833842	G/A	Unknown	68374974	+	GG	GG	GG	GG	GG	GG	GG	GG	GG	GG	GA	GG	GG	GG	GG	GG	GG	GG	GG	GG	GG	GG	GA	GG	GA	GG	GG	GA	GG	GA	GA	GG	GG	GG	GG	GG	GG	GA	GG	GG	GA	GG	GA	GG	GG
834479	T/C	Unknown	68427207	+	TC	TC	TT	TC	TC	TC	TC	TC	TC	TC	TC	TC	TC	TC	TC	TC	TC	TC	TC	TC	TC	TC	TT	TC	TC	TC	TC	TC	TC	TC	TC	TC	TC	TC	TC	TC	TC	TC	TT	TC	TC	TC	TC	TC	TC
834479	G/C	Unknown	68427228	+	GG	GC	GC	GG	GC	GG	GC	GC	GG	GC	GG	GG	GG	GG	GC	GG	GC	GC	GG	GG	GG	GG	GG	GC	GC	GC	GC	GG	GC	GG	GC	GG	GG	GG	GG	GG	GG	GC	GG	GG	GC	GG	GG	GG	GG
835263	G/A	Unknown	68491509	+	GG	GG	GG	GG	GG	GA	GG	GG	GG	GG	GG	GG	GG	GG	GG	GG	GG	GG	GG	GG	GG	GG	GG	GG	GG	GG	GG	GG	GG	GG	GG	GG	GG	GG	GG	GG	GG	GG	GG	GG	GG	GG	GG	GG	GG
836205	C/T	Unknown	68568765	+	CC	CC	CC	CC	CC	CC	CC	CC	CC	CC	CC	CC	CC	CC	CT	CT	CC	CC	CC	CC	CC	CC	CC	CC	CC	CC	CC	CC	CC	CC	CC	CC	CC	CC	CC	CC	CC	CC	CC	CC	CC	CC	CC	CC	CC
836307	G/A	Unknown	68577099	+	GG	GG	GG	GG	GG	GA	GG	GG	GG	GG	GA	GG	GG	GA	GG	GG	GG	GG	GG	GG	GG	GG	GG	GG	GG	GG	GG	GG	GG	GA	GG	GG	GG	GG	GG	GG	GG	GG	GG	GG	GG	GG	GG	GG	GG
836515	C/T	Unknown	68594186	+	CC	CC	CC	CC	CT	CC	CC	CC	CC	CC	CC	CC	CC	CC	CC	CC	CT	CC	CC	CC	CC	CC	CC	CC	CC	CC	CT	CC	CC	CT	CC	CC	CC	CC	CC	CC	CC	CC	CT	CC	CT	CC	CC	CC	CC
836975	G/C	Unknown	68631908	+	GG	GG	GG	GG	GG	GG	GG	GG	GG	GG	GG	GG	GG	GG	GG	GG	GG	GC	GG	GG	GG	GG	GG	GG	GG	GG	GG	GG	GG	GG	GG	GG	GG	GC	GG	GG	GG	GC	GG	GG	GC	GG	GG	GG	GG
837121	C/T	Unknown	68643847	+	CC	CC	CC	CC	CC	CC	CT	CC	CC	CC	CC	CC	CC	CC	CC	CT	CC	CC	CC	CC	CC	CC	CC	CT	CC	CC	CC	CC	CC	CC	CC	CT	CC	CC	CC	CC	CC	CC	CT	CC	CC	CT	CC	CC	CC
837227	G/C	Unknown	68652573	+	GC	GC	GC	GG	GC	GC	GC	GC	GC	GC	GC	GC	GG	GC	GC	GC	GC	GC	GC	GC	GC	GC	GC	GG	GC	GC	GC	GG	GC	GC	GC	GC	GC	GG	GC	GC	GC	GC	GC	GG	GG	GC	GC	GC	GC
837227	G/T	Unknown	68652574	+	GT	GT	GT	GG	GT	GT	GT	GT	GT	GT	GT	GT	GG	GT	GT	GT	GT	GT	GT	GT	GT	GT	GT	GG	GT	GT	GT	GG	GT	GT	GT	GT	GT	GG	GT	GT	GT	GT	GT	GG	GG	GT	GT	GT	GT
837512	G/A	Unknown	68675917	+	GG	GG	GG	GG	GG	GA	GG	GG	GG	GG	GG	GG	GG	GG	GG	GG	GG	GG	GG	GG	GG	GG	GG	GA	GG	GG	GG	GG	GG	GG	GA	GG	GG	GG	GG	GG	GG	GG	GG	GG	GG	GA	GG	GG	GG
838005	G/T	Unknown	68716334	+	GT	GG	GG	GG	GG	GG	GT	GG	GG	GG	GG	GG	GG	GG	GG	GG	GG	GT	GG	GG	GG	GG	GG	GG	GG	GG	GG	GG	GG	GG	GG	GG	GG	GG	GG	GG	GG	GG	GG	GG	GG	GT	GG	GG	GG
838959	G/A	Unknown	68794595	+	GG	GG	GG	GG	GG	GG	GG	GG	GG	GG	GG	GG	GG	GG	GG	GG	GG	GG	GG	GG	GG	GG	GG	GG	GA	GG	GG	GG	GG	GG	GG	GG	GG	GG	GG	GG	GG	GG	GG	GG	GG	GG	GG	GG	GG
839002	G/A	Unknown	68798109	+	GG	GA	GG	GA	GG	GG	GG	GG	GG	GG	GG	GG	GG	GG	GG	GG	GA	GG	GG	GA	GG	GG	GG	GG	GG	GG	GG	GA	GG	GA	GG	GG	GG	GG	GG	GG	GA	GG	GA	GG	GG	GG	GG	GG	GG
839016	G/C	Unknown	68799273	+	GG	GC	GG	GG	GG	GG	GG	GG	GG	GG	GC	GG	GG	GG	GG	GG	GC	GG	GG	GG	GG	GG	GG	GG	GG	GG	GG	GC	GG	GC	GG	GG	GG	GG	GG	GG	GG	GG	GG	GG	GG	GG	GC	GG	GC
839066	C/T	Unknown	68803340	+	CC	CC	CC	CC	CC	CT	CC	CC	CC	CC	CC	CC	CT	CC	CC	CC	CC	CT	CC	CT	CT	CC	CC	CC	CC	CC	CC	CC	CC	CC	CT	CT	CC	CC	CC	CC	CC	CC	CC	CC	CT	CC	CC	CC	CC
839537	C/T	Unknown	68841988	+	CC	CC	CC	CC	CC	CC	CC	CC	CC	CC	CC	CC	CC	CC	CC	CC	CT	CC	CC	CC	CC	CT	CC	CC	CC	CC	CC	CT	CC	CC	CC	CC	CC	CC	CC	CC	CC	CC	CC	CC	CC	CC	CC	CC	CC
839550	G/C	Unknown	68843043	+	GG	GG	GG	GG	GC	GG	GG	GC	GG	GG	GG	GG	GG	GG	GG	GG	GG	GG	GG	GG	GG	GG	GG	GG	GC	GG	GG	GG	GG	GG	GG	GG	GG	GG	GG	GG	GG	GG	GG	GG	GG	GG	GG	GG	GG
841375	T/C	Unknown	68992703	+	TC	TC	TC	TC	TC	TT	TC	TC	TC	TC	TC	TC	TC	TT	TC	TC	TC	TC	TC	TC	TC	TC	TC	TC	TC	TC	TC	TC	TC	TC	TT	TC	TC	TT	TC	TC	TC	TC	TC	TC	TC	TC	TC	TC	TC
841420	G/A	Unknown	68996375	+	GG	GG	GG	GG	GG	GG	GG	GG	GG	GG	GG	GG	GG	GG	GG	GG	GG	GG	GG	GG	GG	GG	GA	GG	GG	GG	GG	GG	GA	GG	GG	GG	GG	GG	GG	GG	GG	GG	GG	GG	GG	GG	GG	GG	GG
841486	C/T	Unknown	69001810	+	CC	CC	CC	CC	CC	CC	CC	CC	CC	CC	CC	CC	CC	CC	CC	CC	CC	CC	CC	CC	CC	CC	CC	CC	CC	CC	CC	CC	CC	CC	CC	CT	CC	CC	CC	CC	CC	CC	CC	CC	CC	CT	CC	CC	CC
841617	A/G	Unknown	69012530	+	AG	AG	AG	AG	AG	AG	AG	AG	AG	AG	AG	AG	AG	AG	AG	AG	AG	AG	AG	AA	AG	AG	AG	AG	AG	AG	AG	AG	AG	AG	AG	AG	AG	AG	AG	AG	AG	AG	AG	AG	AG	AG	AG	AG	AG
841729	C/G	Unknown	69021714	+	CC	CG	CC	CC	CG	CG	CC	CC	CC	CC	CC	CC	CC	CC	CC	CC	CG	CC	CC	CC	CG	CC	CC	CG	CC	CC	CC	CC	CC	CC	CG	CC	CC	CC	CC	CC	CC	CC	CC	CC	CC	CC	CC	CC	CC
841836	A/G	Unknown	69030492	+	AG	AG	AG	AG	AG	AG	AG	AG	AG	AG	AG	AG	AG	GG	AG	AG	AG	AG	AG	AG	AG	AG	GG	AG	AG	AG	AG	AG	AG	AG	AG	AG	AG	AG	AG	AG	AG	AA	AA	AG	AG	AG	AG	AG	AG
842320	C/T	Unknown	69070190	+	CC	CC	CC	CC	CC	CC	CC	CC	CC	CC	CC	CC	CC	CC	CC	CC	CC	CC	CC	CC	CC	CC	CC	CC	CC	CC	CC	CC	CT	CC	CC	CC	CC	CC	CC	CC	CC	CC	CC	CC	CC	CC	CC	CC	CC
842392	G/A	Unknown	69076069	+	GG	GG	GG	GG	GG	GG	GG	GG	GG	GG	GG	GG	GG	GG	GG	GG	GG	GG	GG	GG	GG	GG	GG	GA	GG	GG	GG	GG	GG	GG	GG	GG	GG	GG	GG	GG	GG	GG	GG	GG	GG	GG	GG	GG	GG
842791	G/C	Unknown	69108786	+	GG	GG	GG	GG	GG	GC	GG	GG	GG	GG	GG	GG	GG	GG	GG	GG	GC	GG	GG	GG	GG	GG	GG	GC	GG	GG	GG	GG	GG	GC	GG	GG	GG	GG	GG	GG	GG	GC	GG	GG	GG	GG	GG	GG	GG
842831	G/A	Unknown	69112088	+	GA	GA	GA	GA	GA	GA	GA	GA	GA	GA	GA	GA	GA	GA	GA	GA	GA	GA	GA	GA	GA	GA	GA	GA	GA	GA	GA	GA	GA	GA	GA	GA	GA	GA	GA	GA	GA	GA	GA	GA	GA	GA	GA	GA	GA
842887	C/G	Unknown	69116692	+	CC	CC	CC	CG	CC	CC	CG	CC	CC	CC	CC	CC	CC	CC	CC	CC	CG	CC	CC	CC	CC	CC	CG	CC	CC	CC	CC	CC	CC	CC	CC	CC	CC	CG	CC	CC	CC	CC	CC	CG	CC	CC	CC	CC	CC
842893	C/T	Unknown	69117167	+	CT	CC	CC	CC	CC	CC	CC	CC	CC	CC	CC	CC	CT	CC	CC	CC	CC	CC	CC	CC	CC	CC	CT	CC	CC	CC	CC	CC	CC	CC	CC	CC	CC	CT	CC	CC	CC	CT	CC	CC	CC	CT	CC	CC	CC
843354	C/T	Unknown	69154983	+	CC	CC	CC	CC	CC	CC	CT	CC	CT	CC	CC	CC	CC	CC	CC	CC	CC	CC	CC	CC	CC	CC	CC	CC	CT	CC	CC	CC	CC	CC	CC	CC	CC	CC	CC	CC	CC	CC	CC	CC	CT	CC	CC	CC	CC
843354	C/G	Unknown	69154986	+	CC	CC	CC	CC	CC	CC	CC	CC	CC	CC	CG	CC	CC	CC	CC	CG	CC	CC	CC	CG	CC	CC	CG	CC	CC	CC	CC	CC	CC	CC	CC	CC	CC	CC	CC	CC	CC	CC	CC	CC	CG	CC	CC	CC	CC
843510	A/C	Unknown	69167761	+	AC	AA	AA	AC	AA	AA	AA	AA	AA	AA	AA	AC	AA	AA	AA	AA	AC	AA	AA	AA	AA	AC	AA	AA	AA	AA	AA	AC	AA	AA	AA	AC	AA	AA	AA	AA	AA	AA	AA	AA	AA	AA	AA	AA	AA
843510	C/A	Unknown	69167803	+	CA	CC	CC	CA	CC	CC	CC	CC	CC	CC	CC	CA	CC	CC	CC	CC	CA	CC	CC	CC	CC	CA	CC	CC	CC	CC	CC	CA	CC	CC	CC	CA	CC	CC	CC	CC	CC	CC	CC	CC	CC	CC	CC	CC	CC
843558	G/A	Unknown	69171699	+	GG	GG	GG	GG	GG	GG	GG	GG	GG	GG	GG	GA	GG	GG	GG	GG	GG	GG	GG	GG	GG	GG	GG	GG	GG	GG	GG	GG	GG	GG	GG	GG	GG	GA	GG	GG	GG	GG	GG	GG	GG	GG	GG	GG	GG
843844	G/C	Unknown	69195143	+	GG	GG	GG	GG	GG	GG	GG	GG	GG	GG	GG	GG	GG	GG	GG	GG	GG	GG	GG	GG	GG	GG	GG	GG	GG	GG	GG	GG	GG	GG	GG	GG	GG	GG	GG	GG	GG	GG	GG	GG	GG	GC	GG	GG	GG
843910	T/A	Unknown	69200577	+	TT	TT	TT	TA	TT	TT	TA	TT	TA	TT	TA	TT	TT	TT	TT	TT	TT	TT	TT	TT	TT	TT	TT	TT	TA	TT	TT	TT	TA	TT	TT	TT	TT	TT	TT	TT	TT	TT	TT	TA	TT	TT	TT	TT	TT
844519	C/T	Unknown	69250524	+	CC	CC	CC	CC	CC	CC	CC	CC	CC	CC	CC	CC	CC	CC	CT	CC	CC	CC	CC	CC	CC	CC	CC	CC	CC	CC	CC	CC	CC	CC	CC	CC	CC	CC	CC	CC	CC	CC	CC	CT	CC	CC	CC	CC	CC
845185	G/A	Unknown	69305137	+	GG	GA	GG	GG	GG	GA	GG	GG	GG	GG	GG	GG	GG	GG	GG	GG	GG	GG	GG	GG	GG	GG	GA	GG	GG	GG	GA	GA	GG	GG	GG	GG	GG	GG	GG	GG	GG	GA	GG	GA	GG	GG	GA	GG	GA
845315	G/A	Unknown	69315763	+	GG	GG	GG	GG	GG	GG	GG	GG	GG	GG	GG	GG	GG	GG	GA	GG	GG	GG	GG	GG	GG	GG	GG	GG	GG	GG	GG	GG	GG	GG	GG	GG	GG	GG	GG	GG	GA	GG	GG	GG	GG	GG	GG	GG	GG
845355	G/A	Unknown	69319084	+	GG	GG	GG	GG	GG	GG	GG	GG	GG	GG	GG	GG	GG	GG	GG	GG	GG	GG	GG	GG	GG	GG	GG	GG	GA	GG	GG	GG	GG	GG	GG	GG	GG	GG	GG	GG	GG	GG	GG	GG	GG	GG	GG	GG	GG
845814	C/G	Unknown	69356696	+	CG	CC	CC	CC	CC	CC	CC	CC	CC	CC	CC	CC	CG	CC	CC	CC	CC	CC	CC	CC	CC	CC	CC	CC	CC	CC	CC	CC	CC	CG	CG	CG	CC	CG	CC	CC	CC	CG	CC	CC	CC	CC	CC	CC	CC
846711	G/C	Unknown	69430227	+	GG	GG	GG	GG	GC	GC	GC	GG	GG	GG	GG	GG	GG	GG	GG	GG	GC	GG	GG	GG	GG	GG	GG	GC	GG	GG	GG	GG	GG	GC	GG	GG	GG	GG	GG	GG	GG	GC	GG	GG	GG	GG	GG	GG	GG
846803	G/T	Unknown	69437822	+	GG	GG	GG	GG	GG	GG	GG	GT	GG	GG	GG	GG	GG	GG	GG	GG	GG	GG	GG	GG	GG	GG	GG	GG	GG	GG	GG	GG	GG	GG	GG	GG	GG	GG	GG	GG	GG	GG	GT	GG	GG	GG	GG	GG	GG
848341	C/T	Unknown	69563918	+	CT	CC	CC	CC	CC	CC	CC	CC	CC	CC	CC	CC	CC	CC	CC	CC	CC	CC	CC	CC	CC	CC	CC	CC	CC	CC	CC	CC	CC	CC	CC	CC	CC	CC	CT	CC	CC	CC	CT	CC	CC	CC	CC	CC	CC
848617	G/A	Unknown	69586566	+	GA	GG	GG	GG	GG	GG	GA	GA	GG	GG	GG	GG	GG	GG	GG	GG	GG	GG	GG	GG	GG	GG	GG	GG	GG	GG	GA	GG	GG	GA	GA	GA	GG	GG	GG	GG	GG	GG	GG	GA	GG	GG	GG	GG	GG
848851	G/A	Unknown	69605735	+	GA	GG	GA	GG	GA	GG	GA	GA	GG	GA	GA	GG	GA	GA	GA	GA	GA	GA	GA	GA	GA	GG	GG	GA	GA	GA	GG	GA	GA	GA	GA	GA	GA	GA	GG	GA	GA	GA	GA	GA	GA	GG	GA	GA	GA
849066	C/T	Unknown	69623352	+	CT	CT	CT	CT	CT	CT	CT	CT	CT	CT	CT	CT	CT	CT	CT	CT	CT	CT	CT	CT	CT	CT	CT	CT	CT	CT	CT	CC	CC	CT	CT	CT	CT	CT	CT	CT	CC	CC	CT	CT	CT	CT	CT	CT	CT
849144	C/T	Unknown	69629737	+	CT	CT	CT	CT	CT	CC	CT	CT	CC	CT	CT	CT	CT	CT	CT	CC	CT	CT	CT	CC	CT	CT	CT	CT	CT	CT	CT	CT	CT	CT	CT	CC	CT	CT	CT	CT	CT	CC	CT	CT	CT	CT	CC	CT	CT
849624	C/G	Unknown	69669107	+	CC	CC	CC	CC	CC	CC	CG	CC	CC	CC	CC	CC	CC	CC	CC	CC	CC	CC	CC	CC	CC	CC	CC	CC	CC	CC	CC	CC	CG	CG	CC	CC	CC	CC	CC	CC	CC	CC	CC	CC	CC	CG	CC	CC	CG
849671	A/T	Unknown	69672943	+	AA	AA	AA	AT	AA	AT	AA	AA	AA	AA	AT	AT	AA	AA	AT	AA	AA	AA	AA	AA	AA	AT	AA	AA	AA	AT	AT	AA	AA	AA	AA	AA	AA	AA	AA	AT	AA	AA	AT	AA	AT	AA	AT	AA	AT
850053	C/T	Unknown	69704304	+	CC	CC	CC	CC	CC	CT	CC	CC	CC	CC	CC	CC	CC	CC	CT	CT	CC	CC	CC	CC	CC	CC	CC	CC	CC	CC	CC	CC	CT	CC	CC	CC	CC	CC	CC	CC	CC	CC	CC	CC	CC	CC	CC	CC	CC
850053	C/T	Unknown	69704311	+	CC	CC	CC	CC	CC	CC	CC	CC	CC	CC	CC	CC	CC	CC	CC	CC	CC	CC	CC	CC	CC	CC	CC	CC	CT	CT	CC	CC	CC	CC	CC	CT	CC	CT	CC	CC	CC	CC	CC	CC	CC	CC	CT	CC	CC
850218	G/A	Unknown	69717839	+	GA	GG	GA	GA	GG	GA	GA	GA	GG	GA	GA	GG	GA	GA	GA	GA	GA	GA	GA	GA	GA	GA	GA	GA	GA	GA	GA	GA	GA	GA	GA	GA	GA	GA	GA	GA	GA	GA	GA	GA	GA	GA	GG	GA	GA
850256	C/G	Unknown	69720927	+	CG	CG	CG	CG	CG	CG	CG	CG	CG	CG	CG	CG	CG	CG	CG	CG	CG	CG	CG	CG	CG	CG	CG	CG	CG	CG	CG	CG	CG	CG	CG	CG	CG	CG	CG	CG	CG	CG	CG	CG	CG	CG	CG	CG	CG
850489	C/T	Unknown	69740035	+	CC	CC	CC	CC	CC	CC	CC	CC	CC	CC	CC	CC	CC	CC	CC	CC	CC	CC	CC	CC	CC	CT	CC	CC	CC	CC	CC	CC	CC	CC	CC	CC	CC	CC	CC	CC	CC	CC	CT	CC	CC	CC	CC	CC	CC
850617	C/T	Unknown	69750534	+	CC	CT	CC	CC	CC	CC	CC	CC	CC	CC	CC	CC	CC	CC	CC	CC	CC	CC	CC	CC	CC	CC	CC	CC	CC	CC	CC	CC	CC	CC	CC	CC	CC	CC	CC	CC	CC	CC	CT	CC	CC	CC	CT	CC	CC
850617	C/A	Unknown	69750554	+	CC	CC	CC	CC	CC	CC	CC	CC	CC	CC	CC	CC	CC	CC	CC	CC	CC	CC	CC	CC	CC	CC	CC	CC	CC	CC	CC	CC	CC	CA	CC	CC	CC	CC	CC	CC	CC	CC	CC	CC	CC	CC	CC	CC	CC
850781	G/A	Unknown	69763988	+	GG	GA	GA	GG	GG	GG	GG	GA	GG	GG	GG	GA	GA	GA	GG	GA	GG	GG	GA	GG	GA	GG	GG	GG	GG	GG	GG	GA	GG	GG	GA	GG	GG	GG	GG	GA	GG	GG	GG	GG	GA	GG	GG	GA	GA
850851	G/A	Unknown	69769709	+	GG	GG	GG	GG	GG	GG	GG	GG	GG	GA	GG	GG	GG	GG	GG	GG	GG	GG	GG	GG	GG	GG	GG	GG	GG	GG	GG	GG	GG	GG	GG	GG	GG	GG	GG	GG	GG	GG	GG	GG	GG	GG	GG	GG	GG
851351	A/T	Unknown	69810725	+	AT	AT	AT	AT	AT	AT	AT	AT	AT	AT	AT	AT	AT	AT	AT	AT	AT	AT	AT	AT	AT	AT	AT	AT	AT	AT	AT	AT	AT	AT	AT	AT	AA	AT	AT	AT	AT	AA	AT	AT	AT	AT	AT	AT	AT
851503	G/A	Unknown	69823198	+	GA	GA	GA	GA	GA	GA	GA	GA	GA	GA	GG	GA	GA	GA	GA	GG	GA	GA	GA	GA	GA	GA	GA	GA	GA	GA	GA	GA	GA	GA	GA	GA	GA	GA	GA	GA	GA	GA	GA	GA	GA	GA	GA	GA	GA
852235	T/C	Unknown	69883199	+	TC	TC	TC	TC	TC	TC	TC	TC	TC	TC	TC	TC	TC	TC	TC	TC	TC	TC	TC	TC	TC	TC	TC	TC	TC	TC	TT	TT	TC	TC	TC	TC	TC	TC	TC	TC	TC	TC	TC	TC	TC	TC	TC	TC	TC
852235	T/C	Unknown	69883201	+	TT	TC	TT	TT	TC	TC	TT	TT	TT	TT	TC	TT	TT	TT	TT	TC	TT	TT	TT	TT	TT	TT	TT	TT	TT	TT	TC	TT	TT	TT	TT	TT	TT	TT	TT	TT	TT	TT	TT	TT	TT	TT	TT	TT	TT
852356	G/T	Unknown	69893151	+	GG	GG	GG	GG	GG	GT	GG	GG	GG	GG	GG	GG	GG	GG	GG	GT	GG	GG	GG	GG	GG	GG	GG	GG	GG	GG	GG	GG	GG	GG	GG	GG	GG	GG	GG	GG	GG	GG	GG	GG	GG	GG	GG	GG	GG
852399	G/C	Unknown	69896648	+	GG	GG	GG	GG	GC	GG	GC	GC	GC	GG	GG	GG	GG	GG	GG	GG	GG	GG	GG	GG	GG	GG	GG	GG	GG	GG	GG	GC	GG	GG	GC	GC	GG	GC	GG	GG	GG	GC	GC	GG	GC	GG	GG	GG	GG
852817	T/C	Unknown	69930971	+	TT	TC	TT	TT	TT	TC	TT	TT	TT	TT	TT	TT	TT	TT	TT	TT	TC	TT	TT	TT	TT	TC	TT	TT	TT	TT	TT	TT	TC	TT	TT	TT	TT	TT	TT	TT	TT	TC	TT	TT	TT	TC	TC	TT	TT
853028	G/T	Unknown	69948263	+	GG	GG	GG	GG	GG	GG	GG	GG	GG	GG	GG	GG	GG	GG	GG	GG	GG	GG	GG	GG	GG	GG	GG	GG	GT	GG	GT	GG	GG	GG	GG	GG	GG	GG	GG	GG	GG	GT	GG	GG	GG	GG	GG	GG	GG
853511	C/T	Unknown	69987834	+	CC	CC	CC	CC	CC	CC	CC	CC	CC	CC	CC	CT	CC	CC	CC	CC	CC	CC	CC	CC	CC	CC	CC	CC	CC	CC	CC	CT	CC	CC	CC	CT	CC	CC	CC	CC	CC	CC	CT	CT	CC	CC	CC	CC	CC
853799	C/G	Unknown	70011519	+	CC	CC	CC	CC	CC	CC	CC	CG	CG	CC	CC	CC	CC	CC	CC	CC	CC	CC	CC	CC	CC	CC	CC	CC	CC	CC	CC	CC	CC	CC	CC	CC	CC	CC	CC	CC	CC	CC	CC	CC	CC	CC	CC	CC	CC
853990	G/A	Unknown	70027138	+	GG	GG	GG	GG	GA	GG	GG	GG	GG	GG	GG	GG	GG	GG	GG	GG	GG	GG	GG	GG	GG	GG	GG	GG	GA	GG	GG	GG	GG	GG	GG	GA	GG	GG	GG	GG	GG	GG	GG	GG	GG	GG	GG	GG	GG
854069	C/A	Unknown	70033597	+	CC	CC	CC	CC	CC	CC	CC	CC	CC	CC	CC	CC	CC	CC	CC	CC	CC	CC	CC	CC	CC	CC	CC	CC	CC	CC	CC	CC	CC	CC	CC	CC	CC	CC	CC	CC	CC	CC	CC	CC	CC	CC	CC	CC	CC
854411	G/T	Unknown	70061634	+	GT	GG	GG	GG	GG	GG	GG	GG	GG	GT	GG	GG	GG	GG	GG	GG	GG	GG	GG	GG	GG	GG	GG	GG	GG	GG	GG	GG	GG	GG	GT	GG	GG	GG	GG	GG	GG	GG	GG	GG	GG	GG	GG	GG	GG
854522	C/T	Unknown	70070745	+	CC	CC	CC	CC	CC	CC	CT	CC	CC	CC	CC	CC	CC	CC	CC	CC	CT	CC	CC	CT	CC	CC	CC	CC	CC	CC	CC	CC	CC	CC	CC	CC	CC	CC	CC	CC	CC	CC	CC	CT	CT	CC	CC	CC	CC
854522	C/T	Unknown	70070763	+	CT	CT	CC	CC	CC	CC	CC	CC	CC	CC	CC	CC	CC	CC	CC	CC	CC	CC	CC	CC	CC	CC	CT	CC	CC	CC	CC	CC	CT	CC	CT	CC	CC	CC	CC	CC	CC	CT	CC	CC	CC	CC	CC	CC	CC
855404	T/G	Unknown	70143082	+	TT	TT	TT	TG	TT	TT	TT	TT	TT	TT	TT	TT	TT	TT	TT	TT	TT	TT	TT	TT	TT	TT	TT	TT	TG	TT	TT	TT	TT	TT	TT	TT	TT	TT	TT	TT	TT	TT	TT	TT	TG	TT	TT	TT	TT
856009	A/G	Unknown	70192673	+	GA	GA	GA	GA	GA	GA	GA	GA	GA	GA	GA	GA	GA	GA	GA	GA	GA	GA	GA	GA	GA	GA	GA	GA	GA	GA	GA	GA	GA	GA	GA	GG	GA	GA	GA	GA	GA	GA	GA	GA	GA	GA	GA	GA	GA
856504	T/A	Unknown	70233328	+	TT	TT	TT	TT	TT	TA	TT	TT	TT	TT	TT	TT	TT	TT	TT	TT	TT	TT	TT	TT	TT	TT	TT	TT	TT	TT	TT	TT	TT	TT	TT	TT	TT	TT	TT	TT	TT	TA	AA	TT	TT	TA	TT	TT	TT
856923	G/A	Unknown	70267619	+	GG	GA	GA	GA	GA	GG	GG	GG	GA	GG	GG	GG	GG	GA	GG	GG	GG	GG	GG	GG	GG	GG	GG	GG	GA	GG	GA	GA	GG	GG	GG	GG	GG	GG	GA	GG	GG	GG	GG	GG	GG	GG	GG	GG	GA
856944	C/T	Unknown	70269384	+	CC	CT	CC	CC	CC	CC	CC	CC	CC	CC	CC	CC	CC	CC	CC	CC	CC	CC	CC	CC	CC	CC	CC	CC	CC	CT	CT	CC	CC	CC	CC	CC	CC	CC	CC	CC	CC	CC	CC	CC	CC	CC	CC	CC	CC
857487	A/G	Unknown	70313892	+	AA	AA	AA	AA	AA	AA	AA	AA	AA	AA	AA	AA	AA	AA	AA	AA	AA	AA	AA	AA	AA	AA	AA	AA	AA	AA	AA	AA	AA	AA	AA	AA	AA	AA	AA	AA	AA	AA	AA	AA	AA	AA	AA	AA	AA
857578	G/A	Unknown	70321361	+	GG	GA	GG	GG	GG	GG	GA	GG	GA	GG	GG	GG	GG	GG	GG	GG	GG	GG	GG	GG	GA	GG	GG	GG	GG	GG	GG	GG	GG	GG	GG	GG	GG	GG	GG	GG	GG	GG	GG	GG	GG	GG	GG	GG	GG
857743	A/T	Unknown	70334888	+	AT	AA	AA	AA	AA	AT	AA	AA	AT	AT	AT	AT	AA	AT	AA	AT	AT	AT	AA	AA	AA	AT	AT	AA	AT	AT	AT	AT	AT	AT	AT	AA	AA	AA	AA	AT	AA	AA	AT	AA	AT	AT	AT	AA	AA
857804	G/T	Unknown	70339860	+	GG	GG	GG	GG	GG	GG	GG	GG	GG	GG	GG	GG	GG	GG	GG	GG	GG	GG	GG	GG	GG	GG	GG	GT	GG	GG	GG	GG	GG	GG	GG	GG	GG	GT	GG	GG	GG	GG	GG	GG	GG	GG	GG	GG	GG
857999	C/T	Unknown	70355906	+	CC	CC	CC	CC	CC	CC	CC	CC	CT	CC	CC	CC	CC	CC	CC	CC	CC	CC	CC	CT	CC	CC	CC	CC	CC	CC	CC	CC	CC	CC	CC	CC	CC	CC	CC	CC	CC	CC	CC	CC	CC	CC	CC	CC	CC
858815	C/A	Unknown	70422799	+	CC	CA	CC	CC	CC	CA	CC	CC	CC	CC	CC	CC	CC	CA	CA	CC	CC	CC	CC	CC	CC	CC	CC	CC	CC	CA	CA	CC	CC	CC	CC	CC	CC	CC	CC	CC	CC	CA	CA	CC	CA	CA	CC	CC	CC
858902	G/A	Unknown	70429889	+	GA	GA	GA	GA	GA	GA	GA	GA	GA	GA	GA	GA	GA	GA	GA	GA	GA	GA	GA	GA	GA	GA	GA	GA	GA	GA	GA	GA	GA	GA	GA	GA	GA	GA	GA	GA	GA	GA	GA	GG	GA	GA	GA	GA	GA
859016	G/A	Unknown	70439247	+	GA	GA	GG	GG	GG	GG	GA	GG	GA	GG	GG	GG	GG	GG	GA	GG	GG	GG	GG	GG	GG	GG	GG	GA	GG	GG	GG	GG	GG	GG	GG	GG	GA	GG	GG	GG	GG	GG	GG	GG	GG	GG	GG	GG	GG
859054	A/G	Unknown	70442355	+	AA	AG	AG	AG	AG	AG	AG	AG	AG	AG	AG	AG	AG	AG	AG	AG	AG	AG	AG	AG	AG	AG	AG	AG	AG	AG	AG	AG	AG	AG	AG	AA	AG	AG	AG	AG	AG	AG	AG	AG	AG	AG	AG	AG	AG
859143	C/T	Unknown	70449691	+	CC	CC	CC	CC	CC	CC	CC	CC	CC	CC	CT	CC	CC	CC	CC	CC	CC	CC	CC	CC	CC	CC	CC	CT	CC	CC	CC	CC	CC	CC	CC	CC	CC	CC	CC	CC	CC	CC	CC	CC	CC	CC	CC	CC	CC
859336	G/C	Unknown	70465504	+	GG	GG	GG	GG	GG	GG	GG	GG	GG	GG	GG	GG	GG	GG	GG	GG	GG	GG	GG	GG	GG	GG	GG	GG	GG	GG	GC	GG	GG	GG	GG	GG	GG	GG	GG	GG	GG	GG	GG	GC	GG	GG	GG	GG	GG
859482	C/A	Unknown	70477505	+	CC	CC	CC	CA	CC	CA	CC	CC	CC	CC	CA	CC	CC	CC	CC	CC	CC	CC	CC	CC	CC	CC	CC	CA	CC	CA	CC	CC	CC	CC	CC	CC	CC	CC	CC	CC	CC	CC	CA	CC	CC	CC	CC	CC	CC
860239	C/T	Unknown	70539531	+	CC	CC	CC	CC	CC	CC	CC	CC	CC	CC	CC	CC	CC	CC	CC	CC	CC	CC	CC	CC	CC	CC	CC	CC	CC	CC	CC	CC	CC	CC	CC	CC	CC	CC	CC	CC	CC	CC	CT	CT	CC	CC	CC	CC	CC
860580	C/A	Unknown	70567487	+	CC	CC	CC	CC	CA	CC	CC	CC	CA	CC	CC	CC	CC	CC	CC	CC	CC	CC	CC	CC	CC	CC	CC	CC	CC	CC	CA	CC	CC	CC	CC	CC	CC	CC	CA	CC	CC	CC	CA	CC	CC	CC	CC	CC	CC
860595	C/G	Unknown	70568736	+	CC	CC	CC	CC	CC	CC	CC	CC	CC	CC	CC	CC	CC	CC	CC	CC	CC	CC	CC	CC	CC	CC	CC	CC	CC	CC	CC	CG	CC	CC	CG	CC	CC	CG	CC	CC	CC	CC	CC	CG	CC	CC	CC	CC	CC
860938	T/G	Unknown	70596848	+	TG	TG	TG	TG	TG	TG	TG	TG	TG	TG	TG	TG	TG	TG	TG	TG	TG	TG	TG	TG	TG	TG	TG	TG	TG	TG	TG	TG	TG	TG	TG	TG	TG	TG	TG	TG	TG	TG	TG	TG	TG	TG	TG	TG	TG
861784	C/T	Unknown	70666248	+	CC	CC	CC	CC	CC	CC	CT	CC	CT	CC	CT	CT	CC	CC	CC	CC	CC	CC	CC	CC	CC	CC	CT	CC	CC	CC	CC	CC	CC	CC	CT	CC	CC	CC	CC	CC	CC	CC	CC	CT	CC	CC	CT	CC	CC
862112	G/C	Unknown	70693133	+	GG	GG	GG	GG	GG	GG	GG	GG	GC	GG	GG	GG	GG	GG	GG	GG	GG	GG	GG	GG	GG	GG	GC	GG	GG	GG	GG	GG	GC	GG	GG	GC	GG	GG	GG	GG	GG	GC	GC	GG	GG	GG	GG	GG	GG
862127	C/A	Unknown	70694366	+	CC	CC	CC	CC	CC	CC	CC	CC	CC	CC	CC	CC	CC	CC	CC	CC	CC	CC	CC	CC	CC	CC	CA	CC	CC	CC	CC	CC	CC	CC	CC	CC	CC	CC	CC	CC	CC	CC	CC	CC	CC	CC	CC	CC	CC
862144	C/G	Unknown	70695753	+	CC	CC	CC	CC	CG	CC	CC	CC	CG	CC	CG	CC	CC	CC	CC	CC	CC	CC	CC	CC	CC	CC	CG	CC	CC	CC	CC	CC	CC	CC	CG	CC	CC	CC	CC	CC	CC	CC	CG	CC	CC	CC	CC	CC	CC
862672	T/C	Unknown	70739034	+	TT	TT	TT	TT	TT	TT	TT	TT	TC	TT	TT	TT	TT	TT	TT	TT	TT	TT	TT	TT	TT	TC	TT	TT	TT	TT	TT	TT	TT	TT	TT	TT	TT	TT	TC	TT	TT	TC	TT	TT	TT	TT	TT	TT	TT
862902	C/G	Unknown	70757941	+	CG	CC	CC	CC	CG	CG	CC	CG	CG	CC	CG	CG	CG	CC	CG	CG	CG	CC	CC	CG	CG	CC	CC	CC	CG	CC	CC	CG	CC	CG	CG	CG	CG	CG	CG	CG	CC	CG	CG	CG	CG	CG	CG	CG	CC
863174	C/T	Unknown	70780198	+	CC	CC	CC	CC	CC	CC	CC	CC	CC	CC	CT	CC	CC	CC	CT	CC	CC	CC	CC	CC	CC	CC	CC	CC	CC	CC	CC	CC	CC	CC	CC	CC	CC	CC	CT	CC	CC	CC	CC	CC	CC	CC	CT	CC	CC
863208	C/A	Unknown	70782984	+	CA	CC	CC	CA	CC	CC	CC	CC	CC	CC	CC	CA	CC	CC	CC	CC	CC	CA	CC	CC	CC	CC	CA	CC	CC	CC	CC	CC	CC	CC	CC	CC	CC	CC	CC	CC	CC	CC	CC	CC	CC	CC	CC	CC	CA
863215	C/T	Unknown	70783557	+	CC	CC	CC	CC	CC	CC	CC	CC	CC	CC	CC	CC	CC	CC	CC	CC	CC	CC	CC	CC	CC	CC	CC	CC	CT	CC	CC	CC	CC	CC	CC	CC	CC	CC	CC	CC	CC	CC	CC	CC	CC	CC	CC	CC	CC
863424	C/A	Unknown	70800732	+	CC	CC	CC	CC	CC	CC	CC	CA	CC	CC	CC	CC	CC	CC	CC	CC	CC	CC	CC	CC	CC	CC	CA	CA	CC	CC	CC	CC	CC	CC	CC	CA	CC	CC	CC	CC	CC	CC	CA	CC	CC	CC	CC	CC	CC
864180	G/A	Unknown	70862699	+	GG	GG	GG	GG	GG	GG	GG	GG	GA	GG	GG	GG	GG	GG	GA	GG	GG	GG	GG	GG	GG	GG	GA	GG	GG	GG	GG	GG	GG	GG	GA	GG	GG	GA	GG	GG	GG	GG	GG	GG	GG	GG	GG	GG	GG
864818	G/T	Unknown	70915007	+	GT	GG	GG	GG	GG	GG	GG	GG	GG	GG	GG	GG	GG	GG	GG	GG	GG	GG	GG	GG	GG	GT	GT	GG	GG	GT	GG	GG	GG	GG	GG	GG	GG	GG	GG	GG	GT	GG	GG	GG	GG	GG	GG	GG	GG
864818	T/G	Unknown	70915008	+	TG	TT	TT	TT	TT	TT	TT	TT	TT	TT	TT	TT	TT	TT	TT	TT	TT	TT	TT	TT	TT	TG	TG	TT	TT	TG	TT	TT	TT	TT	TT	TT	TT	TT	TT	TT	TG	TT	TT	TT	TT	TT	TT	TT	TT
865244	G/T	Unknown	70949945	+	GG	GG	GG	GG	GT	GG	GG	GG	GG	GG	GG	GG	GG	GG	GG	GG	GG	GG	GG	GG	GG	GG	GG	GG	GG	GG	GG	GG	GG	GG	GG	GG	GG	GG	GG	GG	GG	GG	GG	GG	GG	GG	GG	GG	GG
865487	G/T	Unknown	70969901	+	GG	GG	GG	GG	GG	GT	GG	GG	GG	GG	GG	GG	GG	GG	GG	GG	GG	GG	GG	GG	GT	GG	GG	GG	GG	GG	GG	GG	GG	GG	GG	GG	GG	GG	GG	GG	GG	GG	GG	GG	GG	GG	GG	GG	GG
865569	G/C	Unknown	70976592	+	GC	GC	GC	GC	GC	GC	GC	GC	GC	GC	GC	GC	GC	GC	GC	GC	GC	GC	GC	GC	GC	GC	GC	GC	GC	GC	GC	GC	GC	GC	GC	GC	GC	GC	GC	GC	GC	GC	GC	GC	GC	GC	GC	GC	GG
865704	G/T	Unknown	70987658	+	GG	GG	GG	GG	GT	GG	GG	GG	GG	GG	GG	GG	GG	GG	GG	GG	GT	GT	GG	GG	GG	GG	GG	GT	GG	GG	GG	GG	GG	GG	GG	GG	GG	GT	GG	GG	GG	GG	GG	GT	GG	GG	GG	GG	GG
866945	G/A	Unknown	71089445	+	GA	GA	GA	GA	GA	GA	GA	GA	GA	GA	GA	GA	GA	GA	GA	GA	GA	GA	GA	GA	GA	GA	GA	GA	GA	GA	GA	GA	GA	GA	GA	GA	GA	GA	GA	GA	GA	GA	GA	GA	GA	GA	GA	GA	GA
867324	G/A	Unknown	71120555	+	GA	GA	GA	GA	GG	GA	GA	GG	GG	GG	GA	GA	AA	GA	GA	GA	GA	GA	GA	GA	GA	AA	GG	GA	GA	GA	GG	GA	GA	GG	GA	GG	GA	GA	AA	GA	GA	GA	GA	AA	GA	GA	GA	GA	GA
867324	A/G	Unknown	71120556	+	AG	AG	AG	AG	AA	AG	AG	AA	AA	AA	AG	AG	GG	AG	AG	AG	AG	AG	AG	AG	AG	GG	AA	AG	AG	AG	AA	AG	AG	AA	AG	AA	AG	AG	GG	AG	AG	AG	AG	GG	AG	AG	AG	AG	AG
867479	G/A	Unknown	71133243	+	GG	GG	GG	GG	GG	GG	GA	GG	GG	GG	GA	GG	GG	GG	GG	GG	GG	GG	GG	GG	GG	GG	GG	GG	GG	GG	GG	GA	GG	GG	GG	GG	GG	GG	GG	GG	GG	GG	GG	GG	GG	GG	GG	GG	GG
868708	T/A	Unknown	71234018	+	TT	TT	TT	TT	TT	TT	TT	TT	TT	TT	TT	TT	TT	TT	TT	TT	TT	TT	TT	TT	TT	TT	TT	TT	TT	TT	TT	TT	TA	TT	TA	AA	TT	TT	TT	TT	TT	TT	TA	TT	TT	TT	TA	TT	TT
869108	A/G	Unknown	71266784	+	AG	AG	AG	AG	AG	AG	AG	AG	AG	AG	AA	AG	AG	AG	AG	AG	AG	AG	AG	AG	AG	AA	AG	AG	AG	AG	AG	AG	AG	AG	AG	AG	AG	AG	AG	AG	AG	AA	AG	AG	AG	AG	AG	AG	AG
869203	G/A	Unknown	71274589	+	GG	GG	GG	GG	GG	GG	GA	GG	GG	GG	GG	GG	GG	GG	GG	GG	GG	GG	GG	GG	GG	GG	GG	GG	GG	GG	GG	GA	GG	GG	GG	GG	GG	GG	GG	GG	GG	GG	GG	GG	GG	GG	GG	GG	GG
869203	C/T	Unknown	71274614	+	CC	CC	CC	CC	CC	CC	CC	CC	CC	CC	CC	CC	CC	CC	CC	CC	CC	CC	CC	CC	CC	CC	CC	CC	CC	CC	CC	CC	CC	CC	CC	CC	CC	CC	CC	CC	CC	CT	CC	CC	CC	CC	CC	CC	CC
869378	C/T	Unknown	71288948	+	CC	CT	CC	CT	CC	CC	CC	CC	CC	CC	CC	CC	CC	CC	CT	CT	CC	CC	CC	CC	CC	CC	CC	CC	CC	CC	CC	CC	CC	CT	CC	CC	CC	CT	CC	CC	CT	CC	CC	CC	CC	CC	CT	CC	CC
869425	G/A	Unknown	71292790	+	GG	GG	GG	GA	GG	GG	GA	GA	GG	GG	GG	GG	GG	GG	GG	GG	GG	GG	GG	GG	GG	GG	GG	GG	GG	GG	GG	GG	GG	GG	GG	GG	GG	GG	GG	GG	GG	GG	GG	GG	GG	GG	GG	GG	GG
870174	C/A	Unknown	71354215	+	CA	CA	CA	CA	CC	CA	CA	CA	CA	CA	CC	CA	CA	CA	CA	CA	CA	CA	CA	CA	CA	CA	CA	CA	CA	CA	CA	CA	CA	CA	CA	CA	CA	CA	CA	CA	CA	CA	CA	CA	CA	CA	CA	CA	CA
870908	G/C	Unknown	71414406	+	GG	GC	GG	GC	GG	GG	GC	GG	GG	GC	GC	GG	GG	GG	GG	GC	GG	GG	GG	GG	GG	GC	GG	GG	GC	GG	GG	GG	GC	GG	GC	GG	GG	GG	GG	GG	GG	GG	GG	GG	GG	GC	GC	GG	GC
870920	G/A	Unknown	71415438	+	GG	GG	GG	GA	GA	GG	GG	GG	GG	GG	GG	GG	GG	GG	GG	GG	GG	GA	GG	GA	GG	GG	GG	GA	GG	GG	GG	GG	GG	GG	GG	GG	GG	GG	GG	GG	GG	GG	GG	GG	GA	GG	GG	GG	GG
871042	C/G	Unknown	71425445	+	CG	CG	CG	CG	CC	CG	CG	CC	CG	CG	CG	CG	CG	CG	CG	CG	CG	CG	CG	CG	CG	CG	CG	CC	CG	CG	CG	CG	CG	CC	CG	CG	CG	CG	CG	CG	CG	CG	CG	CG	CG	CG	CG	CG	CG
871709	C/A	Unknown	71480076	+	CC	CC	CC	CC	CC	CC	CA	CC	CC	CC	CC	CC	CC	CC	CC	CA	CC	CC	CC	CC	CC	CC	CC	CC	CC	CC	CC	CC	CC	CC	CC	CC	CC	CC	CC	CC	CC	CC	CC	CC	CA	CC	CC	CC	CC
871905	G/A	Unknown	71496138	+	GG	GA	GG	GG	GA	GA	GG	GA	GG	GA	GG	GG	GG	GG	GA	GG	GG	GG	GG	GG	GG	GG	GG	GA	GG	GG	GG	GG	GG	GG	GA	GG	GG	GG	GG	GG	GG	GG	GG	GG	GG	GG	GG	GA	GG
872599	G/A	Unknown	71553044	+	GG	GG	GG	GG	GG	GG	GG	GA	GG	GG	GG	GG	GG	GG	GG	GG	GG	GG	GG	GG	GG	GG	GG	GG	GG	GA	GG	GA	GG	GG	GG	GG	GG	GG	GG	GG	GG	GG	GG	GG	GG	GG	GG	GG	GG
872640	A/C	Unknown	71556432	+	AC	AC	AC	AC	AC	AC	AC	AC	AC	AC	AC	AC	AC	AC	AC	AC	AC	AC	AC	AC	AC	AC	AA	AC	AC	AC	AC	CC	AC	AC	AC	AC	AC	AC	AC	AC	AC	AC	AC	AC	AC	AC	AC	AC	AC
872640	G/A	Unknown	71556443	+	GG	GG	GG	GG	GG	GG	GG	GG	GG	GG	GG	GG	GG	GG	GG	GG	GG	GG	GG	GG	GG	GG	GG	GG	GG	GG	GG	GG	GA	GA	GG	GG	GG	GG	GG	GG	GG	GG	GG	GG	GG	GG	GG	GG	GA
872703	G/C	Unknown	71561587	+	GG	GG	GG	GG	GG	GG	GG	GG	GG	GG	GG	GG	GC	GG	GG	GG	GG	GG	GG	GG	GG	GG	GG	GG	GC	GG	GC	GC	GG	GG	GG	GG	GG	GG	GG	GG	GG	GC	GG	GC	GC	GC	GG	GG	GG
872748	G/A	Unknown	71565336	+	GA	GA	GG	GA	GG	GG	GA	GG	GA	GG	GA	GA	GA	GG	GA	GG	GG	GA	GA	GG	GA	GA	GG	GG	GA	GA	GA	GG	GA	GG	GG	GG	GA	GG	GG	GA	GA	GA	GG	GA	GG	GG	GG	GA	GG
872984	C/G	Unknown	71584661	+	CC	CC	CC	CC	CC	CG	CC	CC	CC	CC	CC	CC	CC	CC	CC	CC	CG	CC	CC	CC	CC	CC	CC	CC	CC	CC	CC	CC	CC	CC	CG	CC	CC	CC	CC	CC	CC	CC	CC	CC	CC	CC	CC	CC	CC
873065	C/G	Unknown	71591287	+	CG	CC	CC	CC	CC	CC	CG	CC	CG	CC	CG	CC	CC	CG	CC	CC	CC	CC	CC	CC	CC	CC	CC	CC	CC	CC	CC	CC	CC	CG	CC	CC	CC	CC	CC	CC	CC	CC	CC	CC	CC	CG	CC	CC	CC
873262	A/G	Unknown	71607429	+	AG	AG	AG	AG	AA	AG	AG	AG	AG	AG	AG	AG	AG	AG	AG	AG	AG	AG	AG	AG	AG	AG	AG	AG	AG	AG	AG	AG	AG	AA	AG	AA	AG	AG	AG	AG	AG	AG	AG	AG	AG	AG	AG	AG	AG
873420	G/C	Unknown	71620374	+	GG	GC	GC	GG	GG	GC	GG	GC	GG	GC	GC	GC	GC	GC	GG	GG	GG	GG	GC	GC	GC	GG	GC	GC	GC	GC	GC	GC	GC	GG	GG	GC	GG	GC	GC	GC	GC	GC	GG	GG	GC	GC	GC	GC	GC
873420	C/T	Unknown	71620385	+	CT	CT	CT	CT	CT	CC	CT	CT	CT	CC	CT	CT	CT	CT	CT	CT	CT	CT	CT	CT	CT	CT	CT	CT	CC	CC	CT	CT	CT	CT	CT	CT	CT	CC	CT	CT	CT	CC	CT	CT	CT	CT	CT	CT	CT
874666	C/G	Unknown	71722583	+	CC	CC	CC	CC	CG	CC	CG	CC	CG	CC	CC	CC	CC	CC	CC	CC	CC	CC	CC	CC	CC	CC	CC	CG	CC	CC	CC	CC	CC	CC	CC	CC	CC	CG	CG	CC	CG	CC	CC	CG	CC	CC	CC	CC	CG
875196	C/G	Unknown	71766016	+	CG	CG	CC	CG	CG	CG	CG	CG	CG	CC	CG	CG	CG	CG	CG	CG	CG	CG	CG	CG	CG	CG	CG	CC	CG	CG	CG	CG	CG	CG	CG	CG	CG	CG	CG	CG	CG	CG	CG	CC	CG	CG	CG	CG	CG
875398	C/T	Unknown	71782570	+	CT	CT	CT	CT	CT	CT	CT	CT	CT	CT	CT	CT	CT	TT	CT	CT	CT	CC	CT	CT	CT	CT	CT	CT	CT	CT	CT	CT	CT	CT	CT	CC	CT	CT	CT	CT	CT	CT	CT	CT	CT	CT	CT	CT	CT
875398	C/T	Unknown	71782600	+	CT	CT	CT	CT	CC	CT	CT	CT	CT	CT	CC	CT	CT	CC	CT	CT	CT	CT	CT	CC	CT	CT	CT	CT	CT	CT	CT	CT	CT	CT	CT	CT	CT	CT	CT	CT	CT	CT	CT	CC	CT	CT	CT	CT	CT
876358	G/A	Unknown	71861290	+	GG	GG	GG	GG	GG	GG	GA	GG	GG	GG	GG	GG	GG	GG	GG	GG	GG	GG	GG	GG	GG	GG	GG	GG	GG	GG	GG	GG	GG	GG	GG	GG	GG	GG	GG	GG	GG	GG	GG	GG	GG	GG	GG	GG	GG
876502	C/G	Unknown	71873165	+	CC	CC	CC	CC	CC	CC	CC	CG	CG	CC	CC	CC	CC	CC	CC	CC	CC	CC	CC	CC	CC	CC	CC	CC	CC	CC	CC	CC	CC	CC	CC	CC	CC	CC	CC	CC	CC	CC	CC	CC	CC	CC	CC	CC	CC
877002	G/A	Unknown	71914088	+	GG	GA	GG	GG	GA	GG	GG	GG	GG	GG	GG	GG	GG	GG	GG	GG	GG	GG	GG	GG	GA	GG	GG	GG	GA	GG	GG	GG	GG	GG	GG	GA	GG	GA	GG	GG	GG	GA	GG	GG	GA	GG	GG	GG	GG
877143	G/A	Unknown	71925697	+	GG	GG	GG	GG	GG	GG	GG	GG	GG	GG	GG	GG	GG	GG	GG	GG	GG	GA	GG	GG	GG	GG	GG	GG	GG	GG	GG	GG	GG	GG	GG	GG	GG	GG	GG	GG	GG	GG	GG	GG	GG	GG	GG	GG	GG
877802	G/A	Unknown	71979707	+	GA	GG	GG	GA	GA	GG	GG	GG	GG	GG	GG	GG	GG	GG	GG	GG	GG	GG	GG	GG	GG	GG	GG	GG	GG	GG	GG	GA	GG	GG	GG	GG	GA	GG	GG	GG	GG	GG	GG	GG	GA	GA	GA	GG	GG
877855	T/C	Unknown	71984040	+	TC	TT	TT	TT	TT	TT	TT	TC	TT	TC	TT	TT	TT	TT	TT	TT	TT	TT	TT	TT	TT	TT	TT	TT	TT	TT	TT	TT	TT	TT	TT	TT	TT	TT	TT	TT	TT	TT	TT	TT	TT	TT	TT	TT	TT
878531	T/A	Unknown	72039470	+	TT	TT	TT	TT	TT	TT	TT	TT	TT	TT	TT	TT	TT	TT	TT	TT	TT	TT	TT	TT	TT	TA	TT	TA	TT	TT	TT	TT	TT	TT	TT	TT	TT	TA	TT	TT	TT	TT	TT	TT	TT	TT	TT	TT	TT
878542	C/G	Unknown	72040369	+	CG	CG	CG	CC	CC	CC	CG	CC	CG	CC	CC	CC	CC	CC	CC	CG	CC	CC	CC	CC	CC	CC	CC	CC	CC	CC	CC	CG	CC	CC	CC	CC	CC	CC	CG	CC	CC	CC	CG	CC	CC	CC	CC	CC	CC
880024	C/T	Unknown	72161926	+	CC	CC	CT	CC	CC	CC	CC	CC	CC	CC	CC	CC	CC	CC	CC	CC	CC	CC	CC	CC	CC	CC	CC	CC	CT	CC	CC	CC	CC	CC	CT	CC	CC	CC	CC	CC	CC	CC	CC	CC	CC	CC	CC	CC	CC
880198	G/A	Unknown	72176181	+	GG	GG	GG	GG	GG	GA	GG	GG	GG	GG	GG	GG	GG	GG	GG	GG	GG	GA	GG	GG	GG	GG	GG	GG	GG	GG	GG	GA	GG	GG	GA	GG	GG	GG	GG	GG	GG	GG	GG	GA	GG	GG	GG	GG	GG
880868	G/C	Unknown	72231138	+	GG	GC	GG	CC	GC	GG	GC	GG	GG	GC	GC	GC	GG	GG	GC	GC	GC	GC	GC	GG	GC	GC	GC	GG	GC	GG	GC	GC	GG	GG	GG	GC	GG	GC	GC	GG	GC	GC	GC	GC	GC	GC	GC	GC	GC
880890	T/C	Unknown	72232935	+	TT	TT	TT	TT	TT	TT	TT	TT	TT	TT	TC	TT	TT	TT	TT	TT	TT	TT	TT	TT	TT	TT	TT	TC	TT	TC	TT	TT	TT	TT	TT	TT	TT	TC	TT	TT	TT	TC	TT	TT	TT	TT	TT	TT	TT
881623	G/T	Unknown	72293011	+	GT	GT	GT	GT	GT	GG	GT	GT	GT	GT	GG	GT	GT	GG	GT	GT	GT	GT	GT	GT	GT	GT	GT	GT	GT	GT	GT	GT	GT	GT	GT	GG	GT	GT	GT	GT	GT	GT	GT	GT	GT	GT	GT	GT	GT
881919	T/C	Unknown	72317288	+	TT	TT	TT	TT	TT	TT	TT	TT	TT	TT	TT	TT	TT	TT	TT	TT	TT	TT	TT	TT	TT	TT	TT	TT	TT	TT	TT	TT	TT	TT	TT	TT	TT	TT	TT	TT	TT	TT	TT	TT	TC	TC	TT	TT	TT
882143	G/A	Unknown	72335688	+	GG	GG	GG	GG	GG	GG	GG	GG	GG	GG	GG	GG	GG	GG	GG	GG	GG	GG	GG	GG	GG	GG	GG	GA	GG	GG	GG	GG	GG	GA	GG	GG	GG	GG	GG	GG	GG	GG	GG	GG	GG	GG	GG	GG	GG
882504	C/T	Unknown	72365309	+	CC	CC	CC	CC	CC	CC	CC	CC	CC	CT	CC	CC	CC	CC	CC	CC	CC	CC	CC	CC	CC	CC	CC	CT	CC	CC	CC	CC	CC	CC	CC	CC	CC	CC	CC	CC	CC	CC	CC	CC	CC	CC	CT	CC	CC
883373	G/T	Unknown	72436549	+	GG	GG	GG	GG	GG	GG	GG	GG	GG	GG	GG	GG	GG	GG	GG	GG	GG	GG	GG	GG	GG	GG	GG	GG	GG	GG	GG	GG	GG	GG	GG	GG	GT	GG	GG	GG	GG	GG	GT	GG	GG	GG	GG	GG	GG
883378	C/T	Unknown	72436938	+	CT	CT	CT	CT	CT	CT	CT	CT	CT	CT	CT	CT	CT	CT	CT	CT	CT	CT	CT	CT	CT	CT	CT	CT	CC	CT	CT	CT	CT	CT	CT	CT	CT	CT	CT	CT	CT	CT	CT	CT	CT	CT	CT	CT	CT
883584	G/T	Unknown	72453814	+	GG	GG	GG	GG	GG	GG	GG	GG	GT	GG	GT	GT	GG	GG	GG	GG	GG	GG	GG	GG	GG	GG	GG	GG	GG	GG	GG	GG	GG	GT	GG	GG	GG	GG	GT	GG	GG	GG	GG	GG	GG	GG	GG	GG	GG
884032	C/T	Unknown	72490577	+	CC	CC	CC	CC	CC	CC	CC	CC	CC	CC	CC	CC	CC	CC	CC	CC	CC	CC	CC	CC	CC	CC	CC	CC	CC	CC	CC	CC	CC	CT	CC	CC	CC	CC	CC	CC	CC	CC	CC	CC	CC	CC	CC	CC	CC
884570	A/G	Unknown	72534697	+	AA	AG	AA	AA	AA	AA	AA	AA	AG	AA	AA	AA	AA	AA	AA	AA	AA	AA	AA	AA	AG	AG	AG	AA	AA	AA	AA	AA	AA	AA	AA	AA	AA	AG	AA	AA	AA	AG	AA	AA	AA	AG	AA	AA	AA
884637	T/C	Unknown	72540201	+	TT	TT	TT	TT	TT	TT	TC	TT	TT	TT	TC	TT	TT	TT	TT	TT	TT	TT	TT	TT	TT	TC	TC	TT	TC	TT	TT	TT	TT	TT	TT	TT	TT	TT	TT	TT	TT	TC	TT	TT	TT	TT	TT	TT	TT
884637	T/C	Unknown	72540205	+	TT	TT	TT	TT	TT	TT	TC	TT	TT	TT	TC	TT	TT	TT	TT	TT	TT	TT	TT	TT	TT	TC	TC	TT	TC	TT	TT	TT	TT	TT	TT	TT	TT	TT	TT	TT	TT	TC	TT	TT	TT	TT	TT	TT	TT
885097	G/A	Unknown	72577949	+	GG	GG	GG	GG	GG	GG	GG	GG	GG	GG	GG	GG	GG	GG	GG	GG	GG	GA	GG	GG	GG	GG	GG	GG	GG	GG	GG	GG	GG	GG	GG	GG	GG	GG	GG	GG	GG	GG	GG	GG	GG	GG	GG	GG	GA
885457	C/G	Unknown	72607414	+	CC	CG	CG	CC	CC	CG	CC	CG	CC	CG	CG	CG	CG	CG	CC	CC	CC	CG	CG	CG	CG	CG	CG	CC	CC	CC	CC	CG	CG	CG	CG	CG	CG	CC	CG	CG	CG	CG	CG	CC	CC	CG	CC	CG	CC
885484	C/G	Unknown	72609631	+	CC	CC	CG	CG	CG	CG	CG	CG	CC	CC	CC	CG	CG	CG	CG	CG	CG	CG	CG	CG	CG	CG	CG	CG	CC	CC	CG	CG	CG	CG	CC	CG	CG	CG	CC	CG	CG	CG	CG	CG	CC	CG	CG	CG	CG
885484	T/G	Unknown	72609657	+	TT	TT	TG	TG	TG	TG	TG	TG	TT	TT	TT	TG	TG	TG	TG	TG	TG	TG	TG	TG	TG	TG	TG	TG	TT	TT	TG	TG	TG	TG	TT	TG	TG	TG	TT	TG	TG	TG	TG	TG	TT	TG	TG	TG	TG
885654	C/G	Unknown	72623582	+	CC	CC	CC	CC	CC	CC	CC	CC	CC	CC	CC	CC	CC	CC	CC	CC	CC	CC	CC	CC	CG	CC	CC	CC	CC	CC	CC	CC	CC	CC	CC	CG	CC	CC	CC	CC	CC	CC	CC	CC	CC	CC	CC	CC	CC
885680	C/T	Unknown	72625714	+	CC	CC	CC	CC	CC	CC	CC	CC	CC	CC	CC	CC	CC	CC	CT	CC	CT	CC	CC	CC	CT	CC	CC	CT	CC	CT	CT	CC	CC	CC	CC	CC	CT	CC	CC	CC	CC	CC	CT	CC	CC	CC	CT	CC	CC
885696	C/G	Unknown	72627031	+	CG	CC	CC	CG	CC	CC	CG	CC	CC	CC	CC	CC	CC	CC	CC	CC	CC	CC	CC	CC	CG	CG	CC	CC	CC	CG	CC	CC	CC	CC	CC	CC	CC	CC	CC	CC	CC	CC	CC	CC	CG	CC	CC	CC	CC
885696	T/C	Unknown	72627037	+	TT	TT	TT	TT	TT	TT	TT	TT	TT	TT	TT	TT	TT	TT	TT	TT	TT	TT	TT	TC	TT	TT	TT	TT	TT	TT	TT	TT	TC	TT	TT	TT	TT	TC	TT	TT	TT	TT	TC	TT	TT	TT	TT	TT	TT
886043	G/A	Unknown	72655466	+	GG	GG	GG	GG	GG	GG	GG	GG	GA	GG	GG	GG	GG	GG	GG	GG	GG	GG	GG	GG	GG	GG	GG	GG	GG	GG	GG	GG	GG	GG	GG	GG	GG	GG	GG	GG	GG	GG	GG	GG	GG	GA	GG	GG	GG
886125	C/T	Unknown	72662206	+	CC	CC	CC	CC	CC	CC	CC	CC	CC	CC	CT	CC	CC	CC	CC	CC	CC	CC	CC	CC	CC	CC	CT	CC	CT	CC	CC	CC	CC	CC	CC	CC	CC	CC	CC	CC	CT	CC	CC	CC	CC	CC	CC	CC	CC
886256	C/T	Unknown	72672942	+	CC	CT	CC	CC	CT	CC	CT	CC	CC	CC	CC	CC	CC	CC	CC	CC	CC	CC	CC	CC	CC	CC	CC	CC	CC	CC	CC	CC	CC	CC	CC	CC	CC	CC	CC	CC	CC	CC	CC	CC	CC	CC	CC	CC	CC
886291	G/A	Unknown	72675791	+	GA	GA	GA	GA	GA	GA	GA	GA	GA	AA	GA	GA	GA	GA	GA	GA	GA	GA	GA	GA	GA	GA	GA	GA	GA	GA	GA	GA	GA	GA	GA	GA	GA	GA	GA	GA	GA	GA	GA	GA	GA	GA	GA	GA	GA
887585	C/T	Unknown	72781898	+	CC	CC	CC	CC	CC	CC	CC	CC	CC	CC	CC	CC	CC	CC	CC	CC	CC	CC	CC	CC	CC	CC	CC	CC	CC	CC	CC	CC	CT	CC	CT	CC	CC	CC	CC	CC	CC	CC	CC	CC	CC	CC	CT	CC	CC
887777	G/A	Unknown	72797667	+	GG	GG	GG	GG	GG	GG	GG	GG	GG	GG	GG	GG	GG	GG	GG	GG	GG	GG	GG	GG	GG	GG	GG	GA	GG	GG	GG	GG	GG	GG	GG	GG	GG	GG	GG	GG	GG	GG	GG	GG	GG	GA	GG	GG	GG
887916	G/A	Unknown	72809036	+	GA	GA	GA	GA	GA	GA	GA	GA	GA	AA	GA	GA	GA	GA	GA	GA	GA	GA	GA	GA	GA	GA	GA	GA	GA	GA	GA	GA	GA	GA	GA	GA	GA	GA	GA	GA	GA	GA	GA	GA	GA	GA	GA	GA	GA
888155	T/C	Unknown	72828680	+	TC	TC	TC	TC	TC	TC	TC	TC	TC	TC	TC	TC	TC	TC	TC	TC	TC	TC	TC	TC	TC	TC	TC	TC	TC	TC	TC	TC	TC	TC	TC	TC	TC	TC	TC	TC	TC	TC	TC	TC	TC	TC	TC	TC	TC
888785	T/C	Unknown	72880322	+	TC	TC	TC	TC	TC	TC	TC	TC	TT	TC	TC	TC	TC	TC	TC	TC	TC	TC	TC	TC	TC	TC	TC	TC	TC	TC	TC	TC	TC	TC	TC	TC	TC	TC	TC	TC	TC	TT	TC	TC	TC	TT	TC	TC	TC
888981	C/T	Unknown	72896386	+	CC	CC	CC	CC	CC	CT	CC	CC	CC	CC	CT	CC	CC	CC	CC	CC	CC	CC	CC	CC	CC	CC	CC	CC	CT	CC	CC	CC	CC	CT	CC	CC	CC	CC	CC	CC	CC	CC	CC	CC	CC	CT	CT	CC	CC
889827	T/A	Unknown	72965779	+	TA	TT	TT	TT	TT	TT	TT	TT	TT	TT	TT	TT	TT	TT	TT	TT	TT	TT	TT	TT	TA	TT	TT	TT	TT	TT	TT	TT	TT	TT	TT	TT	TT	TT	TT	TT	TT	TT	TT	TT	TT	TT	TT	TT	TT
890219	G/T	Unknown	72997894	+	GG	GT	GT	GG	GG	GG	GT	GG	GG	GG	GT	GT	GT	GG	GT	GT	GG	GT	GT	GT	GT	GT	GT	GT	GT	GT	GG	GG	GT	GG	GG	GG	GG	GT	GT	GT	GT	GG	GG	GT	GG	GG	GG	GT	GG
890843	G/A	Unknown	73049060	+	GG	GG	GG	GG	GA	GG	GG	GG	GG	GG	GG	GA	GG	GG	GG	GG	GG	GG	GG	GG	GG	GG	GA	GG	GG	GG	GG	GG	GG	GG	GG	GG	GG	GG	GG	GG	GG	GG	GG	GA	GG	GG	GA	GG	GG
891055	C/T	Unknown	73066438	+	CC	CC	CC	CT	CT	CC	CT	CC	CC	CC	CT	CT	CT	CT	CT	CT	CT	CT	CT	CT	CT	CT	CC	CT	CT	CT	CT	CT	CT	CT	CC	CT	CC	CT	CT	CT	CT	CC	CT	CC	CC	CT	CT	CT	CT
891097	G/A	Unknown	73069903	+	GG	GG	GG	GG	GG	GA	GG	GG	GG	GG	GG	GG	GG	GG	GG	GG	GG	GA	GG	GG	GG	GA	GG	GG	GG	GG	GA	GG	GG	GG	GG	GG	GG	GG	GG	GG	GG	GG	GA	GG	GG	GG	GA	GG	GG
891302	C/T	Unknown	73086730	+	CC	CC	CC	CC	CC	CC	CC	CC	CC	CC	CC	CC	CC	CC	CC	CC	CC	CC	CC	CC	CC	CC	CC	CC	CC	CC	CC	CC	CC	CC	CT	CC	CT	CC	CC	CC	CC	CC	CC	CC	CC	CC	CC	CC	CC
891447	C/T	Unknown	73098585	+	CT	CC	CC	CC	CC	CC	CC	CC	CC	CC	CC	CT	CC	CC	CC	CC	CC	CC	CC	CC	CC	CC	CC	CC	CC	CC	CC	CC	CC	CC	CC	CC	CC	CT	CC	CC	CC	CC	CC	CC	CC	CT	CC	CC	CC
891575	T/A	Unknown	73109074	+	TT	TT	TT	TT	TA	TT	TA	TT	TT	TT	TT	TA	TT	TT	TA	TT	TT	TT	TT	TA	TT	TT	TT	TT	TT	TT	TT	TA	TT	TT	TT	TT	TT	TT	TT	TT	TT	TA	TA	TT	TA	TT	TT	TT	TT
892046	C/T	Unknown	73147733	+	CC	CC	CC	CT	CC	CC	CC	CT	CC	CT	CC	CC	CC	CC	CC	CC	CC	CC	CC	CC	CC	CT	CT	CT	CC	CC	CC	CC	CC	CC	CC	CC	CC	CC	CC	CC	CC	CT	CT	CC	CC	CC	CC	CC	CC
892376	C/T	Unknown	73174760	+	CC	CC	CC	CC	CC	CC	CC	CC	CC	CC	CT	CC	CT	CC	CC	CC	CC	CC	CC	CC	CC	CC	CC	CC	CC	CC	CC	CC	CT	CC	CC	CC	CC	CT	CC	CC	CC	CC	CC	CC	CT	CC	CC	CC	CC
892910	A/C	Unknown	73218552	+	AA	AA	AA	AA	AA	AC	AA	AA	AA	AA	AA	AC	AA	AA	AA	AC	AA	AC	AA	AA	AA	AC	AA	AA	AA	AA	AA	AA	AA	AC	AA	AA	AA	AA	AA	AA	AA	AA	AA	AA	AA	AA	AC	AA	AA
892910	T/C	Unknown	73218579	+	TT	TT	TT	TT	TT	TC	TT	TT	TT	TT	TT	TC	TT	TT	TT	TC	TT	TC	TT	TT	TT	TC	TT	TT	TT	TT	TT	TT	TT	TC	TT	TT	TT	TT	TT	TT	TT	TT	TT	TT	TT	TT	TC	TT	TT
893066	G/A	Unknown	73231359	+	GG	GG	GG	GG	GG	GG	GG	GG	GG	GG	GG	GG	GG	GG	GG	GG	GG	GG	GG	GG	GG	GA	GG	GG	GG	GG	GG	GG	GG	GG	GG	GG	GG	GA	GG	GG	GG	GG	GG	GG	GG	GG	GG	GG	GG
893204	G/A	Unknown	73242660	+	GG	GG	GA	GG	GA	GA	GG	GG	GA	GA	GA	GA	GA	GA	GG	GG	GA	GA	GA	GG	GA	GA	GA	GG	GG	GG	GA	GG	GA	GG	GG	GA	GG	GG	GA	GA	GG	GG	GG	GG	GG	GG	GG	GA	GA
893277	C/T	Unknown	73248670	+	CT	CT	CT	CT	CT	CT	CT	CT	CT	CT	CT	CT	CT	CT	CT	CT	CT	CT	CT	CT	CT	CT	CT	CT	CT	CT	CT	CT	CT	CT	CT	CT	CT	CT	CT	CT	CT	CT	CT	CT	CT	CT	CT	CT	CT
893334	C/T	Unknown	73253340	+	CC	CC	CC	CC	CC	CC	CC	CC	CC	CC	CC	CC	CC	CC	CC	CC	CC	CC	CC	CC	CC	CC	CC	CC	CC	CC	CT	CC	CC	CC	CT	CC	CC	CC	CC	CC	CC	CC	CC	CC	CC	CT	CC	CC	CT
893334	C/T	Unknown	73253347	+	CC	CC	CC	CC	CC	CC	CC	CC	CC	CC	CC	CC	CC	CC	CC	CC	CC	CC	CC	CC	CC	CC	CC	CC	CC	CC	CC	CC	CC	CC	CC	CC	CC	CC	CC	CC	CC	CC	CC	CC	CC	CT	CC	CC	CC
893334	G/A	Unknown	73253355	+	GA	GG	GG	GG	GG	GG	GG	GG	GG	GG	GG	GG	GG	GG	GG	GG	GG	GG	GG	GG	GG	GG	GG	GG	GG	GG	GG	GG	GG	GG	GG	GG	GA	GG	GG	GG	GG	GG	GG	GG	GG	GG	GA	GG	GG
893485	C/A	Unknown	73265713	+	CC	CC	CC	CC	CC	CC	CC	CC	CC	CC	CC	CC	CC	CC	CC	CC	CC	CC	CC	CC	CC	CC	CC	CC	CC	CC	CC	CC	CC	CC	CC	CC	CC	CC	CC	CC	CC	CC	CC	CC	CC	CC	CC	CC	CC
894202	C/T	Unknown	73324493	+	CT	CT	CT	CT	CT	CT	CT	CT	CT	CC	CT	CT	CT	CT	CT	CT	CT	CT	CT	CT	CT	CT	CT	CT	CT	CT	CT	CC	CT	CC	CT	CT	CT	CT	CT	CT	CC	CT	CC	CT	CT	CT	CT	CT	CT
894247	G/A	Unknown	73328206	+	GG	GG	GG	GG	GG	GA	GG	GG	GG	GG	GG	GG	GG	GG	GG	GG	GG	GG	GG	GG	GG	GG	GG	GG	GG	GA	GG	GG	GG	GA	GG	GG	GG	GG	GG	GG	GG	GG	GA	GG	GG	GG	GG	GG	GG
894322	C/G	Unknown	73334344	+	CC	CC	CC	CC	CC	CC	CC	CC	CG	CC	CC	CC	CC	CC	CG	CC	CC	CC	CC	CC	CC	CC	CC	CC	CC	CC	CG	CC	CC	CG	CG	CC	CC	CC	CC	CC	CC	CC	CC	CC	CC	CG	CC	CC	CC
894480	A/G	Unknown	73347285	+	AG	AG	AG	AG	AG	AG	AG	AG	AG	AG	AG	AG	AG	AG	AG	AG	AG	AG	AG	AG	AG	AA	AG	AG	AG	AG	AA	AG	AG	AG	AG	AA	AG	AG	AG	AG	AG	AG	AG	AG	AG	AG	AG	AG	AG
894480	C/T	Unknown	73347307	+	CC	CC	CC	CC	CC	CT	CC	CT	CC	CC	CC	CC	CC	CC	CC	CC	CT	CT	CC	CC	CC	CC	CC	CC	CC	CC	CC	CC	CC	CC	CT	CC	CC	CC	CC	CC	CC	CC	CC	CT	CC	CC	CC	CC	CC
894676	C/A	Unknown	73363373	+	CC	CC	CC	CC	CC	CC	CC	CC	CC	CC	CC	CC	CC	CC	CC	CC	CA	CC	CC	CA	CC	CC	CC	CA	CC	CA	CC	CC	CC	CC	CC	CC	CC	CC	CC	CC	CC	CC	CC	CC	CC	CC	CA	CC	CC
895001	G/C	Unknown	73390029	+	GC	GG	GG	GG	GG	GG	GG	GG	GG	GG	GG	GG	GG	GG	GG	GC	GG	GC	GG	GG	GG	GG	GG	GG	GG	GG	GG	GG	GG	GG	GG	GG	GG	GG	GG	GG	GG	GG	GG	GG	GG	GG	GC	GG	GG
895271	G/T	Unknown	73412151	+	GG	GG	GT	GT	GT	GT	GT	GT	GT	GT	GT	GT	GG	GG	GT	GT	GT	GT	GT	GG	GT	GT	GT	GT	GT	GT	GT	GT	GT	GG	GT	GT	GT	GT	GT	GT	GT	GT	GT	GT	GT	GT	GT	GT	GT
895271	A/G	Unknown	73412182	+	AG	AG	AG	AG	AG	AG	AG	AG	AG	AG	AG	AG	AG	AG	AG	AA	AG	AG	AG	AG	AG	AG	AG	AG	AG	AG	AG	AG	AG	AG	AG	AG	AG	AG	AG	AG	AG	AG	AG	AG	AA	AG	AG	AG	AG
895521	G/A	Unknown	73432655	+	GA	GG	GG	GG	GG	GG	GG	GG	GG	GG	GG	GG	GG	GG	GG	GG	GG	GG	GG	GG	GG	GG	GG	GG	GG	GA	GG	GG	GG	GG	GA	GG	GG	GG	GG	GG	GG	GG	GG	GG	GG	GG	GG	GG	GG
895767	G/A	Unknown	73452847	+	GG	GG	GG	GG	GG	GG	GG	GG	GA	GG	GG	GG	GG	GG	GG	GG	GG	GG	GG	GG	GG	GA	GG	GG	GG	GG	GA	GG	GA	GG	GG	GG	GG	GG	GG	GG	GG	GG	GA	GA	GG	GG	GG	GG	GG
896397	G/C	Unknown	73504498	+	GG	GG	GG	GG	GG	GG	GC	GG	GG	GG	GG	GG	GG	GG	GG	GG	GG	GG	GG	GG	GG	GG	GC	GC	GG	GG	GG	GG	GG	GG	GG	GG	GG	GC	GG	GG	GG	GG	GG	GG	GG	GG	GG	GG	GG
896490	C/G	Unknown	73512136	+	CC	CC	CC	CC	CC	CC	CC	CC	CC	CC	CC	CC	CC	CC	CC	CC	CC	CC	CC	CC	CC	CG	CC	CC	CC	CC	CC	CC	CC	CG	CC	CC	CC	CC	CC	CC	CC	CC	CG	CC	CC	CC	CG	CC	CC
898094	G/A	Unknown	73643642	+	GA	GA	GG	GA	GA	GA	GA	GA	GA	GA	GA	GA	GA	GA	GA	GA	GA	GA	GA	GA	GA	GA	GA	GA	GA	GA	GA	GA	GA	GA	GA	GA	GA	GA	GA	GA	GA	GA	GA	GA	GA	GA	GA	GA	GA
898277	C/G	Unknown	73658672	+	CG	CG	CG	CG	CG	CG	CC	CC	CC	CG	CG	CG	CG	CG	CG	CG	CG	CG	CG	CG	CG	CG	CC	CG	CG	CG	CG	CG	CG	CG	CG	CC	CG	CC	CG	CG	CC	CG	CG	CC	CG	CG	CG	CG	CG
898376	T/G	Unknown	73666776	+	TG	TG	TG	TG	TG	TG	TG	TG	TG	TT	TG	TG	TG	TG	TG	TG	TG	TG	TG	TG	TT	TG	TG	TG	TG	TG	TG	TT	TG	TG	TG	TG	TG	TG	TG	GG	TG	TG	TG	TG	TG	TG	TG	TG	TG
898376	C/T	Unknown	73666790	+	CC	CC	CC	CC	CC	CT	CC	CC	CC	CC	CC	CC	CC	CC	CT	CC	CC	CC	CC	CC	CC	CC	CC	CC	CC	CC	CC	CC	CT	CC	CC	CC	CC	CT	CC	CC	CC	CC	CC	CC	CC	CT	CC	CC	CC
899255	A/G	Unknown	73738860	+	AA	AA	AA	AA	AA	AA	AG	AA	AA	AA	AA	AA	AA	AA	AA	AA	AA	AA	AA	AA	AA	AA	AA	AA	AA	AA	AA	AA	AA	AA	AA	AA	AA	AA	AA	AA	AA	AA	AG	AA	AA	AA	AG	AA	AA
899345	C/G	Unknown	73746219	+	CC	CC	CC	CC	CC	CC	CC	CC	CC	CC	CC	CC	CC	CC	CC	CC	CC	CG	CC	CC	CC	CC	CC	CC	CC	CC	CC	CC	CC	CC	CC	CC	CC	CC	CC	CC	CC	CC	CC	CC	CC	CC	CG	CC	CC
900168	C/G	Unknown	73813703	+	CC	CC	CC	CC	CG	CC	CC	CC	CC	CC	CC	CC	CC	CC	CC	CC	CC	CC	CC	CC	CC	CC	CC	CG	CC	CC	CC	CC	CC	CC	CC	CC	CC	CC	CC	CC	CC	CC	CC	CC	CC	CC	CC	CC	CC
900835	C/T	Unknown	73868396	+	CC	CT	CC	CC	CC	CC	CC	CC	CC	CC	CT	CT	CC	CC	CC	CC	CC	CC	CC	CC	CC	CC	CC	CC	CC	CC	CC	CC	CC	CT	CC	CC	CC	CC	CC	CC	CT	CC	CC	CC	CC	CC	CC	CC	CC
901292	T/A	Unknown	73905882	+	TT	TT	TT	TT	TT	TT	TT	TT	TT	TT	TT	TT	TT	TT	TT	TT	TT	TT	TT	TT	TT	TT	TT	TT	TT	TT	TT	TT	TT	TT	TT	TT	TT	TT	TT	TT	TT	TT	TT	TT	TT	TT	TT	TT	TT
902547	C/A	Unknown	74008812	+	CC	CC	CA	CC	CC	CC	CC	CC	CC	CC	CC	CA	CC	CC	CC	CC	CC	CC	CC	CC	CC	CC	CC	CC	CC	CC	CC	CC	CC	CC	CC	CC	CC	CC	CA	CC	CC	CC	CC	CC	CC	CA	CC	CC	CC
903228	G/A	Unknown	74064623	+	GA	GG	GG	GG	GG	GG	GG	GG	GG	GA	GG	GG	GA	GG	GG	GG	GG	GG	GG	GG	GG	GG	GG	GG	GA	GG	GG	GG	GG	GG	GG	GA	GG	GG	GG	GA	GG	GG	GG	GG	GA	GG	GG	GG	GG
903457	G/A	Unknown	74083426	+	GG	GG	GG	GG	GG	GG	GG	GG	GA	GG	GA	GG	GA	GG	GG	GG	GG	GG	GG	GG	GG	GG	GG	GG	GG	GA	GG	GG	GG	GG	GA	GG	GG	GG	GA	GG	GG	GG	GG	GG	GG	GG	GG	GG	GG
904385	G/C	Unknown	74159515	+	GC	GG	GC	GG	GC	GC	GC	GC	GC	GC	GC	GC	GC	GC	GC	GC	GC	GC	GC	GC	GC	GC	GC	GC	GC	GC	GC	GC	GC	GC	GC	GC	GC	GC	GC	GC	GC	GC	GC	GC	GC	GC	GC	GC	GC
905038	T/C	Unknown	74213054	+	TT	TT	TT	TT	TT	TT	TT	TT	TT	TC	TT	TT	TT	TT	TT	TT	TT	TT	TT	TT	TT	TT	TT	TT	TT	TT	TT	TT	TT	TT	TT	TT	TT	TT	TT	TT	TT	TT	TT	TT	TT	TT	TT	TT	TT
905147	G/A	Unknown	74222016	+	GG	GG	GG	GG	GG	GG	GG	GA	GG	GG	GG	GG	GG	GG	GG	GA	GG	GG	GG	GG	GG	GG	GA	GA	GG	GG	GG	GG	GG	GG	GG	GG	GG	GG	GG	GG	GG	GG	GG	GG	GG	GG	GG	GG	GG
905491	G/A	Unknown	74250191	+	GG	GG	GG	GG	GG	GG	GG	GG	GG	GG	GG	GG	GG	GG	GG	GG	GG	GG	GG	GG	GG	GG	GA	GG	GG	GG	GG	GG	GG	GG	GG	GG	GG	GG	GG	GG	GG	GG	GG	GG	GG	GG	GG	GG	GG
905491	T/C	Unknown	74250237	+	TT	TT	TT	TT	TT	TT	TT	TT	TT	TC	TT	TT	TT	TT	TT	TT	TT	TT	TT	TT	TT	TT	TC	TT	TT	TT	TT	TT	TT	TT	TT	TT	TT	TT	TT	TT	TT	TT	TT	TT	TT	TT	TT	TT	TT
905675	G/A	Unknown	74265282	+	GG	GG	GG	GG	GG	GG	GG	GG	GA	GG	GG	GG	GG	GG	GG	GG	GG	GG	GG	GG	GG	GG	GG	GG	GG	GG	GG	GG	GG	GG	GG	GG	GG	GG	GG	GG	GG	GG	GG	GG	GG	GG	GG	GG	GG
905675	T/C	Unknown	74265284	+	TT	TT	TT	TT	TT	TT	TT	TT	TT	TT	TT	TT	TT	TT	TT	TT	TT	TT	TT	TC	TT	TT	TT	TT	TT	TT	TT	TT	TT	TC	TC	TT	TT	TT	TT	TT	TT	TT	TC	TT	TT	TT	TT	TT	TT
906665	T/C	Unknown	74346466	+	TT	TT	TT	TT	TT	TT	TT	TT	TT	TT	TT	TC	TT	TT	TT	TC	TT	TC	TT	TT	TT	TT	TT	TT	TT	TT	TT	TT	TT	TC	TT	TT	TT	TT	TT	TT	TT	TT	TT	TT	TT	TT	TT	TT	TT
906770	A/G	Unknown	74355079	+	AA	AA	AG	AG	AA	AG	AA	AA	AA	AG	AA	AG	AG	AG	AA	AG	AG	AG	AG	AG	AA	AG	AG	AG	AA	AA	AA	AA	AA	AA	AA	AA	AG	AG	AG	AG	AA	AG	AG	AG	AG	AG	AA	AG	AA
907715	C/T	Unknown	74432604	+	CT	CC	CC	CC	CC	CC	CC	CC	CC	CT	CC	CC	CC	CC	CC	CC	CC	CC	CC	CC	CC	CC	CC	CC	CC	CT	CC	CC	CC	CC	CC	CC	CC	CC	CC	CC	CC	CC	CC	CC	CC	CC	CC	CC	CC
909026	C/T	Unknown	74540061	+	CT	CT	CT	CT	CT	CT	CT	CT	CT	CC	CT	CT	CT	CT	CT	CT	CT	CT	CT	CT	CT	CT	CT	CC	CT	CT	CC	CT	CT	CT	CT	CT	CT	CT	CT	CT	CT	CT	CT	CT	CT	CT	CT	CT	CT
909026	G/C	Unknown	74540092	+	GC	GC	GC	GC	GC	GC	GC	GC	GC	GG	GC	GC	GC	GC	GC	GC	GC	GC	GC	GC	GC	GC	GC	GG	GC	GC	GG	GC	GC	GC	GC	GC	GC	GC	GC	GC	GC	GC	GC	GC	GC	GC	GC	GC	GC
910226	T/A	Unknown	74638471	+	TT	TA	TT	TT	TT	TT	TT	TT	TT	TT	TT	TT	TT	TT	TT	TT	TT	TT	TT	TT	TT	TT	TT	TT	TT	TT	TT	TT	TT	TT	TA	TT	TT	TT	TT	TT	TT	TT	TT	TT	TT	TT	TT	TT	TT
910405	G/C	Unknown	74653138	+	GC	GC	GC	GC	GC	GC	GC	GC	GC	GC	GC	GC	GC	GC	GC	GC	GC	GC	GC	GC	GC	GC	GC	GC	GC	GC	GC	GC	GC	GC	GC	GC	GC	GC	GC	GC	GC	GC	GC	GC	GC	GC	GC	GC	GC
910439	G/T	Unknown	74655930	+	GG	GT	GG	GT	GG	GG	GG	GG	GG	GT	GG	GG	GG	GG	GG	GT	GG	GG	GG	GG	GG	GT	GG	GG	GG	GG	GT	GT	GG	GG	GT	GG	GG	GG	GG	GG	GG	GG	GG	GG	GG	GT	GG	GG	GG
910878	G/C	Unknown	74691956	+	GG	GG	GG	GG	GG	GG	GG	GG	GG	GG	GG	GG	GG	GG	GG	GG	GC	GG	GG	GG	GG	GG	GG	GG	GG	GG	GG	GG	GG	GG	GG	GG	GG	GG	GG	GC	GG	GG	GG	GG	GG	GG	GG	GG	GG
912090	C/T	Unknown	74791324	+	CC	CC	CC	CC	CC	CC	CC	CC	CC	CC	CC	CC	CC	CC	CC	CC	CC	CC	CC	CC	CC	CC	CC	CC	CC	CC	CC	CC	CC	CT	CC	CC	CC	CC	CC	CC	CC	CC	CC	CC	CC	CC	CC	CC	CC
912179	A/T	Unknown	74798612	+	AA	AA	AA	AA	AA	AA	AA	AA	AA	AA	AA	AA	AA	AA	AA	AA	AA	AA	AA	AA	AA	AA	AA	AA	AA	AA	AA	AA	AA	AT	AA	AA	AA	AA	AA	AA	AA	AA	AA	AA	AA	AA	AA	AA	AA
913352	G/C	Unknown	74894804	+	GC	GC	GC	GC	GG	GC	GC	GC	GC	GC	GC	GC	GC	GC	GC	GC	GC	GC	GC	GC	GC	GC	GC	GC	GC	GC	GG	GC	GC	GC	GC	GC	GG	GG	GC	GC	GC	GC	GC	GC	GC	GC	GG	GC	GC
913365	G/T	Unknown	74895885	+	GG	GT	GG	GG	GG	GG	GG	GG	GT	GG	GG	GG	GG	GG	GG	GG	GG	GG	GG	GG	GG	GG	GG	GG	GT	GG	GG	GG	GG	GG	GT	GG	GG	GG	GG	GG	GG	GG	GG	GG	GG	GG	GG	GG	GG
913800	G/A	Unknown	74931551	+	GG	GG	GG	GG	GG	GG	GA	GG	GG	GG	GG	GG	GG	GG	GG	GG	GG	GA	GG	GG	GG	GG	GG	GG	GA	GG	GG	GG	GG	GG	GG	GG	GG	GG	GA	GG	GG	GG	GG	GG	GG	GG	GG	GG	GG
913922	A/G	Unknown	74941530	+	AG	AG	AG	AG	AG	AG	AG	AG	AG	AA	AG	AG	AG	AG	AG	AG	AG	AG	AG	AG	AG	AG	AG	AG	AG	AG	AG	AG	AG	AG	AG	AG	AG	AG	AG	AG	AG	AG	AG	AG	AG	AG	AG	AG	AG
913922	A/C	Unknown	74941551	+	CA	CA	CA	CA	CA	CA	CA	CA	CA	CC	CA	CA	CA	CA	CA	CA	CA	CA	CA	CA	CA	CA	CA	CA	CA	CA	CA	CA	CA	CA	CA	CA	CA	CA	CA	CA	CA	CA	CA	CA	CA	CA	CA	CA	CA
914619	T/C	Unknown	74998719	+	TT	TC	TT	TT	TT	TC	TT	TT	TT	TT	TT	TT	TT	TT	TT	TT	TT	TC	TT	TT	TT	TT	TT	TT	TC	TT	TT	TT	TC	TT	TT	TT	TT	TT	TT	TT	TT	TT	TT	TT	TT	TT	TC	TT	TT
914967	G/C	Unknown	75027218	+	GG	GG	GG	GG	GG	GG	GG	GG	GG	GG	GG	GG	GG	GG	GG	GG	GG	GG	GG	GG	GC	GG	GG	GG	GG	GG	GG	GG	GG	GG	GG	GG	GG	GG	GG	GG	GG	GG	GG	GG	GG	GG	GG	GG	GG
915996	G/C	Unknown	75111611	+	GG	GG	GG	GG	GG	GG	GG	GG	GC	GG	GG	GG	GG	GC	GC	GG	GG	GG	GG	GG	GG	GG	GC	GG	GG	GG	GG	GC	GG	GG	GG	GG	GG	GG	GG	GG	GG	GG	GG	GG	GC	GG	GG	GG	GG
916401	C/T	Unknown	75144824	+	CC	CC	CC	CC	CC	CC	CT	CC	CT	CC	CC	CC	CC	CC	CC	CC	CC	CC	CC	CC	CC	CC	CT	CC	CC	CC	CC	CC	CC	CC	CC	CC	CC	CC	CC	CC	CC	CC	CC	CC	CC	CC	CC	CC	CC
916699	C/T	Unknown	75169258	+	CC	CC	CC	CC	CC	CC	CC	CC	CC	CC	CT	CC	CC	CC	CC	CC	CC	CC	CC	CC	CC	CC	CT	CC	CC	CC	CC	CC	CC	CT	CC	CC	CT	CC	CT	CC	CC	CT	CC	CC	CC	CC	CC	CC	CC
916941	C/T	Unknown	75189123	+	CC	CC	CC	CC	CT	CC	CC	CT	CT	CC	CC	CT	CC	CC	CT	CC	CC	CC	CC	CC	CC	CC	CC	CC	CC	CC	CC	CC	CC	CC	CC	CC	CC	CT	CC	CC	CC	CT	CC	CC	CC	CC	CC	CC	CC
917195	C/T	Unknown	75209917	+	CT	CT	CT	CT	CC	CT	CT	CT	CC	CT	CT	CC	CT	CT	CT	CT	CT	CT	CT	CC	CT	CT	CT	CT	CC	CT	CT	CT	CT	CT	CT	CC	CT	CT	CC	CT	CC	CT	CC	CT	CT	CT	CT	CT	CT
917528	C/T	Unknown	75237269	+	CC	CC	CC	CC	CC	CC	CT	CT	CC	CC	CC	CC	CC	CC	CC	CC	CT	CC	CC	CC	CC	CC	CC	CC	CC	CT	CC	CC	CC	CC	CT	CC	CC	CC	CC	CC	CC	CC	CC	CT	CC	CC	CT	CC	CC
918269	G/A	Unknown	75298009	+	GG	GA	GG	GG	GA	GG	GG	GG	GG	GG	GG	GG	GG	GG	GG	GG	GG	GA	GG	GG	GG	GG	GG	GG	GG	GG	GG	GA	GG	GG	GA	GG	GG	GG	GG	GG	GG	GG	GG	GG	GG	GG	GG	GG	GG
919072	G/A	Unknown	75363871	+	GG	GA	GG	GG	GG	AA	GG	GA	GG	GA	GA	GG	GA	AA	AA	GG	GG	GA	GG	GA	GG	AA	GG	GG	GG	AA	GA	GG	GG	GG	GG	GG	GG	GA	GG	GG	GG	GA	GA	GG	GA	GA	GA	GA	GG
919213	A/G	Unknown	75375405	+	AA	AA	AA	AA	AA	AA	AA	AG	AA	AA	AA	AA	AG	AA	AA	AA	AA	AA	AA	AA	AA	AA	AA	AA	AA	AA	AA	AG	AA	AA	AA	AA	AA	AA	AA	AA	AA	AA	AA	AA	AA	AA	AA	AA	AA
921487	C/T	Unknown	75561916	+	CC	CC	CC	CC	CC	CT	CC	CC	CT	CC	CC	CC	CT	CC	CC	CC	CC	CC	CC	CC	CC	CT	CT	CC	CC	CC	CC	CC	CC	CC	CC	CC	CC	CC	CC	CC	CC	CC	CC	CC	CT	CC	CC	CC	CC
922031	G/T	Unknown	75606487	+	GG	GG	GG	GG	GG	GG	GG	GG	GG	GG	GG	GG	GG	GG	GT	GG	GG	GG	GG	GG	GG	GG	GG	GG	GT	GG	GG	GG	GG	GG	GG	GG	GG	GG	GG	GG	GG	GT	GG	GG	GG	GG	GG	GG	GT
922079	G/T	Unknown	75610431	+	GG	GG	GG	GG	GG	GG	GG	GG	GG	GG	GG	GG	GG	GG	GG	GG	GG	GG	GG	GG	GG	GG	GG	GG	GG	GG	GT	GG	GG	GG	GG	GT	GG	GG	GG	GG	GG	GT	GG	GG	GG	GG	GG	GG	GG
922112	C/T	Unknown	75613152	+	CC	CC	CC	CC	CC	CC	CC	CC	CC	CC	CC	CC	CC	CC	CT	CC	CC	CC	CC	CC	CC	CC	CC	CC	CC	CC	CC	CC	CC	CC	CC	CC	CC	CC	CC	CC	CC	CC	CC	CC	CC	CC	CC	CC	CC
922767	T/A	Unknown	75666848	+	TT	TT	TT	TT	TT	TT	TT	TT	TT	TT	TT	TT	TT	TT	TT	TT	TT	TT	TT	TT	TT	TT	TT	TT	TT	TT	TT	TA	TT	TT	TT	TT	TT	TA	TT	TT	TT	TT	TT	TT	TA	TT	TT	TT	TA
923077	G/C	Unknown	75692263	+	GG	GG	GG	GG	GG	GG	GG	GG	GG	GG	GG	GG	GG	GG	GG	GG	GG	GG	GG	GG	GG	GG	GG	GG	GG	GG	GG	GG	GG	GG	GG	GG	GG	GG	GG	GG	GG	GG	GG	GG	GG	GG	GG	GG	GG
923077	G/T	Unknown	75692269	+	GG	GG	GG	GG	GG	GG	GG	GG	GG	GG	GG	GG	GG	GG	GG	GG	GT	GG	GG	GG	GG	GG	GG	GT	GG	GG	GG	GG	GG	GG	GG	GG	GG	GG	GG	GG	GG	GG	GT	GG	GG	GG	GT	GG	GG
923351	C/T	Unknown	75714709	+	CC	CC	CC	CC	CC	CC	CC	CC	CC	CC	CC	CC	CC	CC	CT	CC	CC	CC	CC	CC	CC	CC	CC	CC	CC	CC	CT	CC	CC	CC	CC	CC	CC	CT	CC	CC	CC	CC	CC	CC	CC	CC	CT	CC	CC
923829	C/T	Unknown	75753924	+	CT	CC	CC	CC	CC	CT	CT	CC	CC	CC	CC	CC	CC	CC	CC	CC	CC	CC	CC	CC	CC	CC	CT	CC	CC	CC	CC	CC	CC	CT	CC	CT	CC	CT	CC	CC	CC	CC	CT	CT	CT	CC	CT	CC	CT
925084	C/T	Unknown	75856836	+	CC	CC	CC	CC	CC	CC	CC	CC	CT	CC	CC	CC	CC	CC	CC	CC	CC	CC	CC	CC	CC	CC	CC	CC	CT	CC	CC	CC	CC	CC	CC	CC	CC	CC	CC	CC	CT	CC	CC	CC	CC	CC	CC	CC	CC
925704	C/A	Unknown	75907662	+	CC	CC	CC	CA	CC	CA	CC	CC	CC	CC	CC	CC	CA	CC	CC	CC	CC	CC	CC	CC	CC	CC	CC	CC	CC	CC	CC	CC	CC	CC	CA	CA	CC	CC	CC	CC	CC	CC	CC	CC	CC	CC	CC	CC	CC
925704	C/T	Unknown	75907668	+	CC	CC	CC	CT	CC	CT	CC	CC	CC	CC	CC	CC	CT	CC	CC	CC	CC	CC	CC	CC	CC	CC	CC	CC	CC	CC	CC	CC	CC	CC	CT	CT	CC	CC	CC	CC	CC	CC	CC	CC	CC	CC	CC	CC	CC
926070	T/G	Unknown	75937683	+	TT	TT	TT	TT	TT	TT	TT	TT	TT	TG	TT	TT	TT	TT	TT	TT	TT	TT	TT	TT	TT	TT	TT	TT	TT	TT	TT	TG	TT	TT	TT	TT	TT	TT	TT	TT	TT	TT	TT	TT	TT	TT	TT	TT	TT
926140	C/G	Unknown	75943412	+	CG	CC	CC	CC	CC	CC	CC	CC	CC	CC	CC	CC	CC	CC	CC	CC	CG	CC	CC	CC	CC	CC	CC	CC	CC	CC	CC	CG	CC	CC	CC	CC	CC	CC	CC	CC	CC	CC	CC	CC	CC	CC	CC	CC	CC
926140	G/T	Unknown	75943420	+	GG	GG	GG	GT	GG	GG	GT	GT	GT	GG	GG	GG	GG	GG	GG	GG	GG	GG	GG	GG	GG	GG	GG	GG	GG	GG	GG	GG	GG	GG	GG	GG	GG	GT	GG	GG	GG	GG	GG	GG	GG	GG	GG	GG	GG
927608	G/A	Unknown	76063786	+	GG	GG	GG	GG	GG	GG	GG	GG	GG	GG	GG	GG	GG	GG	GG	GG	GG	GG	GG	GA	GG	GA	GG	GG	GG	GA	GG	GG	GG	GG	GG	GG	GG	GG	GG	GG	GG	GG	GA	GG	GG	GG	GG	GG	GG
927944	T/A	Unknown	76091358	+	TT	TT	TT	TT	TT	TT	TT	TT	TT	TT	TT	TT	TT	TT	TT	TT	TT	TT	TT	TT	TT	TT	TT	TT	TT	TA	TT	TT	TT	TT	TT	TT	TT	TT	TT	TT	TT	TT	TT	TT	TT	TA	TT	TT	TT
928456	C/T	Unknown	76133335	+	CC	CC	CC	CC	CC	CC	CC	CC	CC	CC	CC	CC	CC	CC	CC	CC	CC	CC	CC	CC	CC	CC	CC	CC	CC	CC	CC	CC	CC	CC	CC	CC	CC	CT	CC	CC	CC	CC	CT	CC	CC	CC	CC	CC	CC
928700	G/A	Unknown	76153331	+	GA	GG	GG	GG	GG	GG	GA	GG	GA	GG	GG	GG	GG	GG	GG	GG	GG	GG	GG	GG	GG	GA	GG	GG	GG	GG	GG	GG	GG	GG	GG	GG	GA	GG	GG	GG	GG	GG	GG	GG	GG	GG	GG	GG	GG
928700	A/G	Unknown	76153354	+	AG	AA	AA	AA	AA	AA	AG	AA	AG	AA	AA	AA	AA	AA	AA	AA	AA	AA	AA	AA	AA	AG	AA	AA	AA	AA	AA	AA	AA	AA	AA	AA	AG	AA	AA	AA	AA	AA	AA	AA	AA	AA	AA	AA	AA
929002	G/T	Unknown	76178096	+	GG	GG	GG	GG	GG	GG	GG	GG	GG	GG	GG	GG	GG	GG	GG	GT	GG	GG	GG	GG	GG	GG	GG	GG	GG	GG	GG	GG	GG	GG	GG	GT	GG	GG	GG	GG	GG	GG	GG	GG	GG	GG	GT	GG	GG
929019	G/A	Unknown	76179492	+	GG	GG	GG	GG	GA	GA	GG	GG	GG	GA	GA	GA	GG	GG	GA	GG	GG	GG	GG	GG	GG	GA	GG	GG	GG	GG	GA	GG	GA	GG	GG	GG	GG	GG	GA	GG	GG	GG	GG	GG	GG	GA	GA	GG	GG
929159	G/C	Unknown	76191012	+	GG	GC	GG	GG	GG	GG	GG	GG	GG	GG	GG	GC	GG	GG	GG	GG	GG	GG	GG	GG	GG	GG	GG	GG	GG	GG	GG	GG	GG	GC	GG	GG	GG	GG	GG	GG	GG	GG	GG	GG	GG	GG	GG	GG	GG
929181	C/T	Unknown	76192777	+	CC	CC	CT	CT	CT	CC	CC	CC	CT	CC	CT	CT	CT	CT	CC	CC	CC	CT	CT	CT	CT	CC	CT	CT	CC	CT	CC	CC	CC	CC	CT	CC	CC	CC	CT	CT	CT	CC	CT	CT	CC	CC	CC	CT	CT
929323	C/G	Unknown	76204438	+	CC	CG	CC	CC	CG	CC	CC	CC	CG	CC	CC	CC	CC	CC	CC	CC	CC	CC	CC	CC	CC	CC	CG	CC	CC	CC	CC	CC	CC	CC	CC	CC	CC	CC	CG	CC	CC	CC	CC	CC	CC	CC	CC	CC	CC
929323	G/C	Unknown	76204441	+	GG	GC	GG	GG	GG	GG	GG	GG	GG	GC	GG	GG	GG	GG	GC	GG	GG	GG	GG	GG	GG	GC	GC	GG	GG	GG	GG	GG	GG	GG	GG	GG	GG	GG	GC	GG	GG	GG	GG	GG	GG	GG	GG	GG	GG
931148	C/T	Unknown	76354079	+	CT	CC	CC	CC	CC	CC	CC	CC	CC	CC	CC	CC	CC	CC	CC	CC	CC	CT	CC	CC	CC	CC	CC	CC	CC	CC	CC	CC	CC	CT	CT	CT	CC	CT	CC	CC	CC	CC	CC	CC	CC	CC	CC	CC	CC
931182	G/A	Unknown	76356851	+	GG	GA	GG	GG	GG	GG	GG	GG	GG	GG	GG	GG	GG	GG	GG	GG	GA	GG	GG	GG	GG	GG	GG	GG	GG	GG	GG	GG	GG	GG	GG	GG	GG	GG	GG	GG	GG	GG	GA	GG	GG	GG	GA	GG	GG
931267	A/G	Unknown	76363822	+	AG	AG	AG	AG	AG	AG	AA	AG	AG	AG	AG	AG	AG	AG	AG	AG	AA	AG	AG	AG	AG	AG	AG	AG	AG	AG	AG	AG	AG	AA	AG	AG	AG	AG	AG	AG	AG	AG	AG	AG	AG	AA	AG	AG	AG
931655	C/T	Unknown	76395637	+	CC	CC	CC	CC	CT	CC	CC	CC	CC	CC	CC	CC	CC	CC	CC	CT	CC	CC	CC	CC	CT	CC	CC	CC	CC	CC	CC	CC	CC	CC	CC	CC	CC	CC	CC	CC	CC	CC	CC	CC	CC	CC	CC	CC	CC
931655	A/G	Unknown	76395675	+	AA	AA	AA	AA	AG	AA	AA	AA	AA	AA	AA	AA	AA	AA	AA	AG	AA	AA	AA	AA	AG	AA	AA	AA	AA	AA	AA	AA	AA	AA	AA	AA	AA	AA	AA	AA	AA	AA	AA	AA	AA	AA	AA	AA	AA
932664	A/C	Unknown	76478374	+	AA	AC	AA	AC	AA	AC	AA	AA	AA	AA	AA	AA	AA	AA	AA	AA	AA	AC	AA	AC	AA	AA	AC	AA	AA	AC	AA	AA	AA	AA	AA	AC	AA	AC	AA	AA	AA	AC	AA	AA	AC	AC	AA	AA	AA
932664	G/A	Unknown	76478384	+	GG	GG	GG	GG	GG	GG	GG	GG	GG	GG	GG	GG	GG	GG	GG	GG	GG	GA	GG	GG	GG	GG	GG	GG	GG	GG	GG	GG	GA	GG	GA	GA	GG	GG	GG	GG	GG	GG	GA	GG	GG	GG	GA	GG	GG
932864	C/T	Unknown	76494785	+	CC	CT	CC	CC	CT	CC	CC	CC	CC	CC	CC	CC	CC	CC	CC	CC	CC	CC	CC	CC	CC	CC	CT	CC	CC	CC	CT	CC	CC	CC	CC	CC	CC	CT	CC	CC	CC	CC	CC	CC	CC	CC	CC	CC	CC
932900	G/C	Unknown	76497749	+	GG	GG	GC	GC	GC	GC	GC	GG	GG	GC	GC	GC	GC	GC	GC	GG	GC	GG	GC	GG	GC	GC	GG	GC	GC	GC	GC	GC	GC	GC	GC	GC	GG	GC	GC	GC	GC	GC	GC	GC	GC	GC	GC	GC	GG
933113	C/T	Unknown	76515222	+	CC	CC	CC	CT	CC	CC	CT	CC	CT	CC	CC	CT	CC	CC	CC	CC	CC	CT	CC	CC	CC	CC	CC	CC	CC	CT	CC	CC	CT	CC	CT	CC	CT	CC	CT	CC	CC	CC	CT	CT	CC	CC	CC	CC	CC
933206	C/A	Unknown	76522868	+	CC	CC	CC	CC	CC	CC	CA	CC	CC	CC	CC	CC	CA	CC	CC	CC	CC	CC	CC	CC	CC	CC	CC	CC	CC	CC	CC	CC	CC	CC	CC	CC	CC	CA	CC	CC	CC	CC	CC	CC	CC	CC	CC	CC	CC
933289	G/C	Unknown	76529651	+	GG	GG	GG	GC	GG	GG	GG	GG	GG	GG	GG	GG	GG	GG	GG	GG	GG	GG	GG	GG	GG	GG	GG	GG	GG	GG	GG	GG	GG	GG	GG	GG	GC	GG	GG	GG	GG	GG	GG	GG	GG	GG	GG	GG	GG
933557	T/G	Unknown	76551607	+	TT	TT	TT	TT	TT	TG	TT	TG	TT	TT	TT	TT	TT	TT	TT	TT	TT	TT	TT	TT	TT	TG	TT	TT	TT	TG	TT	TT	TT	TT	TT	TT	TT	TT	TT	TT	TT	TT	TT	TT	TT	TT	TT	TT	TT
933883	A/G	Unknown	76578359	+	AG	AA	AA	AA	AA	AA	AA	AA	AA	AA	AA	AA	AA	AA	AA	AA	AA	AA	AA	AA	AA	AA	AA	AA	AA	AA	AA	AA	AA	AG	AA	AA	AA	AA	AA	AA	AA	AA	AA	AA	AA	AA	AA	AA	AA
934237	G/C	Unknown	76607391	+	GG	GG	GG	GG	GG	GC	GG	GG	GG	GG	GG	GG	GG	GG	GC	GG	GG	GG	GG	GG	GG	GG	GG	GG	GG	GC	GC	GG	GG	GG	GG	GG	GG	GG	GG	GG	GG	GG	GG	GG	GG	GG	GG	GG	GG
934384	T/C	Unknown	76619426	+	TC	TT	TT	TT	TT	TT	TC	TC	TT	TT	TC	TC	TC	TT	TC	TC	TC	TT	TT	TT	TC	TT	TT	TC	TT	TC	TC	TC	TT	TT	TT	TC	TT	TC	TT	TT	TC	TT	TC	TC	TT	TC	TC	TT	TC
934500	A/G	Unknown	76628945	+	AA	AA	AA	AA	AA	AA	AA	AA	AA	AA	AA	AA	AA	AA	AA	AG	AA	AA	AA	AA	AG	AA	AG	AA	AA	AA	AA	AA	AA	AA	AA	AG	AA	AA	AA	AA	AA	AA	AA	AA	AA	AA	AA	AA	AA
934857	T/C	Unknown	76658202	+	TT	TT	TC	TC	TT	TC	TT	TC	TT	TC	TC	TC	TT	TC	TC	TC	TT	TC	TC	TT	TC	TC	TT	TC	TC	TC	TT	TT	TC	TC	TT	TT	TT	TT	TC	TC	TT	TT	TT	TC	TT	TC	TT	TC	TT
934857	G/T	Unknown	76658206	+	GT	GG	GT	GG	GT	GG	GG	GG	GT	GG	GG	GG	GG	GG	GG	GG	GT	GG	GG	GG	GG	GG	GG	GG	GG	GG	GT	GG	GG	GG	GG	GT	GG	GG	GG	GG	GG	GT	GG	GG	GT	GG	GT	GG	GG
934989	G/A	Unknown	76669050	+	GG	GG	GG	GG	GG	GG	GG	GG	GA	GG	GG	GG	GG	GG	GG	GG	GG	GG	GG	GG	GG	GG	GG	GG	GG	GG	GG	GA	GG	GA	GG	GG	GG	GG	GG	GA	GG	GG	GG	GA	GG	GA	GG	GG	GG
935613	G/A	Unknown	76720221	+	GG	GG	GG	GG	GG	GG	GG	GG	GG	GG	GG	GG	GG	GG	GG	GG	GG	GG	GG	GG	GG	GG	GG	GG	GG	GG	GG	GG	GG	GG	GA	GG	GG	GG	GG	GG	GG	GG	GG	GG	GG	GG	GG	GG	GG
936045	C/T	Unknown	76755627	+	CC	CC	CC	CC	CC	CC	CC	CC	CC	CC	CC	CC	CC	CC	CC	CC	CC	CT	CC	CC	CC	CT	CC	CC	CC	CC	CC	CC	CC	CC	CC	CC	CC	CC	CC	CC	CC	CC	CC	CC	CC	CC	CC	CC	CC
938772	A/G	Unknown	76979247	+	AA	AA	AA	AA	AA	AG	AA	AA	AA	AA	AA	AA	AA	AA	AA	AA	AA	AA	AA	AA	AA	AA	AA	AA	AA	AA	AA	AA	AA	AA	AA	AA	AA	AA	AA	AA	AA	AA	AA	AG	AA	AA	AA	AA	AA
939715	G/T	Unknown	77056571	+	GG	GG	GG	GG	GT	GG	GG	GG	GG	GG	GG	GG	GG	GG	GG	GG	GG	GG	GG	GG	GG	GG	GG	GG	GG	GG	GG	GG	GG	GG	GG	GG	GG	GT	GG	GG	GG	GG	GG	GT	GG	GG	GG	GG	GG
940837	C/A	Unknown	77148578	+	CC	CC	CC	CC	CC	CC	CC	CC	CC	CC	CC	CC	CC	CC	CC	CC	CC	CC	CC	CA	CC	CC	CC	CC	CC	CC	CC	CC	CC	CC	CC	CC	CC	CA	CC	CC	CC	CC	CC	CC	CC	CC	CC	CC	CC
940940	G/A	Unknown	77157047	+	GG	GG	GG	GG	GG	GG	GG	GG	GG	GG	GG	GG	GG	GG	GG	GG	GG	GG	GG	GG	GG	GG	GG	GG	GG	GG	GG	GG	GG	GG	GG	GG	GG	GG	GG	GG	GG	GG	GG	GG	GG	GG	GG	GG	GG
941440	C/T	Unknown	77198019	+	CC	CC	CC	CC	CC	CC	CC	CC	CT	CC	CC	CC	CC	CC	CC	CC	CC	CC	CC	CC	CC	CC	CT	CC	CC	CC	CC	CC	CC	CC	CC	CC	CC	CC	CC	CC	CC	CC	CC	CC	CC	CC	CC	CC	CC
942305	G/A	Unknown	77268935	+	GA	GG	GG	GG	GG	GG	GG	GA	GG	GG	GG	GG	GG	GG	GG	GG	GA	GG	GG	GG	GA	GG	GG	GG	GG	GA	GG	GA	GG	GG	GA	GG	GG	GG	GG	GG	GA	GG	GA	GG	GA	GA	GG	GG	GG
942326	C/G	Unknown	77270662	+	CC	CC	CC	CC	CC	CC	CC	CC	CC	CC	CC	CC	CC	CC	CC	CC	CC	CC	CC	CC	CC	CC	CC	CC	CC	CC	CC	CC	CC	CC	CC	CC	CC	CC	CC	CC	CC	CC	CC	CC	CC	CC	CC	CC	CC
942426	G/A	Unknown	77278876	+	GG	GG	GG	GG	GG	GG	GG	GA	GG	GG	GG	GG	GG	GG	GA	GG	GG	GG	GG	GA	GG	GG	GG	GG	GG	GG	GG	GG	GG	GG	GG	GG	GG	GG	GG	GG	GG	GG	GA	GG	GA	GG	GG	GG	GG
942426	G/A	Unknown	77278891	+	GG	GG	GG	GG	GA	GG	GG	GG	GG	GG	GG	GG	GG	GG	GG	GG	GG	GA	GG	GG	GG	GG	GG	GG	GG	GG	GG	GG	GG	GG	GA	GG	GG	GG	GG	GG	GG	GG	GG	GG	GG	GG	GA	GG	GG
943005	G/A	Unknown	77326370	+	GG	GG	GG	GG	GA	GG	GG	GG	GA	GG	GG	GG	GG	GG	GG	GG	GG	GG	GG	GG	GG	GG	GG	GG	GG	GG	GA	GA	GG	GG	GA	GG	GG	GG	GG	GG	GG	GG	GG	GG	GA	GG	GG	GG	GG
943071	C/A	Unknown	77331771	+	CC	CC	CC	CC	CC	CA	CC	CA	CC	CC	CC	CC	CC	CC	CC	CC	CC	CC	CC	CC	CC	CC	CA	CC	CC	CC	CA	CC	CC	CC	CC	CC	CC	CC	CC	CC	CC	CC	CC	CC	CC	CC	CC	CC	CC
943686	T/A	Unknown	77382183	+	TT	TT	TT	TT	TA	TT	TT	TT	TT	TT	TT	TT	TT	TT	TT	TT	TT	TT	TT	TT	TT	TA	TT	TT	TT	TT	TT	TT	TT	TT	TT	TT	TT	TT	TT	TT	TT	TT	TT	TT	TT	TT	TT	TT	TT
944064	G/A	Unknown	77413187	+	GG	GG	GG	GG	GG	GG	GG	GG	GG	GG	GG	GG	GG	GG	GG	GG	GG	GG	GG	GG	GG	GG	GG	GG	GG	GG	GG	GG	GG	GG	GG	GG	GG	GG	GG	GG	GG	GG	GG	GG	GG	GG	GG	GG	GG
944206	G/T	Unknown	77424828	+	GT	GG	GG	GG	GG	GG	GG	GG	GT	GG	GG	GG	GG	GG	GG	GG	GG	GG	GG	GG	GG	GG	GG	GG	GG	GG	GG	GG	GG	GG	GG	GG	GG	GG	GG	GG	GG	GG	GG	GG	GG	GG	GG	GG	GG
944462	C/A	Unknown	77445832	+	CC	CC	CC	CC	CC	CC	CC	CA	CC	CC	CC	CC	CC	CC	CC	CC	CC	CC	CC	CC	CC	CC	CC	CC	CC	CC	CA	CA	CC	CC	CC	CC	CC	CC	CC	CC	CC	CA	CC	CC	CC	CC	CC	CC	CC
944759	C/A	Unknown	77470163	+	CA	CC	CC	CC	CC	CC	CA	CC	CC	CC	CC	CC	CC	CC	CC	CC	CC	CC	CC	CC	CC	CC	CC	CC	CC	CC	CC	CC	CC	CC	CC	CC	CC	CA	CC	CC	CC	CC	CA	CC	CC	CA	CC	CC	CA
945352	C/A	Unknown	77518826	+	AC	AC	AC	CC	AC	AC	AC	AC	AC	AC	AC	AC	AA	AC	AC	AC	AC	AC	AC	AC	AC	AC	AC	AC	AC	AC	AC	AC	AC	AC	AC	AC	AC	AC	AC	AC	AC	AC	AC	AC	AC	AC	AC	AC	AC
945355	G/A	Unknown	77519055	+	GG	GG	GG	GG	GG	GG	GG	GG	GG	GG	GG	GG	GG	GG	GG	GG	GG	GG	GG	GG	GG	GG	GG	GG	GG	GG	GG	GG	GG	GG	GG	GG	GG	GG	GG	GG	GG	GG	GA	GG	GG	GG	GG	GG	GG
945744	C/T	Unknown	77550939	+	CC	CC	CC	CC	CC	CC	CC	CC	CC	CC	CC	CC	CC	CC	CC	CC	CC	CC	CC	CC	CC	CC	CC	CC	CC	CC	CC	CC	CC	CT	CC	CC	CC	CC	CC	CC	CC	CC	CC	CC	CC	CC	CC	CC	CC
946366	G/T	Unknown	77601960	+	GG	GT	GG	GG	GG	GG	GG	GG	GT	GG	GG	GG	GG	GG	GG	GG	GG	GG	GG	GT	GG	GG	GG	GG	GG	GG	GG	GG	GG	GG	GG	GG	GG	GG	GG	GG	GG	GG	GG	GG	GG	GG	GG	GG	GG
946366	C/T	Unknown	77601961	+	CC	CT	CC	CC	CC	CC	CC	CC	CT	CC	CC	CC	CC	CC	CC	CC	CC	CC	CC	CT	CC	CC	CC	CC	CC	CC	CC	CC	CC	CC	CC	CC	CC	CC	CC	CC	CC	CC	CC	CC	CC	CC	CC	CC	CC
947270	C/T	Unknown	77676100	+	CC	CC	CC	CC	CC	CT	CC	CC	CC	CC	CC	CC	CC	CC	CC	CC	CC	CC	CC	CC	CC	CC	CT	CT	CC	CC	CC	CC	CC	CC	CT	CC	CC	CC	CT	CC	CC	CT	CC	CC	CC	CC	CC	CC	CC
947791	C/T	Unknown	77718815	+	CC	CT	CC	CC	CC	CC	CC	CC	CC	CC	CC	CC	CC	CC	CC	CT	CC	CC	CC	CC	CC	CC	CC	CC	CC	CC	CT	CT	CC	CC	CC	CT	CC	CC	CC	CC	CC	CC	CC	CC	CT	CT	CC	CC	CC
948129	A/G	Unknown	77746513	+	AA	AA	AA	AA	AA	AA	AA	AA	AA	AA	AA	AA	AA	AA	AA	AA	AA	AA	AA	AA	AA	AA	AA	AA	AA	AA	AA	AA	AA	AA	AA	AA	AA	AA	AA	AA	AA	AA	AA	AG	AA	AA	AA	AA	AA
948957	G/C	Unknown	77814415	+	GG	GG	GG	GG	GG	GG	GG	GG	GG	GG	GG	GG	GG	GG	GG	GG	GG	GG	GG	GG	GG	GG	GG	GC	GG	GG	GG	GG	GG	GG	GG	GG	GG	GG	GG	GG	GG	GG	GG	GG	GG	GG	GG	GG	GG
949041	C/T	Unknown	77821316	+	CC	CC	CC	CC	CC	CC	CC	CC	CC	CC	CC	CC	CC	CC	CC	CC	CC	CT	CC	CC	CC	CC	CT	CT	CT	CC	CT	CC	CC	CC	CC	CC	CC	CC	CC	CC	CC	CC	CC	CC	CC	CC	CC	CC	CC
949099	C/T	Unknown	77826054	+	CC	CC	CC	CT	CC	CC	CC	CC	CC	CC	CC	CC	CC	CC	CC	CC	CC	CC	CC	CC	CC	CC	CC	CC	CC	CC	CC	CC	CC	CC	CC	CC	CC	CC	CC	CT	CC	CC	CC	CC	CC	CC	CC	CC	CC
949506	C/T	Unknown	77859422	+	CC	CC	CC	CC	CC	CC	CC	CC	CC	CC	CC	CC	CC	CC	CT	CC	CC	CC	CC	CC	CC	CC	CC	CC	CC	CC	CC	CC	CC	CC	CC	CT	CC	CC	CC	CC	CC	CC	CC	CC	CC	CC	CC	CC	CC
949908	G/C	Unknown	77892415	+	GC	GC	GC	GC	GC	GC	GC	GC	GC	GC	GC	GC	GC	GC	GC	GC	GC	GC	GC	GC	GC	GC	GC	GC	GC	GC	GC	GG	GC	GC	GC	GC	GC	GC	GC	GC	GC	GC	GC	GC	GC	GC	GC	GC	GC
949947	A/G	Unknown	77895579	+	AA	AA	AA	AA	AA	AA	AA	AA	AA	AA	AA	AA	AA	AA	AA	AA	AA	AA	AA	AA	AG	AA	AA	AA	AA	AA	AA	AA	AA	AA	AA	AA	AA	AA	AA	AA	AA	AA	AG	AA	AA	AA	AA	AA	AA
949947	A/G	Unknown	77895615	+	AA	AA	AA	AA	AA	AA	AA	AA	AA	AA	AA	AA	AA	AA	AA	AG	AA	AA	AA	AA	AG	AA	AA	AA	AA	AA	AA	AA	AA	AA	AA	AG	AA	AA	AA	AA	AA	AA	AA	AA	AA	AA	AG	AA	AA
951131	C/T	Unknown	77992672	+	CC	CC	CC	CC	CC	CC	CT	CC	CC	CC	CC	CC	CC	CC	CT	CC	CC	CC	CC	CC	CC	CT	CT	CC	CC	CC	CC	CC	CC	CC	CC	CC	CC	CC	CC	CC	CC	CC	CC	CC	CC	CC	CC	CC	CC
951131	G/A	Unknown	77992676	+	GG	GG	GG	GG	GG	GG	GG	GG	GG	GG	GG	GG	GG	GG	GG	GG	GG	GG	GG	GG	GG	GG	GG	GA	GA	GG	GG	GG	GG	GG	GG	GG	GG	GG	GA	GG	GG	GG	GG	GG	GG	GG	GG	GG	GG
952749	C/T	Unknown	78125401	+	CC	CC	CC	CC	CC	CC	CC	CC	CT	CC	CC	CC	CC	CC	CC	CC	CC	CC	CC	CC	CC	CC	CC	CC	CT	CC	CC	CC	CC	CC	CC	CC	CC	CC	CC	CC	CC	CC	CC	CC	CC	CC	CC	CC	CC
954802	C/T	Unknown	78293719	+	CC	CC	CC	CC	CC	CC	CC	CC	CC	CC	CT	CC	CC	CT	CT	CC	CT	CT	CC	CC	CT	CT	CC	CC	CC	CC	CT	CT	CC	CC	CC	CC	CC	CC	CC	CC	CC	CC	CC	CT	CC	CT	CC	CC	CC
954945	G/A	Unknown	78305442	+	GG	GG	GG	GG	GG	GG	GA	GG	GG	GG	GG	GG	GG	GG	GA	GG	GG	GG	GG	GG	GG	GG	GG	GA	GG	GG	GG	GG	GG	GG	GG	GG	GG	GG	GG	GG	GA	GG	GG	GG	GG	GG	GG	GG	GG
956161	G/A	Unknown	78405173	+	GA	GG	GG	GG	GG	GG	GA	GA	GG	GG	GG	GG	GG	GG	GG	GG	GG	GG	GG	GG	GA	GG	GG	GG	GG	GG	GG	GG	GG	GG	GA	GG	GG	GG	GG	GG	GG	GG	GA	GG	GG	GG	GA	GG	GG
956567	G/A	Unknown	78438446	+	GG	GG	GG	GG	GA	GG	GG	GG	GG	GG	GG	GG	GG	GG	GG	GG	GG	GG	GG	GG	GG	GG	GA	GG	GA	GG	GG	GG	GG	GA	GG	GG	GG	GG	GG	GG	GG	GG	GG	GG	GG	GG	GG	GG	GG
956959	G/A	Unknown	78470583	+	GG	GG	GG	GG	GG	GG	GG	GG	GG	GG	GG	GG	GG	GG	GG	GG	GG	GG	GG	GG	GG	GG	GG	GG	GG	GA	GG	GG	GG	GA	GG	GG	GG	GA	GG	GG	GG	GG	GA	GG	GG	GG	GG	GG	GG
957140	G/T	Unknown	78485432	+	GT	GT	GT	GT	GT	GT	GG	GT	GT	GT	GT	GT	GT	GT	GT	GT	GT	GT	GT	GT	GT	GT	GT	GT	GT	GT	GT	GT	GT	GG	GT	GT	GT	GT	GT	GT	GT	GT	GT	GT	GT	GT	GT	GT	GT
957301	G/C	Unknown	78498607	+	GG	GC	GG	GC	GG	GG	GG	GG	GG	GG	GG	GG	GG	GG	GC	GG	GG	GG	GG	GG	GG	GG	GC	GG	GG	GC	GG	GC	GG	GG	GG	GG	GG	GG	GG	GG	GG	GG	GG	GG	GG	GG	GG	GG	GG
957307	G/A	Unknown	78499104	+	GA	GA	GA	GA	GA	GA	GA	GA	GA	GA	GA	GA	GA	GA	GA	GG	GA	GA	GA	GA	GA	GA	GA	GA	GA	GA	GA	GA	GA	GG	GA	GA	GA	GG	GA	GA	GA	GA	GA	GA	GA	GA	GA	GA	GA
957716	G/A	Unknown	78532664	+	GA	GA	GA	GA	GA	GA	GA	GG	GA	GA	GA	GA	GA	GA	GA	GA	GA	GA	GA	GA	GA	GA	GA	GA	GA	GA	GA	GA	GA	GG	GA	GG	GA	GA	GA	GA	GA	GG	GA	GA	GA	GA	GA	GA	GA
958246	G/C	Unknown	78576121	+	GG	GG	GG	GG	GG	GC	GG	GG	GG	GG	GG	GG	GC	GG	GG	GG	GC	GC	GG	GC	GG	GG	GG	GC	GG	GG	GG	GC	GG	GC	GG	GC	GG	GG	GG	GG	GG	GC	GG	GG	GG	GC	GG	GG	GG
958246	C/T	Unknown	78576146	+	CC	CC	CC	CC	CC	CC	CC	CC	CC	CC	CT	CC	CC	CC	CC	CC	CC	CC	CC	CC	CC	CC	CC	CC	CC	CC	CC	CC	CC	CC	CC	CC	CC	CC	CC	CC	CC	CC	CC	CC	CC	CC	CC	CC	CC
958692	C/T	Unknown	78612671	+	CC	CC	CC	CC	CC	CC	CC	CC	CC	CC	CC	CC	CC	CC	CC	CC	CC	CC	CC	CC	CC	CC	CT	CC	CC	CC	CC	CC	CC	CC	CC	CC	CC	CT	CC	CC	CC	CC	CC	CC	CC	CC	CC	CC	CT
959644	G/T	Unknown	78690760	+	GT	GT	GG	GG	GG	GG	GG	GG	GG	GG	GT	GG	GG	GT	GG	GT	GT	GG	GT	GG	GG	GG	GG	GT	GG	GT	GT	GT	GG	GG	GG	GT	GG	GG	GG	GG	GG	GG	GG	GG	GG	GG	GG	GG	GT
959667	G/T	Unknown	78692626	+	GG	GG	GG	GG	GG	GG	GT	GG	GT	GG	GG	GG	GT	GG	GG	GG	GG	GG	GG	GG	GG	GG	GG	GG	GG	GG	GG	GG	GG	GT	GG	GG	GG	GT	GG	GG	GT	GT	GT	GG	GG	GT	GG	GG	GG
959667	G/A	Unknown	78692632	+	GG	GG	GG	GG	GG	GG	GA	GG	GA	GG	GG	GG	GA	GG	GG	GG	GG	GG	GG	GG	GG	GG	GG	GG	GG	GG	GG	GG	GG	GA	GG	GG	GG	GA	GG	GG	GA	GA	GA	GG	GG	GA	GG	GG	GG
959799	G/C	Unknown	78703447	+	GG	GG	GC	GG	GG	GG	GG	GC	GG	GG	GG	GG	GC	GG	GC	GG	GG	GG	GG	GG	GG	GG	GG	GG	GC	GG	GG	GG	GG	GG	GG	GG	GG	GG	GG	GG	GC	GG	GG	GG	GG	GG	GG	GG	GG
960436	A/G	Unknown	78755736	+	AA	AG	AA	AG	AA	AA	AG	AG	AG	AA	AG	AA	AA	AA	AA	AA	AG	AA	AA	AA	AA	AG	AG	AA	AA	AG	AG	AG	AA	AG	AA	AA	AA	AG	AA	AA	AG	AG	AG	AG	AG	AA	AA	AA	AG
960631	T/C	Unknown	78771670	+	TT	TT	TT	TT	TT	TT	TT	TT	TT	TT	TC	TT	TT	TT	TT	TT	TT	TT	TT	TT	TT	TT	TC	TT	TC	TT	TT	TT	TT	TT	TT	TC	TT	TT	TT	TT	TT	TT	TT	TT	TT	TT	TT	TT	TT
960662	G/A	Unknown	78774249	+	GG	GG	GG	GA	GG	GG	GG	GG	GG	GG	GG	GG	GG	GG	GG	GG	GG	GG	GG	GG	GG	GG	GG	GG	GG	GG	GG	GA	GG	GG	GG	GG	GG	GG	GG	GG	GG	GG	GG	GG	GG	GG	GG	GG	GG
960689	G/C	Unknown	78776445	+	GG	GG	GG	GG	GC	GG	GG	GG	GG	GG	GG	GG	GG	GG	GG	GG	GC	GC	GG	GG	GG	GG	GG	GG	GG	GG	GG	GG	GG	GG	GG	GG	GG	GG	GG	GG	GG	GG	GG	GC	GG	GG	GG	GG	GG
961028	T/C	Unknown	78804228	+	TT	TT	TT	TT	TC	TT	TT	TT	TT	TT	TT	TC	TT	TT	TT	TT	TC	TT	TT	TT	TT	TT	TT	TT	TT	TT	TT	TT	TT	TT	TT	TT	TT	TT	TT	TT	TT	TT	TC	TT	TT	TT	TT	TT	TT
962900	G/A	Unknown	78957727	+	GG	GG	GG	GG	GA	GG	GG	GA	GA	GG	GG	GG	GG	GG	GG	GG	GG	GG	GG	GG	GG	GG	GG	GG	GG	GG	GG	GG	GG	GG	GA	GG	GG	GG	GG	GG	GG	GG	GG	GA	GG	GG	GG	GG	GG
963324	C/A	Unknown	78992516	+	CA	CA	CA	CC	CA	CC	CA	CC	CC	CA	CC	CA	CA	CA	CC	CA	CA	CC	CA	CA	CA	CA	CA	CA	CC	CC	CC	CC	CA	CC	CA	CC	CC	CC	CA	CA	CC	CC	CC	CA	CC	CC	CC	CA	CC
964219	G/A	Unknown	79065908	+	GA	GG	GG	GG	GG	GG	GG	GG	GG	GG	GG	GG	GG	GG	GG	GG	GG	GG	GG	GG	GG	GG	GG	GG	GG	GG	GG	GG	GG	GA	GG	GG	GG	GG	GG	GG	GA	GA	GG	GG	GG	GG	GG	GG	GG
965847	G/A	Unknown	79199392	+	GA	AA	GA	GA	GA	GA	GA	GA	GA	GA	GA	GA	GA	GA	GA	GA	GA	GA	GA	GA	GA	GA	GA	GA	GA	GA	GA	GA	GA	GA	GA	GA	GA	GA	GA	GA	GA	GA	GA	GA	GA	GA	GA	GA	GA
966210	T/C	Unknown	79229169	+	TC	TC	TC	TC	TT	TT	TT	TT	TT	TC	TC	TC	TT	TT	TT	TC	TT	TC	TC	TC	TC	TC	TC	TT	TT	TT	TC	TT	TC	TC	TT	TC	TC	TT	TC	TC	TC	TT	TC	TT	TT	TT	TT	TC	TC
966250	C/T	Unknown	79232447	+	CC	CC	CC	CC	CC	CC	CC	CT	CC	CC	CC	CC	CC	CC	CC	CC	CC	CC	CC	CC	CC	CC	CT	CC	CC	CC	CC	CC	CT	CC	CC	CC	CC	CC	CC	CC	CC	CC	CC	CC	CC	CC	CC	CC	CC
966399	C/T	Unknown	79244654	+	CC	CT	CC	CC	CC	CT	CC	CC	CC	CC	CT	CC	CT	CT	CC	CC	CC	CC	CC	CC	CC	CC	CC	CC	CC	CT	CT	CT	CC	CC	CC	CC	CC	CC	CC	CC	CC	CC	CC	CT	CC	CC	CC	CC	CC
966430	C/T	Unknown	79247204	+	CC	CT	CT	CT	CC	CT	CC	CC	CC	CT	CC	CT	CT	CT	CT	CC	CC	CT	CC	CT	CC	CT	CC	CC	CT	CC	CT	CT	CT	CT	CT	CT	CT	CC	CT	CT	CT	CC	CC	CT	CC	CC	CC	CT	CT
966581	G/A	Unknown	79259596	+	GG	GG	GG	GG	GG	GG	GG	GG	GG	GG	GG	GA	GG	GG	GG	GG	GG	GG	GG	GG	GG	GG	GG	GA	GG	GG	GG	GG	GG	GG	GG	GG	GG	GG	GA	GG	GG	GG	GG	GA	GG	GG	GG	GG	GG
966581	C/T	Unknown	79259597	+	CC	CC	CC	CC	CC	CC	CC	CC	CC	CC	CC	CC	CC	CC	CC	CC	CC	CC	CC	CC	CC	CC	CC	CT	CC	CC	CC	CC	CC	CC	CC	CC	CC	CC	CT	CC	CC	CC	CC	CT	CC	CC	CC	CC	CC
967762	A/C	Unknown	79356440	+	AC	AC	AC	AC	AC	AC	AC	AC	AC	AC	AC	AC	AC	AC	AC	AC	AC	AC	AC	AC	AC	AA	AC	AC	AC	AC	AC	AC	AC	AC	AC	AC	AC	AC	AC	AC	AC	AC	AC	AC	AC	AC	AC	AC	AC
971692	G/A	Unknown	79678715	+	GG	GG	GG	GG	GG	GG	GG	GG	GG	GG	GG	GG	GG	GG	GG	GG	GG	GG	GG	GG	GG	GG	GA	GA	GG	GG	GG	GG	GG	GG	GG	GG	GG	GG	GG	GG	GG	GG	GG	GG	GG	GG	GG	GG	GG
978867	A/T	Unknown	80267075	+	AA	AA	AA	AA	AA	AT	AA	AT	AA	AA	AA	AA	AA	AA	AA	AA	AA	AA	AA	AA	AA	AA	AT	AA	AT	AA	AA	AA	AT	AA	AA	AA	AA	AA	AA	AA	AA	AA	AA	AA	AA	AA	AT	AA	AA
980178	G/A	Unknown	80374551	+	GA	GG	GG	GG	GA	GG	GA	GG	GG	GA	GA	GG	GG	GG	GG	GG	GA	GA	GA	GG	GG	GA	GG	GA	GA	GG	GA	GG	GA	GG	GA	GG	GA	GA	GG	GG	GA	GG	GG	GG	GG	GG	GA	GG	GG
981006	C/T	Unknown	80442456	+	CT	CC	CC	CT	CC	CC	CT	CC	CC	CC	CC	CC	CC	CC	CC	CC	CC	CC	CC	CC	CC	CC	CC	CC	CC	CC	CC	CC	CC	CC	CC	CT	CC	CC	CC	CC	CC	CC	CC	CT	CC	CC	CC	CC	CC
981280	A/G	Unknown	80464897	+	AA	AA	AA	AA	AA	AA	AA	AA	AA	AA	AA	AA	AA	AA	AA	AA	AA	AA	AA	AA	AA	AA	AA	AA	AA	AA	AA	AA	AA	AA	AA	AA	AA	AA	AA	AA	AA	AA	AA	AA	AA	AA	AA	AA	AA
988872	T/A	Unknown	81087454	+	TA	TA	TA	TT	TA	TA	TA	TA	TA	TA	TA	TA	TA	TA	TA	TA	TA	TA	TA	TA	TA	TA	TA	TA	TA	TA	TA	TA	TA	TA	TA	TA	TA	TA	TA	TA	TA	TA	TA	TA	TA	TA	TA	TA	TA
988872	C/A	Unknown	81087474	+	CA	CC	CC	CC	CC	CC	CC	CC	CC	CC	CC	CA	CC	CC	CA	CC	CC	CC	CC	CC	CC	CC	CC	CC	CC	CC	CC	CC	CC	CC	CC	CC	CC	CC	CC	CC	CC	CC	CC	CC	CA	CC	CA	CC	CC
997324	C/T	Unknown	81780494	+	CC	CC	CC	CC	CC	CT	CC	CC	CC	CC	CT	CC	CT	CC	CC	CC	CC	CC	CC	CC	CC	CC	CT	CC	CC	CC	CC	CC	CC	CC	CC	CC	CC	CC	CC	CC	CC	CC	CT	CC	CT	CC	CC	CC	CC
998384	G/A	Unknown	81867427	+	GG	GG	GG	GA	GG	GG	GG	GA	GG	GG	GG	GG	GG	GG	GA	GG	GG	GA	GG	GG	GG	GG	GG	GG	GG	GG	GG	GG	GG	GG	GG	GG	GG	GA	GG	GG	GG	GG	GG	GG	GG	GG	GA	GG	GG
999087	G/A	Unknown	81925080	+	GG	GG	GG	GG	GG	GG	GG	GG	GG	GG	GG	GG	GG	GG	GG	GG	GG	GG	GG	GG	GG	GG	GG	GG	GG	GG	GG	GG	GG	GG	GG	GG	GG	GG	GG	GG	GG	GG	GG	GG	GG	GG	GG	GG	GG
1018197	G/A	Unknown	83492133	+	GG	GG	GG	GG	GG	GG	GG	GG	GG	GG	GG	GG	GG	GG	GG	GG	GG	GG	GG	GG	GG	GG	GA	GG	GG	GG	GG	GG	GG	GG	GG	GG	GG	GG	GG	GG	GG	GG	GG	GG	GG	GG	GG	GG	GG
1020620	G/A	Unknown	83690767	+	GG	GG	GG	GG	GG	GA	GG	GG	GA	GG	GG	GG	GG	GA	GG	GG	GG	GG	GG	GG	GG	GG	GA	GA	GG	GG	GG	GG	GG	GG	GA	GG	GG	GG	GG	GG	GG	GG	GG	GG	GG	GA	GG	GG	GG
1020620	G/A	Unknown	83690789	+	GA	GG	GG	GG	GG	GG	GG	GG	GG	GG	GG	GG	GG	GG	GG	GG	GG	GG	GG	GG	GG	GA	GG	GA	GG	GG	GA	GG	GG	GG	GA	GG	GG	GG	GG	GG	GG	GA	GA	GA	GG	GG	GA	GG	GG
1022307	C/T	Unknown	83829104	+	CC	CC	CC	CC	CT	CC	CC	CC	CC	CC	CC	CC	CC	CC	CT	CC	CC	CC	CC	CC	CC	CC	CC	CC	CC	CC	CC	CC	CC	CT	CT	CT	CC	CT	CC	CC	CC	CC	CC	CC	CC	CC	CC	CC	CC
1024826	C/T	Unknown	84035663	+	CC	CC	CC	CC	CC	CC	CC	CC	CC	CC	CC	CC	CC	CC	CC	CC	CC	CC	CC	CC	CC	CC	CC	CC	CC	CC	CC	CC	CC	CC	CT	CC	CC	CC	CC	CC	CC	CC	CT	CC	CC	CC	CC	CC	CC
1024826	C/G	Unknown	84035681	+	CG	CC	CC	CC	CC	CC	CC	CC	CC	CC	CC	CC	CC	CC	CC	CC	CC	CC	CC	CC	CC	CC	CC	CC	CC	CC	CC	CC	CC	CC	CC	CC	CC	CC	CC	CC	CC	CC	CC	CC	CC	CC	CC	CC	CC
1025973	C/T	Unknown	84129728	+	CC	CC	CC	CC	CC	CC	CC	CC	CC	CC	CC	CC	CC	CC	CC	CC	CC	CC	CC	CC	CC	CC	CC	CC	CC	CC	CC	CC	CC	CC	CC	CC	CC	CC	CC	CC	CC	CC	CC	CC	CC	CT	CC	CC	CC
1036459	C/T	Unknown	84989575	+	CC	CC	CC	CC	CC	CC	CC	CT	CC	CC	CC	CC	CC	CC	CC	CC	CC	CC	CC	CC	CC	CC	CC	CC	CC	CT	CC	CC	CC	CC	CC	CT	CC	CC	CC	CC	CC	CC	CC	CC	CC	CT	CC	CC	CC
1037796	C/T	Unknown	85099229	+	CT	CT	CT	CT	CT	CT	CT	CT	CT	CT	CT	CC	CT	CT	CT	CT	CT	CT	CT	CT	CT	CT	CT	CT	CT	CT	CT	CT	CT	CT	CT	CT	CT	CT	CT	CT	CT	CT	CT	CT	CT	CT	CT	CT	CT
1038141	C/A	Unknown	85127489	+	CA	CC	CA	CA	CA	CA	CA	CA	CC	CA	CA	CC	CC	CC	CC	CA	CA	CA	CA	CA	CA	CA	CA	CC	CC	CA	CA	CC	CA	CA	CA	CC	CA	CA	CA	CA	CA	CA	CA	CA	CA	CA	CC	CA	CA
1038705	C/T	Unknown	85173760	+	CC	CC	CC	CC	CC	CC	CC	CC	CC	CC	CC	CC	CC	CC	CC	CC	CC	CC	CC	CC	CC	CC	CC	CC	CC	CC	CC	CC	CC	CC	CT	CC	CC	CC	CC	CC	CC	CC	CC	CC	CT	CC	CC	CC	CC
1038732	G/A	Unknown	85175948	+	GG	GG	GG	GG	GG	GG	GG	GG	GG	GG	GG	GG	GG	GG	GG	GG	GG	GG	GG	GG	GG	GG	GG	GG	GG	GG	GG	GG	GG	GG	GG	GG	GG	GG	GG	GG	GG	GG	GG	GG	GG	GG	GG	GG	GG
1038732	C/T	Unknown	85175971	+	CC	CC	CC	CC	CC	CC	CC	CC	CC	CC	CC	CC	CC	CC	CC	CC	CC	CC	CC	CC	CC	CC	CC	CC	CC	CC	CC	CC	CC	CC	CC	CC	CC	CC	CC	CC	CC	CC	CC	CC	CC	CC	CC	CC	CC
1038992	A/C	Unknown	85197275	+	AA	AA	AA	AA	AA	AC	AA	AA	AA	AA	AA	AA	AA	AA	AA	AA	AA	AA	AA	AA	AA	AA	AA	AA	AA	AA	AA	AA	AA	AA	AA	AA	AA	AC	AC	AA	AA	AA	AA	AC	AC	AA	AA	AA	AC
1039122	C/A	Unknown	85207958	+	CC	CC	CC	CC	CC	CC	CC	CC	CC	CC	CC	CC	CC	CC	CC	CC	CC	CC	CC	CC	CC	CC	CC	CC	CC	CA	CC	CC	CC	CC	CC	CC	CC	CC	CC	CC	CC	CC	CC	CC	CC	CC	CC	CC	CC
1039471	G/C	Unknown	85236581	+	GC	GC	GC	GC	GC	GC	GC	GC	GC	GC	GC	GC	GC	GC	GC	GC	GC	GC	GC	GC	CC	GC	GC	GC	GC	GC	GC	GC	GC	GC	GC	GC	GC	GC	GC	GC	GC	GC	GC	GC	GC	GC	GC	GC	GC
1039609	T/C	Unknown	85247870	+	TC	TC	TC	TC	TC	TC	TC	TC	TC	TT	TC	TC	TC	TC	TT	TC	TC	TC	TC	TC	TC	TC	TC	TC	TC	TC	TC	TC	TC	TC	TC	TC	TC	TT	TC	TC	TC	TC	TT	TC	TC	TT	TC	TC	TC
1039656	G/T	Unknown	85251725	+	GG	GG	GG	GG	GG	GG	GG	GG	GG	GG	GG	GG	GG	GG	GG	GT	GG	GG	GG	GG	GT	GG	GT	GG	GT	GT	GG	GG	GG	GG	GG	GG	GG	GG	GG	GG	GG	GG	GG	GT	GG	GT	GG	GG	GT
1039713	G/T	Unknown	85256401	+	GG	GG	GG	GG	GG	GG	GG	GG	GG	GG	GT	GG	GT	GG	GG	GG	GG	GT	GG	GG	GG	GG	GG	GT	GG	GT	GG	GG	GG	GG	GG	GG	GG	GG	GG	GG	GG	GG	GT	GG	GG	GG	GT	GG	GG
1040150	T/G	Unknown	85292249	+	TG	TG	TG	TG	TG	TG	TT	TT	TG	TG	TG	TG	TG	TG	TG	TG	TG	TG	TG	TG	TG	TG	TG	TG	TG	TG	TG	TG	TG	TG	TG	TG	TG	TG	TG	TG	TG	TG	TG	TG	TG	TG	TG	TG	TG
1040948	G/T	Unknown	85357670	+	GT	GT	GT	GT	GT	GT	GT	GT	GG	GT	GT	GT	GT	GT	GT	GT	GT	GT	GG	GT	GT	GT	GT	GT	GT	GT	GT	GT	GT	GT	GG	GT	GT	GT	GT	GT	GT	GT	GT	GT	GT	GT	GT	GT	GT
1041056	C/T	Unknown	85366536	+	CC	CC	CC	CC	CC	CT	CC	CC	CC	CT	CT	CC	CT	CT	CC	CT	CT	CC	CC	CT	CC	CT	CT	CT	CT	CT	CT	CT	CC	CT	CC	CC	CC	CC	CT	CT	CC	CC	CC	CT	CC	CT	CT	CT	CT
1041170	G/A	Unknown	85375873	+	GG	GG	GG	GG	GG	GG	GG	GG	GA	GG	GG	GG	GG	GG	GG	GG	GG	GG	GG	GG	GG	GG	GG	GG	GG	GG	GG	GG	GG	GG	GA	GA	GG	GG	GA	GG	GA	GG	GG	GG	GG	GG	GG	GG	GG
1041413	G/A	Unknown	85395798	+	GG	GG	GG	GG	GG	GG	GG	GG	GG	GG	GG	GG	GG	GG	GG	GG	GG	GG	GG	GG	GG	GG	GG	GG	GG	GG	GG	GG	GG	GG	GG	GG	GG	GG	GG	GG	GG	GG	GG	GG	GG	GG	GG	GG	GG
1042109	A/G	Unknown	85452873	+	AA	AA	AA	AA	AG	AA	AA	AA	AG	AA	AA	AA	AA	AA	AA	AA	AA	AA	AA	AA	AA	AA	AA	AA	AA	AA	AA	AA	AA	AA	AA	AA	AA	AA	AA	AA	AA	AG	AA	AA	AA	AA	AA	AA	AA
1042188	C/T	Unknown	85459347	+	CC	CT	CC	CC	CC	CC	CT	CC	CC	CT	CC	CT	CC	CC	CC	CC	CC	CC	CC	CT	CC	CC	CC	CT	CC	CC	CC	CC	CC	CT	CC	CC	CC	CC	CC	CC	CC	CC	CC	CC	CC	CC	CC	CC	CC
1044165	C/T	Unknown	85621467	+	CC	CC	CC	CC	CC	CC	CC	CC	CC	CC	CC	CC	CC	CC	CT	CC	CC	CC	CC	CC	CC	CC	CC	CC	CC	CC	CC	CC	CC	CC	CC	CC	CC	CT	CC	CC	CC	CT	CC	CC	CC	CC	CC	CC	CC
1044740	T/A	Unknown	85668630	+	TT	TT	TT	TT	TT	TT	TT	TT	TT	TT	TT	TT	TT	TT	TT	TT	TT	TT	TT	TT	TT	TT	TT	TT	TT	TT	TT	TT	TT	TT	TT	TT	TT	TT	TT	TT	TT	TT	TT	TT	TT	TT	TT	TT	TT
1044897	A/G	Unknown	85681498	+	AA	AA	AA	AA	AA	AA	AA	AA	AA	AA	AA	AA	AA	AA	AA	AA	AA	AA	AA	AA	AG	AA	AA	AA	AA	AA	AA	AA	AA	AA	AA	AA	AA	AA	AA	AA	AA	AA	AA	AG	AA	AA	AA	AA	AA
1045056	C/A	Unknown	85694551	+	CC	CC	CC	CC	CC	CC	CA	CC	CC	CC	CC	CC	CC	CC	CC	CC	CC	CC	CC	CC	CC	CC	CC	CC	CC	CC	CC	CC	CC	CC	CC	CC	CC	CC	CC	CC	CC	CC	CC	CC	CC	CC	CC	CC	CC
1045528	A/C	Unknown	85733220	+	AA	AA	AA	AA	AA	AC	AA	AA	AA	AA	AA	AA	AA	AA	AA	AA	AA	AA	AA	AA	AA	AA	AA	AA	AA	AA	AA	AA	AA	AA	AA	AA	AA	AA	AA	AA	AA	AC	AA	AA	AA	AA	AA	AA	AA
1046355	C/T	Unknown	85801039	+	CC	CC	CC	CC	CC	CC	CC	CT	CT	CC	CC	CC	CC	CC	CC	CC	CC	CC	CC	CC	CC	CC	CC	CC	CC	CC	CC	CC	CC	CC	CC	CC	CC	CC	CC	CC	CC	CC	CC	CT	CC	CC	CC	CC	CC
1046652	A/G	Unknown	85825393	+	AA	AA	AA	AA	AG	AA	AG	AA	AG	AA	AG	AA	AA	AG	AA	AA	AA	AA	AA	AA	AG	AA	AG	AG	AG	AA	AA	AA	AG	AA	AA	AA	AA	AA	AG	AA	AA	AA	AG	AA	AG	AA	AA	AA	AA
1046652	C/T	Unknown	85825406	+	CC	CT	CC	CC	CC	CC	CT	CC	CC	CC	CC	CT	CC	CC	CT	CT	CC	CC	CC	CC	CC	CC	CC	CC	CT	CC	CC	CT	CC	CC	CT	CC	CC	CT	CC	CC	CT	CC	CC	CC	CC	CC	CC	CC	CC
1046652	C/T	Unknown	85825434	+	CC	CC	CC	CC	CC	CC	CC	CC	CC	CC	CC	CC	CC	CC	CC	CC	CT	CC	CC	CC	CC	CC	CC	CC	CC	CC	CC	CC	CC	CC	CC	CC	CC	CC	CC	CC	CC	CT	CC	CT	CC	CT	CC	CC	CC
1046817	G/A	Unknown	85838941	+	GG	GA	GG	GG	GG	GG	GG	GG	GG	GG	GG	GG	GG	GG	GG	GG	GG	GG	GG	GG	GG	GG	GG	GG	GG	GG	GG	GG	GG	GA	GG	GG	GG	GG	GG	GG	GG	GG	GG	GG	GG	GG	GG	GG	GG
1046817	C/T	Unknown	85838965	+	CC	CC	CC	CC	CC	CC	CC	CC	CC	CC	CC	CC	CC	CC	CC	CC	CC	CC	CC	CC	CC	CC	CT	CC	CC	CC	CC	CC	CC	CC	CC	CC	CC	CC	CC	CC	CC	CC	CC	CC	CC	CC	CC	CC	CC
1047076	G/C	Unknown	85860183	+	GC	GG	GG	GG	GG	GC	GG	GG	GG	GG	GG	GC	GG	GG	GG	GG	GG	GG	GG	GG	GG	GC	GG	GG	GG	GG	GG	GG	GG	GG	GG	GG	GG	GG	GG	GG	GG	GG	GG	GG	GG	GG	GG	GG	GG
1047470	C/G	Unknown	85892472	+	CG	CG	CG	CG	CG	CG	CG	CG	CG	CG	CG	CG	CG	CG	CG	CG	CG	CG	CG	CG	CG	CG	CG	CG	CG	CG	CG	CG	CG	CC	CG	CG	CG	CG	CG	CG	CG	CG	CG	CG	CG	CG	CG	CG	CG
1048159	C/T	Unknown	85948991	+	CC	CC	CC	CT	CT	CC	CC	CC	CT	CC	CC	CC	CC	CC	CC	CC	CC	CC	CC	CC	CC	CC	CC	CC	CC	CC	CC	CT	CC	CC	CC	CC	CC	CC	CT	CC	CC	CC	CC	CT	CC	CC	CC	CC	CC
1048166	C/G	Unknown	85949613	+	CC	CC	CC	CC	CC	CC	CC	CG	CG	CC	CC	CC	CC	CC	CC	CC	CC	CC	CC	CC	CC	CC	CC	CC	CC	CC	CC	CC	CC	CC	CC	CC	CC	CC	CC	CC	CC	CC	CC	CC	CC	CC	CC	CC	CC
1050073	G/A	Unknown	86105956	+	GG	GA	GA	GA	GA	GG	GA	GG	GG	GA	GA	GA	GG	GA	GG	GA	GA	GA	GA	GA	GA	GG	GA	GA	GG	GG	GA	GA	GA	GA	GA	GA	GA	GG	GA	GA	GA	GA	GA	GA	GG	GG	GA	GA	GA
1050086	T/C	Unknown	86106980	+	TT	TT	TT	TT	TT	TT	TC	TC	TT	TT	TT	TT	TT	TT	TT	TT	TT	TT	TT	TT	TT	TT	TT	TT	TT	TT	TT	TT	TT	TT	TT	TT	TT	TT	TT	TT	TT	TT	TT	TT	TT	TT	TT	TT	TT
1050086	G/A	Unknown	86106982	+	GG	GG	GG	GG	GG	GG	GA	GA	GG	GG	GG	GG	GG	GG	GG	GG	GG	GG	GG	GG	GG	GG	GG	GG	GG	GG	GG	GG	GG	GG	GG	GG	GG	GG	GG	GG	GG	GG	GG	GG	GG	GG	GG	GG	GG
1050753	C/T	Unknown	86161672	+	CT	CC	CT	CC	CC	CC	CC	CC	CC	CC	CC	CC	CC	CC	CC	CT	CC	CC	CC	CC	CC	CC	CC	CT	CC	CT	CC	CT	CC	CC	CC	CC	CC	CT	CT	CC	CC	CC	CT	CC	CT	CC	CC	CC	CC
1050753	C/T	Unknown	86161683	+	CC	CC	CC	CC	CT	CC	CC	CC	CC	CC	CC	CC	CC	CT	CC	CC	CC	CC	CC	CC	CC	CC	CT	CT	CC	CT	CC	CC	CC	CT	CC	CT	CC	CC	CC	CC	CC	CT	CC	CC	CC	CC	CT	CC	CT
1052069	G/T	Unknown	86269596	+	GT	GT	GT	GG	GT	GT	GT	GT	GT	GT	GT	GT	GT	GT	GT	GT	GT	GT	GT	GT	GT	GT	GT	GT	GT	GT	GT	GT	GT	GT	GT	GT	GT	GT	GT	GT	GT	GT	GT	TT	GT	GT	GT	GT	GT
1052069	C/A	Unknown	86269610	+	CA	CC	CA	CC	CC	CA	CA	CA	CC	CC	CA	CA	CA	CA	CA	CC	CA	CC	CA	CA	CA	CA	CA	CA	CC	CA	CC	CA	CA	CA	CA	CA	CA	CA	CC	CA	CA	CC	CC	CC	CA	CC	CA	CA	CA
1054283	G/A	Unknown	86451155	+	GG	GG	GG	GG	GG	GG	GA	GG	GG	GA	GG	GG	GG	GG	GA	GG	GG	GG	GG	GG	GG	GG	GG	GG	GG	GG	GG	GG	GG	GA	GA	GA	GG	GG	GG	GG	GG	GG	GA	GG	GG	GG	GG	GG	GG
1055260	C/T	Unknown	86531285	+	CC	CC	CC	CC	CC	CC	CC	CC	CC	CC	CT	CC	CC	CC	CC	CC	CC	CC	CC	CC	CC	CC	CC	CC	CC	CC	CC	CC	CC	CC	CC	CC	CC	CC	CC	CC	CC	CC	CC	CC	CC	CC	CT	CC	CC
1055559	G/C	Unknown	86555793	+	GG	GG	GG	GG	GG	GC	GG	GG	GG	GG	GG	GG	GG	GG	GG	GG	GG	GC	GG	GG	GC	GG	GG	GC	GG	GG	GG	GG	GG	GG	GG	GG	GG	GG	GG	GG	GG	GG	GG	GG	GG	GG	GG	GG	GG
1055559	G/A	Unknown	86555824	+	GG	GG	GG	GG	GA	GA	GG	GG	GG	GA	GG	GG	GG	GG	GG	GG	GG	GA	GG	GG	GG	GG	GG	GA	GG	GA	GG	GG	GG	GG	GG	GG	GG	GG	GG	GG	GG	GG	GA	GG	GG	GG	GG	GG	GG
1056234	C/T	Unknown	86611124	+	CC	CC	CC	CC	CC	CC	CC	CC	CC	CC	CC	CC	CC	CC	CC	CC	CC	CC	CC	CC	CC	CC	CC	CC	CC	CC	CC	CC	CC	CC	CC	CC	CC	CC	CC	CC	CC	CT	CC	CC	CC	CC	CC	CC	CC
1056275	C/T	Unknown	86614509	+	CT	CC	CC	CC	CC	CC	CC	CC	CC	CC	CC	CT	CT	CC	CT	CC	CC	CC	CC	CT	CC	CC	CT	CC	CC	CC	CC	CC	CC	CC	CC	CC	CC	CC	CC	CC	CC	CC	CC	CC	CC	CT	CC	CC	CC
1056861	G/A	Unknown	86662561	+	GA	GG	GG	GG	GG	GG	GG	GG	GG	GA	GG	GG	GG	GG	GG	GG	GG	GG	GG	GG	GG	GG	GG	GG	GG	GG	GG	GG	GG	GG	GG	GG	GG	GG	GG	GG	GG	GG	GG	GG	GG	GG	GG	GG	GG
1057433	C/T	Unknown	86709456	+	CC	CC	CC	CC	CC	CC	CC	CC	CC	CC	CC	CC	CC	CC	CC	CC	CC	CC	CC	CC	CC	CC	CC	CC	CC	CC	CC	CT	CC	CC	CC	CC	CC	CC	CC	CC	CC	CC	CC	CT	CC	CC	CC	CC	CC
1057931	A/C	Unknown	86750287	+	AC	AC	AC	AC	AC	AC	AC	AC	AC	AC	AC	AC	AC	AC	AC	AC	AC	AC	AC	AC	AC	AC	AC	AC	AC	AC	AC	AC	AC	AC	AC	AC	AC	AC	AC	AC	AC	AC	AC	AC	AA	AC	AC	AC	AC
1058052	T/C	Unknown	86760212	+	TC	TT	TT	TT	TC	TC	TT	TT	TT	TC	TC	TC	TT	TT	TT	TT	TT	TT	TC	TT	TT	TT	TT	TT	TT	TC	TC	TT	TT	TT	TC	TT	TT	TT	TT	TT	TT	TT	TC	TT	TT	TC	TC	TT	TT
1058578	G/A	Unknown	86803345	+	GG	GG	GG	GG	GA	GG	GA	GG	GG	GA	GG	GG	GG	GG	GG	GA	GG	GG	GG	GG	GG	GG	GG	GG	GG	GG	GG	GG	GG	GA	GA	GG	GG	GG	GG	GG	GG	GA	GG	GG	GG	GG	GG	GG	GG
1060802	G/A	Unknown	86985702	+	GG	GG	GA	GA	GG	GG	GG	GG	GA	GG	GG	GG	GG	GG	GG	GG	GG	GG	GG	GG	GG	GG	GG	GG	GG	GG	GG	GG	GA	GG	GG	GG	GG	GG	GA	GG	GG	GG	GG	GG	GG	GG	GG	GG	GG
1061223	C/T	Unknown	87020220	+	TC	TC	TC	TC	TC	TC	TC	TC	TC	TC	TC	TC	TC	TC	TC	TC	TC	TC	TC	TC	TC	TC	TC	TC	TC	TC	TC	TC	TC	TC	TC	CC	TC	TT	TC	TC	TC	TC	TC	TC	TC	TC	TC	TC	TC
1061298	G/A	Unknown	87026392	+	GA	GA	GA	GA	GA	GA	GA	GA	GA	GA	GA	GA	GA	GA	GA	GA	GA	GA	GA	GA	GA	GA	GA	GA	GA	GA	GA	GA	GA	GA	GA	GA	GA	GA	GA	GA	GA	GA	GA	GA	GG	GA	GA	GA	GA
1061463	C/G	Unknown	87039907	+	CC	CC	CC	CC	CC	CG	CC	CC	CC	CC	CC	CG	CC	CC	CG	CC	CG	CC	CC	CG	CC	CC	CG	CC	CC	CG	CG	CC	CC	CC	CG	CC	CC	CC	CC	CC	CG	CC	CC	CC	CG	CG	CC	CC	CC
1062963	G/A	Unknown	87162938	+	GG	GG	GG	GG	GG	GG	GG	GG	GG	GG	GG	GG	GG	GG	GG	GA	GG	GG	GG	GG	GG	GG	GG	GG	GA	GG	GG	GG	GG	GG	GG	GG	GG	GA	GG	GG	GG	GG	GG	GG	GG	GG	GG	GG	GG
1063097	C/G	Unknown	87173909	+	CC	CC	CC	CC	CC	CC	CC	CC	CC	CC	CC	CC	CC	CC	CC	CC	CC	CC	CC	CC	CC	CC	CC	CC	CC	CC	CG	CG	CC	CC	CC	CC	CC	CC	CC	CC	CC	CC	CC	CC	CC	CC	CC	CC	CC
1063097	G/C	Unknown	87173912	+	GG	GG	GG	GG	GG	GG	GG	GG	GG	GG	GG	GG	GG	GG	GG	GG	GG	GG	GG	GG	GG	GG	GG	GG	GG	GG	GC	GC	GG	GG	GG	GG	GG	GG	GG	GG	GG	GG	GG	GG	GG	GC	GG	GG	GG
1063309	C/T	Unknown	87191268	+	CT	CC	CC	CC	CC	CT	CC	CT	CC	CC	CC	CC	CC	CC	CC	CC	CC	CC	CC	CC	CC	CC	CT	CC	CC	CC	CT	CC	CC	CC	CT	CC	CC	CC	CC	CC	CC	CT	CC	CC	CC	CC	CT	CC	CC
1063602	C/T	Unknown	87215293	+	CT	CC	CT	CT	CT	CT	CT	CC	CT	CT	CT	CT	CT	CT	CT	CC	CT	CT	CT	CC	CT	CT	CC	CT	CT	CT	CT	CT	CT	CT	CT	CT	CT	CT	CT	CT	CT	CT	CT	CT	CT	CT	CT	CT	CT
1063602	C/T	Unknown	87215309	+	CC	CC	CC	CC	CC	CC	CC	CC	CC	CC	CC	CC	CC	CC	CC	CC	CC	CC	CC	CC	CC	CC	CC	CC	CT	CC	CC	CC	CC	CT	CC	CC	CC	CC	CC	CC	CC	CT	CC	CT	CC	CC	CT	CC	CC
1063920	G/A	Unknown	87241392	+	GG	GG	GG	GG	GG	GG	GG	GG	GG	GG	GG	GG	GG	GG	GG	GA	GG	GG	GG	GG	GG	GG	GG	GG	GG	GG	GG	GG	GG	GG	GG	GG	GG	GG	GG	GG	GG	GG	GG	GG	GG	GG	GG	GG	GG
1065213	T/A	Unknown	87347417	+	TT	TT	TT	TT	TT	TT	TT	TT	TT	TT	TT	TT	TT	TT	TT	TT	TT	TT	TT	TT	TT	TT	TT	TT	TA	TT	TT	TT	TT	TT	TT	TT	TT	TT	TT	TT	TT	TT	TT	TT	TT	TT	TT	TT	TT
1065423	G/A	Unknown	87364614	+	GG	GG	GG	GG	GG	GG	GG	GG	GG	GG	GG	GG	GG	GG	GG	GG	GG	GG	GG	GG	GG	GG	GG	GG	GG	GG	GG	GG	GG	GG	GG	GG	GG	GG	GG	GG	GG	GG	GG	GG	GA	GG	GG	GG	GG
1068221	T/A	Unknown	87594077	+	TT	TA	TT	TA	TA	TT	TA	TA	TA	TA	TA	TA	TT	TA	TA	TT	TT	TA	TA	TA	TT	TT	TT	TA	TT	TT	TT	TA	TA	TT	TT	TA	TA	TA	TA	TA	TA	TA	TA	TA	TA	TT	TA	TT	TA
1068889	C/A	Unknown	87648842	+	CC	CC	CC	CC	CC	CC	CC	CA	CC	CC	CC	CC	CC	CC	CC	CC	CC	CC	CC	CC	CC	CC	CC	CC	CC	CC	CC	CC	CC	CC	CC	CC	CC	CA	CC	CC	CC	CA	CC	CC	CC	CC	CC	CC	CA
1069313	G/A	Unknown	87683593	+	GG	GG	GG	GG	GG	GG	GG	GG	GG	GG	GG	GG	GG	GG	GG	GG	GG	GG	GG	GG	GG	GG	GG	GG	GG	GG	GG	GG	GG	GG	GG	GG	GG	GG	GG	GG	GG	GG	GG	GG	GG	GG	GG	GG	GG
1069313	C/T	Unknown	87683637	+	CC	CC	CC	CC	CC	CC	CC	CC	CC	CC	CC	CC	CC	CC	CC	CC	CC	CC	CC	CC	CC	CC	CC	CC	CC	CC	CC	CC	CC	CC	CC	CC	CC	CC	CC	CC	CC	CC	CC	CC	CC	CC	CC	CC	CC
1070315	C/T	Unknown	87765799	+	CC	CC	CC	CC	CC	CC	CC	CC	CC	CC	CT	CC	CC	CC	CC	CC	CC	CC	CC	CC	CC	CC	CC	CC	CC	CC	CC	CC	CC	CC	CC	CC	CC	CC	CC	CC	CT	CT	CC	CT	CC	CT	CC	CC	CC
1070637	G/A	Unknown	87792203	+	GG	GG	GG	GG	GG	GG	GG	GG	GG	GG	GG	GG	GG	GG	GG	GG	GG	GG	GG	GG	GG	GG	GA	GG	GA	GG	GG	GG	GG	GG	GG	GA	GG	GG	GG	GG	GG	GA	GG	GG	GG	GG	GG	GG	GG
1071393	G/C	Unknown	87854165	+	GG	GG	GG	GG	GG	GG	GG	GG	GG	GG	GG	GC	GG	GG	GG	GG	GC	GG	GG	GC	GG	GG	GC	GG	GG	GG	GC	GG	GG	GC	GC	GG	GG	GG	GG	GG	GC	GG	GG	GG	GC	GG	GG	GG	GG
1071724	G/A	Unknown	87881312	+	GA	GA	GG	GA	GA	GA	GA	GA	GA	GA	GG	GA	GA	GA	GA	GA	GA	GA	GA	GA	GA	GA	GA	GA	GG	GA	GA	GA	GA	GA	GA	GA	GA	GA	GA	GA	GA	GA	GA	GA	GA	GA	GA	GA	GA
1071724	C/T	Unknown	87881329	+	CT	CT	CC	CT	CT	CT	CT	CT	CT	CT	CC	CT	CT	CT	CT	CT	CT	CT	CT	CT	CT	CT	CT	CT	CC	CT	CT	CT	CT	CT	CT	CT	CT	CT	CT	CT	CT	CT	CT	CT	CT	CT	CT	CT	CT
1071742	G/T	Unknown	87882800	+	GG	GG	GG	GT	GG	GG	GG	GG	GG	GG	GT	GG	GG	GG	GG	GG	GG	GG	GG	GG	GG	GG	GT	GG	GG	GG	GG	GG	GG	GG	GG	GG	GG	GT	GG	GG	GG	GG	GG	GG	GG	GG	GG	GG	GG
1072166	A/G	Unknown	87917557	+	AA	AA	AA	AA	AG	AA	AA	AA	AA	AA	AA	AA	AA	AA	AA	AA	AA	AA	AA	AA	AA	AA	AA	AA	AA	AA	AA	AA	AA	AA	AG	AA	AA	AA	AA	AA	AA	AA	AG	AA	AA	AA	AA	AA	AA
1072166	T/A	Unknown	87917566	+	TA	TA	TT	TT	TA	TA	TT	TT	TT	TA	TA	TA	TA	TA	TT	TA	TA	TA	TA	TA	TA	TA	TT	TA	TA	TA	TA	TA	TA	TA	TT	TA	TA	TA	TA	TA	TA	TA	TA	TT	TA	TA	TA	TA	TA
1072672	G/A	Unknown	87959051	+	GG	GG	GG	GG	GG	GG	GG	GA	GA	GG	GG	GG	GG	GG	GG	GG	GG	GA	GG	GG	GG	GG	GA	GG	GG	GG	GG	GG	GG	GA	GG	GG	GG	GG	GG	GG	GG	GG	GG	GG	GA	GG	GG	GG	GG
1073624	T/C	Unknown	88037094	+	TC	TC	TC	TC	TC	TC	TC	TC	TC	TC	TC	TC	TC	TC	TC	TT	TC	TC	TC	TC	TC	TC	TC	TC	CC	TC	TC	TC	TC	TC	TC	TC	TC	TC	TC	TC	TC	TC	TC	TC	TC	CC	TC	TC	TC
1075421	G/T	Unknown	88184459	+	GG	GG	GG	GG	GG	GG	GG	GG	GG	GG	GT	GG	GG	GG	GG	GG	GG	GG	GG	GG	GG	GG	GG	GG	GG	GG	GG	GG	GT	GG	GG	GG	GG	GG	GG	GG	GG	GG	GG	GG	GG	GG	GG	GG	GG
1075644	G/T	Unknown	88202771	+	GG	GG	GG	GG	GG	GG	GG	GG	GG	GG	GG	GG	GG	GG	GG	GG	GG	GG	GG	GG	GG	GG	GT	GG	GG	GG	GG	GG	GG	GG	GG	GG	GG	GG	GG	GG	GG	GG	GG	GT	GG	GT	GT	GG	GG
1078139	G/A	Unknown	88407323	+	GG	GG	GG	GG	GG	GG	GG	GG	GG	GG	GG	GG	GG	GG	GG	GG	GG	GG	GG	GG	GG	GG	GG	GG	GG	GG	GG	GG	GG	GG	GG	GG	GG	GG	GG	GG	GA	GG	GG	GG	GG	GG	GG	GG	GG
1079042	G/A	Unknown	88481417	+	GG	GG	GG	GG	GG	GG	GG	GG	GG	GG	GA	GG	GG	GG	GG	GG	GG	GG	GG	GG	GG	GG	GG	GG	GG	GG	GG	GG	GG	GG	GG	GG	GG	GA	GG	GG	GG	GG	GG	GG	GG	GG	GG	GG	GG
1079671	C/G	Unknown	88532948	+	CC	CC	CC	CC	CC	CC	CC	CC	CC	CC	CC	CC	CG	CC	CG	CC	CC	CC	CC	CC	CC	CC	CG	CC	CC	CC	CC	CC	CG	CC	CC	CC	CC	CC	CC	CC	CC	CC	CC	CC	CC	CC	CC	CC	CC
1079883	C/T	Unknown	88550341	+	CT	CC	CC	CC	CC	CC	CC	CC	CC	CC	CC	CC	CC	CC	CT	CC	CT	CC	CC	CC	CC	CC	CC	CC	CT	CC	CT	CC	CC	CC	CC	CT	CC	CT	CC	CC	CC	CC	CC	CC	CC	CT	CC	CT	CC
1080295	G/A	Unknown	88584130	+	GA	GG	GG	GG	GG	GG	GG	GG	GA	GG	GG	GG	GG	GG	GG	GG	GG	GG	GG	GG	GG	GG	GG	GG	GG	GG	GG	GG	GG	GG	GG	GA	GG	GG	GA	GG	GG	GG	GG	GG	GG	GG	GG	GG	GG
1080484	G/A	Unknown	88599613	+	GA	GA	GA	GA	GA	GA	GA	GA	GA	GA	GA	GA	GA	GA	GA	GA	GA	GA	GA	GA	GA	GA	GA	GA	GA	GA	GA	GA	GA	GA	GA	GA	GA	GA	GA	GA	GA	GA	GA	GA	GA	GA	GA	GA	GA
1080484	C/G	Unknown	88599637	+	CG	CG	CG	CG	CG	CG	CG	CG	CG	CG	CG	CG	CG	CG	CG	CG	CG	CG	CG	CG	CG	CG	CG	CG	CG	CG	CG	CG	CG	CG	CG	CG	CG	CG	CG	CG	CG	CG	CG	CG	CG	CG	CG	CG	CG
1080511	C/T	Unknown	88601862	+	CT	CC	CT	CC	CC	CC	CC	CC	CC	CC	CC	CC	CC	CC	CC	CC	CC	CC	CC	CC	CC	CC	CC	CT	CC	CT	CC	CT	CC	CC	CC	CC	CC	CT	CC	CC	CC	CC	CT	CC	CC	CC	CC	CC	CC
1080532	C/A	Unknown	88603587	+	CC	CC	CC	CC	CC	CC	CC	CA	CC	CC	CC	CC	CC	CC	CC	CC	CC	CC	CC	CC	CC	CC	CC	CC	CC	CC	CC	CC	CC	CA	CC	CC	CC	CC	CC	CC	CC	CC	CC	CC	CC	CC	CC	CC	CC
1081488	C/T	Unknown	88681954	+	CC	CC	CC	CC	CC	CC	CC	CT	CC	CT	CT	CC	CC	CC	CC	CC	CC	CC	CC	CC	CC	CC	CC	CC	CC	CC	CC	CC	CC	CC	CC	CC	CC	CC	CC	CC	CC	CC	CC	CC	CC	CC	CC	CC	CC
1083199	C/G	Unknown	88822260	+	CC	CG	CG	CG	CG	CG	CG	CG	CG	CG	CG	CG	CG	CG	CC	CG	CG	CG	CG	CG	CG	CG	CC	CG	CG	CG	CG	CC	CG	CC	CG	CG	CG	CG	CG	CG	CG	CC	CC	CG	CC	CG	CG	CG	CG
1083199	C/A	Unknown	88822317	+	CC	CA	CA	CA	CA	CA	CA	CA	CA	CA	CC	CA	CA	CA	CC	CA	CA	CA	CA	CA	CA	CA	CC	CA	CA	CA	CA	CC	CA	CC	CA	CA	CA	CA	CA	CA	CA	CC	CC	CA	CC	CA	CA	CA	CA
1084568	C/G	Unknown	88934503	+	CC	CC	CC	CC	CC	CC	CC	CC	CC	CC	CC	CC	CC	CC	CG	CC	CC	CC	CC	CC	CC	CC	CG	CC	CG	CC	CC	CC	CC	CC	CC	CC	CC	CC	CC	CC	CC	CC	CC	CC	CG	CC	CC	CC	CC
1084720	G/C	Unknown	88946978	+	GC	GG	GG	GC	GG	GG	GG	GG	GG	GG	GG	GG	GG	GG	GG	GG	GG	GG	GG	GG	GG	GG	GG	GG	GG	GG	GG	GG	GG	GG	GG	GG	GG	GC	GG	GG	GG	GC	GG	GC	GG	GG	GC	GG	GC
1086595	T/A	Unknown	89100716	+	TA	TT	TT	TT	TA	TT	TT	TA	TA	TT	TT	TT	TT	TT	TT	TT	TT	TT	TT	TT	TT	TT	TT	TT	TT	TT	TT	TT	TT	TT	TT	TA	TT	TA	TT	TT	TT	TT	TT	TT	TT	TT	TT	TT	TT
1087588	G/A	Unknown	89182148	+	GG	GG	GG	GG	GG	GG	GG	GG	GA	GG	GG	GG	GG	GG	GG	GG	GG	GG	GG	GG	GG	GG	GG	GG	GA	GG	GG	GA	GG	GG	GG	GG	GG	GG	GG	GG	GG	GG	GG	GG	GG	GG	GG	GG	GG
1089277	A/G	Unknown	89320644	+	AA	AA	AA	AA	AA	AA	AG	AA	AA	AG	AA	AA	AA	AA	AA	AA	AA	AA	AA	AA	AA	AA	AG	AA	AA	AA	AA	AA	AA	AA	AG	AA	AA	AA	AA	AA	AA	AA	AG	AA	AA	AA	AG	AA	AA
1090455	G/A	Unknown	89417284	+	GG	GG	GG	GG	GG	GG	GG	GA	GG	GG	GG	GG	GG	GG	GA	GG	GG	GG	GG	GG	GG	GG	GG	GG	GG	GG	GA	GG	GG	GG	GG	GG	GG	GG	GG	GG	GG	GG	GG	GG	GG	GG	GG	GG	GG
1090688	G/C	Unknown	89436399	+	GG	GG	GG	GG	GG	GG	GG	GG	GG	GG	GG	GG	GG	GG	GG	GG	GG	GC	GG	GG	GG	GG	GC	GG	GG	GG	GG	GG	GG	GG	GG	GG	GG	GG	GG	GG	GG	GG	GG	GG	GG	GG	GG	GG	GG
1091052	A/T	Unknown	89466213	+	AT	AA	AA	AA	AT	AA	AA	AT	AA	AA	AA	AA	AA	AA	AT	AA	AA	AA	AA	AA	AA	AA	AA	AA	AA	AA	AA	AA	AA	AA	AA	AA	AA	AA	AA	AA	AA	AT	AA	AA	AA	AT	AA	AA	AA
1091233	G/T	Unknown	89481055	+	GG	GG	GG	GG	GG	GG	GG	GG	GG	GT	GG	GG	GG	GG	GG	GG	GG	GG	GG	GG	GG	GG	GG	GG	GG	GG	GG	GG	GG	GG	GG	GG	GG	GG	GG	GG	GG	GG	GG	GG	GG	GG	GG	GG	GG
1092199	C/G	Unknown	89560271	+	CG	CC	CC	CC	CG	CC	CG	CC	CC	CG	CC	CC	CC	CC	CC	CG	CC	CC	CC	CC	CC	CC	CC	CC	CC	CC	CC	CC	CC	CC	CC	CG	CG	CC	CC	CC	CC	CC	CC	CC	CC	CC	CC	CC	CC
1092616	G/A	Unknown	89594481	+	GA	GG	GG	GG	GA	GG	GG	GA	GG	GG	GG	GG	GA	GG	GG	GA	GG	GG	GG	GG	GA	GG	GG	GA	GG	GG	GG	GA	GA	GG	GG	GG	GG	GG	GG	GG	GA	GA	GA	GG	GA	GA	GA	GG	GA
1093194	G/A	Unknown	89641832	+	GG	GG	GG	GG	GG	GG	GG	GG	GA	GG	GG	GG	GG	GG	GG	GG	GG	GG	GG	GG	GG	GG	GG	GG	GA	GG	GG	GA	GG	GA	GG	GG	GG	GG	GG	GG	GG	GG	GA	GG	GG	GG	GG	GG	GG
1093812	C/T	Unknown	89692531	+	CC	CC	CC	CC	CC	CC	CC	CC	CC	CC	CC	CC	CC	CC	CC	CC	CC	CC	CC	CC	CC	CC	CC	CC	CT	CC	CC	CC	CC	CC	CC	CC	CC	CC	CC	CC	CC	CC	CC	CC	CC	CC	CC	CC	CC
1094014	C/T	Unknown	89709073	+	CC	CC	CC	CC	CC	CC	CC	CC	CT	CC	CC	CC	CC	CC	CC	CC	CC	CC	CC	CC	CC	CC	CC	CC	CC	CC	CC	CC	CC	CC	CC	CC	CC	CC	CC	CC	CC	CC	CC	CC	CT	CC	CC	CC	CC
1094014	G/T	Unknown	89709074	+	GG	GG	GG	GG	GG	GG	GG	GG	GT	GG	GG	GG	GG	GG	GG	GG	GG	GG	GG	GG	GG	GG	GG	GG	GG	GG	GG	GG	GG	GG	GG	GG	GG	GG	GG	GG	GG	GG	GG	GG	GT	GG	GG	GG	GG
1094077	C/T	Unknown	89714296	+	CC	CC	CC	CC	CC	CC	CC	CC	CC	CC	CC	CC	CC	CC	CC	CC	CC	CC	CC	CC	CC	CC	CC	CC	CC	CC	CC	CC	CC	CC	CC	CC	CC	CC	CC	CC	CC	CC	CT	CC	CC	CC	CC	CC	CC
1094113	C/A	Unknown	89717223	+	CA	CC	CC	CC	CC	CC	CC	CC	CC	CC	CC	CC	CC	CC	CC	CC	CC	CC	CC	CC	CC	CC	CC	CC	CC	CC	CC	CC	CC	CC	CA	CA	CC	CA	CC	CC	CC	CC	CC	CC	CC	CC	CC	CC	CC
1094192	G/T	Unknown	89723680	+	GG	GG	GG	GG	GG	GG	GG	GT	GG	GT	GG	GG	GG	GG	GT	GG	GG	GG	GG	GG	GG	GG	GG	GG	GG	GG	GG	GG	GG	GG	GG	GG	GG	GG	GG	GG	GG	GG	GG	GG	GG	GG	GG	GG	GG
1094567	C/G	Unknown	89754456	+	CG	CC	CC	CC	CC	CG	CC	CC	CG	CC	CC	CC	CC	CC	CC	CC	CC	CC	CC	CC	CG	CC	CC	CC	CC	CC	CC	CC	CC	CC	CC	CG	CC	CC	CC	CC	CC	CC	CC	CC	CC	CC	CC	CC	CC
1095123	C/T	Unknown	89800021	+	CC	CC	CC	CC	CC	CC	CC	CC	CC	CT	CC	CC	CC	CC	CC	CC	CC	CC	CC	CC	CC	CC	CT	CC	CT	CC	CC	CC	CC	CC	CC	CC	CC	CC	CC	CC	CT	CC	CC	CC	CT	CT	CT	CC	CC
1095185	G/A	Unknown	89805118	+	GG	GG	GG	GG	GG	GG	GG	GG	GG	GG	GG	GG	GG	GG	GG	GG	GG	GG	GG	GG	GG	GG	GG	GG	GA	GG	GG	GG	GG	GG	GA	GG	GG	GG	GG	GG	GG	GG	GG	GG	GG	GG	GG	GG	GG
1095670	G/A	Unknown	89844891	+	GG	GG	GG	GA	GG	GA	GA	GG	GG	GG	GG	GG	GG	GG	GG	GG	GG	GG	GG	GG	GG	GG	GA	GG	GG	GG	GG	GG	GG	GG	GG	GG	GG	GG	GG	GG	GG	GG	GG	GG	GG	GG	GA	GG	GG
1095670	G/A	Unknown	89844893	+	GA	GG	GG	GG	GG	GA	GG	GG	GA	GG	GG	GG	GG	GG	GG	GG	GG	GG	GG	GG	GG	GA	GG	GG	GG	GG	GA	GG	GG	GG	GG	GA	GG	GG	GG	GG	GG	GG	GA	GG	GG	GA	GG	GG	GG
1095724	A/C	Unknown	89849304	+	AC	AA	AC	AC	AC	AC	AC	AC	AA	AA	AC	AC	AC	AC	AC	AC	AC	AC	AC	AC	AC	AC	AC	AC	AC	AC	AC	AC	AC	AC	AC	AC	AC	AC	AA	AC	AC	AC	AC	AC	AC	AC	AC	AC	AC
1096549	T/C	Unknown	89916981	+	TT	TT	TT	TC	TT	TT	TC	TT	TT	TC	TC	TT	TC	TT	TC	TC	TT	TT	TC	TC	TT	TT	TC	TT	TC	TC	TC	TC	TT	TC	TT	TC	TT	TT	TT	TT	TT	TT	TT	TT	TT	TT	TT	TT	TT
1098313	A/T	Unknown	90061587	+	AA	AA	AA	AA	AA	AA	AA	AA	AA	AA	AA	AA	AA	AA	AA	AA	AA	AA	AA	AA	AA	AA	AA	AA	AT	AA	AA	AA	AA	AA	AA	AA	AA	AA	AA	AA	AA	AA	AA	AA	AA	AA	AA	AA	AA
1099382	G/A	Unknown	90149259	+	GA	GA	GA	GA	GA	GA	GA	GA	GA	GA	GA	GA	GA	GA	GA	GA	GA	GA	GA	GA	GA	GG	GA	GA	GA	GA	GA	GA	GA	GA	GA	GA	GA	GA	GA	GA	GA	GA	GA	GA	GA	GA	GA	GG	GA
1099382	G/A	Unknown	90149271	+	GG	GG	GG	GA	GA	GA	GG	GG	GG	GG	GG	GA	GG	GG	GG	GG	GG	GG	GG	GG	GG	GG	GA	GG	GG	GG	GG	GG	GA	GG	GG	GG	GG	GG	GG	GG	GG	GA	GG	GG	GG	GG	GG	GG	GG
1099429	G/T	Unknown	90153125	+	GG	GG	GG	GG	GG	GT	GG	GG	GG	GG	GG	GG	GG	GG	GG	GG	GG	GT	GG	GG	GG	GG	GG	GG	GG	GG	GG	GG	GG	GG	GG	GT	GG	GG	GG	GG	GG	GG	GG	GT	GG	GG	GG	GG	GG
1101694	G/T	Unknown	90338892	+	GG	GG	GG	GG	GG	GG	GG	GG	GG	GG	GG	GG	GG	GG	GG	GG	GG	GG	GG	GG	GG	GG	GG	GG	GG	GG	GG	GG	GG	GG	GG	GG	GG	GG	GG	GG	GG	GG	GG	GG	GG	GG	GG	GG	GG
1102634	G/A	Unknown	90415925	+	GG	GA	GA	GA	GA	GG	GA	GA	GA	GA	GA	GA	GA	GG	GA	GA	GA	GA	GA	GA	GA	GA	GA	GA	GA	GA	GA	GA	GA	GA	GA	GA	GA	GA	GA	GA	GA	GA	GG	GA	GA	GG	GA	GA	GA
1103469	G/A	Unknown	90484387	+	GA	GG	GA	GA	GG	GG	GA	GA	GG	GG	GG	GA	GA	GA	GG	GA	GA	GA	GA	GA	GA	GA	GA	GA	GA	GG	GG	GA	GA	GA	GG	GG	GA	GG	GA	GA	GA	GG	GG	GA	GA	GA	GG	GA	GA
1103469	G/A	Unknown	90484400	+	GA	GG	GA	GA	GG	GG	GA	GA	GG	GG	GG	GA	GA	GA	GG	GA	GA	GA	GA	GA	GA	GA	GA	GA	GA	GG	GG	GA	GA	GA	GG	GG	GA	GG	GA	GA	GA	GG	GG	GA	GA	GA	GG	GA	GA
1104514	C/T	Unknown	90570079	+	CT	CT	CT	CT	CT	CT	CC	CT	CT	CT	CT	CT	CT	CT	CT	CC	CT	CT	CT	CT	CT	CT	CT	CT	CT	CT	CT	CT	CT	CT	CT	CT	CT	CT	CT	CT	CT	CT	CT	CT	CT	CT	CT	CT	CT
1104731	T/G	Unknown	90587933	+	TT	TT	TT	TT	TT	TT	TT	TT	TG	TG	TT	TT	TT	TT	TG	TT	TT	TT	TT	TT	TT	TT	TT	TT	TT	TG	TT	TT	TT	TG	TT	TG	TT	TT	TT	TT	TT	TT	TT	TT	TT	TT	TT	TT	TT
1105182	C/T	Unknown	90624850	+	CC	CC	CC	CC	CC	CC	CT	CC	CC	CC	CC	CC	CC	CC	CC	CC	CC	CC	CC	CC	CC	CC	CT	CC	CC	CC	CC	CC	CC	CC	CC	CC	CC	CC	CC	CC	CC	CC	CT	CT	CC	CC	CC	CC	CC
1105806	T/G	Unknown	90676041	+	TG	TG	TG	TG	TG	TG	TG	TG	TG	TG	TG	TG	TG	TG	TG	TG	TG	TG	TG	TG	TG	TG	GG	TG	TG	TG	TG	TG	TG	TG	TG	TG	TG	TG	TG	TG	TG	TG	TG	TG	TG	TG	TG	TG	TG
1106164	C/G	Unknown	90705382	+	CC	CC	CC	CC	CC	CC	CC	CC	CC	CC	CC	CC	CC	CC	CC	CC	CC	CC	CC	CC	CC	CC	CC	CC	CC	CC	CC	CC	CC	CC	CC	CC	CC	CC	CC	CC	CC	CC	CC	CC	CC	CC	CC	CC	CC
1106218	C/T	Unknown	90709827	+	CC	CT	CC	CC	CC	CC	CC	CT	CC	CC	CC	CC	CC	CC	CC	CC	CC	CC	CC	CC	CC	CC	CT	CT	CC	CC	CC	CC	CC	CT	CC	CC	CC	CC	CC	CC	CC	CC	CC	CC	CC	CC	CC	CC	CC
1106243	T/C	Unknown	90711892	+	TT	TT	TT	TT	TT	TT	TC	TT	TT	TT	TT	TT	TT	TT	TT	TT	TT	TT	TT	TT	TT	TT	TT	TT	TT	TT	TT	TT	TT	TC	TT	TT	TT	TT	TT	TT	TT	TT	TT	TT	TT	TT	TT	TT	TT
1106335	A/G	Unknown	90719423	+	AG	AA	AA	AG	AG	AA	AA	AG	AA	AA	AA	AA	AA	AA	AA	AA	AA	AA	AA	AA	AA	AA	AA	AA	AA	AA	AA	AA	AA	AA	AA	AA	AG	AA	AA	AA	AA	AG	AA	AA	AG	AA	AA	AA	AA
1106346	C/T	Unknown	90720304	+	CC	CT	CT	CC	CC	CC	CC	CC	CT	CC	CC	CC	CC	CC	CC	CT	CC	CC	CC	CC	CC	CC	CC	CC	CC	CC	CT	CC	CC	CC	CC	CC	CC	CT	CC	CC	CC	CC	CT	CC	CC	CT	CC	CC	CC
1106710	G/A	Unknown	90750153	+	GG	GG	GG	GG	GG	GG	GG	GG	GG	GG	GG	GG	GG	GG	GG	GG	GG	GG	GG	GG	GG	GG	GG	GG	GG	GG	GG	GG	GA	GG	GG	GG	GG	GA	GG	GG	GG	GG	GG	GG	GA	GG	GG	GG	GG
1106729	C/T	Unknown	90751712	+	CT	CT	CC	CT	CT	CT	CT	CT	CT	CT	CT	CT	CT	CT	CT	CT	CT	CT	CT	CT	CT	CT	CT	CT	CT	CT	CT	CT	CT	CT	CT	CC	CT	CT	CC	CT	CT	CT	CT	CT	CT	CT	CC	CT	CT
1106736	G/C	Unknown	90752277	+	GG	GG	GG	GG	GG	GG	GG	GG	GG	GG	GG	GG	GG	GG	GG	GG	GG	GG	GG	GG	GG	GG	GG	GG	GG	GG	GG	GG	GG	GC	GC	GG	GG	GG	GG	GG	GG	GG	GG	GG	GG	GG	GC	GG	GG
1106736	G/C	Unknown	90752292	+	GG	GG	GG	GG	GG	GG	GG	GG	GG	GG	GG	GG	GG	GG	GG	GG	GG	GG	GG	GG	GG	GG	GG	GG	GG	GG	GG	GG	GG	GC	GC	GG	GG	GG	GG	GG	GG	GG	GG	GG	GG	GG	GC	GG	GG
1106835	G/A	Unknown	90760424	+	GG	GG	GG	GG	GG	GG	GG	GG	GG	GG	GG	GG	GG	GG	GA	GG	GG	GG	GG	GG	GG	GG	GG	GG	GG	GG	GG	GG	GG	GG	GG	GG	GG	GG	GG	GG	GG	GG	GG	GG	GG	GG	GG	GG	GG
1106857	C/T	Unknown	90762250	+	CC	CC	CC	CC	CC	CC	CC	CC	CC	CC	CC	CC	CC	CC	CC	CC	CC	CC	CC	CC	CC	CC	CC	CC	CC	CC	CC	CC	CC	CC	CC	CC	CC	CC	CT	CC	CC	CC	CC	CC	CC	CC	CC	CT	CC
1107164	C/T	Unknown	90787394	+	CC	CT	CC	CC	CC	CC	CC	CC	CT	CT	CT	CT	CT	CT	CT	CT	CT	CT	CT	CC	CC	CT	CC	CT	CT	CT	CT	CT	CT	CT	CT	CT	CT	CT	CT	CC	CC	CT	CC	CT	CT	CC	CT	CT	CT
1108123	G/T	Unknown	90866026	+	GG	GG	GG	GG	GG	GG	GG	GG	GG	GG	GG	GG	GG	GG	GG	GG	GG	GG	GG	GG	GG	GG	GT	GG	GT	GG	GG	GG	GG	GG	GG	GG	GG	GT	GG	GG	GG	GG	GG	GG	GG	GG	GT	GG	GG
1108449	G/A	Unknown	90892752	+	GG	GG	GA	GG	GG	GG	GG	GG	GG	GG	GG	GG	GG	GG	GG	GG	GG	GG	GG	GG	GG	GG	GA	GG	GA	GG	GG	GG	GG	GG	GG	GA	GA	GG	GG	GG	GG	GG	GG	GG	GG	GG	GA	GG	GG
1108449	C/G	Unknown	90892761	+	CC	GC	GC	GC	GC	GC	GC	GC	GC	GC	GC	GC	GC	GC	GC	GC	GC	GC	GC	GC	GC	GC	GC	GC	GC	GC	GC	GC	GC	GC	GC	GC	GC	GC	GC	GC	GC	GC	GC	GC	GC	GC	GC	GC	GC
1108505	T/G	Unknown	90897358	+	TG	TG	TG	TG	TG	TG	TG	TG	TG	TG	TG	TG	TG	TG	TG	TG	TG	TG	TG	TG	TG	TG	TG	TG	TG	TG	TG	TG	TG	TG	TG	TG	TG	TG	TG	TG	TG	TG	TG	TG	TG	TG	TG	TG	TG
1108505	C/T	Unknown	90897379	+	CC	CC	CC	CC	CC	CC	CC	CC	CC	CC	CC	CC	CT	CC	CC	CC	CC	CC	CC	CC	CC	CC	CC	CC	CT	CC	CC	CT	CC	CC	CC	CT	CC	CT	CC	CC	CC	CC	CC	CC	CC	CT	CC	CC	CC
1109005	G/A	Unknown	90938373	+	GG	GG	GG	GG	GG	GG	GG	GG	GG	GG	GG	GG	GG	GG	GG	GG	GG	GG	GG	GG	GA	GG	GG	GG	GG	GG	GG	GG	GG	GG	GG	GG	GG	GG	GG	GG	GG	GG	GG	GG	GG	GA	GG	GG	GG
1109771	T/C	Unknown	91001169	+	TC	TC	TC	TC	TC	TC	TC	TC	TC	TC	TC	TC	TC	TC	TC	TC	TC	TC	TC	TT	TC	TC	TC	TC	TC	TC	TC	TC	TC	TC	TC	TT	TC	TC	TC	TC	TC	TC	TC	TC	TC	TC	TC	TC	TC
1110334	G/C	Unknown	91047353	+	GG	GG	GG	GG	GG	GG	GG	GG	GG	GG	GG	GG	GG	GG	GG	GG	GG	GG	GG	GC	GG	GG	GG	GG	GG	GG	GG	GG	GG	GG	GG	GG	GG	GG	GG	GG	GG	GC	GG	GG	GG	GG	GG	GG	GG
1110489	G/A	Unknown	91060023	+	GG	GA	GG	GG	GG	GG	GA	GG	GG	GG	GG	GG	GG	GG	GG	GG	GG	GG	GG	GG	GG	GG	GG	GA	GG	GG	GG	GG	GG	GG	GA	GA	GG	GA	GG	GG	GG	GG	GG	GG	GG	GG	GG	GG	GG
1110728	G/A	Unknown	91079632	+	GA	GA	GG	GA	GA	GA	GA	GA	GA	GA	GA	GA	GA	GA	GA	GA	GA	GA	GA	GA	GA	GA	GA	GA	GA	GA	GA	GA	GA	GA	GA	GA	GA	GA	GA	GA	GA	GA	GA	GA	GA	GA	GA	GA	GA
1110782	G/A	Unknown	91084048	+	GG	GG	GG	GG	GG	GG	GG	GG	GG	GG	GG	GG	GG	GG	GG	GG	GG	GG	GG	GA	GG	GG	GG	GG	GA	GG	GA	GG	GG	GG	GG	GG	GG	GA	GG	GG	GG	GG	GG	GG	GG	GG	GG	GG	GG
1110784	C/G	Unknown	91084242	+	CC	CC	CC	CC	CC	CC	CC	CC	CC	CC	CC	CC	CC	CC	CC	CC	CC	CC	CC	CC	CC	CC	CC	CG	CC	CC	CC	CC	CC	CC	CC	CC	CC	CC	CC	CC	CC	CC	CG	CC	CC	CC	CC	CC	CC
1110803	T/A	Unknown	91085800	+	TT	TA	TT	TA	TA	TT	TT	TT	TA	TT	TT	TT	TT	TT	TT	TT	TT	TT	TT	TT	TT	TT	TA	TA	TA	TT	TT	TT	TT	TA	TT	TA	TA	TT	TT	TT	TT	TT	TT	TA	TT	TA	TA	TT	TT
1111002	C/A	Unknown	91102121	+	CA	CC	CA	CC	CC	CC	CA	CC	CC	CA	CC	CC	CC	CC	CC	CC	CC	CC	CA	CC	CA	CA	CA	CC	CA	CA	CC	CA	CA	CC	CC	CC	CA	CC	CC	CA	CA	CA	CC	CC	CA	CA	CC	CA	CC
1111153	C/T	Unknown	91114484	+	CC	CT	CT	CC	CC	CC	CT	CT	CT	CT	CT	CC	CC	CT	CC	CT	CC	CC	CT	CT	CT	CT	CC	CT	CC	CT	CC	CT	CT	CT	CC	CC	CT	CT	CT	CT	CT	CC	CC	CC	CT	CC	CT	CT	CT
1111671	A/G	Unknown	91156971	+	AG	AA	AA	AA	AA	AA	AA	AA	AA	AA	AA	AA	AA	AG	AA	AA	AA	AA	AA	AA	AA	AA	AA	AA	AA	AA	AA	AA	AA	AA	AG	AA	AA	AA	AA	AA	AA	AG	AA	AA	AG	AA	AA	AA	AA
1111905	C/T	Unknown	91176137	+	CC	CC	CC	CC	CC	CC	CC	CC	CC	CC	CC	CC	CC	CC	CC	CC	CC	CC	CC	CC	CC	CC	CC	CC	CC	CC	CC	CC	CC	CC	CC	CC	CC	CC	CC	CC	CC	CT	CC	CC	CC	CC	CC	CC	CC
1111905	T/C	Unknown	91176149	+	TT	TT	TT	TT	TT	TT	TT	TT	TT	TT	TT	TT	TT	TT	TT	TT	TT	TT	TT	TT	TT	TT	TT	TT	TT	TT	TT	TT	TT	TT	TT	TT	TT	TT	TT	TT	TT	TC	TT	TT	TT	TT	TT	TT	TT
1112018	G/T	Unknown	91185416	+	GT	GT	GT	GT	GT	GT	GT	GT	GT	GT	GT	GT	GT	GT	GT	GT	GT	GT	GT	GT	GT	GT	GG	GT	GT	GT	GT	GT	GT	GT	GT	TT	GT	GT	GT	GT	GT	GT	GT	GT	GT	GT	GT	GT	GT
1112018	G/C	Unknown	91185426	+	GC	GC	GC	GC	GC	GC	GC	GC	GC	GC	GC	GC	GC	GC	GC	GC	GC	GC	GC	GC	GC	GC	GG	GC	GC	GC	GC	GC	GC	GC	GC	CC	GC	GC	GC	GC	GC	GC	GC	GC	GC	GC	GC	GC	GC
1112027	A/G	Unknown	91186139	+	AA	AG	AG	AG	AG	AG	AG	AA	AG	AG	AA	AG	AG	AG	AG	AG	AA	AG	AG	AG	AG	AG	AG	AG	AG	AG	AG	AG	AA	AG	AG	AA	AG	AG	AG	AG	AG	AA	AG	AG	AG	AG	AG	AG	AG
1112027	G/A	Unknown	91186182	+	GG	GA	GG	GG	GG	GG	GA	GG	GG	GG	GG	GG	GG	GG	GG	GG	GG	GG	GG	GA	GG	GG	GA	GG	GG	GG	GA	GG	GG	GG	GG	GG	GA	GG	GG	GG	GG	GG	GG	GA	GG	GG	GA	GG	GA
1112212	G/C	Unknown	91201330	+	GC	GC	GC	GC	GC	GC	GG	GC	GC	GC	GC	GC	GC	GC	GC	GC	GC	GC	GC	GC	GC	GC	GC	GC	GC	GC	GC	GC	GC	GC	GC	GC	GC	GC	GC	GC	GC	GC	GC	GC	GC	GC	GC	GC	GC
1112212	G/C	Unknown	91201365	+	GC	GC	GC	GC	GC	GC	GG	GC	GC	GC	GC	GC	GC	GC	GC	GC	GC	GC	GC	GC	GC	GC	GC	GC	GC	GC	GC	GC	GC	GC	GC	GC	GC	GC	GC	GC	GC	GC	GC	GC	GC	GC	GC	GC	GC
1112616	A/C	Unknown	91234466	+	AA	AA	AA	AC	AA	AA	AA	AA	AA	AA	AA	AC	AA	AA	AA	AC	AC	AA	AA	AA	AA	AA	AA	AA	AC	AA	AA	AA	AA	AA	AA	AA	AA	AA	AA	AA	AA	AA	AA	AC	AA	AA	AA	AC	AA
[truncated: 1,599 more rows]
[truncated: 160 more columns]
