# Supplementary material for: Drought Responsive Putative Marker-Trait Association in Tall Fescue as Influenced by the Presence of a Novel Endophyte
Source: Front Plant Sci. 2021 Oct 20;12:729797. doi: 10.3389/fpls.2021.729797 (PMC8565914; doi:10.3389/fpls.2021.729797)
Supplement: Supplementary file 4 [file Table_3.XLSX]

## Sheet: MTAs
Supplementary Table S3 List of significant SNP markers associated with plant height, plant spread, plant vigor, and dry biomass weight identified from the NFTD07 tall fescue population. Endophyte status, trait names, SNP marker names, SNP marker position, p-value, additive effect, R2 value of the marker and Bonferroni Correction were provided.
SL. No.ǂ	Trait names (with time points and endophyte status)	SNP marker names	SNP marker Position (Mb)¶	p-value	Additive effect	Marker R2	Negative Log10(p)	Bonferroni correction (negative Log10(p)≥4.9 at significance level 0.05
EP population
SV.ep_1	SPDApr17EP	SNP_1038209	1	8.57e-05	-1.0545	0.09528	4.06702	FALSE
	VGRAug16EP			0.00086515	-0.20558	0.07224	3.06291	FALSE
H.ep_2	PHTApr17EP	SNP_8799065	8.7	6.608e-06	NaN	0.10686	5.17993	TRUE
SV.ep_3	SPDJun17EP	11034442	11	0.00075456	NaN	0.0573	3.12231	FALSE
	VGRSep17EP			0.00084044	NaN	0.05454	3.07549	FALSE
HS.ep_4	PHTAug16EP	16824944	16.8	0.00048998	NaN	0.06255	3.30982	FALSE
	SPDSep16EP			0.00095226	NaN	0.05576	3.02124	FALSE
D.ep_5	DWTJun18EP	17669207	17.6	0.00015852	NaN	0.07261	3.79992	FALSE
S.ep_6	SPDOct17EP	20761764	20.7	0.00049931	NaN	0.05805	3.30163	FALSE
S.ep_7	SPDJun17EP	26956472	26.9	0.00059649	NaN	0.05957	3.2244	FALSE
S.ep_8	SPDMay17EP	31050300	31	6.2645e-05	3.32409	0.09507	4.20311	FALSE
	SPDMay17EP	31050304	31	6.2645e-05	3.32409	0.09507	4.20311	FALSE
H.ep_9	PHTJun15EP	44503953	44.5	0.00086659	NaN	0.05652	3.06219	FALSE
V.ep_10	VGRSep17EP	44518876	44.5	0.00026644	NaN	0.06538	3.5744	FALSE
S.ep_11	SPDSep17EP	45510037	45.5	0.00033091	NaN	0.06355	3.48029	FALSE
H.ep_12	PHTMay17EP	46087215	46	0.00066408	NaN	0.05844	3.17778	FALSE
V.ep_13	VGROct17EP	48352372	48.3	0.00095073	NaN	0.05144	3.02194	FALSE
S.ep_14	SPDMay17EP	52681774	52.6	0.00025575	NaN	0.06483	3.59218	FALSE
D.ep_15	DWTJun16EP	58800484	58.8	0.00087347	NaN	0.05641	3.05875	FALSE
S.ep_16	SPDMay17EP	59849124	59.8	1.3455e-05	NaN	0.09317	4.87112	FALSE
D.ep_17	DWTJul15EP	61531515	61.5	0.00096581	NaN	0.05561	3.01511	FALSE
V.ep_18	VGROct17EP	63608980	63.6	0.00023651	NaN	0.06408	3.62615	FALSE
S.ep_19	SPDApr17EP	64005112	64	0.00034495	NaN	0.06434	3.46224	FALSE
H.ep_20	PHTMay16EP	66775007	66.7	0.00055346	NaN	0.05928	3.25691	FALSE
H.ep_21	PHTAug16EP	67685857	67.6	0.00019762	NaN	0.07161	3.70417	FALSE
S.ep_22	SPDSep16EP	69669107	69.6	0.00088036	NaN	0.05652	3.05534	FALSE
S.ep_23	SPDSep16EP	71354215	71.3	0.00051618	NaN	0.06175	3.2872	FALSE
	SPDApr17EP			0.00045395	NaN	0.06168	3.34299	FALSE
S.ep_24	SPDMay17EP	72809036	72.8	1.498e-05	-1.703	0.10993	4.82449	FALSE
	SPDJun17EP			1.3501e-05	-1.4566	0.11617	4.86963	FALSE
H.ep_25	PHTJun15EP	72965779	72.9	0.00057157	NaN	0.06057	3.24293	FALSE
SV.ep_26	VGRAug16EP	75363871	75.3	0.0007313	-0.21122	0.07403	3.1359	FALSE
	SPDApr17EP			6.0845e-06	-1.2066	0.12387	5.21578	TRUE
V.ep_27	VGRAug16EP	75856836	75.8	0.00064839	NaN	0.05934	3.18816	FALSE
D.ep_28	DWTJun18EP	77198019	77.1	0.0002193	NaN	0.06939	3.65896	FALSE
S.ep_29	SPDApr17EP	77859422	77.8	0.00068633	NaN	0.05771	3.16347	FALSE
S.ep_30	SPDSep16EP	77992676	77.9	0.00094623	NaN	0.05582	3.024	FALSE
S.ep_31	SPDAug16EP	81925080	81.9	0.00065998	NaN	0.05883	3.18047	FALSE
S.ep_32	SPDMay17EP	85099229	85	7.338e-05	3.59206	0.09344	4.13442	FALSE
V.ep_33	VGROct17EP	87364614	87.3	0.00082084	NaN	0.05276	3.08574	FALSE
HS.ep_34	SPDAug16EP	89594481	89.5	0.00089339	NaN	0.0559	3.04896	FALSE
	PHTSep16EP			0.00099102	NaN	0.05551	3.00392	FALSE
D.ep_35	DWTApr17EP	89723680	89.7	6.1753e-05	NaN	0.08242	4.20934	FALSE
V.ep_36	VGRJun15EP	90061587	90	0.0002765	NaN	0.06811	3.5583	FALSE
H.ep_37	PHTSep17EP	90149259	90.1	5.1142e-05	-1.8405	0.09488	4.29122	FALSE
H.ep_38	PHTSep17EP	90787394	90.7	6.5284e-05	1.7497	0.09242	4.18519	FALSE
H.ep_39	PHTApr17EP	91084048	91	0.00024411	NaN	0.0696	3.61241	FALSE
S.ep_40	SPDSep16EP	92621494	92.6	0.00064083	2.07287	0.07565	3.19326	FALSE
S.ep_41	SPDAug16EP	92829771	92.8	0.00042841	4.38959	0.07927	3.36814	FALSE
S.ep_42	SPDSep17EP	93741373	93.7	0.00090962	NaN	0.054	3.04114	FALSE
H.ep_43	PHTSep17EP	94335864	94.3	6.8799e-05	1.76294	0.09189	4.16242	FALSE
	PHTSep17EP	94335848	94.3	0.00024086	NaN	0.06386	3.61824	FALSE
H.ep_44	PHTApr17EP	94997826	94.9	4.6201e-05	NaN	0.08653	4.33535	FALSE
S.ep_45	SPDApr17EP	95171597	95.1	0.00064606	NaN	0.05829	3.18973	FALSE
S.ep_46	SPDJun15EP	96557895	96.5	0.00091763	NaN	0.0532	3.03733	FALSE
S.ep_47	SPDApr17EP	96920650	96.9	0.00081162	-2.1786	0.07158	3.09065	FALSE
S.ep_48	SPDOct17EP	96958397	96.9	0.00085942	NaN	0.05307	3.06579	FALSE
V.ep_49	VGRAug16EP	98293586	98.2	0.00097039	NaN	0.05542	3.01305	FALSE
V.ep_50	VGRSep17EP	98358487	98.3	0.000597	NaN	0.05775	3.22403	FALSE
V.ep_51	VGROct17EP	99166082	99.1	0.00066668	NaN	0.05463	3.17608	FALSE
D.ep_52	DWTJul15EP	99980756	99.9	0.00036238	NaN	0.06523	3.44084	FALSE
S.ep_53	SPDMay17EP	101757181	101.7	0.00031608	-1.6407	0.07852	3.5002	FALSE
S.ep_54	SPDOct17EP	117302578	117.3	0.0007824	-0.082624	0.06874	3.10657	FALSE
S.ep_55	SPDSep17EP	120953217	120.9	5.8717e-05	NaN	0.08027	4.23124	FALSE
D.ep_56	DWTJun18EP	123251539	123.2	0.00051471	NaN	0.06104	3.28844	FALSE
S.ep_57	SPDOct17EP	123622142	123.6	0.00020957	NaN	0.0661	3.67867	FALSE
V.ep_58	VGRJun15EP	123656115	123.6	7.8102e-05	NaN	0.08086	4.10734	FALSE
	VGRSep15EP			0.0005628	NaN	0.06065	3.24965	FALSE
H.ep_59	PHTOct17EP	124348351	124.3	0.00082924	NaN	0.05436	3.08132	FALSE
S.ep_60	SPDAug16EP	125100400	125.1	0.00072255	NaN	0.05795	3.14113	FALSE
V.ep_61	VGRSep15EP	126973249	126.9	0.00085645	NaN	0.05656	3.0673	FALSE
S.ep_62	SPDMay17EP	128041648	128	8.6034e-05	3.42038	0.09181	4.06533	FALSE
V.ep_63	VGROct17EP	129655060	129.6	0.00025479	NaN	0.06339	3.59382	FALSE
H.ep_64	PHTSep16EP	136209828	136.2	0.00063042	NaN	0.05994	3.20037	FALSE
S.ep_65	SPDSep17EP	138143382	138.1	0.00044705	0.36421	0.07638	3.34964	FALSE
S.ep_66	SPDSep16EP	139134835	139.1	0.00035528	NaN	0.06544	3.44943	FALSE
D.ep_67	DWTApr17EP	142051815	142	0.00069195	NaN	0.05844	3.15993	FALSE
V.ep_68	VGRSep17EP	144067143	144	0.00041571	NaN	0.06116	3.38121	FALSE
S.ep_69	SPDJun15EP	144784085	144.7	0.00033553	NaN	0.06257	3.47427	FALSE
H.ep_70	PHTSep16EP	153274658	153.2	0.00089569	NaN	0.0565	3.04784	FALSE
S.ep_71	SPDMay17EP	210968053	210.9	7.5174e-06	2.39708	0.11716	5.12393	TRUE
	SPDJun17EP			0.00013992	1.87555	0.09085	3.85412	FALSE
EF population
S.ef_1	SPDJun15EF	18777574	18.7	0.0004318	NaN	0.06268	3.36472	FALSE
H.ef_2	PHTApr17EF	19205904	19.2	0.00085712	NaN	0.05563	3.06696	FALSE
HS.ef_3	PHTSep17EF	10608773	10.6	0.00054199	-1.5358	0.07818	3.26601	FALSE
	SPDSep17EF			0.0009753	-1.3226	0.07151	3.01086	FALSE
H.ef_4	PHTSep17EF	20174396	20.1	0.00061444	NaN	0.06061	3.21152	FALSE
H.ef_5	PHTMay17EF	20583903	20.5	0.00094396	NaN	0.05552	3.02505	FALSE
	PHTMay17EF	20583923	20.5	0.00094396	NaN	0.05552	3.02505	FALSE
H.ef_6	PHTApr17EF	28784429	28.7	0.00014415	NaN	0.07293	3.84119	FALSE
V.ef_7	VGRSep15EF	29368186	29.3	0.00074878	NaN	0.05724	3.12565	FALSE
D.ef_8	DWTJun16EF	31293528	31.2	0.00076125	-38.259	0.07372	3.11847	FALSE
D.ef_9	DWTJul15EF	31595953	31.5	0.00016445	NaN	0.0727	3.78397	FALSE
S.ef_10	SPDMay17EF	31728965	31.7	0.00086724	NaN	0.05606	3.06186	FALSE
HS.ef_11	SPDMay17EF	32318191	32.3	0.00086817	NaN	0.05605	3.0614	FALSE
	PHTSep17EF			0.00011048	NaN	0.07787	3.95672	FALSE
S.ef_12	SPDSep16EF	44725770	44.7	0.00096964	-2.9994	0.07565	3.01339	FALSE
S.ef_13	SPDMay17EF	45269769	45.2	0.00029474	NaN	0.06657	3.53056	FALSE
V.ef_14	VGRSep15EF	46999567	46.9	0.00087197	NaN	0.05577	3.0595	FALSE
V.ef_15	VGRSep15EF	48081624	48	0.00084679	NaN	0.05605	3.07222	FALSE
H.ef_16	PHTJun15EF	48289075	48.2	0.00038204	NaN	0.06399	3.41789	FALSE
V.ef_17	VGRSep15EF	51369674	51.3	0.00030913	NaN	0.06582	3.50986	FALSE
S.ef_18	SPDOct17EF	56653088	56.6	0.00096641	0.55943	0.07254	3.01484	FALSE
H.ef_19	PHTMay17EF	57420954	57.4	3.0816e-13	3.00185	0.32927	12.5112	TRUE
V.ef_20	VGRSep15EF	57959105	57.9	0.00074408	NaN	0.0573	3.12838	FALSE
H.ef_21	PHTMay17EF	58141388	58.1	0.00023598	NaN	0.0691	3.62712	FALSE
S.ef_22	SPDApr17EF	59148851	59.1	0.00084553	NaN	0.05683	3.07287	FALSE
V.ef_23	VGRJun15EF	59704474	59.7	5.1871e-05	NaN	0.08498	4.28508	FALSE
D.ef_24	DWTJul15EF	59794100	59.7	0.00073326	NaN	0.05798	3.13474	FALSE
D.ef_25	DWTNov17EF	60994487	60.9	0.00028337	NaN	0.07045	3.54765	FALSE
	DWTJun18EF	60994487	60.9	0.00033915	NaN	0.06608	3.46961	FALSE
	DWTNov17EF	60994497	60.9	0.00015637	NaN	0.07664	3.80585	FALSE
	DWTJun18EF	60994497	60.9	0.00020583	NaN	0.07107	3.68649	FALSE
PV.ef_26	VGRJun15EF	62698688	62.6	0.00086446	NaN	0.05681	3.06326	FALSE
	PHTApr17EF			0.00034609	NaN	0.06436	3.46081	FALSE
D.ef_27	DWTJun16EF	65384105	65.3	0.00078169	NaN	0.05762	3.10697	FALSE
H.ef_28	PHTOct17EF	66145018	66.1	0.00039964	NaN	0.06579	3.39833	FALSE
H.ef_29	PHTMay17EF	70192673	70.1	4.5774e-07	0.40922	0.15494	6.33938	TRUE
S.ef_30	SPDJun17EF	71766016	71.7	0.00045307	NaN	0.06186	3.34383	FALSE
HSV.ef_31	PHTSep17EF	75375405	75.3	0.00058281	NaN	0.06114	3.23447	FALSE
	SPDSep17EF			9.1178e-07	NaN	0.12794	6.04011	TRUE
	VGRSep17EF			2.62e-05	NaN	0.092	4.5817	FALSE
	SPDOct17EF			4.4516e-06	NaN	0.11237	5.35148	TRUE
SV.ef_32	SPDAug16EF	77518826	77.5	0.00031002	-2.4332	0.08415	3.50861	FALSE
	VGRAug16EF			0.00093814	-0.66058	0.08809	3.02773	FALSE
DSV.ef_33	VGRJun15EF	77814415	77.8	0.00077426	NaN	0.05789	3.11111	FALSE
	DWTJun16EF			0.00010304	NaN	0.07774	3.98699	FALSE
	SPDMay17EF			0.00051232	NaN	0.06116	3.29046	FALSE
D.ef_34	DWTApr17EF	87765799	87.7	0.00052326	NaN	0.06139	3.28128	FALSE
DH.ef_35	DWTJul15EF	88599613	88.5	0.00016593	5.77996	0.08965	3.78008	FALSE
	PHTMay17EF			0.00032484	0.9746	0.08244	3.48833	FALSE
V.ef_36	VGRJun15EF	92357782	92.3	0.00054857	NaN	0.06127	3.26077	FALSE
H.ef_37	PHTJun15EF	92778415	92.7	0.00086171	NaN	0.0561	3.06464	FALSE
S.ef_38	SPDOct17EF	93464958	93.4	0.00064803	NaN	0.06057	3.1884	FALSE
S.ef_39	SPDOct17EF	96083599	96	0.00043178	NaN	0.06464	3.36474	FALSE
V.ef_40	VGRSep15EF	98005260	98	0.00039108	NaN	0.06353	3.40773	FALSE
H.ef_41	PHTOct17EF	99523091	99.5	0.00023063	NaN	0.07138	3.63708	FALSE
D.ef_42	DWTJul15EF	100499457	100.4	0.00031059	NaN	0.06639	3.50781	FALSE
S.ef_43	SPDJun15EF	100613154	100.6	0.00035558	-1.8033	0.08088	3.44906	FALSE
H.ef_44	PHTMay16EF	115614362	115.6	0.00067211	NaN	0.05845	3.17256	FALSE
H.ef_45	PHTMay17EF	119495532	119.4	0.00081665	0.5303	0.07264	3.08796	FALSE
S.ef_46	SPDOct17EF	119904360	119.9	0.00037747	-1.2919	0.08277	3.42312	FALSE
H.ef_47	PHTOct17EF	125216321	125.2	0.00034083	NaN	0.0674	3.46746	FALSE
H.ef_48	PHTJun15EF	129389720	129.3	1.5585e-05	NaN	0.09612	4.80729	FALSE
D.ef_49	DWTJul15EF	129851625	129.8	6.3903e-05	NaN	0.08221	4.19448	FALSE
H.ef_50	PHTJun15EF	136361717	136.3	0.00082677	NaN	0.0565	3.08262	FALSE
D.ef_51	DWTJun18EF	139342305	139.3	7.4037e-05	NaN	0.08141	4.13055	FALSE
H.ef_52	PHTMay17EF	139941811	139.9	0.00050595	0.95738	0.07772	3.29589	FALSE
D.ef_53	DWTNov17EF	140530490	140.5	7.8946e-05	NaN	0.08382	4.10267	FALSE
D.ef_54	DWTApr17EF	141653802	141.6	0.00048324	NaN	0.06217	3.31584	FALSE
H.ef_55	PHTMay16EF	143700947	143.7	0.00042239	NaN	0.06296	3.37429	FALSE
V.ef_56	VGRSep17EF	143720205	143.7	0.00061086	NaN	0.0602	3.21406	FALSE
H.ef_57	PHTAug16EF	144265489	144.2	0.00066853	NaN	0.06255	3.17488	FALSE
D.ef_58	DWTApr17EF	210794377	210.7	0.00057477	NaN	0.06047	3.24051	FALSE
S.ef_59	SPDSep17EF	211599945	211.5	0.00078259	NaN	0.05795	3.10647	FALSE
HS.ef_60	PHTSep17EF	213575249	213.5	0.00031531	1.17282	0.08405	3.50126	FALSE
	SPDSep17EF			0.00028254	0.67413	0.08483	3.54892	FALSE
S.ef_61	SPDAug16EF	296672096	296.3	0.00038864	NaN	0.06511	3.41045	FALSE
Both EP and EF populations
S_1#	SPDAug16EP	10249894	10.2	0.00092439	NaN	0.05557	3.03414	FALSE
	SPDSep17EF			0.00051505	NaN	0.06207	3.28815	FALSE
HS_2#	PHTJun15EF	49800858	49.8	2.7167e-05	10.4249	0.10869	4.56596	FALSE
	PHTMay16EF			1.1178e-06	19.669	0.14389	5.95164	TRUE
	SPDAug16EP			0.0001985	4.8611	0.08748	3.70224	FALSE
	SPDApr17EP			0.00022665	4.15322	0.08496	3.64464	FALSE
	SPDJun17EP			0.00017136	2.14862	0.08869	3.76609	FALSE
	SPDOct17EP			7.6286e-06	0.5063	0.11595	5.11756	TRUE
HSV_3#	PHTJun15EF	58579301	58.5	7.1784e-07	-7.545	0.149	6.14397	TRUE
	VGRJun15EF			0.00083717	-0.14252	0.07294	3.07719	FALSE
	PHTMay16EF			6.3764e-05	-9.1602	0.09935	4.19542	FALSE
	SPDAug16EP			0.00013517	-2.6779	0.0916	3.86912	FALSE
	SPDJun17EP			1.0699e-05	-1.3765	0.11872	4.97066	TRUE
	SPDSep17EP			0.00020566	-0.30184	0.0844	3.68685	FALSE
	SPDOct17EP			0.00028223	-0.13201	0.07895	3.5494	FALSE
SV_4#	SPDAug16EP	60088229	60	4.011e-05	NaN	0.08671	4.39675	FALSE
	VGRAug16EP			0.00061894	NaN	0.05979	3.20835	FALSE
	SPDSep16EP			0.0002681	NaN	0.06824	3.5717	FALSE
	SPDApr17EF			0.00070682	NaN	0.05857	3.15069	FALSE
	SPDJun17EP			4.7131e-05	NaN	0.08471	4.32669	FALSE
PV_5#	PHTMay17EF	65319985	65.3	0.00096664	NaN	0.05529	3.01474	FALSE
	PHTMay17EF	65320003	65.3	0.00096664	NaN	0.05529	3.01474	FALSE
	PHTSep17EP	65319985	65.3	0.00070606	NaN	0.05407	3.15116	FALSE
	PHTSep17EP	65320003	65.3	0.00070606	NaN	0.05407	3.15116	FALSE
	VGRSep17EP	65319985	65.3	0.0006675	NaN	0.0567	3.17555	FALSE
	VGRSep17EP	65320003	65.3	0.0006675	NaN	0.0567	3.17555	FALSE
	PHTOct17EP	65319985	65.3	0.00017831	NaN	0.06884	3.74882	FALSE
	PHTOct17EP	65320003	65.3	0.00017831	NaN	0.06884	3.74882	FALSE
HSV_6#	PHTJun15EF	68245853	68.2	6.5354e-05	10.7802	0.09917	4.18473	FALSE
	PHTMay16EF			1.419e-06	19.3425	0.14121	5.84802	TRUE
	SPDAug16EP			0.00016393	4.99759	0.08953	3.78534	FALSE
	VGRAug16EP			0.00029437	0.90923	0.08374	3.53111	FALSE
	SPDApr17EP			0.00017052	4.10382	0.08797	3.76822	FALSE
	SPDJun17EP			0.00010297	2.22513	0.09414	3.98729	FALSE
	SPDOct17EP			1.1898e-05	0.52364	0.11132	4.92453	TRUE
HS_7#	PHTMay16EP	79199392	79.1	0.00081152	2.99671	0.07099	3.0907	FALSE
	PHTMay16EF			0.00047454	2.97619	0.07791	3.32373	FALSE
	SPDMay17EP			0.00017588	1.27458	0.08448	3.75478	FALSE
S_8#	SPDApr17EF	92276031	92.2	0.00069462	NaN	0.05874	3.15825	FALSE
	SPDSep17EP			0.00094023	NaN	0.05369	3.02677	FALSE
DS_9#	SPDSep17EF	99735072	99.7	0.00081091	NaN	0.0576	3.09103	FALSE
	DWTJun18EP			0.00046262	NaN	0.06207	3.33478	FALSE
HSV_10#	PHTJun15EF	114731786	114.7	6.5103e-05	-10.799	0.09921	4.1864	FALSE
	PHTMay16EF			1.4105e-06	-19.301	0.14128	5.85063	TRUE
	SPDAug16EP			0.00011639	-4.8021	0.09321	3.93408	FALSE
	VGRAug16EP			0.00099269	-0.84125	0.07078	3.00319	FALSE
	SPDApr17EP			0.00018613	-4.1107	0.08704	3.73018	FALSE
	SPDJun17EP			0.00018563	-2.1855	0.08783	3.73135	FALSE
	PHTOct17EP			0.00040002	-1.5261	0.07681	3.39792	FALSE
	SPDOct17EP			1.3373e-05	-0.51779	0.11011	4.87377	FALSE
H_11#	PHTMay16EP	119793506	119.7	7.6753e-05	NaN	0.07845	4.1149	FALSE
	PHTMay16EF			1.5788e-06	NaN	0.11994	5.80167	TRUE
HSV_12#	PHTJun15EF	122444541	122.4	6.5371e-05	10.7813	0.09916	4.18461	FALSE
	PHTMay16EF			2.1702e-06	18.9088	0.13646	5.6635	TRUE
	SPDAug16EP			0.00020035	5.00468	0.08738	3.69821	FALSE
	VGRAug16EP			0.00048024	0.94391	0.0785	3.31854	FALSE
	SPDApr17EP			0.00022572	4.20219	0.08501	3.64643	FALSE
	SPDJun17EP			0.00018549	2.16828	0.08784	3.73168	FALSE
	SPDOct17EP			6.4314e-06	0.49689	0.11773	5.19169	TRUE
SV_13#	SPDAug16EF	131749672	131.7	0.0006943	NaN	0.05935	3.15845	FALSE
	VGRAug16EF			0.00017732	NaN	0.08905	3.75124	FALSE
	SPDApr17EP			0.00013374	NaN	0.07361	3.87374	FALSE
	SPDApr17EF			0.00079344	NaN	0.05745	3.10049	FALSE
	SPDMay17EF			1.9546e-05	NaN	0.09385	4.70894	FALSE
S_14#	SPDSep16EF	214379666	214.3	0.00067832	-4.4472	0.07969	3.16857	FALSE
	SPDMay17EP			1.7341e-05	-3.51	0.1084	4.76093	FALSE
	SPDJun17EP			0.00014293	-1.9861	0.09063	3.84488	FALSE
HS_15#	PHTAug16EF	242361766	242.3	0.00021994	NaN	0.07417	3.6577	FALSE
	PHTSep16EF			0.0003371	NaN	0.06523	3.47224	FALSE
	SPDSep16EF			1.4117e-05	NaN	0.10433	4.85026	FALSE
	SPDMay17EP			0.0008445	NaN	0.05372	3.0734	FALSE
ǂH for PHT; S for SPD; V for VGR; D for DWT; ep for trait of endophyte positive population; ef for trait of endophyte free population; 1, 2, and 3 for significant marker occurrence numbers
#Significant MTAs found between endophyte positive and endophyte free population
¶SNP position obtained from Stacks de novo SNP call pipeline
Red colored MTAs were passed Bonferroni correction
Boldface, MTAs were identified under natural drought condition
